# Supplementary material for: Analysis of zebrafish periderm enhancers facilitates identification of a regulatory variant near human KRT8/18
Source: bioRxiv preprint, doi:10.1101/2020.01.27.921320, version 1 (2020-01-27)
Supplement: Supplementary File 1 [file 921320_file03.xlsx]

## Sheet: 3a
SNP number	CHR		BP		SNP	A1*	A2**	P.meta.effects	OR	L95.meta	U95.meta
1	12	53340600	53340600	chr12 53340600 53340600	rs11170342:53340600:G:A	A	G	7.65639e-07	0.788807	0.722639	0.861035
2	12	53344318	53344318	chr12 53344318 53344318	rs2070875:53344318:G:T	T	G	7.93566e-07	0.792191	0.726807	0.863457
3	12	53346750	53346750	chr12 53346750 53346750	rs3741442:53346750:C:T	T	C	4.46694e-07	0.78818	0.723033	0.859197
4	12	53351208	53351208	chr12 53351208 53351208	rs11170344:53351208:G:A	A	G	4.1381e-07	0.782073	0.715577	0.854748
5	12	53352572	53352572	chr12 53352572 53352572	rs7299694:53352572:A:C	C	A	4.21845e-06	0.821165	0.759836	0.887443
6	12	53353410	53353410	chr12 53353410 53353410	rs6580920:53353410:C:T	T	C	9.39965e-06	0.826731	0.765072	0.89336
7	12	53353759	53353759	chr12 53353759 53353759	rs4503623:53353759:T:C	C	T	6.22266e-06	0.82354	0.761964	0.890092
8	12	53354622	53354622	chr12 53354622 53354622	rs2363635	C	T	3.35193e-06	0.819937	0.758796	0.886003
9	12	53355557	53355557	chr12 53355557 53355557	rs2682339:53355557:C:G	G	C	4.70411e-06	0.821767	0.760352	0.888142
10	12	53355679	53355679	chr12 53355679 53355679	rs111680692:53355679:G:T	T	G	5.72031e-07	0.792584	0.728018	0.862877
11	12	53357335	53357335	chr12 53357335 53357335	rs2363632:53357335:T:G	G	T	1.50834e-07	0.780172	0.715303	0.850923
12	12	53358034	53358034	chr12 53358034 53358034	rs4919749:53358034:C:T	T	C	1.8922e-06	0.817003	0.756331	0.882541
13	12	53359118	53359118	chr12 53359118 53359118	rs2638522:53359118:C:T	T	C	3.95673e-06	0.82052	0.759157	0.886843
14	12	53360531	53360531	chr12 53360531 53360531	rs9634243:53360531:C:T	T	C	9.23062e-06	0.821006	0.757673	0.889632
*: if OR<0, risk allele is A1, minor allele, and labeled as green
**: if OR>0, non-risk allele is A2, major allele, and labeled as red

## Sheet: 3b_zGPAEs
SNP	Score			SNP #	SNP	interval	DeltaSVM	Out of 1000 random SNPs, count less than	p-value
hg19_snp151Common_rs76578074 range=chr12:169184-169202 5'pad=9 3'pad=9 strand=+ repeatMasking=none	0.649555			1	rs11170342	chr12:53340591-53340609	0.557777	646	0.646
hg19_snp151Common_rs59530692 range=chr12:229532-229550 5'pad=9 3'pad=9 strand=+ repeatMasking=none	-0.196515			2	rs2070875	chr12:53344309-53344327	-4.30121	2	0.002
hg19_snp151Common_rs118157961 range=chr12:279730-279748 5'pad=9 3'pad=9 strand=+ repeatMasking=none	-0.033445			3	rs3741442	chr12:53346741-53346759	-1.44122	142	0.142
hg19_snp151Common_rs78101097 range=chr12:328719-328737 5'pad=9 3'pad=9 strand=+ repeatMasking=none	0.857976			4	rs11170344	chr12:53351199-53351217	-0.359583	387	0.387
hg19_snp151Common_rs12306188 range=chr12:424700-424718 5'pad=9 3'pad=9 strand=+ repeatMasking=none	-0.219175			5	rs7299694	chr12:53352563-53352581	-0.521624	337	0.337
hg19_snp151Common_rs35882350 range=chr12:623120-623138 5'pad=9 3'pad=9 strand=+ repeatMasking=none	1.39411			6	rs6580920	chr12:53353401-53353419	-1.93828	74	0.074
hg19_snp151Common_rs77353687 range=chr12:728360-728378 5'pad=9 3'pad=9 strand=+ repeatMasking=none	2.12062			7	rs4503623	chr12:53353750-53353768	-0.573869	329	0.329
hg19_snp151Common_rs7966632 range=chr12:903849-903867 5'pad=9 3'pad=9 strand=+ repeatMasking=none	-0.039853			8	rs2363635	chr12:53354613-53354631	2.80077	966	0.966
hg19_snp151Common_rs16928264 range=chr12:1301225-1301243 5'pad=9 3'pad=9 strand=+ repeatMasking=none	-2.46714			9	rs2682339	chr12:53355548-53355566	-1.65579	113	0.113
hg19_snp151Common_rs7968604 range=chr12:1382173-1382191 5'pad=9 3'pad=9 strand=+ repeatMasking=none	-2.21756			10	rs111680692	chr12:53355670-53355688	-0.460981	354	0.354
hg19_snp151Common_rs7297773 range=chr12:1423339-1423357 5'pad=9 3'pad=9 strand=+ repeatMasking=none	0.948663			11	rs2363632	chr12:53357326-53357344	-1.78872	96	0.096
hg19_snp151Common_rs11834069 range=chr12:1606696-1606714 5'pad=9 3'pad=9 strand=+ repeatMasking=none	-0.331626			12	rs4919749	chr12:53358025-53358043	-1.75807	102	0.102
hg19_snp151Common_rs80100851 range=chr12:1663910-1663928 5'pad=9 3'pad=9 strand=+ repeatMasking=none	-0.127071			13	rs2638522	chr12:53359109-53359127	0.247313	573	0.573
hg19_snp151Common_rs115873398 range=chr12:1734598-1734616 5'pad=9 3'pad=9 strand=+ repeatMasking=none	2.24531			14	rs9634243	chr12:53360522-53360540	-0.77339	277	0.277
hg19_snp151Common_rs148891284 range=chr12:1786695-1786713 5'pad=9 3'pad=9 strand=+ repeatMasking=none	-1.03976
hg19_snp151Common_rs116283324 range=chr12:2088769-2088787 5'pad=9 3'pad=9 strand=+ repeatMasking=none	-1.80985
hg19_snp151Common_rs115322336 range=chr12:2175686-2175704 5'pad=9 3'pad=9 strand=+ repeatMasking=none	1.92815
hg19_snp151Common_rs4126711 range=chr12:2227302-2227320 5'pad=9 3'pad=9 strand=- repeatMasking=none	-0.564625
hg19_snp151Common_rs7974565 range=chr12:2271229-2271247 5'pad=9 3'pad=9 strand=+ repeatMasking=none	-2.15122
hg19_snp151Common_rs114173791 range=chr12:2442746-2442764 5'pad=9 3'pad=9 strand=+ repeatMasking=none	1.62607
hg19_snp151Common_rs11062231 range=chr12:2552971-2552989 5'pad=9 3'pad=9 strand=+ repeatMasking=none	-1.3729
hg19_snp151Common_rs4765695 range=chr12:2648494-2648512 5'pad=9 3'pad=9 strand=+ repeatMasking=none	-1.0715
hg19_snp151Common_rs4394887 range=chr12:2649971-2649989 5'pad=9 3'pad=9 strand=+ repeatMasking=none	2.33219
hg19_snp151Common_rs112699940 range=chr12:2698949-2698967 5'pad=9 3'pad=9 strand=+ repeatMasking=none	-0.288099
hg19_snp151Common_rs112108361 range=chr12:2734188-2734206 5'pad=9 3'pad=9 strand=+ repeatMasking=none	-0.001777
hg19_snp151Common_rs536704630 range=chr12:2755944-2755962 5'pad=9 3'pad=9 strand=+ repeatMasking=none	-1.45595
hg19_snp151Common_rs116690998 range=chr12:2890484-2890502 5'pad=9 3'pad=9 strand=+ repeatMasking=none	-1.42174
hg19_snp151Common_rs10848736 range=chr12:3019478-3019496 5'pad=9 3'pad=9 strand=+ repeatMasking=none	0.318457
hg19_snp151Common_rs77692554 range=chr12:3122546-3122564 5'pad=9 3'pad=9 strand=+ repeatMasking=none	-0.496678
hg19_snp151Common_rs11062460 range=chr12:3128446-3128464 5'pad=9 3'pad=9 strand=+ repeatMasking=none	0.466021
hg19_snp151Common_rs10848779 range=chr12:3178499-3178517 5'pad=9 3'pad=9 strand=+ repeatMasking=none	-2.8523
hg19_snp151Common_rs10744596 range=chr12:3266480-3266498 5'pad=9 3'pad=9 strand=+ repeatMasking=none	0.460354
hg19_snp151Common_rs733851 range=chr12:3293834-3293852 5'pad=9 3'pad=9 strand=- repeatMasking=none	0.470605
hg19_snp151Common_rs61907328 range=chr12:3324408-3324426 5'pad=9 3'pad=9 strand=+ repeatMasking=none	0.253835
hg19_snp151Common_rs10774146 range=chr12:3530005-3530023 5'pad=9 3'pad=9 strand=+ repeatMasking=none	1.58706
hg19_snp151Common_rs56347191 range=chr12:3617457-3617475 5'pad=9 3'pad=9 strand=+ repeatMasking=none	-0.175738
hg19_snp151Common_rs73047300 range=chr12:3783229-3783247 5'pad=9 3'pad=9 strand=+ repeatMasking=none	0.420775
hg19_snp151Common_rs7980338 range=chr12:4351309-4351327 5'pad=9 3'pad=9 strand=+ repeatMasking=none	0.126699
hg19_snp151Common_rs3217848 range=chr12:4396737-4396755 5'pad=9 3'pad=9 strand=+ repeatMasking=none	0.967928
hg19_snp151Common_rs9737706 range=chr12:4428836-4428854 5'pad=9 3'pad=9 strand=+ repeatMasking=none	-0.685115
hg19_snp151Common_rs111632733 range=chr12:4450244-4450262 5'pad=9 3'pad=9 strand=+ repeatMasking=none	-3.09635
hg19_snp151Common_rs2359249 range=chr12:4685435-4685453 5'pad=9 3'pad=9 strand=+ repeatMasking=none	1.4906
hg19_snp151Common_rs150244543 range=chr12:4823490-4823508 5'pad=9 3'pad=9 strand=+ repeatMasking=none	-2.10457
hg19_snp151Common_rs114589167 range=chr12:5131115-5131133 5'pad=9 3'pad=9 strand=+ repeatMasking=none	-0.439025
hg19_snp151Common_rs4415841 range=chr12:5376444-5376462 5'pad=9 3'pad=9 strand=+ repeatMasking=none	0.786769
hg19_snp151Common_rs1549036 range=chr12:5559371-5559389 5'pad=9 3'pad=9 strand=- repeatMasking=none	1.46445
hg19_snp151Common_rs10744691 range=chr12:5793102-5793120 5'pad=9 3'pad=9 strand=+ repeatMasking=none	0.562324
hg19_snp151Common_rs75161895 range=chr12:5863259-5863277 5'pad=9 3'pad=9 strand=+ repeatMasking=none	0.61369
hg19_snp151Common_rs7485896 range=chr12:5938437-5938455 5'pad=9 3'pad=9 strand=+ repeatMasking=none	-2.24569
hg19_snp151Common_rs11063972 range=chr12:6093477-6093495 5'pad=9 3'pad=9 strand=+ repeatMasking=none	-2.43365
hg19_snp151Common_rs75361962 range=chr12:6146122-6146140 5'pad=9 3'pad=9 strand=+ repeatMasking=none	-0.195242
hg19_snp151Common_rs12299007 range=chr12:6249287-6249305 5'pad=9 3'pad=9 strand=+ repeatMasking=none	0.269655
hg19_snp151Common_rs753951308 range=chr12:6414638-6414656 5'pad=9 3'pad=9 strand=+ repeatMasking=none	1.01938
hg19_snp151Common_rs79284737 range=chr12:6504330-6504348 5'pad=9 3'pad=9 strand=+ repeatMasking=none	-0.420184
hg19_snp151Common_rs73270520 range=chr12:7453520-7453538 5'pad=9 3'pad=9 strand=+ repeatMasking=none	2.3061
hg19_snp151Common_rs74717164 range=chr12:7546668-7546686 5'pad=9 3'pad=9 strand=+ repeatMasking=none	0.290543
hg19_snp151Common_rs190548214 range=chr12:7751239-7751257 5'pad=9 3'pad=9 strand=+ repeatMasking=none	-0.283623
hg19_snp151Common_rs11055158 range=chr12:7825126-7825144 5'pad=9 3'pad=9 strand=+ repeatMasking=none	1.7194
hg19_snp151Common_rs4883438 range=chr12:7875291-7875309 5'pad=9 3'pad=9 strand=+ repeatMasking=none	-3.48398
hg19_snp151Common_rs59456898 range=chr12:7948943-7948960 5'pad=9 3'pad=9 strand=+ repeatMasking=none	-1.14309
hg19_snp151Common_rs113535859 range=chr12:8294851-8294869 5'pad=9 3'pad=9 strand=+ repeatMasking=none	-1.56899
hg19_snp151Common_rs10770465 range=chr12:8460330-8460348 5'pad=9 3'pad=9 strand=+ repeatMasking=none	-0.448415
hg19_snp151Common_rs148514066 range=chr12:8539004-8539022 5'pad=9 3'pad=9 strand=+ repeatMasking=none	1.59189
hg19_snp151Common_rs4242893 range=chr12:8630920-8630938 5'pad=9 3'pad=9 strand=+ repeatMasking=none	0.201854
hg19_snp151Common_rs7307228 range=chr12:8688066-8688084 5'pad=9 3'pad=9 strand=+ repeatMasking=none	-0.831612
hg19_snp151Common_rs74741051 range=chr12:8709506-8709524 5'pad=9 3'pad=9 strand=+ repeatMasking=none	-2.60081
hg19_snp151Common_rs7313614 range=chr12:8875399-8875417 5'pad=9 3'pad=9 strand=+ repeatMasking=none	0.336021
hg19_snp151Common_rs73251237 range=chr12:8986446-8986464 5'pad=9 3'pad=9 strand=+ repeatMasking=none	-0.612383
hg19_snp151Common_rs2058428 range=chr12:9747504-9747522 5'pad=9 3'pad=9 strand=- repeatMasking=none	0.990172
hg19_snp151Common_rs17732655 range=chr12:9752088-9752106 5'pad=9 3'pad=9 strand=+ repeatMasking=none	1.96182
hg19_snp151Common_rs10844269 range=chr12:9796862-9796880 5'pad=9 3'pad=9 strand=+ repeatMasking=none	-0.027024
hg19_snp151Common_rs75257215 range=chr12:9843968-9843986 5'pad=9 3'pad=9 strand=+ repeatMasking=none	2.91149
hg19_snp151Common_rs12371981 range=chr12:9856433-9856451 5'pad=9 3'pad=9 strand=+ repeatMasking=none	-0.663365
hg19_snp151Common_rs776127859 range=chr12:9960717-9960735 5'pad=9 3'pad=9 strand=+ repeatMasking=none	-0.488474
hg19_snp151Common_rs79254621 range=chr12:10431099-10431117 5'pad=9 3'pad=9 strand=+ repeatMasking=none	-2.41108
hg19_snp151Common_rs74821572 range=chr12:10496133-10496151 5'pad=9 3'pad=9 strand=+ repeatMasking=none	0.388461
hg19_snp151Common_rs10772323 range=chr12:10733690-10733708 5'pad=9 3'pad=9 strand=+ repeatMasking=none	0.063466
hg19_snp151Common_rs34964378 range=chr12:10785509-10785526 5'pad=9 3'pad=9 strand=+ repeatMasking=none	2.80352
hg19_snp151Common_rs4763569 range=chr12:10792320-10792338 5'pad=9 3'pad=9 strand=+ repeatMasking=none	0.870947
hg19_snp151Common_rs78381270 range=chr12:10840165-10840183 5'pad=9 3'pad=9 strand=+ repeatMasking=none	-1.08346
hg19_snp151Common_rs73046589 range=chr12:10944113-10944131 5'pad=9 3'pad=9 strand=+ repeatMasking=none	0.620302
hg19_snp151Common_rs11054088 range=chr12:11115517-11115535 5'pad=9 3'pad=9 strand=+ repeatMasking=none	3.69187
hg19_snp151Common_rs10772405 range=chr12:11145817-11145835 5'pad=9 3'pad=9 strand=+ repeatMasking=none	1.01526
hg19_snp151Common_rs777303558 range=chr12:11214486-11214504 5'pad=9 3'pad=9 strand=+ repeatMasking=none	1.45959
hg19_snp151Common_rs114788163 range=chr12:11550356-11550374 5'pad=9 3'pad=9 strand=+ repeatMasking=none	-1.10021
hg19_snp151Common_rs73056812 range=chr12:11609568-11609586 5'pad=9 3'pad=9 strand=+ repeatMasking=none	-3.15709
hg19_snp151Common_rs12831430 range=chr12:11620585-11620603 5'pad=9 3'pad=9 strand=+ repeatMasking=none	0.170225
hg19_snp151Common_rs141655374 range=chr12:11692584-11692602 5'pad=9 3'pad=9 strand=+ repeatMasking=none	-0.199528
hg19_snp151Common_rs12300254 range=chr12:11755099-11755117 5'pad=9 3'pad=9 strand=+ repeatMasking=none	1.19871
hg19_snp151Common_rs60711165 range=chr12:11860682-11860700 5'pad=9 3'pad=9 strand=+ repeatMasking=none	1.72721
hg19_snp151Common_rs10772501 range=chr12:11877264-11877282 5'pad=9 3'pad=9 strand=+ repeatMasking=none	2.15362
hg19_snp151Common_rs17745932 range=chr12:11893148-11893166 5'pad=9 3'pad=9 strand=+ repeatMasking=none	5.36698
hg19_snp151Common_rs12229652 range=chr12:12102103-12102121 5'pad=9 3'pad=9 strand=+ repeatMasking=none	-1.5371
hg19_snp151Common_rs1641729 range=chr12:12251143-12251161 5'pad=9 3'pad=9 strand=+ repeatMasking=none	1.60773
hg19_snp151Common_rs6488517 range=chr12:12515057-12515075 5'pad=9 3'pad=9 strand=+ repeatMasking=none	-0.603689
hg19_snp151Common_rs114270120 range=chr12:12606709-12606727 5'pad=9 3'pad=9 strand=+ repeatMasking=none	0.006304
hg19_snp151Common_rs10845558 range=chr12:12642326-12642344 5'pad=9 3'pad=9 strand=+ repeatMasking=none	0.542933
hg19_snp151Common_rs1291356 range=chr12:13157931-13157949 5'pad=9 3'pad=9 strand=- repeatMasking=none	1.52383
hg19_snp151Common_rs12427224 range=chr12:13267694-13267712 5'pad=9 3'pad=9 strand=+ repeatMasking=none	-1.69787
hg19_snp151Common_rs6488590 range=chr12:13288837-13288855 5'pad=9 3'pad=9 strand=+ repeatMasking=none	-0.895924
hg19_snp151Common_rs75099364 range=chr12:13310549-13310567 5'pad=9 3'pad=9 strand=+ repeatMasking=none	0.519332
hg19_snp151Common_rs7968135 range=chr12:13344973-13344991 5'pad=9 3'pad=9 strand=+ repeatMasking=none	-0.723201
hg19_snp151Common_rs879111 range=chr12:13410258-13410276 5'pad=9 3'pad=9 strand=- repeatMasking=none	0.387899
hg19_snp151Common_rs10772657 range=chr12:13503872-13503890 5'pad=9 3'pad=9 strand=+ repeatMasking=none	-0.117386
hg19_snp151Common_rs7308685 range=chr12:13526296-13526314 5'pad=9 3'pad=9 strand=+ repeatMasking=none	-0.405117
hg19_snp151Common_rs4763343 range=chr12:13564953-13564971 5'pad=9 3'pad=9 strand=+ repeatMasking=none	0.856438
hg19_snp151Common_rs7970407 range=chr12:13876841-13876859 5'pad=9 3'pad=9 strand=+ repeatMasking=none	0.711456
hg19_snp151Common_rs116317074 range=chr12:13886985-13887003 5'pad=9 3'pad=9 strand=+ repeatMasking=none	-1.1834
hg19_snp151Common_rs73055672 range=chr12:13995224-13995242 5'pad=9 3'pad=9 strand=+ repeatMasking=none	2.0233
hg19_snp151Common_rs73296763 range=chr12:14024149-14024167 5'pad=9 3'pad=9 strand=+ repeatMasking=none	1.48373
hg19_snp151Common_rs61921177 range=chr12:14216587-14216605 5'pad=9 3'pad=9 strand=+ repeatMasking=none	0.82095
hg19_snp151Common_rs150055605 range=chr12:14233002-14233020 5'pad=9 3'pad=9 strand=+ repeatMasking=none	-0.790987
hg19_snp151Common_rs7958962 range=chr12:14265643-14265661 5'pad=9 3'pad=9 strand=+ repeatMasking=none	1.12769
hg19_snp151Common_rs12368467 range=chr12:14289737-14289755 5'pad=9 3'pad=9 strand=+ repeatMasking=none	1.27147
hg19_snp151Common_rs149070299 range=chr12:14533764-14533782 5'pad=9 3'pad=9 strand=+ repeatMasking=none	1.73082
hg19_snp151Common_rs111695839 range=chr12:14770958-14770976 5'pad=9 3'pad=9 strand=+ repeatMasking=none	0.000119
hg19_snp151Common_rs11056067 range=chr12:14776552-14776570 5'pad=9 3'pad=9 strand=+ repeatMasking=none	1.39525
hg19_snp151Common_rs7296937 range=chr12:14786402-14786420 5'pad=9 3'pad=9 strand=+ repeatMasking=none	-1.61027
hg19_snp151Common_rs17834491 range=chr12:14963331-14963349 5'pad=9 3'pad=9 strand=+ repeatMasking=none	3.03062
hg19_snp151Common_rs12305613 range=chr12:15077211-15077229 5'pad=9 3'pad=9 strand=+ repeatMasking=none	-0.6867
hg19_snp151Common_rs16910453 range=chr12:15129382-15129400 5'pad=9 3'pad=9 strand=+ repeatMasking=none	-0.453424
hg19_snp151Common_rs7301508 range=chr12:15135222-15135240 5'pad=9 3'pad=9 strand=+ repeatMasking=none	2.33895
hg19_snp151Common_rs78231610 range=chr12:15144702-15144720 5'pad=9 3'pad=9 strand=+ repeatMasking=none	0.69406
hg19_snp151Common_rs34639088 range=chr12:15223678-15223696 5'pad=9 3'pad=9 strand=+ repeatMasking=none	-0.706825
hg19_snp151Common_rs28444248 range=chr12:15259011-15259029 5'pad=9 3'pad=9 strand=+ repeatMasking=none	-0.129066
hg19_snp151Common_rs117772953 range=chr12:15339534-15339552 5'pad=9 3'pad=9 strand=+ repeatMasking=none	0.064417
hg19_snp151Common_rs73301699 range=chr12:15540995-15541013 5'pad=9 3'pad=9 strand=+ repeatMasking=none	-0.01408
hg19_snp151Common_rs80279996 range=chr12:15820137-15820155 5'pad=9 3'pad=9 strand=+ repeatMasking=none	0.507097
hg19_snp151Common_rs201711567 range=chr12:15928539-15928556 5'pad=9 3'pad=9 strand=+ repeatMasking=none	-0.198635
hg19_snp151Common_rs113432196 range=chr12:15966067-15966085 5'pad=9 3'pad=9 strand=+ repeatMasking=none	-2.61567
hg19_snp151Common_rs34785407 range=chr12:16357433-16357451 5'pad=9 3'pad=9 strand=+ repeatMasking=none	1.67273
hg19_snp151Common_rs11056885 range=chr12:16484939-16484957 5'pad=9 3'pad=9 strand=+ repeatMasking=none	1.60374
hg19_snp151Common_rs75932174 range=chr12:16736225-16736243 5'pad=9 3'pad=9 strand=+ repeatMasking=none	-1.29113
hg19_snp151Common_rs10846445 range=chr12:16977467-16977485 5'pad=9 3'pad=9 strand=+ repeatMasking=none	2.269
hg19_snp151Common_rs150531042 range=chr12:17272119-17272137 5'pad=9 3'pad=9 strand=+ repeatMasking=none	0.026767
hg19_snp151Common_rs142395769 range=chr12:17364685-17364703 5'pad=9 3'pad=9 strand=+ repeatMasking=none	0.551066
hg19_snp151Common_rs10840723 range=chr12:17630197-17630215 5'pad=9 3'pad=9 strand=+ repeatMasking=none	-2.21545
hg19_snp151Common_rs4764346 range=chr12:17868533-17868551 5'pad=9 3'pad=9 strand=+ repeatMasking=none	-1.49529
hg19_snp151Common_rs12813320 range=chr12:17884767-17884785 5'pad=9 3'pad=9 strand=+ repeatMasking=none	-2.7457
hg19_snp151Common_rs35328981 range=chr12:17907775-17907792 5'pad=9 3'pad=9 strand=+ repeatMasking=none	3.50431
hg19_snp151Common_rs151332178 range=chr12:18085650-18085668 5'pad=9 3'pad=9 strand=+ repeatMasking=none	1.71627
hg19_snp151Common_rs78558982 range=chr12:18134223-18134241 5'pad=9 3'pad=9 strand=+ repeatMasking=none	-1.90391
hg19_snp151Common_rs118001010 range=chr12:18388709-18388727 5'pad=9 3'pad=9 strand=+ repeatMasking=none	-0.941213
hg19_snp151Common_rs78426992 range=chr12:18553211-18553229 5'pad=9 3'pad=9 strand=+ repeatMasking=none	0.246199
hg19_snp151Common_rs74070259 range=chr12:18570933-18570951 5'pad=9 3'pad=9 strand=+ repeatMasking=none	2.85687
hg19_snp151Common_rs732669 range=chr12:18607695-18607713 5'pad=9 3'pad=9 strand=+ repeatMasking=none	1.72257
hg19_snp151Common_rs34743372 range=chr12:18634025-18634043 5'pad=9 3'pad=9 strand=+ repeatMasking=none	-0.834948
hg19_snp151Common_rs74070280 range=chr12:18638254-18638272 5'pad=9 3'pad=9 strand=+ repeatMasking=none	2.58643
hg19_snp151Common_rs668502 range=chr12:18811679-18811697 5'pad=9 3'pad=9 strand=+ repeatMasking=none	2.22472
hg19_snp151Common_rs117168184 range=chr12:18856747-18856765 5'pad=9 3'pad=9 strand=+ repeatMasking=none	-4.37127
hg19_snp151Common_rs76831606 range=chr12:19022568-19022586 5'pad=9 3'pad=9 strand=+ repeatMasking=none	2.02933
hg19_snp151Common_rs76466093 range=chr12:19118347-19118365 5'pad=9 3'pad=9 strand=+ repeatMasking=none	-0.662787
hg19_snp151Common_rs148121190 range=chr12:19469362-19469379 5'pad=9 3'pad=9 strand=+ repeatMasking=none	-0.856888
hg19_snp151Common_rs7296155 range=chr12:19679386-19679404 5'pad=9 3'pad=9 strand=+ repeatMasking=none	-0.184234
hg19_snp151Common_rs11611955 range=chr12:19934310-19934328 5'pad=9 3'pad=9 strand=+ repeatMasking=none	-0.180743
hg19_snp151Common_rs1918279 range=chr12:19935551-19935569 5'pad=9 3'pad=9 strand=+ repeatMasking=none	1.37363
hg19_snp151Common_rs6487052 range=chr12:20065487-20065505 5'pad=9 3'pad=9 strand=+ repeatMasking=none	-0.912548
hg19_snp151Common_rs10841408 range=chr12:20076282-20076300 5'pad=9 3'pad=9 strand=+ repeatMasking=none	2.85892
hg19_snp151Common_rs2728637 range=chr12:20128203-20128221 5'pad=9 3'pad=9 strand=- repeatMasking=none	1.51943
hg19_snp151Common_rs4762911 range=chr12:20160737-20160755 5'pad=9 3'pad=9 strand=+ repeatMasking=none	-0.484485
hg19_snp151Common_rs55701131 range=chr12:20251030-20251048 5'pad=9 3'pad=9 strand=+ repeatMasking=none	1.54736
hg19_snp151Common_rs74508296 range=chr12:20387024-20387042 5'pad=9 3'pad=9 strand=+ repeatMasking=none	1.10329
hg19_snp151Common_rs77801890 range=chr12:20461621-20461639 5'pad=9 3'pad=9 strand=+ repeatMasking=none	-1.07525
hg19_snp151Common_rs10743365 range=chr12:20526550-20526568 5'pad=9 3'pad=9 strand=+ repeatMasking=none	-1.27029
hg19_snp151Common_rs60593141 range=chr12:20531325-20531343 5'pad=9 3'pad=9 strand=+ repeatMasking=none	-0.691684
hg19_snp151Common_rs117429885 range=chr12:20590054-20590072 5'pad=9 3'pad=9 strand=+ repeatMasking=none	1.41446
hg19_snp151Common_rs59022244 range=chr12:20805354-20805372 5'pad=9 3'pad=9 strand=+ repeatMasking=none	-3.40554
hg19_snp151Common_rs11045524 range=chr12:20965780-20965798 5'pad=9 3'pad=9 strand=+ repeatMasking=none	-0.677322
hg19_snp151Common_rs12317610 range=chr12:20970773-20970791 5'pad=9 3'pad=9 strand=+ repeatMasking=none	1.27675
hg19_snp151Common_rs4387401 range=chr12:21006706-21006724 5'pad=9 3'pad=9 strand=+ repeatMasking=none	1.25774
hg19_snp151Common_rs143746605 range=chr12:21183710-21183728 5'pad=9 3'pad=9 strand=+ repeatMasking=none	0.894457
hg19_snp151Common_rs7311343 range=chr12:21228772-21228790 5'pad=9 3'pad=9 strand=+ repeatMasking=none	2.21243
hg19_snp151Common_rs73241801 range=chr12:21242992-21243010 5'pad=9 3'pad=9 strand=+ repeatMasking=none	-3.33816
hg19_snp151Common_rs75924117 range=chr12:21294791-21294809 5'pad=9 3'pad=9 strand=+ repeatMasking=none	0.922041
hg19_snp151Common_rs7136445 range=chr12:21324739-21324757 5'pad=9 3'pad=9 strand=+ repeatMasking=none	-0.226688
hg19_snp151Common_rs144019604 range=chr12:21407201-21407219 5'pad=9 3'pad=9 strand=+ repeatMasking=none	-0.192912
hg19_snp151Common_rs10841786 range=chr12:21443273-21443291 5'pad=9 3'pad=9 strand=+ repeatMasking=none	-1.14715
hg19_snp151Common_rs10841827 range=chr12:21621808-21621826 5'pad=9 3'pad=9 strand=+ repeatMasking=none	-0.167115
hg19_snp151Common_rs1580300 range=chr12:21701141-21701159 5'pad=9 3'pad=9 strand=- repeatMasking=none	0.954838
hg19_snp151Common_rs16924062 range=chr12:21768200-21768218 5'pad=9 3'pad=9 strand=+ repeatMasking=none	-1.04451
hg19_snp151Common_rs4148680 range=chr12:21958990-21959008 5'pad=9 3'pad=9 strand=- repeatMasking=none	0.113708
hg19_snp151Common_rs77732183 range=chr12:22003031-22003049 5'pad=9 3'pad=9 strand=+ repeatMasking=none	-0.216476
hg19_snp151Common_rs704210 range=chr12:22043860-22043878 5'pad=9 3'pad=9 strand=- repeatMasking=none	2.90277
hg19_snp151Common_rs9706519 range=chr12:22187403-22187421 5'pad=9 3'pad=9 strand=+ repeatMasking=none	0.918249
hg19_snp151Common_rs200304101 range=chr12:22346681-22346699 5'pad=9 3'pad=9 strand=+ repeatMasking=none	0.972361
hg19_snp151Common_rs140675748 range=chr12:22421549-22421566 5'pad=9 3'pad=9 strand=+ repeatMasking=none	0.378036
hg19_snp151Common_rs7970824 range=chr12:22482429-22482447 5'pad=9 3'pad=9 strand=+ repeatMasking=none	-0.87404
hg19_snp151Common_rs6487311 range=chr12:22687074-22687092 5'pad=9 3'pad=9 strand=+ repeatMasking=none	-0.940407
hg19_snp151Common_rs73082538 range=chr12:22851547-22851565 5'pad=9 3'pad=9 strand=+ repeatMasking=none	0.158082
hg19_snp151Common_rs73269352 range=chr12:23017791-23017809 5'pad=9 3'pad=9 strand=+ repeatMasking=none	-0.274023
hg19_snp151Common_rs2141567 range=chr12:23250925-23250943 5'pad=9 3'pad=9 strand=- repeatMasking=none	-1.49919
hg19_snp151Common_rs2446028 range=chr12:23253232-23253250 5'pad=9 3'pad=9 strand=+ repeatMasking=none	-0.363719
hg19_snp151Common_rs79429474 range=chr12:23312727-23312745 5'pad=9 3'pad=9 strand=+ repeatMasking=none	-0.181406
hg19_snp151Common_rs59801278 range=chr12:23366449-23366467 5'pad=9 3'pad=9 strand=+ repeatMasking=none	-0.52698
hg19_snp151Common_rs4520640 range=chr12:23433451-23433469 5'pad=9 3'pad=9 strand=+ repeatMasking=none	-2.27998
hg19_snp151Common_rs75591463 range=chr12:23446291-23446309 5'pad=9 3'pad=9 strand=+ repeatMasking=none	-0.500713
hg19_snp151Common_rs10734725 range=chr12:23573827-23573845 5'pad=9 3'pad=9 strand=+ repeatMasking=none	-0.774659
hg19_snp151Common_rs145763863 range=chr12:23673998-23674016 5'pad=9 3'pad=9 strand=+ repeatMasking=none	-0.551156
hg19_snp151Common_rs117141304 range=chr12:23824355-23824373 5'pad=9 3'pad=9 strand=+ repeatMasking=none	2.10066
hg19_snp151Common_rs11833903 range=chr12:23862682-23862700 5'pad=9 3'pad=9 strand=+ repeatMasking=none	-1.54819
hg19_snp151Common_rs116241957 range=chr12:23892431-23892449 5'pad=9 3'pad=9 strand=+ repeatMasking=none	-0.051287
hg19_snp151Common_rs111592523 range=chr12:23984439-23984457 5'pad=9 3'pad=9 strand=+ repeatMasking=none	3.04615
hg19_snp151Common_rs12319752 range=chr12:23985689-23985707 5'pad=9 3'pad=9 strand=+ repeatMasking=none	-0.235163
hg19_snp151Common_rs10505913 range=chr12:24043641-24043659 5'pad=9 3'pad=9 strand=+ repeatMasking=none	0.399841
hg19_snp151Common_rs10505931 range=chr12:24194786-24194804 5'pad=9 3'pad=9 strand=+ repeatMasking=none	0.663338
hg19_snp151Common_rs117907734 range=chr12:24244961-24244979 5'pad=9 3'pad=9 strand=+ repeatMasking=none	1.29612
hg19_snp151Common_rs35157827 range=chr12:24437452-24437470 5'pad=9 3'pad=9 strand=+ repeatMasking=none	-2.75434
hg19_snp151Common_rs114018973 range=chr12:24467639-24467657 5'pad=9 3'pad=9 strand=+ repeatMasking=none	-0.142441
hg19_snp151Common_rs4963786 range=chr12:24887282-24887300 5'pad=9 3'pad=9 strand=+ repeatMasking=none	-0.662897
hg19_snp151Common_rs79130412 range=chr12:24939915-24939933 5'pad=9 3'pad=9 strand=+ repeatMasking=none	0.925712
hg19_snp151Common_rs147064884 range=chr12:25012363-25012381 5'pad=9 3'pad=9 strand=+ repeatMasking=none	-0.85369
hg19_snp151Common_rs699033 range=chr12:25151218-25151236 5'pad=9 3'pad=9 strand=+ repeatMasking=none	1.36205
hg19_snp151Common_rs35755130 range=chr12:25435516-25435534 5'pad=9 3'pad=9 strand=+ repeatMasking=none	-0.63998
hg19_snp151Common_rs143518652 range=chr12:25576234-25576252 5'pad=9 3'pad=9 strand=+ repeatMasking=none	2.34191
hg19_snp151Common_rs74073907 range=chr12:25593769-25593787 5'pad=9 3'pad=9 strand=+ repeatMasking=none	-1.90681
hg19_snp151Common_rs34944742 range=chr12:25608862-25608880 5'pad=9 3'pad=9 strand=+ repeatMasking=none	0.754462
hg19_snp151Common_rs73287214 range=chr12:26013886-26013904 5'pad=9 3'pad=9 strand=+ repeatMasking=none	-0.325436
hg19_snp151Common_rs11048312 range=chr12:26024417-26024435 5'pad=9 3'pad=9 strand=+ repeatMasking=none	-2.20614
hg19_snp151Common_rs2198589 range=chr12:26029303-26029321 5'pad=9 3'pad=9 strand=+ repeatMasking=none	0.495024
hg19_snp151Common_rs10505985 range=chr12:26035833-26035851 5'pad=9 3'pad=9 strand=+ repeatMasking=none	-0.813798
hg19_snp151Common_rs55768874 range=chr12:26074562-26074580 5'pad=9 3'pad=9 strand=+ repeatMasking=none	0.802224
hg19_snp151Common_rs6487520 range=chr12:26116585-26116603 5'pad=9 3'pad=9 strand=+ repeatMasking=none	2.53865
hg19_snp151Common_rs114238638 range=chr12:26326358-26326376 5'pad=9 3'pad=9 strand=+ repeatMasking=none	-0.360234
hg19_snp151Common_rs2063632 range=chr12:26511759-26511777 5'pad=9 3'pad=9 strand=- repeatMasking=none	-1.10788
hg19_snp151Common_rs12826706 range=chr12:26639552-26639570 5'pad=9 3'pad=9 strand=+ repeatMasking=none	-0.406411
hg19_snp151Common_rs76956075 range=chr12:26857756-26857774 5'pad=9 3'pad=9 strand=+ repeatMasking=none	0.920457
hg19_snp151Common_rs113702245 range=chr12:27001998-27002016 5'pad=9 3'pad=9 strand=+ repeatMasking=none	-1.13733
hg19_snp151Common_rs12318803 range=chr12:27023788-27023806 5'pad=9 3'pad=9 strand=+ repeatMasking=none	2.14801
hg19_snp151Common_rs841612 range=chr12:27289478-27289496 5'pad=9 3'pad=9 strand=- repeatMasking=none	0.357615
hg19_snp151Common_rs149037992 range=chr12:27292471-27292489 5'pad=9 3'pad=9 strand=+ repeatMasking=none	-0.996264
hg19_snp151Common_rs12311660 range=chr12:27517832-27517850 5'pad=9 3'pad=9 strand=+ repeatMasking=none	-0.498965
hg19_snp151Common_rs68168722 range=chr12:27701039-27701057 5'pad=9 3'pad=9 strand=+ repeatMasking=none	1.78809
hg19_snp151Common_rs139359429 range=chr12:27837294-27837312 5'pad=9 3'pad=9 strand=+ repeatMasking=none	2.54051
hg19_snp151Common_rs11049187 range=chr12:27990488-27990506 5'pad=9 3'pad=9 strand=+ repeatMasking=none	1.68686
hg19_snp151Common_rs10843151 range=chr12:28471310-28471328 5'pad=9 3'pad=9 strand=+ repeatMasking=none	-0.696833
hg19_snp151Common_rs111230494 range=chr12:28486986-28487004 5'pad=9 3'pad=9 strand=+ repeatMasking=none	4.35007
hg19_snp151Common_rs11049736 range=chr12:28761348-28761366 5'pad=9 3'pad=9 strand=+ repeatMasking=none	-1.27561
hg19_snp151Common_rs76444125 range=chr12:28773533-28773551 5'pad=9 3'pad=9 strand=+ repeatMasking=none	0.156534
hg19_snp151Common_rs79112152 range=chr12:29136145-29136163 5'pad=9 3'pad=9 strand=+ repeatMasking=none	2.67089
hg19_snp151Common_rs12311115 range=chr12:29203476-29203494 5'pad=9 3'pad=9 strand=+ repeatMasking=none	-1.82387
hg19_snp151Common_rs78465465 range=chr12:29262709-29262727 5'pad=9 3'pad=9 strand=+ repeatMasking=none	0.506238
hg19_snp151Common_rs12305429 range=chr12:29283273-29283291 5'pad=9 3'pad=9 strand=+ repeatMasking=none	-0.817864
hg19_snp151Common_rs11050068 range=chr12:29283523-29283541 5'pad=9 3'pad=9 strand=+ repeatMasking=none	-3.84684
hg19_snp151Common_rs7978770 range=chr12:29567336-29567354 5'pad=9 3'pad=9 strand=+ repeatMasking=none	-1.22678
hg19_snp151Common_rs7301491 range=chr12:29689574-29689592 5'pad=9 3'pad=9 strand=+ repeatMasking=none	2.78072
hg19_snp151Common_rs11050288 range=chr12:29723319-29723337 5'pad=9 3'pad=9 strand=+ repeatMasking=none	-0.414772
hg19_snp151Common_rs114153207 range=chr12:29849575-29849593 5'pad=9 3'pad=9 strand=+ repeatMasking=none	0.340089
hg19_snp151Common_rs118044885 range=chr12:29924707-29924725 5'pad=9 3'pad=9 strand=+ repeatMasking=none	0.10736
hg19_snp151Common_rs12229602 range=chr12:30030700-30030718 5'pad=9 3'pad=9 strand=+ repeatMasking=none	-0.810669
hg19_snp151Common_rs73279088 range=chr12:30034481-30034499 5'pad=9 3'pad=9 strand=+ repeatMasking=none	0.38398
hg19_snp151Common_rs12821646 range=chr12:30144191-30144209 5'pad=9 3'pad=9 strand=+ repeatMasking=none	0.126678
hg19_snp151Common_rs147150895 range=chr12:30210350-30210368 5'pad=9 3'pad=9 strand=+ repeatMasking=none	1.23918
hg19_snp151Common_rs1652143 range=chr12:30418629-30418647 5'pad=9 3'pad=9 strand=- repeatMasking=none	-1.26163
hg19_snp151Common_rs4143645 range=chr12:30431543-30431561 5'pad=9 3'pad=9 strand=+ repeatMasking=none	-0.272021
hg19_snp151Common_rs11835199 range=chr12:30449690-30449708 5'pad=9 3'pad=9 strand=+ repeatMasking=none	1.47909
hg19_snp151Common_rs16906306 range=chr12:30518098-30518116 5'pad=9 3'pad=9 strand=+ repeatMasking=none	-1.83556
hg19_snp151Common_rs11832986 range=chr12:30546624-30546642 5'pad=9 3'pad=9 strand=+ repeatMasking=none	2.43879
hg19_snp151Common_rs34256685 range=chr12:30611508-30611526 5'pad=9 3'pad=9 strand=+ repeatMasking=none	-2.10297
hg19_snp151Common_rs59222301 range=chr12:30626020-30626038 5'pad=9 3'pad=9 strand=+ repeatMasking=none	-0.80326
hg19_snp151Common_rs11532276 range=chr12:30758565-30758583 5'pad=9 3'pad=9 strand=+ repeatMasking=none	-3.42802
hg19_snp151Common_rs73088047 range=chr12:31102766-31102784 5'pad=9 3'pad=9 strand=+ repeatMasking=none	0.040821
hg19_snp151Common_rs10771791 range=chr12:31171554-31171572 5'pad=9 3'pad=9 strand=+ repeatMasking=none	0.253367
hg19_snp151Common_rs10771798 range=chr12:31223313-31223331 5'pad=9 3'pad=9 strand=+ repeatMasking=none	-0.510766
hg19_snp151Common_rs4081649 range=chr12:31242223-31242241 5'pad=9 3'pad=9 strand=+ repeatMasking=none	-1.81037
hg19_snp151Common_rs28460499 range=chr12:31284242-31284260 5'pad=9 3'pad=9 strand=+ repeatMasking=none	3.19874
hg19_snp151Common_rs4931481 range=chr12:31503743-31503761 5'pad=9 3'pad=9 strand=+ repeatMasking=none	2.37896
hg19_snp151Common_rs144107679 range=chr12:31955679-31955697 5'pad=9 3'pad=9 strand=+ repeatMasking=none	0.122941
hg19_snp151Common_rs141482833 range=chr12:32179353-32179371 5'pad=9 3'pad=9 strand=+ repeatMasking=none	-0.141318
hg19_snp151Common_rs2668290 range=chr12:32281195-32281213 5'pad=9 3'pad=9 strand=- repeatMasking=none	-0.404378
hg19_snp151Common_rs111936901 range=chr12:32342903-32342921 5'pad=9 3'pad=9 strand=+ repeatMasking=none	2.68551
hg19_snp151Common_rs16919774 range=chr12:32502496-32502514 5'pad=9 3'pad=9 strand=+ repeatMasking=none	-0.679597
hg19_snp151Common_rs190853580 range=chr12:32626243-32626261 5'pad=9 3'pad=9 strand=+ repeatMasking=none	1.70106
hg19_snp151Common_rs74073064 range=chr12:32821170-32821188 5'pad=9 3'pad=9 strand=+ repeatMasking=none	-0.346251
hg19_snp151Common_rs141040674 range=chr12:32935038-32935056 5'pad=9 3'pad=9 strand=+ repeatMasking=none	0.930734
hg19_snp151Common_rs56033839 range=chr12:32970111-32970129 5'pad=9 3'pad=9 strand=+ repeatMasking=none	-0.485805
hg19_snp151Common_rs143525894 range=chr12:32994252-32994269 5'pad=9 3'pad=9 strand=+ repeatMasking=none	0.230442
hg19_snp151Common_rs11052297 range=chr12:33063489-33063507 5'pad=9 3'pad=9 strand=+ repeatMasking=none	-0.096164
hg19_snp151Common_rs17622297 range=chr12:33086173-33086191 5'pad=9 3'pad=9 strand=+ repeatMasking=none	1.08488
hg19_snp151Common_rs61927344 range=chr12:33109008-33109026 5'pad=9 3'pad=9 strand=+ repeatMasking=none	-1.19034
hg19_snp151Common_rs59411863 range=chr12:33280841-33280859 5'pad=9 3'pad=9 strand=+ repeatMasking=none	1.89207
hg19_snp151Common_rs538680885 range=chr12:33417398-33417416 5'pad=9 3'pad=9 strand=+ repeatMasking=none	-1.99307
hg19_snp151Common_rs11052707 range=chr12:33589379-33589397 5'pad=9 3'pad=9 strand=+ repeatMasking=none	1.68289
hg19_snp151Common_rs7296424 range=chr12:33809888-33809906 5'pad=9 3'pad=9 strand=+ repeatMasking=none	-1.42983
hg19_snp151Common_rs58102497 range=chr12:33816124-33816142 5'pad=9 3'pad=9 strand=+ repeatMasking=none	-0.396079
hg19_snp151Common_rs78877795 range=chr12:33922763-33922781 5'pad=9 3'pad=9 strand=+ repeatMasking=none	2.08394
hg19_snp151Common_rs7979535 range=chr12:33947441-33947459 5'pad=9 3'pad=9 strand=+ repeatMasking=none	-0.273684
hg19_snp151Common_rs144475405 range=chr12:33954061-33954079 5'pad=9 3'pad=9 strand=+ repeatMasking=none	-2.13053
hg19_snp151Common_rs116496642 range=chr12:34037073-34037091 5'pad=9 3'pad=9 strand=+ repeatMasking=none	0.247497
hg19_snp151Common_rs73107038 range=chr12:34143882-34143900 5'pad=9 3'pad=9 strand=+ repeatMasking=none	1.5917
hg19_snp151Common_rs1844522 range=chr12:34169833-34169851 5'pad=9 3'pad=9 strand=- repeatMasking=none	-1.85025
hg19_snp151Common_rs7358760 range=chr12:34207754-34207772 5'pad=9 3'pad=9 strand=+ repeatMasking=none	0.429789
hg19_snp151Common_rs60199963 range=chr12:34449368-34449386 5'pad=9 3'pad=9 strand=+ repeatMasking=none	-0.44353
hg19_snp151Common_rs138899343 range=chr12:34512069-34512086 5'pad=9 3'pad=9 strand=+ repeatMasking=none	-0.10467
hg19_snp151Common_rs35652542 range=chr12:34828279-34828297 5'pad=9 3'pad=9 strand=+ repeatMasking=none	-1.74227
hg19_snp151Common_rs139958340 range=chr12:37908241-37908259 5'pad=9 3'pad=9 strand=+ repeatMasking=none	0.461814
hg19_snp151Common_rs36104601 range=chr12:37939601-37939619 5'pad=9 3'pad=9 strand=+ repeatMasking=none	-0.966179
hg19_snp151Common_rs115189038 range=chr12:37981165-37981183 5'pad=9 3'pad=9 strand=+ repeatMasking=none	0.98654
hg19_snp151Common_rs8189520 range=chr12:38033621-38033639 5'pad=9 3'pad=9 strand=+ repeatMasking=none	2.02764
hg19_snp151Common_rs550448004 range=chr12:38057565-38057583 5'pad=9 3'pad=9 strand=+ repeatMasking=none	-0.197114
hg19_snp151Common_rs561673537 range=chr12:38096103-38096121 5'pad=9 3'pad=9 strand=+ repeatMasking=none	1.69762
hg19_snp151Common_rs28874015 range=chr12:38153467-38153485 5'pad=9 3'pad=9 strand=+ repeatMasking=none	2.59798
hg19_snp151Common_rs11532421 range=chr12:38287641-38287659 5'pad=9 3'pad=9 strand=+ repeatMasking=none	1.31644
hg19_snp151Common_rs117424599 range=chr12:38297250-38297268 5'pad=9 3'pad=9 strand=+ repeatMasking=none	-2.24618
hg19_snp151Common_rs11181635 range=chr12:38378411-38378429 5'pad=9 3'pad=9 strand=+ repeatMasking=none	-1.78595
hg19_snp151Common_rs541070680 range=chr12:38378852-38378870 5'pad=9 3'pad=9 strand=+ repeatMasking=none	-2.12684
hg19_snp151Common_rs74422625 range=chr12:38418277-38418295 5'pad=9 3'pad=9 strand=+ repeatMasking=none	1.33456
hg19_snp151Common_rs56880015 range=chr12:38439160-38439178 5'pad=9 3'pad=9 strand=+ repeatMasking=none	-0.665044
hg19_snp151Common_rs371142939 range=chr12:38466918-38466936 5'pad=9 3'pad=9 strand=+ repeatMasking=none	-0.104495
hg19_snp151Common_rs116007999 range=chr12:38477626-38477644 5'pad=9 3'pad=9 strand=+ repeatMasking=none	-0.29123
hg19_snp151Common_rs74082057 range=chr12:38479032-38479050 5'pad=9 3'pad=9 strand=+ repeatMasking=none	2.42821
hg19_snp151Common_rs11495407 range=chr12:38488324-38488342 5'pad=9 3'pad=9 strand=+ repeatMasking=none	3.21988
hg19_snp151Common_rs114101962 range=chr12:38640273-38640291 5'pad=9 3'pad=9 strand=+ repeatMasking=none	1.07425
hg19_snp151Common_rs10880978 range=chr12:38761798-38761816 5'pad=9 3'pad=9 strand=+ repeatMasking=none	0.955944
hg19_snp151Common_rs111757450 range=chr12:38805040-38805058 5'pad=9 3'pad=9 strand=+ repeatMasking=none	-0.158526
hg19_snp151Common_rs139184221 range=chr12:38893833-38893851 5'pad=9 3'pad=9 strand=+ repeatMasking=none	-0.03072
hg19_snp151Common_rs115338491 range=chr12:39163045-39163063 5'pad=9 3'pad=9 strand=+ repeatMasking=none	3.38624
hg19_snp151Common_rs113139611 range=chr12:39341403-39341421 5'pad=9 3'pad=9 strand=+ repeatMasking=none	-0.185422
hg19_snp151Common_rs74797339 range=chr12:39508043-39508061 5'pad=9 3'pad=9 strand=+ repeatMasking=none	0.551898
hg19_snp151Common_rs77115887 range=chr12:39723960-39723978 5'pad=9 3'pad=9 strand=+ repeatMasking=none	1.49189
hg19_snp151Common_rs77485456 range=chr12:39903463-39903481 5'pad=9 3'pad=9 strand=+ repeatMasking=none	-0.223911
hg19_snp151Common_rs4556618 range=chr12:40145697-40145715 5'pad=9 3'pad=9 strand=+ repeatMasking=none	-1.33064
hg19_snp151Common_rs75429034 range=chr12:40191596-40191614 5'pad=9 3'pad=9 strand=+ repeatMasking=none	3.40427
hg19_snp151Common_rs2638240 range=chr12:40576108-40576126 5'pad=9 3'pad=9 strand=- repeatMasking=none	-0.282942
hg19_snp151Common_rs115686271 range=chr12:40639034-40639052 5'pad=9 3'pad=9 strand=+ repeatMasking=none	2.11287
hg19_snp151Common_rs17484493 range=chr12:40740864-40740882 5'pad=9 3'pad=9 strand=+ repeatMasking=none	0.139204
hg19_snp151Common_rs2896981 range=chr12:40781575-40781593 5'pad=9 3'pad=9 strand=+ repeatMasking=none	-1.32067
hg19_snp151Common_rs17128229 range=chr12:40846628-40846646 5'pad=9 3'pad=9 strand=+ repeatMasking=none	0.785169
hg19_snp151Common_rs7137967 range=chr12:41136770-41136788 5'pad=9 3'pad=9 strand=+ repeatMasking=none	-1.54157
hg19_snp151Common_rs7133020 range=chr12:41169862-41169880 5'pad=9 3'pad=9 strand=+ repeatMasking=none	-0.045737
hg19_snp151Common_rs10879395 range=chr12:41340443-41340461 5'pad=9 3'pad=9 strand=+ repeatMasking=none	-1.29814
hg19_snp151Common_rs9669430 range=chr12:41479995-41480013 5'pad=9 3'pad=9 strand=+ repeatMasking=none	1.17747
hg19_snp151Common_rs1431103 range=chr12:41590487-41590505 5'pad=9 3'pad=9 strand=+ repeatMasking=none	2.9234
hg19_snp151Common_rs1346905 range=chr12:41594167-41594185 5'pad=9 3'pad=9 strand=+ repeatMasking=none	1.51071
hg19_snp151Common_rs7486754 range=chr12:41663187-41663205 5'pad=9 3'pad=9 strand=+ repeatMasking=none	3.84345
hg19_snp151Common_rs117645253 range=chr12:41715552-41715570 5'pad=9 3'pad=9 strand=+ repeatMasking=none	0.147056
hg19_snp151Common_rs35766123 range=chr12:41807013-41807031 5'pad=9 3'pad=9 strand=+ repeatMasking=none	-0.430226
hg19_snp151Common_rs10880091 range=chr12:41916877-41916895 5'pad=9 3'pad=9 strand=+ repeatMasking=none	-1.11188
hg19_snp151Common_rs11181039 range=chr12:41992487-41992505 5'pad=9 3'pad=9 strand=+ repeatMasking=none	-1.59877
hg19_snp151Common_rs73120242 range=chr12:42026416-42026434 5'pad=9 3'pad=9 strand=+ repeatMasking=none	-0.230876
hg19_snp151Common_rs80350470 range=chr12:42219937-42219955 5'pad=9 3'pad=9 strand=+ repeatMasking=none	1.91944
hg19_snp151Common_rs11181258 range=chr12:42331423-42331441 5'pad=9 3'pad=9 strand=+ repeatMasking=none	-0.489345
hg19_snp151Common_rs74684108 range=chr12:42471826-42471844 5'pad=9 3'pad=9 strand=+ repeatMasking=none	-0.093396
hg19_snp151Common_rs73131138 range=chr12:42579714-42579732 5'pad=9 3'pad=9 strand=+ repeatMasking=none	0.362443
hg19_snp151Common_rs7972281 range=chr12:43022421-43022439 5'pad=9 3'pad=9 strand=+ repeatMasking=none	0.578948
hg19_snp151Common_rs9804781 range=chr12:43107293-43107311 5'pad=9 3'pad=9 strand=+ repeatMasking=none	-0.84835
hg19_snp151Common_rs2678146 range=chr12:43177671-43177689 5'pad=9 3'pad=9 strand=- repeatMasking=none	-1.05752
hg19_snp151Common_rs12227246 range=chr12:43223261-43223279 5'pad=9 3'pad=9 strand=+ repeatMasking=none	0.04069
hg19_snp151Common_rs375013614 range=chr12:43396441-43396459 5'pad=9 3'pad=9 strand=+ repeatMasking=none	-1.22972
hg19_snp151Common_rs141380023 range=chr12:44217364-44217382 5'pad=9 3'pad=9 strand=+ repeatMasking=none	-0.138142
hg19_snp151Common_rs113400697 range=chr12:44348748-44348766 5'pad=9 3'pad=9 strand=+ repeatMasking=none	-1.71816
hg19_snp151Common_rs113254957 range=chr12:44372729-44372747 5'pad=9 3'pad=9 strand=+ repeatMasking=none	3.48988
hg19_snp151Common_rs77838534 range=chr12:44582707-44582725 5'pad=9 3'pad=9 strand=+ repeatMasking=none	0.468904
hg19_snp151Common_rs111724364 range=chr12:44688360-44688378 5'pad=9 3'pad=9 strand=+ repeatMasking=none	-1.90042
hg19_snp151Common_rs1873980 range=chr12:44802374-44802392 5'pad=9 3'pad=9 strand=- repeatMasking=none	-1.886
hg19_snp151Common_rs59907388 range=chr12:44860631-44860649 5'pad=9 3'pad=9 strand=+ repeatMasking=none	-0.816845
hg19_snp151Common_rs61391734 range=chr12:44950896-44950914 5'pad=9 3'pad=9 strand=+ repeatMasking=none	-1.72332
hg19_snp151Common_rs57061175 range=chr12:45183184-45183202 5'pad=9 3'pad=9 strand=+ repeatMasking=none	0.809531
hg19_snp151Common_rs11182708 range=chr12:45228685-45228703 5'pad=9 3'pad=9 strand=+ repeatMasking=none	1.34008
hg19_snp151Common_rs375660 range=chr12:45337338-45337356 5'pad=9 3'pad=9 strand=+ repeatMasking=none	1.16679
hg19_snp151Common_rs77876702 range=chr12:45495163-45495181 5'pad=9 3'pad=9 strand=+ repeatMasking=none	-2.00526
hg19_snp151Common_rs10785548 range=chr12:45511011-45511029 5'pad=9 3'pad=9 strand=+ repeatMasking=none	0.460475
hg19_snp151Common_rs12306299 range=chr12:45554285-45554303 5'pad=9 3'pad=9 strand=+ repeatMasking=none	-1.76855
hg19_snp151Common_rs149909526 range=chr12:45842479-45842497 5'pad=9 3'pad=9 strand=+ repeatMasking=none	0.147952
hg19_snp151Common_rs10880864 range=chr12:46261292-46261310 5'pad=9 3'pad=9 strand=+ repeatMasking=none	1.68592
hg19_snp151Common_rs7315213 range=chr12:46482716-46482734 5'pad=9 3'pad=9 strand=+ repeatMasking=none	1.24216
hg19_snp151Common_rs116845314 range=chr12:46490709-46490727 5'pad=9 3'pad=9 strand=+ repeatMasking=none	-1.35651
hg19_snp151Common_rs1045278 range=chr12:46582531-46582549 5'pad=9 3'pad=9 strand=- repeatMasking=none	1.56504
hg19_snp151Common_rs2471588 range=chr12:46926179-46926197 5'pad=9 3'pad=9 strand=- repeatMasking=none	1.92121
hg19_snp151Common_rs2257215 range=chr12:46942985-46943003 5'pad=9 3'pad=9 strand=+ repeatMasking=none	-0.534346
hg19_snp151Common_rs4533116 range=chr12:47226552-47226570 5'pad=9 3'pad=9 strand=+ repeatMasking=none	0.931142
hg19_snp151Common_rs2715778 range=chr12:47239023-47239041 5'pad=9 3'pad=9 strand=+ repeatMasking=none	-1.45601
hg19_snp151Common_rs61927723 range=chr12:47597974-47597992 5'pad=9 3'pad=9 strand=+ repeatMasking=none	-1.01013
hg19_snp151Common_rs1101809 range=chr12:47648659-47648677 5'pad=9 3'pad=9 strand=+ repeatMasking=none	0.007491
hg19_snp151Common_rs2905498 range=chr12:47848649-47848667 5'pad=9 3'pad=9 strand=+ repeatMasking=none	-0.941229
hg19_snp151Common_rs61918089 range=chr12:47923387-47923405 5'pad=9 3'pad=9 strand=+ repeatMasking=none	-1.88462
hg19_snp151Common_rs11307316 range=chr12:47963506-47963524 5'pad=9 3'pad=9 strand=+ repeatMasking=none	0.510351
hg19_snp151Common_rs76798446 range=chr12:48090576-48090594 5'pad=9 3'pad=9 strand=+ repeatMasking=none	2.01902
hg19_snp151Common_rs929269 range=chr12:48114752-48114770 5'pad=9 3'pad=9 strand=- repeatMasking=none	1.22576
hg19_snp151Common_rs61917655 range=chr12:48210778-48210796 5'pad=9 3'pad=9 strand=+ repeatMasking=none	-0.0127
hg19_snp151Common_rs1544410 range=chr12:48239826-48239844 5'pad=9 3'pad=9 strand=- repeatMasking=none	1.67275
hg19_snp151Common_rs2238135 range=chr12:48278181-48278199 5'pad=9 3'pad=9 strand=- repeatMasking=none	0.979474
hg19_snp151Common_rs10875722 range=chr12:48413625-48413643 5'pad=9 3'pad=9 strand=+ repeatMasking=none	-1.07329
hg19_snp151Common_rs61750873 range=chr12:48478993-48479011 5'pad=9 3'pad=9 strand=+ repeatMasking=none	0.814922
hg19_snp151Common_rs118112324 range=chr12:48493069-48493087 5'pad=9 3'pad=9 strand=+ repeatMasking=none	-1.64487
hg19_snp151Common_rs77844502 range=chr12:48638332-48638350 5'pad=9 3'pad=9 strand=+ repeatMasking=none	0.152448
hg19_snp151Common_rs2956710 range=chr12:48644801-48644819 5'pad=9 3'pad=9 strand=- repeatMasking=none	-0.776589
hg19_snp151Common_rs17825013 range=chr12:48702816-48702834 5'pad=9 3'pad=9 strand=+ repeatMasking=none	1.18691
hg19_snp151Common_rs11541302 range=chr12:48765029-48765047 5'pad=9 3'pad=9 strand=+ repeatMasking=none	0.618245
hg19_snp151Common_rs61942820 range=chr12:48824123-48824141 5'pad=9 3'pad=9 strand=+ repeatMasking=none	0.047895
hg19_snp151Common_rs79263537 range=chr12:49314908-49314926 5'pad=9 3'pad=9 strand=+ repeatMasking=none	2.01446
hg19_snp151Common_rs112748719 range=chr12:49857484-49857502 5'pad=9 3'pad=9 strand=+ repeatMasking=none	-0.150568
hg19_snp151Common_rs2358539 range=chr12:50619609-50619627 5'pad=9 3'pad=9 strand=+ repeatMasking=none	0.243738
hg19_snp151Common_rs11169368 range=chr12:50699031-50699049 5'pad=9 3'pad=9 strand=+ repeatMasking=none	0.9492
hg19_snp151Common_rs118171382 range=chr12:50931214-50931232 5'pad=9 3'pad=9 strand=+ repeatMasking=none	0.164976
hg19_snp151Common_rs140363871 range=chr12:51266390-51266408 5'pad=9 3'pad=9 strand=+ repeatMasking=none	-2.09687
hg19_snp151Common_rs2730647 range=chr12:51554817-51554835 5'pad=9 3'pad=9 strand=+ repeatMasking=none	-1.07356
hg19_snp151Common_rs112648976 range=chr12:51555246-51555264 5'pad=9 3'pad=9 strand=+ repeatMasking=none	-1.33797
hg19_snp151Common_rs11441886 range=chr12:51646611-51646628 5'pad=9 3'pad=9 strand=+ repeatMasking=none	1.15094
hg19_snp151Common_rs6580848 range=chr12:52263893-52263911 5'pad=9 3'pad=9 strand=+ repeatMasking=none	-1.41891
hg19_snp151Common_rs873438 range=chr12:52267141-52267159 5'pad=9 3'pad=9 strand=- repeatMasking=none	-0.649427
hg19_snp151Common_rs2859593 range=chr12:52326947-52326965 5'pad=9 3'pad=9 strand=- repeatMasking=none	-2.44219
hg19_snp151Common_rs148266858 range=chr12:52373071-52373089 5'pad=9 3'pad=9 strand=+ repeatMasking=none	1.17623
hg19_snp151Common_rs111450533 range=chr12:52410716-52410734 5'pad=9 3'pad=9 strand=+ repeatMasking=none	1.27464
hg19_snp151Common_rs150221111 range=chr12:52505538-52505556 5'pad=9 3'pad=9 strand=+ repeatMasking=none	-0.468048
hg19_snp151Common_rs149098810 range=chr12:52509621-52509639 5'pad=9 3'pad=9 strand=+ repeatMasking=none	2.62939
hg19_snp151Common_rs10219512 range=chr12:52537632-52537650 5'pad=9 3'pad=9 strand=+ repeatMasking=none	0.421397
hg19_snp151Common_rs78487129 range=chr12:52572892-52572910 5'pad=9 3'pad=9 strand=+ repeatMasking=none	0.010094
hg19_snp151Common_rs2286996 range=chr12:52647794-52647812 5'pad=9 3'pad=9 strand=- repeatMasking=none	0.81671
hg19_snp151Common_rs2293638 range=chr12:52820235-52820253 5'pad=9 3'pad=9 strand=- repeatMasking=none	-2.97143
hg19_snp151Common_rs2232380 range=chr12:52828297-52828315 5'pad=9 3'pad=9 strand=- repeatMasking=none	1.21679
hg19_snp151Common_rs10876370 range=chr12:53248075-53248093 5'pad=9 3'pad=9 strand=+ repeatMasking=none	-0.057577
hg19_snp151Common_rs2682306 range=chr12:53270398-53270416 5'pad=9 3'pad=9 strand=- repeatMasking=none	-1.80104
hg19_snp151Common_rs116661089 range=chr12:53367579-53367597 5'pad=9 3'pad=9 strand=+ repeatMasking=none	0.7459
hg19_snp151Common_rs17123172 range=chr12:53494379-53494397 5'pad=9 3'pad=9 strand=+ repeatMasking=none	2.20616
hg19_snp151Common_rs139314301 range=chr12:53506055-53506073 5'pad=9 3'pad=9 strand=+ repeatMasking=none	0.212463
hg19_snp151Common_rs151308533 range=chr12:53760258-53760276 5'pad=9 3'pad=9 strand=+ repeatMasking=none	1.90724
hg19_snp151Common_rs11834879 range=chr12:54555150-54555168 5'pad=9 3'pad=9 strand=+ repeatMasking=none	1.47082
hg19_snp151Common_rs116463597 range=chr12:54652429-54652447 5'pad=9 3'pad=9 strand=+ repeatMasking=none	-0.660654
hg19_snp151Common_rs3840781 range=chr12:54758354-54758372 5'pad=9 3'pad=9 strand=- repeatMasking=none	-0.799114
hg19_snp151Common_rs12296181 range=chr12:54794232-54794250 5'pad=9 3'pad=9 strand=+ repeatMasking=none	0.858796
hg19_snp151Common_rs61923480 range=chr12:54884193-54884211 5'pad=9 3'pad=9 strand=+ repeatMasking=none	2.54934
hg19_snp151Common_rs1249950 range=chr12:54970445-54970463 5'pad=9 3'pad=9 strand=+ repeatMasking=none	-0.972399
hg19_snp151Common_rs57280187 range=chr12:55125143-55125161 5'pad=9 3'pad=9 strand=+ repeatMasking=none	-3.80979
hg19_snp151Common_rs2633413 range=chr12:55432117-55432135 5'pad=9 3'pad=9 strand=- repeatMasking=none	0.34015
hg19_snp151Common_rs11171286 range=chr12:55513306-55513324 5'pad=9 3'pad=9 strand=+ repeatMasking=none	4.1223
hg19_snp151Common_rs10876715 range=chr12:55532159-55532177 5'pad=9 3'pad=9 strand=+ repeatMasking=none	-1.21412
hg19_snp151Common_rs144430839 range=chr12:55550387-55550405 5'pad=9 3'pad=9 strand=+ repeatMasking=none	-2.06704
hg19_snp151Common_rs7960409 range=chr12:55898503-55898521 5'pad=9 3'pad=9 strand=+ repeatMasking=none	-2.46155
hg19_snp151Common_rs11835716 range=chr12:55945249-55945267 5'pad=9 3'pad=9 strand=+ repeatMasking=none	-1.92714
hg19_snp151Common_rs117270945 range=chr12:55982277-55982295 5'pad=9 3'pad=9 strand=+ repeatMasking=none	3.40797
hg19_snp151Common_rs79135614 range=chr12:56071308-56071326 5'pad=9 3'pad=9 strand=+ repeatMasking=none	-0.621678
hg19_snp151Common_rs12320309 range=chr12:56273564-56273582 5'pad=9 3'pad=9 strand=+ repeatMasking=none	3.78234
hg19_snp151Common_rs7309340 range=chr12:56454562-56454580 5'pad=9 3'pad=9 strand=+ repeatMasking=none	-2.53623
hg19_snp151Common_rs1274494 range=chr12:56618089-56618107 5'pad=9 3'pad=9 strand=- repeatMasking=none	0.522824
hg19_snp151Common_rs17118431 range=chr12:56667091-56667109 5'pad=9 3'pad=9 strand=+ repeatMasking=none	0.869334
hg19_snp151Common_rs11575229 range=chr12:56750728-56750746 5'pad=9 3'pad=9 strand=- repeatMasking=none	0.177241
hg19_snp151Common_rs1903370 range=chr12:57206675-57206693 5'pad=9 3'pad=9 strand=- repeatMasking=none	-1.7878
hg19_snp151Common_rs80121216 range=chr12:57253289-57253307 5'pad=9 3'pad=9 strand=+ repeatMasking=none	-0.509554
hg19_snp151Common_rs2888107 range=chr12:57301385-57301403 5'pad=9 3'pad=9 strand=- repeatMasking=none	1.55348
hg19_snp151Common_rs12814239 range=chr12:57569469-57569487 5'pad=9 3'pad=9 strand=+ repeatMasking=none	1.04598
hg19_snp151Common_rs377330434 range=chr12:57853945-57853963 5'pad=9 3'pad=9 strand=+ repeatMasking=none	-0.406118
hg19_snp151Common_rs4760255 range=chr12:57855171-57855189 5'pad=9 3'pad=9 strand=+ repeatMasking=none	0.99456
hg19_snp151Common_rs541869 range=chr12:57878112-57878130 5'pad=9 3'pad=9 strand=+ repeatMasking=none	-2.8825
hg19_snp151Common_rs7973639 range=chr12:57985420-57985438 5'pad=9 3'pad=9 strand=+ repeatMasking=none	-0.11653
hg19_snp151Common_rs117839344 range=chr12:58183627-58183645 5'pad=9 3'pad=9 strand=+ repeatMasking=none	0.231692
hg19_snp151Common_rs368571344 range=chr12:58240326-58240344 5'pad=9 3'pad=9 strand=+ repeatMasking=none	-1.00442
hg19_snp151Common_rs3933982 range=chr12:58382088-58382106 5'pad=9 3'pad=9 strand=- repeatMasking=none	1.28673
hg19_snp151Common_rs73337720 range=chr12:58406070-58406088 5'pad=9 3'pad=9 strand=+ repeatMasking=none	0.063847
hg19_snp151Common_rs55889877 range=chr12:58882803-58882821 5'pad=9 3'pad=9 strand=+ repeatMasking=none	-0.128988
hg19_snp151Common_rs4760231 range=chr12:58934593-58934611 5'pad=9 3'pad=9 strand=+ repeatMasking=none	1.68898
hg19_snp151Common_rs12813656 range=chr12:58940643-58940661 5'pad=9 3'pad=9 strand=+ repeatMasking=none	-0.694961
hg19_snp151Common_rs1378821 range=chr12:59082258-59082276 5'pad=9 3'pad=9 strand=- repeatMasking=none	-0.459305
hg19_snp151Common_rs17121387 range=chr12:59138627-59138645 5'pad=9 3'pad=9 strand=+ repeatMasking=none	0.319247
hg19_snp151Common_rs78636501 range=chr12:59229650-59229668 5'pad=9 3'pad=9 strand=+ repeatMasking=none	1.05269
hg19_snp151Common_rs148228830 range=chr12:59246179-59246197 5'pad=9 3'pad=9 strand=+ repeatMasking=none	2.20582
hg19_snp151Common_rs78361319 range=chr12:59254180-59254198 5'pad=9 3'pad=9 strand=+ repeatMasking=none	2.53688
hg19_snp151Common_rs146632796 range=chr12:59330183-59330200 5'pad=9 3'pad=9 strand=+ repeatMasking=none	1.43879
hg19_snp151Common_rs78489497 range=chr12:59379889-59379907 5'pad=9 3'pad=9 strand=+ repeatMasking=none	0.125442
hg19_snp151Common_rs11172880 range=chr12:59428658-59428676 5'pad=9 3'pad=9 strand=+ repeatMasking=none	-0.393461
hg19_snp151Common_rs112786335 range=chr12:59499685-59499703 5'pad=9 3'pad=9 strand=+ repeatMasking=none	2.02206
hg19_snp151Common_rs75955779 range=chr12:59762619-59762637 5'pad=9 3'pad=9 strand=+ repeatMasking=none	-1.2424
hg19_snp151Common_rs116119946 range=chr12:59942162-59942180 5'pad=9 3'pad=9 strand=+ repeatMasking=none	-0.474766
hg19_snp151Common_rs55869967 range=chr12:60171665-60171683 5'pad=9 3'pad=9 strand=+ repeatMasking=none	2.41666
hg19_snp151Common_rs4439553 range=chr12:60199756-60199774 5'pad=9 3'pad=9 strand=+ repeatMasking=none	0.885319
hg19_snp151Common_rs12321091 range=chr12:60535220-60535238 5'pad=9 3'pad=9 strand=+ repeatMasking=none	-4.9693
hg19_snp151Common_rs2134886 range=chr12:60785059-60785077 5'pad=9 3'pad=9 strand=+ repeatMasking=none	0.60677
hg19_snp151Common_rs544627563 range=chr12:60931998-60932015 5'pad=9 3'pad=9 strand=+ repeatMasking=none	0.088861
hg19_snp151Common_rs80209850 range=chr12:61113689-61113707 5'pad=9 3'pad=9 strand=+ repeatMasking=none	-2.68712
hg19_snp151Common_rs114651986 range=chr12:61214025-61214043 5'pad=9 3'pad=9 strand=+ repeatMasking=none	-0.983079
hg19_snp151Common_rs7306016 range=chr12:61417643-61417661 5'pad=9 3'pad=9 strand=+ repeatMasking=none	-0.664413
hg19_snp151Common_rs10747908 range=chr12:61486603-61486621 5'pad=9 3'pad=9 strand=+ repeatMasking=none	0.589573
hg19_snp151Common_rs2731403 range=chr12:61708422-61708440 5'pad=9 3'pad=9 strand=+ repeatMasking=none	3.82701
hg19_snp151Common_rs12371435 range=chr12:61787849-61787867 5'pad=9 3'pad=9 strand=+ repeatMasking=none	-0.3133
hg19_snp151Common_rs4283055 range=chr12:61796649-61796667 5'pad=9 3'pad=9 strand=+ repeatMasking=none	-0.967217
hg19_snp151Common_rs1869401 range=chr12:62013694-62013712 5'pad=9 3'pad=9 strand=+ repeatMasking=none	1.36824
hg19_snp151Common_rs1506847 range=chr12:62081161-62081179 5'pad=9 3'pad=9 strand=+ repeatMasking=none	-0.938204
hg19_snp151Common_rs115627145 range=chr12:62140621-62140639 5'pad=9 3'pad=9 strand=+ repeatMasking=none	0.784877
hg19_snp151Common_rs7965138 range=chr12:62301552-62301570 5'pad=9 3'pad=9 strand=+ repeatMasking=none	3.00232
hg19_snp151Common_rs66467365 range=chr12:62498049-62498067 5'pad=9 3'pad=9 strand=- repeatMasking=none	0.239721
hg19_snp151Common_rs34320621 range=chr12:62526892-62526910 5'pad=9 3'pad=9 strand=+ repeatMasking=none	-1.22139
hg19_snp151Common_rs115441909 range=chr12:62553417-62553435 5'pad=9 3'pad=9 strand=+ repeatMasking=none	2.04106
hg19_snp151Common_rs17717265 range=chr12:62765568-62765586 5'pad=9 3'pad=9 strand=+ repeatMasking=none	0.251179
hg19_snp151Common_rs342165 range=chr12:63081260-63081278 5'pad=9 3'pad=9 strand=+ repeatMasking=none	-1.92553
hg19_snp151Common_rs1146112 range=chr12:63703119-63703137 5'pad=9 3'pad=9 strand=- repeatMasking=none	-0.870992
hg19_snp151Common_rs489614 range=chr12:63819320-63819338 5'pad=9 3'pad=9 strand=- repeatMasking=none	0.029287
hg19_snp151Common_rs58579188 range=chr12:63983907-63983925 5'pad=9 3'pad=9 strand=+ repeatMasking=none	-2.0379
hg19_snp151Common_rs12317994 range=chr12:64137142-64137160 5'pad=9 3'pad=9 strand=+ repeatMasking=none	2.20881
hg19_snp151Common_rs4762999 range=chr12:64197771-64197789 5'pad=9 3'pad=9 strand=+ repeatMasking=none	3.35731
hg19_snp151Common_rs73313436 range=chr12:64215187-64215205 5'pad=9 3'pad=9 strand=+ repeatMasking=none	-1.02059
hg19_snp151Common_rs11614289 range=chr12:64231667-64231685 5'pad=9 3'pad=9 strand=+ repeatMasking=none	-1.47877
hg19_snp151Common_rs4553444 range=chr12:64433436-64433454 5'pad=9 3'pad=9 strand=+ repeatMasking=none	-0.769069
hg19_snp151Common_rs789738 range=chr12:64536000-64536018 5'pad=9 3'pad=9 strand=- repeatMasking=none	-0.40034
hg19_snp151Common_rs12581905 range=chr12:64678407-64678425 5'pad=9 3'pad=9 strand=+ repeatMasking=none	1.05578
hg19_snp151Common_rs142617537 range=chr12:64761516-64761534 5'pad=9 3'pad=9 strand=+ repeatMasking=none	0.926863
hg19_snp151Common_rs75365483 range=chr12:64822746-64822764 5'pad=9 3'pad=9 strand=+ repeatMasking=none	-1.65123
hg19_snp151Common_rs115304675 range=chr12:64933321-64933339 5'pad=9 3'pad=9 strand=+ repeatMasking=none	0.846367
hg19_snp151Common_rs76569522 range=chr12:65010490-65010508 5'pad=9 3'pad=9 strand=+ repeatMasking=none	0.829926
hg19_snp151Common_rs1147091 range=chr12:65152157-65152175 5'pad=9 3'pad=9 strand=+ repeatMasking=none	-0.846887
hg19_snp151Common_rs11175555 range=chr12:65189012-65189030 5'pad=9 3'pad=9 strand=+ repeatMasking=none	1.53595
hg19_snp151Common_rs114268097 range=chr12:65200965-65200983 5'pad=9 3'pad=9 strand=+ repeatMasking=none	0.544174
hg19_snp151Common_rs144790595 range=chr12:65470096-65470114 5'pad=9 3'pad=9 strand=+ repeatMasking=none	2.21524
hg19_snp151Common_rs1344946 range=chr12:65764163-65764181 5'pad=9 3'pad=9 strand=- repeatMasking=none	0.496159
hg19_snp151Common_rs78229380 range=chr12:65893838-65893856 5'pad=9 3'pad=9 strand=+ repeatMasking=none	-0.65989
hg19_snp151Common_rs4129217 range=chr12:65958498-65958516 5'pad=9 3'pad=9 strand=+ repeatMasking=none	-1.88844
hg19_snp151Common_rs117772557 range=chr12:66074264-66074282 5'pad=9 3'pad=9 strand=+ repeatMasking=none	1.80541
hg19_snp151Common_rs1168746 range=chr12:66556760-66556778 5'pad=9 3'pad=9 strand=- repeatMasking=none	2.19379
hg19_snp151Common_rs12227179 range=chr12:66700264-66700282 5'pad=9 3'pad=9 strand=+ repeatMasking=none	0.330118
hg19_snp151Common_rs11176212 range=chr12:66870508-66870526 5'pad=9 3'pad=9 strand=+ repeatMasking=none	-0.490745
hg19_snp151Common_rs58850953 range=chr12:66935803-66935821 5'pad=9 3'pad=9 strand=+ repeatMasking=none	0.448176
hg19_snp151Common_rs192647813 range=chr12:67198207-67198225 5'pad=9 3'pad=9 strand=+ repeatMasking=none	-2.78891
hg19_snp151Common_rs143860251 range=chr12:67268252-67268270 5'pad=9 3'pad=9 strand=+ repeatMasking=none	-1.46388
hg19_snp151Common_rs12810857 range=chr12:67326629-67326647 5'pad=9 3'pad=9 strand=+ repeatMasking=none	-0.952203
hg19_snp151Common_rs537292136 range=chr12:67340557-67340575 5'pad=9 3'pad=9 strand=+ repeatMasking=none	-0.08715
hg19_snp151Common_rs10784610 range=chr12:67516453-67516471 5'pad=9 3'pad=9 strand=+ repeatMasking=none	-1.63281
hg19_snp151Common_rs9788138 range=chr12:67632500-67632518 5'pad=9 3'pad=9 strand=+ repeatMasking=none	-3.01281
hg19_snp151Common_rs59433028 range=chr12:67823831-67823849 5'pad=9 3'pad=9 strand=+ repeatMasking=none	1.13569
hg19_snp151Common_rs4630366 range=chr12:67963540-67963558 5'pad=9 3'pad=9 strand=+ repeatMasking=none	-1.2379
hg19_snp151Common_rs4913357 range=chr12:68090548-68090566 5'pad=9 3'pad=9 strand=+ repeatMasking=none	2.28315
hg19_snp151Common_rs9652024 range=chr12:68112896-68112914 5'pad=9 3'pad=9 strand=+ repeatMasking=none	0.203335
hg19_snp151Common_rs10784645 range=chr12:68115280-68115298 5'pad=9 3'pad=9 strand=+ repeatMasking=none	-1.09781
hg19_snp151Common_rs11176864 range=chr12:68167551-68167569 5'pad=9 3'pad=9 strand=+ repeatMasking=none	-2.32946
hg19_snp151Common_rs2190735 range=chr12:68369259-68369277 5'pad=9 3'pad=9 strand=+ repeatMasking=none	-1.12256
hg19_snp151Common_rs113673096 range=chr12:68702603-68702621 5'pad=9 3'pad=9 strand=+ repeatMasking=none	1.68564
hg19_snp151Common_rs73322521 range=chr12:68774235-68774253 5'pad=9 3'pad=9 strand=+ repeatMasking=none	-0.225381
hg19_snp151Common_rs630244 range=chr12:68786773-68786791 5'pad=9 3'pad=9 strand=- repeatMasking=none	-0.066786
hg19_snp151Common_rs10878839 range=chr12:68879920-68879938 5'pad=9 3'pad=9 strand=+ repeatMasking=none	0.245233
hg19_snp151Common_rs7965270 range=chr12:68991962-68991980 5'pad=9 3'pad=9 strand=+ repeatMasking=none	1.52055
hg19_snp151Common_rs141682684 range=chr12:69104824-69104842 5'pad=9 3'pad=9 strand=+ repeatMasking=none	-0.075444
hg19_snp151Common_rs73327646 range=chr12:69410200-69410218 5'pad=9 3'pad=9 strand=+ repeatMasking=none	-1.56687
hg19_snp151Common_rs61928703 range=chr12:69503367-69503385 5'pad=9 3'pad=9 strand=+ repeatMasking=none	2.7071
hg19_snp151Common_rs117033278 range=chr12:69529538-69529556 5'pad=9 3'pad=9 strand=+ repeatMasking=none	2.57322
hg19_snp151Common_rs78615550 range=chr12:69778369-69778387 5'pad=9 3'pad=9 strand=+ repeatMasking=none	0.796835
hg19_snp151Common_rs149250726 range=chr12:69880078-69880095 5'pad=9 3'pad=9 strand=+ repeatMasking=none	-0.121306
hg19_snp151Common_rs2588440 range=chr12:69971465-69971483 5'pad=9 3'pad=9 strand=+ repeatMasking=none	-0.813392
hg19_snp151Common_rs12424754 range=chr12:70196529-70196547 5'pad=9 3'pad=9 strand=+ repeatMasking=none	0.737806
hg19_snp151Common_rs61930195 range=chr12:70226271-70226289 5'pad=9 3'pad=9 strand=+ repeatMasking=none	-1.74887
hg19_snp151Common_rs6581910 range=chr12:70345619-70345637 5'pad=9 3'pad=9 strand=+ repeatMasking=none	0.618606
hg19_snp151Common_rs60836512 range=chr12:70387295-70387313 5'pad=9 3'pad=9 strand=+ repeatMasking=none	1.65607
hg19_snp151Common_rs710690 range=chr12:70449953-70449971 5'pad=9 3'pad=9 strand=+ repeatMasking=none	0.417214
hg19_snp151Common_rs76353021 range=chr12:70654173-70654191 5'pad=9 3'pad=9 strand=+ repeatMasking=none	-1.19347
hg19_snp151Common_rs4761135 range=chr12:70692180-70692198 5'pad=9 3'pad=9 strand=+ repeatMasking=none	-0.283783
hg19_snp151Common_rs12821702 range=chr12:70907761-70907779 5'pad=9 3'pad=9 strand=+ repeatMasking=none	-4.12775
hg19_snp151Common_rs79822877 range=chr12:71020961-71020979 5'pad=9 3'pad=9 strand=+ repeatMasking=none	-1.0858
hg19_snp151Common_rs118172494 range=chr12:71035337-71035355 5'pad=9 3'pad=9 strand=+ repeatMasking=none	2.35465
hg19_snp151Common_rs143984874 range=chr12:71047715-71047733 5'pad=9 3'pad=9 strand=+ repeatMasking=none	2.76494
hg19_snp151Common_rs59514806 range=chr12:71063272-71063290 5'pad=9 3'pad=9 strand=+ repeatMasking=none	0.283588
hg19_snp151Common_rs75681739 range=chr12:71074460-71074478 5'pad=9 3'pad=9 strand=+ repeatMasking=none	1.07916
hg19_snp151Common_rs147239858 range=chr12:71140681-71140699 5'pad=9 3'pad=9 strand=+ repeatMasking=none	0.051856
hg19_snp151Common_rs77868094 range=chr12:71277570-71277588 5'pad=9 3'pad=9 strand=+ repeatMasking=none	-0.52361
hg19_snp151Common_rs1512993 range=chr12:71401010-71401028 5'pad=9 3'pad=9 strand=+ repeatMasking=none	-1.5247
hg19_snp151Common_rs1913196 range=chr12:71418338-71418356 5'pad=9 3'pad=9 strand=+ repeatMasking=none	-0.149489
hg19_snp151Common_rs115022302 range=chr12:71598716-71598734 5'pad=9 3'pad=9 strand=+ repeatMasking=none	0.675373
hg19_snp151Common_rs6582078 range=chr12:72374882-72374900 5'pad=9 3'pad=9 strand=+ repeatMasking=none	0.892074
hg19_snp151Common_rs114736790 range=chr12:72438999-72439017 5'pad=9 3'pad=9 strand=+ repeatMasking=none	2.55493
hg19_snp151Common_rs3935113 range=chr12:72721824-72721842 5'pad=9 3'pad=9 strand=+ repeatMasking=none	1.66018
hg19_snp151Common_rs71071856 range=chr12:73215150-73215167 5'pad=9 3'pad=9 strand=+ repeatMasking=none	-0.234992
hg19_snp151Common_rs71950235 range=chr12:73285691-73285709 5'pad=9 3'pad=9 strand=+ repeatMasking=none	-0.050933
hg19_snp151Common_rs66813616 range=chr12:73628535-73628553 5'pad=9 3'pad=9 strand=+ repeatMasking=none	1.38574
hg19_snp151Common_rs138530940 range=chr12:73663833-73663851 5'pad=9 3'pad=9 strand=+ repeatMasking=none	1.83039
hg19_snp151Common_rs142848438 range=chr12:73703831-73703849 5'pad=9 3'pad=9 strand=+ repeatMasking=none	-0.901225
hg19_snp151Common_rs7311813 range=chr12:73714537-73714555 5'pad=9 3'pad=9 strand=+ repeatMasking=none	-0.144605
hg19_snp151Common_rs7965850 range=chr12:73787416-73787434 5'pad=9 3'pad=9 strand=+ repeatMasking=none	-0.605742
hg19_snp151Common_rs73177752 range=chr12:74034314-74034332 5'pad=9 3'pad=9 strand=+ repeatMasking=none	0.633249
hg19_snp151Common_rs141106574 range=chr12:74064122-74064139 5'pad=9 3'pad=9 strand=+ repeatMasking=none	-0.205701
hg19_snp151Common_rs7966438 range=chr12:74472377-74472395 5'pad=9 3'pad=9 strand=+ repeatMasking=none	0.713409
hg19_snp151Common_rs78981345 range=chr12:74529412-74529430 5'pad=9 3'pad=9 strand=+ repeatMasking=none	2.27654
hg19_snp151Common_rs78736553 range=chr12:74574211-74574229 5'pad=9 3'pad=9 strand=+ repeatMasking=none	-0.855238
hg19_snp151Common_rs6582215 range=chr12:74730605-74730623 5'pad=9 3'pad=9 strand=+ repeatMasking=none	-1.39499
hg19_snp151Common_rs117852288 range=chr12:74831689-74831707 5'pad=9 3'pad=9 strand=+ repeatMasking=none	2.00092
hg19_snp151Common_rs5799176 range=chr12:74999016-74999034 5'pad=9 3'pad=9 strand=+ repeatMasking=none	0.330267
hg19_snp151Common_rs78900509 range=chr12:75349322-75349340 5'pad=9 3'pad=9 strand=+ repeatMasking=none	0.35034
hg19_snp151Common_rs75826325 range=chr12:75583885-75583903 5'pad=9 3'pad=9 strand=+ repeatMasking=none	0.726162
hg19_snp151Common_rs1679376 range=chr12:75898464-75898482 5'pad=9 3'pad=9 strand=+ repeatMasking=none	-0.706332
hg19_snp151Common_rs114579250 range=chr12:75901547-75901565 5'pad=9 3'pad=9 strand=+ repeatMasking=none	1.79114
hg19_snp151Common_rs5799235 range=chr12:76032627-76032644 5'pad=9 3'pad=9 strand=+ repeatMasking=none	-0.065914
hg19_snp151Common_rs4831946 range=chr12:76168377-76168395 5'pad=9 3'pad=9 strand=- repeatMasking=none	1.93225
hg19_snp151Common_rs73141586 range=chr12:76222277-76222295 5'pad=9 3'pad=9 strand=+ repeatMasking=none	0.380893
hg19_snp151Common_rs12819031 range=chr12:76237727-76237745 5'pad=9 3'pad=9 strand=+ repeatMasking=none	0.292856
hg19_snp151Common_rs1517739 range=chr12:76546471-76546489 5'pad=9 3'pad=9 strand=+ repeatMasking=none	0.030895
hg19_snp151Common_rs2669010 range=chr12:77009051-77009069 5'pad=9 3'pad=9 strand=+ repeatMasking=none	-1.84417
hg19_snp151Common_rs147163032 range=chr12:77039135-77039153 5'pad=9 3'pad=9 strand=+ repeatMasking=none	0.695505
hg19_snp151Common_rs145276137 range=chr12:77213669-77213687 5'pad=9 3'pad=9 strand=+ repeatMasking=none	-1.5938
hg19_snp151Common_rs76982341 range=chr12:77332840-77332858 5'pad=9 3'pad=9 strand=+ repeatMasking=none	0.875465
hg19_snp151Common_rs310855 range=chr12:77461190-77461208 5'pad=9 3'pad=9 strand=+ repeatMasking=none	1.06932
hg19_snp151Common_rs1081584 range=chr12:77560075-77560093 5'pad=9 3'pad=9 strand=- repeatMasking=none	-1.69848
hg19_snp151Common_rs17043244 range=chr12:77668598-77668616 5'pad=9 3'pad=9 strand=+ repeatMasking=none	-0.091616
hg19_snp151Common_rs74107742 range=chr12:77880581-77880599 5'pad=9 3'pad=9 strand=+ repeatMasking=none	0.637649
hg19_snp151Common_rs7968009 range=chr12:78178643-78178661 5'pad=9 3'pad=9 strand=+ repeatMasking=none	0.882441
hg19_snp151Common_rs79216281 range=chr12:78250751-78250769 5'pad=9 3'pad=9 strand=+ repeatMasking=none	0.300452
hg19_snp151Common_rs2086229 range=chr12:78382994-78383012 5'pad=9 3'pad=9 strand=- repeatMasking=none	2.01945
hg19_snp151Common_rs11305296 range=chr12:78998807-78998825 5'pad=9 3'pad=9 strand=+ repeatMasking=none	4.07544
hg19_snp151Common_rs201128523 range=chr12:79046555-79046573 5'pad=9 3'pad=9 strand=+ repeatMasking=none	0.995346
hg19_snp151Common_rs146112032 range=chr12:79283888-79283905 5'pad=9 3'pad=9 strand=+ repeatMasking=none	0.807779
hg19_snp151Common_rs1526971 range=chr12:79588501-79588519 5'pad=9 3'pad=9 strand=+ repeatMasking=none	2.71625
hg19_snp151Common_rs1245778 range=chr12:79768162-79768180 5'pad=9 3'pad=9 strand=+ repeatMasking=none	-1.55175
hg19_snp151Common_rs11114027 range=chr12:79775239-79775257 5'pad=9 3'pad=9 strand=+ repeatMasking=none	0.142336
hg19_snp151Common_rs12423164 range=chr12:79808550-79808568 5'pad=9 3'pad=9 strand=+ repeatMasking=none	-0.722906
hg19_snp151Common_rs59505224 range=chr12:79880793-79880811 5'pad=9 3'pad=9 strand=+ repeatMasking=none	-0.058385
hg19_snp151Common_rs11559908 range=chr12:79891275-79891293 5'pad=9 3'pad=9 strand=+ repeatMasking=none	-1.31049
hg19_snp151Common_rs35940476 range=chr12:80277607-80277625 5'pad=9 3'pad=9 strand=+ repeatMasking=none	0.972426
hg19_snp151Common_rs76316325 range=chr12:80361259-80361277 5'pad=9 3'pad=9 strand=+ repeatMasking=none	1.50105
hg19_snp151Common_rs17006301 range=chr12:80413758-80413776 5'pad=9 3'pad=9 strand=+ repeatMasking=none	0.640131
hg19_snp151Common_rs141936907 range=chr12:80445261-80445278 5'pad=9 3'pad=9 strand=+ repeatMasking=none	-0.218763
hg19_snp151Common_rs17248984 range=chr12:80716476-80716494 5'pad=9 3'pad=9 strand=+ repeatMasking=none	-0.729246
hg19_snp151Common_rs11114440 range=chr12:80827586-80827604 5'pad=9 3'pad=9 strand=+ repeatMasking=none	1.46788
hg19_snp151Common_rs60216135 range=chr12:80838166-80838184 5'pad=9 3'pad=9 strand=+ repeatMasking=none	-1.27642
hg19_snp151Common_rs4525304 range=chr12:80925838-80925856 5'pad=9 3'pad=9 strand=+ repeatMasking=none	-1.14581
hg19_snp151Common_rs74465650 range=chr12:81014730-81014748 5'pad=9 3'pad=9 strand=+ repeatMasking=none	-2.24312
hg19_snp151Common_rs113265513 range=chr12:81509692-81509710 5'pad=9 3'pad=9 strand=+ repeatMasking=none	0.516116
hg19_snp151Common_rs55657789 range=chr12:81636379-81636397 5'pad=9 3'pad=9 strand=+ repeatMasking=none	0.824587
hg19_snp151Common_rs1921033 range=chr12:81658557-81658575 5'pad=9 3'pad=9 strand=+ repeatMasking=none	0.282072
hg19_snp151Common_rs79258679 range=chr12:81881472-81881490 5'pad=9 3'pad=9 strand=+ repeatMasking=none	-1.61878
hg19_snp151Common_rs11114916 range=chr12:81963243-81963261 5'pad=9 3'pad=9 strand=+ repeatMasking=none	-0.618603
hg19_snp151Common_rs115987894 range=chr12:82001593-82001611 5'pad=9 3'pad=9 strand=+ repeatMasking=none	-0.256955
hg19_snp151Common_rs17691218 range=chr12:82133380-82133398 5'pad=9 3'pad=9 strand=+ repeatMasking=none	1.9528
hg19_snp151Common_rs1922552 range=chr12:82158084-82158102 5'pad=9 3'pad=9 strand=- repeatMasking=none	-0.988218
hg19_snp151Common_rs6539601 range=chr12:82302793-82302811 5'pad=9 3'pad=9 strand=+ repeatMasking=none	1.93295
hg19_snp151Common_rs34736862 range=chr12:82339407-82339425 5'pad=9 3'pad=9 strand=+ repeatMasking=none	-0.947971
hg19_snp151Common_rs61934122 range=chr12:82612288-82612306 5'pad=9 3'pad=9 strand=+ repeatMasking=none	-1.41702
hg19_snp151Common_rs10161052 range=chr12:82645029-82645047 5'pad=9 3'pad=9 strand=+ repeatMasking=none	-0.867041
hg19_snp151Common_rs1655594 range=chr12:83399866-83399884 5'pad=9 3'pad=9 strand=+ repeatMasking=none	-0.858756
hg19_snp151Common_rs115640001 range=chr12:83406279-83406297 5'pad=9 3'pad=9 strand=+ repeatMasking=none	-3.62195
hg19_snp151Common_rs143876065 range=chr12:83471317-83471335 5'pad=9 3'pad=9 strand=+ repeatMasking=none	-0.742382
hg19_snp151Common_rs73145535 range=chr12:83720176-83720194 5'pad=9 3'pad=9 strand=+ repeatMasking=none	1.83199
hg19_snp151Common_rs11115740 range=chr12:83728023-83728041 5'pad=9 3'pad=9 strand=+ repeatMasking=none	-0.74189
hg19_snp151Common_rs11115748 range=chr12:83751399-83751417 5'pad=9 3'pad=9 strand=+ repeatMasking=none	1.30407
hg19_snp151Common_rs4882450 range=chr12:83785456-83785474 5'pad=9 3'pad=9 strand=+ repeatMasking=none	1.16974
hg19_snp151Common_rs36064217 range=chr12:83803237-83803255 5'pad=9 3'pad=9 strand=+ repeatMasking=none	2.33953
hg19_snp151Common_rs1387938 range=chr12:83842321-83842339 5'pad=9 3'pad=9 strand=- repeatMasking=none	-0.416904
hg19_snp151Common_rs74978780 range=chr12:83879607-83879625 5'pad=9 3'pad=9 strand=+ repeatMasking=none	0.44359
hg19_snp151Common_rs74107967 range=chr12:83962065-83962083 5'pad=9 3'pad=9 strand=+ repeatMasking=none	0.285851
hg19_snp151Common_rs11116035 range=chr12:84169889-84169907 5'pad=9 3'pad=9 strand=+ repeatMasking=none	-0.40348
hg19_snp151Common_rs532260402 range=chr12:84283475-84283493 5'pad=9 3'pad=9 strand=+ repeatMasking=none	-3.01329
hg19_snp151Common_rs7976234 range=chr12:84493507-84493525 5'pad=9 3'pad=9 strand=+ repeatMasking=none	-0.581568
hg19_snp151Common_rs2086619 range=chr12:84494601-84494619 5'pad=9 3'pad=9 strand=- repeatMasking=none	-3.16763
hg19_snp151Common_rs11831985 range=chr12:84762999-84763017 5'pad=9 3'pad=9 strand=+ repeatMasking=none	-1.04632
hg19_snp151Common_rs7968939 range=chr12:84810022-84810040 5'pad=9 3'pad=9 strand=+ repeatMasking=none	-3.35858
hg19_snp151Common_rs11116520 range=chr12:85051300-85051318 5'pad=9 3'pad=9 strand=+ repeatMasking=none	-1.03593
hg19_snp151Common_rs77362991 range=chr12:85053643-85053661 5'pad=9 3'pad=9 strand=+ repeatMasking=none	0.180987
hg19_snp151Common_rs1545495 range=chr12:85142894-85142912 5'pad=9 3'pad=9 strand=- repeatMasking=none	-0.894478
hg19_snp151Common_rs7301429 range=chr12:85235986-85236004 5'pad=9 3'pad=9 strand=+ repeatMasking=none	-3.00479
hg19_snp151Common_rs1947087 range=chr12:85309139-85309157 5'pad=9 3'pad=9 strand=- repeatMasking=none	-1.98609
hg19_snp151Common_rs61499960 range=chr12:85485426-85485444 5'pad=9 3'pad=9 strand=+ repeatMasking=none	1.23766
hg19_snp151Common_rs2708498 range=chr12:85571063-85571081 5'pad=9 3'pad=9 strand=+ repeatMasking=none	0.007565
hg19_snp151Common_rs12306104 range=chr12:85948772-85948790 5'pad=9 3'pad=9 strand=+ repeatMasking=none	-1.60491
hg19_snp151Common_rs150779784 range=chr12:86585722-86585740 5'pad=9 3'pad=9 strand=+ repeatMasking=none	1.73562
hg19_snp151Common_rs139599258 range=chr12:86777277-86777295 5'pad=9 3'pad=9 strand=+ repeatMasking=none	-0.266636
hg19_snp151Common_rs10776981 range=chr12:86887374-86887392 5'pad=9 3'pad=9 strand=+ repeatMasking=none	-2.44688
hg19_snp151Common_rs4365118 range=chr12:87171219-87171237 5'pad=9 3'pad=9 strand=+ repeatMasking=none	-0.722359
hg19_snp151Common_rs35227751 range=chr12:87524628-87524646 5'pad=9 3'pad=9 strand=+ repeatMasking=none	-1.12673
hg19_snp151Common_rs11104306 range=chr12:87529166-87529184 5'pad=9 3'pad=9 strand=+ repeatMasking=none	-1.05662
hg19_snp151Common_rs145012416 range=chr12:87554346-87554364 5'pad=9 3'pad=9 strand=+ repeatMasking=none	-0.016955
hg19_snp151Common_rs68166481 range=chr12:87622714-87622732 5'pad=9 3'pad=9 strand=+ repeatMasking=none	1.27082
hg19_snp151Common_rs10506939 range=chr12:87654049-87654067 5'pad=9 3'pad=9 strand=+ repeatMasking=none	-0.382038
hg19_snp151Common_rs11104379 range=chr12:87659980-87659998 5'pad=9 3'pad=9 strand=+ repeatMasking=none	-2.7584
hg19_snp151Common_rs79939815 range=chr12:87682250-87682268 5'pad=9 3'pad=9 strand=+ repeatMasking=none	-1.38598
hg19_snp151Common_rs7139345 range=chr12:87702342-87702360 5'pad=9 3'pad=9 strand=+ repeatMasking=none	0.722207
hg19_snp151Common_rs704058 range=chr12:88033645-88033663 5'pad=9 3'pad=9 strand=- repeatMasking=none	-3.39886
hg19_snp151Common_rs78850457 range=chr12:88126512-88126530 5'pad=9 3'pad=9 strand=+ repeatMasking=none	-2.42694
hg19_snp151Common_rs1114194 range=chr12:88173311-88173329 5'pad=9 3'pad=9 strand=+ repeatMasking=none	-1.15918
hg19_snp151Common_rs7486761 range=chr12:88351556-88351574 5'pad=9 3'pad=9 strand=+ repeatMasking=none	-1.89429
hg19_snp151Common_rs75807406 range=chr12:88506293-88506311 5'pad=9 3'pad=9 strand=+ repeatMasking=none	0.175954
hg19_snp151Common_rs7485589 range=chr12:88596564-88596582 5'pad=9 3'pad=9 strand=+ repeatMasking=none	-1.08343
hg19_snp151Common_rs11495048 range=chr12:88833905-88833923 5'pad=9 3'pad=9 strand=+ repeatMasking=none	1.73943
hg19_snp151Common_rs78101721 range=chr12:89962824-89962842 5'pad=9 3'pad=9 strand=+ repeatMasking=none	-0.778232
hg19_snp151Common_rs1432116 range=chr12:90889695-90889713 5'pad=9 3'pad=9 strand=+ repeatMasking=none	-2.05344
hg19_snp151Common_rs1432112 range=chr12:90893689-90893707 5'pad=9 3'pad=9 strand=- repeatMasking=none	0.134556
hg19_snp151Common_rs12303056 range=chr12:91059018-91059036 5'pad=9 3'pad=9 strand=+ repeatMasking=none	0.89191
hg19_snp151Common_rs61924898 range=chr12:91080963-91080981 5'pad=9 3'pad=9 strand=+ repeatMasking=none	-1.24337
hg19_snp151Common_rs10735281 range=chr12:91167160-91167178 5'pad=9 3'pad=9 strand=+ repeatMasking=none	-1.03283
hg19_snp151Common_rs117904239 range=chr12:91608058-91608076 5'pad=9 3'pad=9 strand=+ repeatMasking=none	0.93957
hg19_snp151Common_rs1522406 range=chr12:91611214-91611232 5'pad=9 3'pad=9 strand=- repeatMasking=none	2.50821
hg19_snp151Common_rs11299330 range=chr12:91639470-91639488 5'pad=9 3'pad=9 strand=+ repeatMasking=none	0.609955
hg19_snp151Common_rs76262742 range=chr12:91867449-91867467 5'pad=9 3'pad=9 strand=+ repeatMasking=none	1.39603
hg19_snp151Common_rs10859164 range=chr12:91932787-91932805 5'pad=9 3'pad=9 strand=+ repeatMasking=none	-0.996432
hg19_snp151Common_rs76122669 range=chr12:92119024-92119042 5'pad=9 3'pad=9 strand=+ repeatMasking=none	-2.8437
hg19_snp151Common_rs10859192 range=chr12:92134530-92134548 5'pad=9 3'pad=9 strand=+ repeatMasking=none	-1.44087
hg19_snp151Common_rs115717963 range=chr12:92417609-92417627 5'pad=9 3'pad=9 strand=+ repeatMasking=none	2.03539
hg19_snp151Common_rs141524362 range=chr12:92455427-92455445 5'pad=9 3'pad=9 strand=+ repeatMasking=none	0.985319
hg19_snp151Common_rs10777388 range=chr12:92658278-92658296 5'pad=9 3'pad=9 strand=+ repeatMasking=none	-0.58467
hg19_snp151Common_rs10859295 range=chr12:92687107-92687125 5'pad=9 3'pad=9 strand=+ repeatMasking=none	-0.483564
hg19_snp151Common_rs60792409 range=chr12:92869247-92869265 5'pad=9 3'pad=9 strand=+ repeatMasking=none	0.137265
hg19_snp151Common_rs4237849 range=chr12:92988040-92988058 5'pad=9 3'pad=9 strand=+ repeatMasking=none	1.54238
hg19_snp151Common_rs76069667 range=chr12:92999589-92999607 5'pad=9 3'pad=9 strand=+ repeatMasking=none	-0.775821
hg19_snp151Common_rs10507017 range=chr12:93164927-93164945 5'pad=9 3'pad=9 strand=+ repeatMasking=none	1.99156
hg19_snp151Common_rs4589345 range=chr12:93340839-93340857 5'pad=9 3'pad=9 strand=+ repeatMasking=none	2.12912
hg19_snp151Common_rs12830135 range=chr12:93545827-93545845 5'pad=9 3'pad=9 strand=+ repeatMasking=none	-1.55201
hg19_snp151Common_rs10735318 range=chr12:93859546-93859564 5'pad=9 3'pad=9 strand=+ repeatMasking=none	-0.122416
hg19_snp151Common_rs79079412 range=chr12:93987186-93987204 5'pad=9 3'pad=9 strand=+ repeatMasking=none	0.315085
hg19_snp151Common_rs11829153 range=chr12:94004465-94004483 5'pad=9 3'pad=9 strand=+ repeatMasking=none	1.99469
hg19_snp151Common_rs141848683 range=chr12:94051298-94051316 5'pad=9 3'pad=9 strand=+ repeatMasking=none	-1.4154
hg19_snp151Common_rs10161389 range=chr12:94141250-94141268 5'pad=9 3'pad=9 strand=+ repeatMasking=none	-1.03607
hg19_snp151Common_rs73375435 range=chr12:94450373-94450391 5'pad=9 3'pad=9 strand=+ repeatMasking=none	1.04658
hg19_snp151Common_rs10859659 range=chr12:94488876-94488894 5'pad=9 3'pad=9 strand=+ repeatMasking=none	-0.37322
hg19_snp151Common_rs7297304 range=chr12:94517259-94517277 5'pad=9 3'pad=9 strand=+ repeatMasking=none	3.20394
hg19_snp151Common_rs7955692 range=chr12:95096237-95096255 5'pad=9 3'pad=9 strand=+ repeatMasking=none	0.797212
hg19_snp151Common_rs140520372 range=chr12:95183977-95183995 5'pad=9 3'pad=9 strand=+ repeatMasking=none	-2.05211
hg19_snp151Common_rs59457231 range=chr12:95200376-95200394 5'pad=9 3'pad=9 strand=+ repeatMasking=none	0.15338
hg19_snp151Common_rs34491390 range=chr12:95261645-95261662 5'pad=9 3'pad=9 strand=+ repeatMasking=none	-1.72948
hg19_snp151Common_rs79912865 range=chr12:95287957-95287975 5'pad=9 3'pad=9 strand=+ repeatMasking=none	0.088345
hg19_snp151Common_rs79597912 range=chr12:95288727-95288745 5'pad=9 3'pad=9 strand=+ repeatMasking=none	-0.314658
hg19_snp151Common_rs144814850 range=chr12:95305902-95305920 5'pad=9 3'pad=9 strand=+ repeatMasking=none	2.01966
hg19_snp151Common_rs80128461 range=chr12:95331861-95331879 5'pad=9 3'pad=9 strand=+ repeatMasking=none	-0.766411
hg19_snp151Common_rs76529245 range=chr12:95814923-95814941 5'pad=9 3'pad=9 strand=+ repeatMasking=none	0.867895
hg19_snp151Common_rs2367870 range=chr12:96435550-96435568 5'pad=9 3'pad=9 strand=+ repeatMasking=none	-0.468126
hg19_snp151Common_rs17025191 range=chr12:96516504-96516522 5'pad=9 3'pad=9 strand=+ repeatMasking=none	1.48424
hg19_snp151Common_rs56339115 range=chr12:96553304-96553322 5'pad=9 3'pad=9 strand=+ repeatMasking=none	1.63899
hg19_snp151Common_rs112402795 range=chr12:96588459-96588477 5'pad=9 3'pad=9 strand=+ repeatMasking=none	-0.10669
hg19_snp151Common_rs41403749 range=chr12:96754093-96754111 5'pad=9 3'pad=9 strand=+ repeatMasking=none	2.01474
hg19_snp151Common_rs2368053 range=chr12:96826241-96826259 5'pad=9 3'pad=9 strand=+ repeatMasking=none	-0.032904
hg19_snp151Common_rs74764853 range=chr12:96846991-96847009 5'pad=9 3'pad=9 strand=+ repeatMasking=none	0.031902
hg19_snp151Common_rs12230718 range=chr12:96936415-96936433 5'pad=9 3'pad=9 strand=+ repeatMasking=none	-0.064713
hg19_snp151Common_rs17327035 range=chr12:97139839-97139857 5'pad=9 3'pad=9 strand=+ repeatMasking=none	-0.458047
hg19_snp151Common_rs17025902 range=chr12:97177317-97177335 5'pad=9 3'pad=9 strand=+ repeatMasking=none	0.212285
hg19_snp151Common_rs56310943 range=chr12:97217726-97217744 5'pad=9 3'pad=9 strand=+ repeatMasking=none	-0.650669
hg19_snp151Common_rs75794137 range=chr12:97309042-97309060 5'pad=9 3'pad=9 strand=+ repeatMasking=none	1.80892
hg19_snp151Common_rs76058400 range=chr12:97369933-97369951 5'pad=9 3'pad=9 strand=+ repeatMasking=none	-0.20872
hg19_snp151Common_rs146140139 range=chr12:97455298-97455315 5'pad=9 3'pad=9 strand=+ repeatMasking=none	0.825613
hg19_snp151Common_rs146473553 range=chr12:97517678-97517696 5'pad=9 3'pad=9 strand=+ repeatMasking=none	1.54324
hg19_snp151Common_rs78039058 range=chr12:97612497-97612515 5'pad=9 3'pad=9 strand=+ repeatMasking=none	-0.006619
hg19_snp151Common_rs74827887 range=chr12:97728352-97728370 5'pad=9 3'pad=9 strand=+ repeatMasking=none	-2.1407
hg19_snp151Common_rs12303469 range=chr12:97867932-97867950 5'pad=9 3'pad=9 strand=+ repeatMasking=none	1.29642
hg19_snp151Common_rs5800311 range=chr12:97892370-97892388 5'pad=9 3'pad=9 strand=+ repeatMasking=none	-0.578449
hg19_snp151Common_rs12312506 range=chr12:97933855-97933873 5'pad=9 3'pad=9 strand=+ repeatMasking=none	-2.3543
hg19_snp151Common_rs117689953 range=chr12:97939591-97939609 5'pad=9 3'pad=9 strand=+ repeatMasking=none	-0.09829
hg19_snp151Common_rs59458591 range=chr12:98048978-98048996 5'pad=9 3'pad=9 strand=+ repeatMasking=none	0.628816
hg19_snp151Common_rs35742853 range=chr12:98160676-98160694 5'pad=9 3'pad=9 strand=+ repeatMasking=none	-0.737381
hg19_snp151Common_rs17027590 range=chr12:98258864-98258882 5'pad=9 3'pad=9 strand=+ repeatMasking=none	-0.617436
hg19_snp151Common_rs77714859 range=chr12:98318885-98318903 5'pad=9 3'pad=9 strand=+ repeatMasking=none	-0.424192
hg19_snp151Common_rs150949519 range=chr12:98348082-98348100 5'pad=9 3'pad=9 strand=+ repeatMasking=none	0.871071
hg19_snp151Common_rs111853561 range=chr12:98483375-98483393 5'pad=9 3'pad=9 strand=+ repeatMasking=none	-2.47089
hg19_snp151Common_rs71462216 range=chr12:98495703-98495721 5'pad=9 3'pad=9 strand=+ repeatMasking=none	-0.322753
hg19_snp151Common_rs7309389 range=chr12:98584619-98584637 5'pad=9 3'pad=9 strand=+ repeatMasking=none	0.060837
hg19_snp151Common_rs17028062 range=chr12:98673937-98673955 5'pad=9 3'pad=9 strand=+ repeatMasking=none	-2.5854
hg19_snp151Common_rs11109497 range=chr12:98882094-98882112 5'pad=9 3'pad=9 strand=+ repeatMasking=none	0.930734
hg19_snp151Common_rs7138837 range=chr12:99015612-99015630 5'pad=9 3'pad=9 strand=+ repeatMasking=none	-2.48255
hg19_snp151Common_rs75377389 range=chr12:99044747-99044765 5'pad=9 3'pad=9 strand=+ repeatMasking=none	-1.39402
hg19_snp151Common_rs74935880 range=chr12:99141995-99142013 5'pad=9 3'pad=9 strand=+ repeatMasking=none	-0.2487
hg19_snp151Common_rs4762511 range=chr12:99182251-99182269 5'pad=9 3'pad=9 strand=+ repeatMasking=none	-0.891787
hg19_snp151Common_rs715324 range=chr12:99219001-99219019 5'pad=9 3'pad=9 strand=+ repeatMasking=none	1.02972
hg19_snp151Common_rs7969490 range=chr12:99403782-99403800 5'pad=9 3'pad=9 strand=+ repeatMasking=none	-1.18542
hg19_snp151Common_rs7298691 range=chr12:99525378-99525396 5'pad=9 3'pad=9 strand=+ repeatMasking=none	1.8218
hg19_snp151Common_rs148258569 range=chr12:99584145-99584163 5'pad=9 3'pad=9 strand=+ repeatMasking=none	0.14979
hg19_snp151Common_rs79160258 range=chr12:99781562-99781580 5'pad=9 3'pad=9 strand=+ repeatMasking=none	-0.987819
hg19_snp151Common_rs2466565 range=chr12:99816385-99816403 5'pad=9 3'pad=9 strand=+ repeatMasking=none	-2.22357
hg19_snp151Common_rs7976908 range=chr12:99947586-99947604 5'pad=9 3'pad=9 strand=+ repeatMasking=none	-0.839326
hg19_snp151Common_rs150299157 range=chr12:100082514-100082532 5'pad=9 3'pad=9 strand=+ repeatMasking=none	-1.23022
hg19_snp151Common_rs56102136 range=chr12:100258725-100258743 5'pad=9 3'pad=9 strand=+ repeatMasking=none	-0.445567
hg19_snp151Common_rs7135959 range=chr12:100331378-100331396 5'pad=9 3'pad=9 strand=+ repeatMasking=none	-1.69128
hg19_snp151Common_rs61941776 range=chr12:100767925-100767943 5'pad=9 3'pad=9 strand=+ repeatMasking=none	1.18051
hg19_snp151Common_rs10778056 range=chr12:101023570-101023588 5'pad=9 3'pad=9 strand=+ repeatMasking=none	-0.374242
hg19_snp151Common_rs193018867 range=chr12:101030576-101030594 5'pad=9 3'pad=9 strand=+ repeatMasking=none	0.056811
hg19_snp151Common_rs10778057 range=chr12:101041444-101041462 5'pad=9 3'pad=9 strand=+ repeatMasking=none	-1.21358
hg19_snp151Common_rs77761308 range=chr12:101152380-101152398 5'pad=9 3'pad=9 strand=+ repeatMasking=none	-1.12737
hg19_snp151Common_rs141419974 range=chr12:101179611-101179629 5'pad=9 3'pad=9 strand=+ repeatMasking=none	-0.884926
hg19_snp151Common_rs114616874 range=chr12:101201927-101201945 5'pad=9 3'pad=9 strand=+ repeatMasking=none	-3.23123
hg19_snp151Common_rs1514784 range=chr12:101234054-101234072 5'pad=9 3'pad=9 strand=+ repeatMasking=none	-1.44351
hg19_snp151Common_rs938436 range=chr12:101344810-101344828 5'pad=9 3'pad=9 strand=+ repeatMasking=none	0.375586
hg19_snp151Common_rs12424473 range=chr12:101940355-101940373 5'pad=9 3'pad=9 strand=+ repeatMasking=none	-0.446822
hg19_snp151Common_rs115904455 range=chr12:102032052-102032070 5'pad=9 3'pad=9 strand=+ repeatMasking=none	-1.78764
hg19_snp151Common_rs73392431 range=chr12:102128242-102128260 5'pad=9 3'pad=9 strand=+ repeatMasking=none	-0.111764
hg19_snp151Common_rs146946788 range=chr12:102222217-102222235 5'pad=9 3'pad=9 strand=+ repeatMasking=none	-1.761
hg19_snp151Common_rs115989980 range=chr12:102231456-102231474 5'pad=9 3'pad=9 strand=+ repeatMasking=none	1.43814
hg19_snp151Common_rs74696685 range=chr12:102301523-102301541 5'pad=9 3'pad=9 strand=+ repeatMasking=none	-0.658359
hg19_snp151Common_rs4280054 range=chr12:102325808-102325826 5'pad=9 3'pad=9 strand=+ repeatMasking=none	3.03226
hg19_snp151Common_rs855213 range=chr12:102908288-102908306 5'pad=9 3'pad=9 strand=- repeatMasking=none	1.44027
hg19_snp151Common_rs35760 range=chr12:102950209-102950227 5'pad=9 3'pad=9 strand=- repeatMasking=none	-0.385074
hg19_snp151Common_rs149290770 range=chr12:103517245-103517263 5'pad=9 3'pad=9 strand=+ repeatMasking=none	-1.34325
hg19_snp151Common_rs80134809 range=chr12:103686945-103686963 5'pad=9 3'pad=9 strand=+ repeatMasking=none	-0.737718
hg19_snp151Common_rs116159657 range=chr12:103909475-103909493 5'pad=9 3'pad=9 strand=+ repeatMasking=none	-1.01458
hg19_snp151Common_rs17500749 range=chr12:103978755-103978773 5'pad=9 3'pad=9 strand=+ repeatMasking=none	1.03058
hg19_snp151Common_rs2576977 range=chr12:104236616-104236634 5'pad=9 3'pad=9 strand=- repeatMasking=none	-1.89578
hg19_snp151Common_rs12822539 range=chr12:104249224-104249242 5'pad=9 3'pad=9 strand=+ repeatMasking=none	1.22298
hg19_snp151Common_rs7309185 range=chr12:104512823-104512841 5'pad=9 3'pad=9 strand=+ repeatMasking=none	-2.54348
hg19_snp151Common_rs150078115 range=chr12:104760571-104760589 5'pad=9 3'pad=9 strand=+ repeatMasking=none	-1.12401
hg19_snp151Common_rs60467477 range=chr12:105190367-105190385 5'pad=9 3'pad=9 strand=+ repeatMasking=none	-1.13511
hg19_snp151Common_rs4393404 range=chr12:105283926-105283944 5'pad=9 3'pad=9 strand=+ repeatMasking=none	-1.50663
hg19_snp151Common_rs77958386 range=chr12:105432900-105432918 5'pad=9 3'pad=9 strand=+ repeatMasking=none	0.361328
hg19_snp151Common_rs11112383 range=chr12:105531854-105531872 5'pad=9 3'pad=9 strand=+ repeatMasking=none	-1.10236
hg19_snp151Common_rs11513893 range=chr12:105910012-105910030 5'pad=9 3'pad=9 strand=+ repeatMasking=none	0.545054
hg19_snp151Common_rs17037416 range=chr12:106070009-106070027 5'pad=9 3'pad=9 strand=+ repeatMasking=none	0.406378
hg19_snp151Common_rs147474984 range=chr12:106141880-106141898 5'pad=9 3'pad=9 strand=+ repeatMasking=none	1.23175
hg19_snp151Common_rs201718105 range=chr12:106180976-106180994 5'pad=9 3'pad=9 strand=+ repeatMasking=none	0.034187
hg19_snp151Common_rs78728172 range=chr12:106223303-106223321 5'pad=9 3'pad=9 strand=+ repeatMasking=none	1.57946
hg19_snp151Common_rs144610182 range=chr12:106270590-106270608 5'pad=9 3'pad=9 strand=+ repeatMasking=none	0.232824
hg19_snp151Common_rs11112852 range=chr12:106458451-106458469 5'pad=9 3'pad=9 strand=+ repeatMasking=none	0.290614
hg19_snp151Common_rs73195607 range=chr12:106546459-106546477 5'pad=9 3'pad=9 strand=+ repeatMasking=none	-1.89465
hg19_snp151Common_rs4399406 range=chr12:107337274-107337292 5'pad=9 3'pad=9 strand=+ repeatMasking=none	-0.919924
hg19_snp151Common_rs11513903 range=chr12:107439651-107439669 5'pad=9 3'pad=9 strand=+ repeatMasking=none	-1.76402
hg19_snp151Common_rs11837249 range=chr12:107475296-107475314 5'pad=9 3'pad=9 strand=+ repeatMasking=none	0.221746
hg19_snp151Common_rs10047522 range=chr12:107801844-107801862 5'pad=9 3'pad=9 strand=+ repeatMasking=none	0.211294
hg19_snp151Common_rs11495204 range=chr12:107927875-107927893 5'pad=9 3'pad=9 strand=+ repeatMasking=none	0.139238
hg19_snp151Common_rs67446565 range=chr12:108098056-108098074 5'pad=9 3'pad=9 strand=+ repeatMasking=none	0.723329
hg19_snp151Common_rs74819270 range=chr12:108406723-108406741 5'pad=9 3'pad=9 strand=+ repeatMasking=none	0.577692
hg19_snp151Common_rs17041608 range=chr12:108407963-108407981 5'pad=9 3'pad=9 strand=+ repeatMasking=none	-0.830179
hg19_snp151Common_rs144394600 range=chr12:108714101-108714119 5'pad=9 3'pad=9 strand=+ repeatMasking=none	-0.264641
hg19_snp151Common_rs73402717 range=chr12:108890338-108890356 5'pad=9 3'pad=9 strand=+ repeatMasking=none	0.648664
hg19_snp151Common_rs147680147 range=chr12:109373235-109373253 5'pad=9 3'pad=9 strand=+ repeatMasking=none	-0.415027
hg19_snp151Common_rs36171909 range=chr12:109424215-109424233 5'pad=9 3'pad=9 strand=+ repeatMasking=none	0.585697
hg19_snp151Common_rs143814872 range=chr12:109837513-109837531 5'pad=9 3'pad=9 strand=+ repeatMasking=none	-0.703727
hg19_snp151Common_rs76955555 range=chr12:109983107-109983125 5'pad=9 3'pad=9 strand=+ repeatMasking=none	-3.1279
hg19_snp151Common_rs11614986 range=chr12:110007930-110007948 5'pad=9 3'pad=9 strand=+ repeatMasking=none	-1.36063
hg19_snp151Common_rs11067376 range=chr12:110027786-110027804 5'pad=9 3'pad=9 strand=+ repeatMasking=none	2.14656
hg19_snp151Common_rs199774647 range=chr12:111245249-111245266 5'pad=9 3'pad=9 strand=+ repeatMasking=none	0.379176
hg19_snp151Common_rs146628400 range=chr12:111273188-111273206 5'pad=9 3'pad=9 strand=+ repeatMasking=none	2.3176
hg19_snp151Common_rs2339600 range=chr12:111365855-111365873 5'pad=9 3'pad=9 strand=+ repeatMasking=none	-1.58363
hg19_snp151Common_rs115996883 range=chr12:111693162-111693180 5'pad=9 3'pad=9 strand=+ repeatMasking=none	-0.487811
hg19_snp151Common_rs56390488 range=chr12:111984045-111984063 5'pad=9 3'pad=9 strand=+ repeatMasking=none	1.16287
hg19_snp151Common_rs76751969 range=chr12:112416838-112416856 5'pad=9 3'pad=9 strand=+ repeatMasking=none	1.02152
hg19_snp151Common_rs233717 range=chr12:113039431-113039449 5'pad=9 3'pad=9 strand=- repeatMasking=none	1.68674
hg19_snp151Common_rs232927 range=chr12:113112271-113112289 5'pad=9 3'pad=9 strand=+ repeatMasking=none	-0.417651
hg19_snp151Common_rs78777545 range=chr12:113117781-113117799 5'pad=9 3'pad=9 strand=+ repeatMasking=none	0.358627
hg19_snp151Common_rs560010256 range=chr12:113150897-113150915 5'pad=9 3'pad=9 strand=+ repeatMasking=none	0.763451
hg19_snp151Common_rs2891405 range=chr12:113152088-113152106 5'pad=9 3'pad=9 strand=+ repeatMasking=none	1.13248
hg19_snp151Common_rs11612626 range=chr12:113289015-113289033 5'pad=9 3'pad=9 strand=+ repeatMasking=none	-2.4414
hg19_snp151Common_rs2057778 range=chr12:113350787-113350805 5'pad=9 3'pad=9 strand=- repeatMasking=none	-0.308695
hg19_snp151Common_rs1732773 range=chr12:113465602-113465620 5'pad=9 3'pad=9 strand=+ repeatMasking=none	-0.478563
hg19_snp151Common_rs2701623 range=chr12:113522765-113522783 5'pad=9 3'pad=9 strand=- repeatMasking=none	0.253697
hg19_snp151Common_rs1674117 range=chr12:113523806-113523824 5'pad=9 3'pad=9 strand=+ repeatMasking=none	2.65682
hg19_snp151Common_rs76010357 range=chr12:113690499-113690517 5'pad=9 3'pad=9 strand=+ repeatMasking=none	-1.45765
hg19_snp151Common_rs73192834 range=chr12:113721413-113721431 5'pad=9 3'pad=9 strand=+ repeatMasking=none	2.05009
hg19_snp151Common_rs113498388 range=chr12:113767116-113767134 5'pad=9 3'pad=9 strand=+ repeatMasking=none	3.32824
hg19_snp151Common_rs12817952 range=chr12:113868702-113868720 5'pad=9 3'pad=9 strand=+ repeatMasking=none	0.482368
hg19_snp151Common_rs114373551 range=chr12:113901648-113901666 5'pad=9 3'pad=9 strand=+ repeatMasking=none	0.313163
hg19_snp151Common_rs141860467 range=chr12:113944527-113944545 5'pad=9 3'pad=9 strand=+ repeatMasking=none	-0.550287
hg19_snp151Common_rs57288584 range=chr12:114063320-114063338 5'pad=9 3'pad=9 strand=+ repeatMasking=none	-0.776206
hg19_snp151Common_rs11066695 range=chr12:114146691-114146709 5'pad=9 3'pad=9 strand=+ repeatMasking=none	-0.104725
hg19_snp151Common_rs147958405 range=chr12:114323714-114323732 5'pad=9 3'pad=9 strand=+ repeatMasking=none	-0.257143
hg19_snp151Common_rs12310777 range=chr12:114347712-114347730 5'pad=9 3'pad=9 strand=+ repeatMasking=none	-3.66649
hg19_snp151Common_rs78272844 range=chr12:114630924-114630942 5'pad=9 3'pad=9 strand=+ repeatMasking=none	-0.00653
hg19_snp151Common_rs5801031 range=chr12:114654189-114654207 5'pad=9 3'pad=9 strand=+ repeatMasking=none	2.15192
hg19_snp151Common_rs143511878 range=chr12:114792516-114792534 5'pad=9 3'pad=9 strand=+ repeatMasking=none	1.10568
hg19_snp151Common_rs11067079 range=chr12:114802994-114803012 5'pad=9 3'pad=9 strand=+ repeatMasking=none	-1.42796
hg19_snp151Common_rs201952797 range=chr12:114970483-114970501 5'pad=9 3'pad=9 strand=+ repeatMasking=none	4.24626
hg19_snp151Common_rs116270649 range=chr12:115052264-115052282 5'pad=9 3'pad=9 strand=+ repeatMasking=none	-0.22286
hg19_snp151Common_rs80060498 range=chr12:115129413-115129431 5'pad=9 3'pad=9 strand=+ repeatMasking=none	-1.56272
hg19_snp151Common_rs78651614 range=chr12:115256926-115256944 5'pad=9 3'pad=9 strand=+ repeatMasking=none	1.11257
hg19_snp151Common_rs35474 range=chr12:115529733-115529751 5'pad=9 3'pad=9 strand=- repeatMasking=none	-0.070085
hg19_snp151Common_rs147564036 range=chr12:115654678-115654696 5'pad=9 3'pad=9 strand=+ repeatMasking=none	2.21665
hg19_snp151Common_rs11837476 range=chr12:115881623-115881641 5'pad=9 3'pad=9 strand=+ repeatMasking=none	1.48182
hg19_snp151Common_rs7974919 range=chr12:116174400-116174418 5'pad=9 3'pad=9 strand=+ repeatMasking=none	-0.539766
hg19_snp151Common_rs11067942 range=chr12:116635454-116635472 5'pad=9 3'pad=9 strand=+ repeatMasking=none	0.075312
hg19_snp151Common_rs79347782 range=chr12:116777321-116777339 5'pad=9 3'pad=9 strand=+ repeatMasking=none	-0.716804
hg19_snp151Common_rs10744878 range=chr12:116964221-116964239 5'pad=9 3'pad=9 strand=+ repeatMasking=none	0.849332
hg19_snp151Common_rs4766794 range=chr12:117005700-117005718 5'pad=9 3'pad=9 strand=+ repeatMasking=none	0.174012
hg19_snp151Common_rs546905413 range=chr12:117176184-117176201 5'pad=9 3'pad=9 strand=+ repeatMasking=none	-0.206387
hg19_snp151Common_rs58963573 range=chr12:117258971-117258989 5'pad=9 3'pad=9 strand=+ repeatMasking=none	-1.68168
hg19_snp151Common_rs73403261 range=chr12:117476311-117476329 5'pad=9 3'pad=9 strand=+ repeatMasking=none	0.531907
hg19_snp151Common_rs7959940 range=chr12:117523076-117523094 5'pad=9 3'pad=9 strand=+ repeatMasking=none	-0.104554
hg19_snp151Common_rs11068397 range=chr12:117628547-117628565 5'pad=9 3'pad=9 strand=+ repeatMasking=none	0.041463
hg19_snp151Common_rs2293052 range=chr12:117715611-117715629 5'pad=9 3'pad=9 strand=- repeatMasking=none	1.20959
hg19_snp151Common_rs77125875 range=chr12:117740047-117740065 5'pad=9 3'pad=9 strand=+ repeatMasking=none	1.60701
hg19_snp151Common_rs112354279 range=chr12:117774935-117774953 5'pad=9 3'pad=9 strand=+ repeatMasking=none	0.710304
hg19_snp151Common_rs115623943 range=chr12:118292352-118292370 5'pad=9 3'pad=9 strand=+ repeatMasking=none	-0.450078
hg19_snp151Common_rs2570557 range=chr12:118302870-118302888 5'pad=9 3'pad=9 strand=- repeatMasking=none	1.34944
hg19_snp151Common_rs17619337 range=chr12:118325929-118325947 5'pad=9 3'pad=9 strand=+ repeatMasking=none	0.239808
hg19_snp151Common_rs76593166 range=chr12:118387299-118387317 5'pad=9 3'pad=9 strand=+ repeatMasking=none	0.407185
hg19_snp151Common_rs4445740 range=chr12:118412464-118412482 5'pad=9 3'pad=9 strand=+ repeatMasking=none	-1.72132
hg19_snp151Common_rs112422075 range=chr12:118563813-118563831 5'pad=9 3'pad=9 strand=+ repeatMasking=none	-0.19626
hg19_snp151Common_rs74412085 range=chr12:118604941-118604959 5'pad=9 3'pad=9 strand=+ repeatMasking=none	-1.02862
hg19_snp151Common_rs111769853 range=chr12:118643023-118643041 5'pad=9 3'pad=9 strand=+ repeatMasking=none	2.43084
hg19_snp151Common_rs78468793 range=chr12:118762158-118762176 5'pad=9 3'pad=9 strand=+ repeatMasking=none	-0.039347
hg19_snp151Common_rs56400137 range=chr12:118920240-118920258 5'pad=9 3'pad=9 strand=+ repeatMasking=none	3.75389
hg19_snp151Common_rs2682764 range=chr12:119031984-119032002 5'pad=9 3'pad=9 strand=- repeatMasking=none	-0.799195
hg19_snp151Common_rs115888134 range=chr12:119207737-119207755 5'pad=9 3'pad=9 strand=+ repeatMasking=none	0.502035
hg19_snp151Common_rs10735113 range=chr12:119250356-119250374 5'pad=9 3'pad=9 strand=+ repeatMasking=none	-0.007354
hg19_snp151Common_rs11609256 range=chr12:119389529-119389547 5'pad=9 3'pad=9 strand=+ repeatMasking=none	-0.949257
hg19_snp151Common_rs138381075 range=chr12:120045787-120045805 5'pad=9 3'pad=9 strand=+ repeatMasking=none	1.46288
hg19_snp151Common_rs113178475 range=chr12:120433766-120433784 5'pad=9 3'pad=9 strand=+ repeatMasking=none	-0.614699
hg19_snp151Common_rs1710143 range=chr12:120943437-120943455 5'pad=9 3'pad=9 strand=+ repeatMasking=none	-0.39507
hg19_snp151Common_rs1167718 range=chr12:120979385-120979403 5'pad=9 3'pad=9 strand=- repeatMasking=none	-0.584248
hg19_snp151Common_rs6490296 range=chr12:121051276-121051294 5'pad=9 3'pad=9 strand=+ repeatMasking=none	-0.032293
hg19_snp151Common_rs111942532 range=chr12:121369955-121369973 5'pad=9 3'pad=9 strand=+ repeatMasking=none	-0.914313
hg19_snp151Common_rs7960932 range=chr12:121375575-121375593 5'pad=9 3'pad=9 strand=+ repeatMasking=none	-0.183499
hg19_snp151Common_rs76703262 range=chr12:121480528-121480546 5'pad=9 3'pad=9 strand=+ repeatMasking=none	1.2236
hg19_snp151Common_rs12819229 range=chr12:121773809-121773827 5'pad=9 3'pad=9 strand=+ repeatMasking=none	0.598883
hg19_snp151Common_rs115212207 range=chr12:122105299-122105317 5'pad=9 3'pad=9 strand=+ repeatMasking=none	0.278963
hg19_snp151Common_rs7309634 range=chr12:122116982-122117000 5'pad=9 3'pad=9 strand=+ repeatMasking=none	-2.62101
hg19_snp151Common_rs74459612 range=chr12:122239967-122239985 5'pad=9 3'pad=9 strand=+ repeatMasking=none	1.86759
hg19_snp151Common_rs56177852 range=chr12:122339326-122339344 5'pad=9 3'pad=9 strand=+ repeatMasking=none	-0.293706
hg19_snp151Common_rs28585613 range=chr12:122598051-122598069 5'pad=9 3'pad=9 strand=+ repeatMasking=none	0.894981
hg19_snp151Common_rs2068223 range=chr12:122716059-122716077 5'pad=9 3'pad=9 strand=+ repeatMasking=none	-0.328009
hg19_snp151Common_rs10431321 range=chr12:122743729-122743747 5'pad=9 3'pad=9 strand=+ repeatMasking=none	3.82732
hg19_snp151Common_rs76587001 range=chr12:123386933-123386951 5'pad=9 3'pad=9 strand=+ repeatMasking=none	1.89566
hg19_snp151Common_rs12310205 range=chr12:123599716-123599734 5'pad=9 3'pad=9 strand=+ repeatMasking=none	0.750734
hg19_snp151Common_rs79859086 range=chr12:124318262-124318280 5'pad=9 3'pad=9 strand=+ repeatMasking=none	-1.4527
hg19_snp151Common_rs11057384 range=chr12:124370755-124370773 5'pad=9 3'pad=9 strand=+ repeatMasking=none	0.227129
hg19_snp151Common_rs34766405 range=chr12:124533614-124533632 5'pad=9 3'pad=9 strand=+ repeatMasking=none	0.751767
hg19_snp151Common_rs61698185 range=chr12:124623616-124623634 5'pad=9 3'pad=9 strand=+ repeatMasking=none	1.77953
hg19_snp151Common_rs7308401 range=chr12:124655227-124655245 5'pad=9 3'pad=9 strand=+ repeatMasking=none	-1.41735
hg19_snp151Common_rs73223554 range=chr12:124793040-124793058 5'pad=9 3'pad=9 strand=+ repeatMasking=none	-0.349516
hg19_snp151Common_rs1244069 range=chr12:124845271-124845289 5'pad=9 3'pad=9 strand=- repeatMasking=none	2.29634
hg19_snp151Common_rs1243891 range=chr12:124931656-124931674 5'pad=9 3'pad=9 strand=+ repeatMasking=none	-0.737736
hg19_snp151Common_rs78073973 range=chr12:124962119-124962137 5'pad=9 3'pad=9 strand=+ repeatMasking=none	-0.759291
hg19_snp151Common_rs76859424 range=chr12:125212487-125212505 5'pad=9 3'pad=9 strand=+ repeatMasking=none	-1.83655
hg19_snp151Common_rs76606449 range=chr12:125305970-125305988 5'pad=9 3'pad=9 strand=+ repeatMasking=none	1.78842
hg19_snp151Common_rs12427061 range=chr12:125311925-125311943 5'pad=9 3'pad=9 strand=+ repeatMasking=none	-0.181939
hg19_snp151Common_rs187487717 range=chr12:125461292-125461310 5'pad=9 3'pad=9 strand=+ repeatMasking=none	0.326849
hg19_snp151Common_rs58237690 range=chr12:125543807-125543825 5'pad=9 3'pad=9 strand=+ repeatMasking=none	0.211177
hg19_snp151Common_rs2108521 range=chr12:126335455-126335473 5'pad=9 3'pad=9 strand=+ repeatMasking=none	2.0345
hg19_snp151Common_rs12823637 range=chr12:126353214-126353232 5'pad=9 3'pad=9 strand=+ repeatMasking=none	0.055771
hg19_snp151Common_rs114278002 range=chr12:126363434-126363452 5'pad=9 3'pad=9 strand=+ repeatMasking=none	-1.39705
hg19_snp151Common_rs11559846 range=chr12:126617333-126617351 5'pad=9 3'pad=9 strand=+ repeatMasking=none	-0.613816
hg19_snp151Common_rs11058582 range=chr12:126711797-126711815 5'pad=9 3'pad=9 strand=+ repeatMasking=none	0.010028
hg19_snp151Common_rs11058595 range=chr12:126759044-126759062 5'pad=9 3'pad=9 strand=+ repeatMasking=none	1.72165
hg19_snp151Common_rs16920638 range=chr12:126912358-126912376 5'pad=9 3'pad=9 strand=+ repeatMasking=none	-0.54012
hg19_snp151Common_rs7965931 range=chr12:126924162-126924180 5'pad=9 3'pad=9 strand=+ repeatMasking=none	-0.330496
hg19_snp151Common_rs7311521 range=chr12:126997232-126997250 5'pad=9 3'pad=9 strand=+ repeatMasking=none	1.81482
hg19_snp151Common_rs138132189 range=chr12:127081342-127081360 5'pad=9 3'pad=9 strand=+ repeatMasking=none	1.73036
hg19_snp151Common_rs59106093 range=chr12:127172785-127172803 5'pad=9 3'pad=9 strand=+ repeatMasking=none	-1.66277
hg19_snp151Common_rs529112929 range=chr12:127203104-127203122 5'pad=9 3'pad=9 strand=+ repeatMasking=none	-0.964955
hg19_snp151Common_rs114847107 range=chr12:127221906-127221924 5'pad=9 3'pad=9 strand=+ repeatMasking=none	0.092558
hg19_snp151Common_rs141963677 range=chr12:127462663-127462681 5'pad=9 3'pad=9 strand=+ repeatMasking=none	0.609229
hg19_snp151Common_rs2569809 range=chr12:127504379-127504397 5'pad=9 3'pad=9 strand=+ repeatMasking=none	0.795061
hg19_snp151Common_rs1848528 range=chr12:127705794-127705812 5'pad=9 3'pad=9 strand=+ repeatMasking=none	1.87088
hg19_snp151Common_rs116552998 range=chr12:127943340-127943358 5'pad=9 3'pad=9 strand=+ repeatMasking=none	1.73078
hg19_snp151Common_rs10847355 range=chr12:127958527-127958545 5'pad=9 3'pad=9 strand=+ repeatMasking=none	1.35302
hg19_snp151Common_rs2682617 range=chr12:127989903-127989921 5'pad=9 3'pad=9 strand=- repeatMasking=none	-0.9234
hg19_snp151Common_rs12301383 range=chr12:128011728-128011746 5'pad=9 3'pad=9 strand=+ repeatMasking=none	0.811484
hg19_snp151Common_rs36018836 range=chr12:128184772-128184789 5'pad=9 3'pad=9 strand=+ repeatMasking=none	-0.59228
hg19_snp151Common_rs1546117 range=chr12:128208804-128208822 5'pad=9 3'pad=9 strand=- repeatMasking=none	0.663153
hg19_snp151Common_rs11059374 range=chr12:128304409-128304427 5'pad=9 3'pad=9 strand=+ repeatMasking=none	0.958567
hg19_snp151Common_rs34744770 range=chr12:128498920-128498937 5'pad=9 3'pad=9 strand=+ repeatMasking=none	-0.415422
hg19_snp151Common_rs9739875 range=chr12:128581799-128581817 5'pad=9 3'pad=9 strand=+ repeatMasking=none	0.073245
hg19_snp151Common_rs116196073 range=chr12:128727257-128727275 5'pad=9 3'pad=9 strand=+ repeatMasking=none	1.14409
hg19_snp151Common_rs7975709 range=chr12:128931696-128931714 5'pad=9 3'pad=9 strand=+ repeatMasking=none	-1.25723
hg19_snp151Common_rs78390089 range=chr12:128974077-128974095 5'pad=9 3'pad=9 strand=+ repeatMasking=none	-1.89937
hg19_snp151Common_rs76779544 range=chr12:128994347-128994365 5'pad=9 3'pad=9 strand=+ repeatMasking=none	1.6022
hg19_snp151Common_rs201158075 range=chr12:129037638-129037656 5'pad=9 3'pad=9 strand=+ repeatMasking=none	-0.218498
hg19_snp151Common_rs7308126 range=chr12:129191027-129191045 5'pad=9 3'pad=9 strand=+ repeatMasking=none	2.36825
hg19_snp151Common_rs35429841 range=chr12:129273496-129273514 5'pad=9 3'pad=9 strand=+ repeatMasking=none	-0.122417
hg19_snp151Common_rs3741614 range=chr12:129298810-129298828 5'pad=9 3'pad=9 strand=+ repeatMasking=none	-0.320726
hg19_snp151Common_rs470426 range=chr12:129485859-129485877 5'pad=9 3'pad=9 strand=- repeatMasking=none	-0.285098
hg19_snp151Common_rs540912 range=chr12:129500343-129500361 5'pad=9 3'pad=9 strand=+ repeatMasking=none	-2.32621
hg19_snp151Common_rs116555440 range=chr12:129602177-129602195 5'pad=9 3'pad=9 strand=+ repeatMasking=none	1.52535
hg19_snp151Common_rs61944808 range=chr12:129620349-129620367 5'pad=9 3'pad=9 strand=+ repeatMasking=none	0.786499
hg19_snp151Common_rs74693404 range=chr12:129634959-129634977 5'pad=9 3'pad=9 strand=+ repeatMasking=none	2.17124
hg19_snp151Common_rs10847807 range=chr12:129722619-129722637 5'pad=9 3'pad=9 strand=+ repeatMasking=none	-0.288312
hg19_snp151Common_rs118066343 range=chr12:129740705-129740723 5'pad=9 3'pad=9 strand=+ repeatMasking=none	0.038948
hg19_snp151Common_rs60877564 range=chr12:129744120-129744138 5'pad=9 3'pad=9 strand=+ repeatMasking=none	3.58087
hg19_snp151Common_rs1000118 range=chr12:129762184-129762202 5'pad=9 3'pad=9 strand=+ repeatMasking=none	0.884538
hg19_snp151Common_rs7972567 range=chr12:129767343-129767361 5'pad=9 3'pad=9 strand=+ repeatMasking=none	-1.57491
hg19_snp151Common_rs111656666 range=chr12:129872329-129872347 5'pad=9 3'pad=9 strand=+ repeatMasking=none	1.9345
hg19_snp151Common_rs11285078 range=chr12:130034771-130034789 5'pad=9 3'pad=9 strand=+ repeatMasking=none	-0.312918
hg19_snp151Common_rs475255 range=chr12:130112448-130112466 5'pad=9 3'pad=9 strand=- repeatMasking=none	0.95279
hg19_snp151Common_rs264463 range=chr12:130187005-130187023 5'pad=9 3'pad=9 strand=+ repeatMasking=none	0.792308
hg19_snp151Common_rs12370126 range=chr12:130237703-130237721 5'pad=9 3'pad=9 strand=+ repeatMasking=none	-0.208977
hg19_snp151Common_rs11060572 range=chr12:130308308-130308326 5'pad=9 3'pad=9 strand=+ repeatMasking=none	-0.052755
hg19_snp151Common_rs118161709 range=chr12:130406541-130406559 5'pad=9 3'pad=9 strand=+ repeatMasking=none	-0.66746
hg19_snp151Common_rs1696405 range=chr12:130456955-130456973 5'pad=9 3'pad=9 strand=+ repeatMasking=none	-1.30479
hg19_snp151Common_rs77595701 range=chr12:130499675-130499693 5'pad=9 3'pad=9 strand=+ repeatMasking=none	-0.805291
hg19_snp151Common_rs73165633 range=chr12:130610747-130610765 5'pad=9 3'pad=9 strand=+ repeatMasking=none	-1.08489
hg19_snp151Common_rs2029936 range=chr12:130772042-130772060 5'pad=9 3'pad=9 strand=- repeatMasking=none	1.8272
hg19_snp151Common_rs79256817 range=chr12:130797795-130797813 5'pad=9 3'pad=9 strand=+ repeatMasking=none	1.43705
hg19_snp151Common_rs115880587 range=chr12:130846637-130846655 5'pad=9 3'pad=9 strand=+ repeatMasking=none	-2.42857
hg19_snp151Common_rs369673290 range=chr12:131072108-131072126 5'pad=9 3'pad=9 strand=+ repeatMasking=none	0.592803
hg19_snp151Common_rs12813236 range=chr12:131121623-131121641 5'pad=9 3'pad=9 strand=+ repeatMasking=none	-1.1763
hg19_snp151Common_rs1872867 range=chr12:131219433-131219451 5'pad=9 3'pad=9 strand=- repeatMasking=none	0.504524
hg19_snp151Common_rs4759517 range=chr12:131283689-131283707 5'pad=9 3'pad=9 strand=+ repeatMasking=none	-0.752991
hg19_snp151Common_rs116012214 range=chr12:131328162-131328180 5'pad=9 3'pad=9 strand=+ repeatMasking=none	1.58535
hg19_snp151Common_rs74511140 range=chr12:131379527-131379545 5'pad=9 3'pad=9 strand=+ repeatMasking=none	3.06829
hg19_snp151Common_rs10848346 range=chr12:131805508-131805526 5'pad=9 3'pad=9 strand=+ repeatMasking=none	-1.04366
hg19_snp151Common_rs80062816 range=chr12:132028639-132028657 5'pad=9 3'pad=9 strand=+ repeatMasking=none	-1.86447
hg19_snp151Common_rs7965123 range=chr12:132046139-132046157 5'pad=9 3'pad=9 strand=+ repeatMasking=none	-1.85675
hg19_snp151Common_rs7959669 range=chr12:132401675-132401693 5'pad=9 3'pad=9 strand=+ repeatMasking=none	1.80982
hg19_snp151Common_rs75594148 range=chr12:132413678-132413696 5'pad=9 3'pad=9 strand=+ repeatMasking=none	-0.463241
hg19_snp151Common_rs112111578 range=chr12:132519171-132519189 5'pad=9 3'pad=9 strand=+ repeatMasking=none	-0.212904
hg19_snp151Common_rs66472643 range=chr12:132598340-132598358 5'pad=9 3'pad=9 strand=+ repeatMasking=none	1.95095
hg19_snp151Common_rs61942925 range=chr12:132633261-132633279 5'pad=9 3'pad=9 strand=+ repeatMasking=none	-0.080913
hg19_snp151Common_rs12307821 range=chr12:132662946-132662964 5'pad=9 3'pad=9 strand=+ repeatMasking=none	0.861219
hg19_snp151Common_rs140856677 range=chr12:132692603-132692621 5'pad=9 3'pad=9 strand=+ repeatMasking=none	0.762749
hg19_snp151Common_rs116094904 range=chr12:132855042-132855060 5'pad=9 3'pad=9 strand=+ repeatMasking=none	-0.626637
hg19_snp151Common_rs148157595 range=chr12:132856542-132856560 5'pad=9 3'pad=9 strand=+ repeatMasking=none	-0.625591
hg19_snp151Common_rs146539821 range=chr12:132914303-132914321 5'pad=9 3'pad=9 strand=+ repeatMasking=none	0.193272
hg19_snp151Common_rs71453150 range=chr12:132977722-132977740 5'pad=9 3'pad=9 strand=+ repeatMasking=none	0.571044
hg19_snp151Common_rs75629604 range=chr12:133015418-133015436 5'pad=9 3'pad=9 strand=+ repeatMasking=none	0.45924
hg19_snp151Common_rs11147042 range=chr12:133036854-133036872 5'pad=9 3'pad=9 strand=+ repeatMasking=none	-0.212831
hg19_snp151Common_rs79228077 range=chr12:133046334-133046352 5'pad=9 3'pad=9 strand=+ repeatMasking=none	-2.45485
hg19_snp151Common_rs4883610 range=chr12:133278066-133278084 5'pad=9 3'pad=9 strand=- repeatMasking=none	0.496369
hg19_snp151Common_rs572757038 range=chr12:133421029-133421047 5'pad=9 3'pad=9 strand=+ repeatMasking=none	-0.81073
hg19_snp151Common_rs75243679 range=chr12:133727208-133727226 5'pad=9 3'pad=9 strand=+ repeatMasking=none	-1.26404
hg19_snp151Common_rs116671578 range=chr12:8371657-8371675 5'pad=9 3'pad=9 strand=+ repeatMasking=none	-0.854528
hg19_snp151Common_rs12581470 range=chr12:9464819-9464837 5'pad=9 3'pad=9 strand=+ repeatMasking=none	-0.178794
hg19_snp151Common_rs4764213 range=chr12:15747055-15747073 5'pad=9 3'pad=9 strand=+ repeatMasking=none	2.48676
hg19_snp151Common_rs11056647 range=chr12:15952138-15952156 5'pad=9 3'pad=9 strand=+ repeatMasking=none	-0.70769
hg19_snp151Common_rs73296966 range=chr12:26149362-26149380 5'pad=9 3'pad=9 strand=+ repeatMasking=none	0.793983
hg19_snp151Common_rs78391516 range=chr12:40204494-40204512 5'pad=9 3'pad=9 strand=+ repeatMasking=none	0.725015
hg19_snp151Common_rs11613035 range=chr12:41376440-41376458 5'pad=9 3'pad=9 strand=+ repeatMasking=none	4.35171
hg19_snp151Common_rs185667206 range=chr12:41554604-41554622 5'pad=9 3'pad=9 strand=+ repeatMasking=none	1.38651
hg19_snp151Common_rs188768518 range=chr12:53292948-53292966 5'pad=9 3'pad=9 strand=+ repeatMasking=none	-0.402198
hg19_snp151Common_rs1729798 range=chr12:58747669-58747687 5'pad=9 3'pad=9 strand=+ repeatMasking=none	0.08021
hg19_snp151Common_rs4556581 range=chr12:60348007-60348025 5'pad=9 3'pad=9 strand=+ repeatMasking=none	-0.088478
hg19_snp151Common_rs116095803 range=chr12:62592818-62592836 5'pad=9 3'pad=9 strand=+ repeatMasking=none	0.553759
hg19_snp151Common_rs12308455 range=chr12:62793859-62793877 5'pad=9 3'pad=9 strand=+ repeatMasking=none	0.352429
hg19_snp151Common_rs76634405 range=chr12:70753666-70753684 5'pad=9 3'pad=9 strand=+ repeatMasking=none	0.087249
hg19_snp151Common_rs2222322 range=chr12:73720173-73720191 5'pad=9 3'pad=9 strand=+ repeatMasking=none	0.908322
hg19_snp151Common_rs368247 range=chr12:78461545-78461563 5'pad=9 3'pad=9 strand=+ repeatMasking=none	0.437927
hg19_snp151Common_rs12822237 range=chr12:78554295-78554313 5'pad=9 3'pad=9 strand=+ repeatMasking=none	-2.57091
hg19_snp151Common_rs147704266 range=chr12:78687936-78687954 5'pad=9 3'pad=9 strand=+ repeatMasking=none	-0.10491
hg19_snp151Common_rs1452246 range=chr12:85168216-85168234 5'pad=9 3'pad=9 strand=- repeatMasking=none	0.633719

## Sheet: 3c_mPEAEs
SNP	Score		KRT SNP	Score	Count Less Than	p-value	Bonferroni
hg19_snp151Common_rs76578074 range=chr12:169184-169202 5'pad=9 3'pad=9 strand=+ repeatMasking=none	-1.13422		chr12:53340591-53340609	0.42808	588	0.588	8.232
hg19_snp151Common_rs59530692 range=chr12:229532-229550 5'pad=9 3'pad=9 strand=+ repeatMasking=none	1.78802		chr12:53344309-53344327	-3.68411	9	0.009	0.126
hg19_snp151Common_rs118157961 range=chr12:279730-279748 5'pad=9 3'pad=9 strand=+ repeatMasking=none	-2.66469		chr12:53346741-53346759	-2.25469	83	0.083	1.162
hg19_snp151Common_rs78101097 range=chr12:328719-328737 5'pad=9 3'pad=9 strand=+ repeatMasking=none	0.328926		chr12:53351199-53351217	0.257642	549	0.549	7.686
hg19_snp151Common_rs12306188 range=chr12:424700-424718 5'pad=9 3'pad=9 strand=+ repeatMasking=none	-0.69555		chr12:53352563-53352581	2.62755	935	0.935	13.09
hg19_snp151Common_rs35882350 range=chr12:623120-623138 5'pad=9 3'pad=9 strand=+ repeatMasking=none	-1.32202		chr12:53353401-53353419	-0.568602	358	0.358	5.012
hg19_snp151Common_rs77353687 range=chr12:728360-728378 5'pad=9 3'pad=9 strand=+ repeatMasking=none	-2.28115		chr12:53353750-53353768	1.34053	770	0.77	10.78
hg19_snp151Common_rs7966632 range=chr12:903849-903867 5'pad=9 3'pad=9 strand=+ repeatMasking=none	-0.066401		chr12:53354613-53354631	-1.39388	200	0.2	2.8
hg19_snp151Common_rs16928264 range=chr12:1301225-1301243 5'pad=9 3'pad=9 strand=+ repeatMasking=none	-0.829988		chr12:53355548-53355566	-0.74012	316	0.316	4.424
hg19_snp151Common_rs7968604 range=chr12:1382173-1382191 5'pad=9 3'pad=9 strand=+ repeatMasking=none	-2.83919		chr12:53355670-53355688	0.699548	651	0.651	9.114
hg19_snp151Common_rs7297773 range=chr12:1423339-1423357 5'pad=9 3'pad=9 strand=+ repeatMasking=none	1.97445		chr12:53357326-53357344	0.528068	609	0.609	8.526
hg19_snp151Common_rs11834069 range=chr12:1606696-1606714 5'pad=9 3'pad=9 strand=+ repeatMasking=none	1.4849		chr12:53358025-53358043	2.07084	864	0.864	12.096
hg19_snp151Common_rs80100851 range=chr12:1663910-1663928 5'pad=9 3'pad=9 strand=+ repeatMasking=none	-0.496835		chr12:53359109-53359127	-0.797158	304	0.304	4.256
hg19_snp151Common_rs115873398 range=chr12:1734598-1734616 5'pad=9 3'pad=9 strand=+ repeatMasking=none	-0.409448		chr12:53360522-53360540	-0.975614	269	0.269	3.766
hg19_snp151Common_rs148891284 range=chr12:1786695-1786713 5'pad=9 3'pad=9 strand=+ repeatMasking=none	0.898555
hg19_snp151Common_rs116283324 range=chr12:2088769-2088787 5'pad=9 3'pad=9 strand=+ repeatMasking=none	2.23098
hg19_snp151Common_rs115322336 range=chr12:2175686-2175704 5'pad=9 3'pad=9 strand=+ repeatMasking=none	1.80175
hg19_snp151Common_rs4126711 range=chr12:2227302-2227320 5'pad=9 3'pad=9 strand=- repeatMasking=none	-0.29083
hg19_snp151Common_rs7974565 range=chr12:2271229-2271247 5'pad=9 3'pad=9 strand=+ repeatMasking=none	0.44391
hg19_snp151Common_rs114173791 range=chr12:2442746-2442764 5'pad=9 3'pad=9 strand=+ repeatMasking=none	2.40586
hg19_snp151Common_rs11062231 range=chr12:2552971-2552989 5'pad=9 3'pad=9 strand=+ repeatMasking=none	-3.13687
hg19_snp151Common_rs4765695 range=chr12:2648494-2648512 5'pad=9 3'pad=9 strand=+ repeatMasking=none	-1.35789
hg19_snp151Common_rs4394887 range=chr12:2649971-2649989 5'pad=9 3'pad=9 strand=+ repeatMasking=none	-1.41559
hg19_snp151Common_rs112699940 range=chr12:2698949-2698967 5'pad=9 3'pad=9 strand=+ repeatMasking=none	0.80715
hg19_snp151Common_rs112108361 range=chr12:2734188-2734206 5'pad=9 3'pad=9 strand=+ repeatMasking=none	0.975802
hg19_snp151Common_rs536704630 range=chr12:2755944-2755962 5'pad=9 3'pad=9 strand=+ repeatMasking=none	-1.65688
hg19_snp151Common_rs116690998 range=chr12:2890484-2890502 5'pad=9 3'pad=9 strand=+ repeatMasking=none	-0.099438
hg19_snp151Common_rs10848736 range=chr12:3019478-3019496 5'pad=9 3'pad=9 strand=+ repeatMasking=none	3.42489
hg19_snp151Common_rs77692554 range=chr12:3122546-3122564 5'pad=9 3'pad=9 strand=+ repeatMasking=none	1.07994
hg19_snp151Common_rs11062460 range=chr12:3128446-3128464 5'pad=9 3'pad=9 strand=+ repeatMasking=none	-0.289132
hg19_snp151Common_rs10848779 range=chr12:3178499-3178517 5'pad=9 3'pad=9 strand=+ repeatMasking=none	-1.75171
hg19_snp151Common_rs10744596 range=chr12:3266480-3266498 5'pad=9 3'pad=9 strand=+ repeatMasking=none	0.840385
hg19_snp151Common_rs733851 range=chr12:3293834-3293852 5'pad=9 3'pad=9 strand=- repeatMasking=none	2.53349
hg19_snp151Common_rs61907328 range=chr12:3324408-3324426 5'pad=9 3'pad=9 strand=+ repeatMasking=none	1.72093
hg19_snp151Common_rs10774146 range=chr12:3530005-3530023 5'pad=9 3'pad=9 strand=+ repeatMasking=none	0.225322
hg19_snp151Common_rs56347191 range=chr12:3617457-3617475 5'pad=9 3'pad=9 strand=+ repeatMasking=none	-1.71099
hg19_snp151Common_rs73047300 range=chr12:3783229-3783247 5'pad=9 3'pad=9 strand=+ repeatMasking=none	1.10446
hg19_snp151Common_rs7980338 range=chr12:4351309-4351327 5'pad=9 3'pad=9 strand=+ repeatMasking=none	1.10571
hg19_snp151Common_rs3217848 range=chr12:4396737-4396755 5'pad=9 3'pad=9 strand=+ repeatMasking=none	-3.08408
hg19_snp151Common_rs9737706 range=chr12:4428836-4428854 5'pad=9 3'pad=9 strand=+ repeatMasking=none	0.598434
hg19_snp151Common_rs111632733 range=chr12:4450244-4450262 5'pad=9 3'pad=9 strand=+ repeatMasking=none	-0.281269
hg19_snp151Common_rs2359249 range=chr12:4685435-4685453 5'pad=9 3'pad=9 strand=+ repeatMasking=none	0.880233
hg19_snp151Common_rs150244543 range=chr12:4823490-4823508 5'pad=9 3'pad=9 strand=+ repeatMasking=none	0.811477
hg19_snp151Common_rs114589167 range=chr12:5131115-5131133 5'pad=9 3'pad=9 strand=+ repeatMasking=none	0.740101
hg19_snp151Common_rs4415841 range=chr12:5376444-5376462 5'pad=9 3'pad=9 strand=+ repeatMasking=none	-0.880538
hg19_snp151Common_rs1549036 range=chr12:5559371-5559389 5'pad=9 3'pad=9 strand=- repeatMasking=none	-0.30234
hg19_snp151Common_rs10744691 range=chr12:5793102-5793120 5'pad=9 3'pad=9 strand=+ repeatMasking=none	0.043117
hg19_snp151Common_rs75161895 range=chr12:5863259-5863277 5'pad=9 3'pad=9 strand=+ repeatMasking=none	-0.439489
hg19_snp151Common_rs7485896 range=chr12:5938437-5938455 5'pad=9 3'pad=9 strand=+ repeatMasking=none	-0.997543
hg19_snp151Common_rs11063972 range=chr12:6093477-6093495 5'pad=9 3'pad=9 strand=+ repeatMasking=none	-0.039461
hg19_snp151Common_rs75361962 range=chr12:6146122-6146140 5'pad=9 3'pad=9 strand=+ repeatMasking=none	-2.50688
hg19_snp151Common_rs12299007 range=chr12:6249287-6249305 5'pad=9 3'pad=9 strand=+ repeatMasking=none	0.999148
hg19_snp151Common_rs753951308 range=chr12:6414638-6414656 5'pad=9 3'pad=9 strand=+ repeatMasking=none	0.606825
hg19_snp151Common_rs79284737 range=chr12:6504330-6504348 5'pad=9 3'pad=9 strand=+ repeatMasking=none	-0.031372
hg19_snp151Common_rs73270520 range=chr12:7453520-7453538 5'pad=9 3'pad=9 strand=+ repeatMasking=none	0.795823
hg19_snp151Common_rs74717164 range=chr12:7546668-7546686 5'pad=9 3'pad=9 strand=+ repeatMasking=none	-1.49166
hg19_snp151Common_rs190548214 range=chr12:7751239-7751257 5'pad=9 3'pad=9 strand=+ repeatMasking=none	0.594446
hg19_snp151Common_rs11055158 range=chr12:7825126-7825144 5'pad=9 3'pad=9 strand=+ repeatMasking=none	-0.528566
hg19_snp151Common_rs4883438 range=chr12:7875291-7875309 5'pad=9 3'pad=9 strand=+ repeatMasking=none	4.1258
hg19_snp151Common_rs59456898 range=chr12:7948943-7948960 5'pad=9 3'pad=9 strand=+ repeatMasking=none	-2.80533
hg19_snp151Common_rs113535859 range=chr12:8294851-8294869 5'pad=9 3'pad=9 strand=+ repeatMasking=none	-0.176753
hg19_snp151Common_rs10770465 range=chr12:8460330-8460348 5'pad=9 3'pad=9 strand=+ repeatMasking=none	-1.63854
hg19_snp151Common_rs148514066 range=chr12:8539004-8539022 5'pad=9 3'pad=9 strand=+ repeatMasking=none	-0.065151
hg19_snp151Common_rs4242893 range=chr12:8630920-8630938 5'pad=9 3'pad=9 strand=+ repeatMasking=none	-2.46322
hg19_snp151Common_rs7307228 range=chr12:8688066-8688084 5'pad=9 3'pad=9 strand=+ repeatMasking=none	1.79728
hg19_snp151Common_rs74741051 range=chr12:8709506-8709524 5'pad=9 3'pad=9 strand=+ repeatMasking=none	-0.654888
hg19_snp151Common_rs7313614 range=chr12:8875399-8875417 5'pad=9 3'pad=9 strand=+ repeatMasking=none	0.472444
hg19_snp151Common_rs73251237 range=chr12:8986446-8986464 5'pad=9 3'pad=9 strand=+ repeatMasking=none	0.116331
hg19_snp151Common_rs2058428 range=chr12:9747504-9747522 5'pad=9 3'pad=9 strand=- repeatMasking=none	-0.321997
hg19_snp151Common_rs17732655 range=chr12:9752088-9752106 5'pad=9 3'pad=9 strand=+ repeatMasking=none	-1.17697
hg19_snp151Common_rs10844269 range=chr12:9796862-9796880 5'pad=9 3'pad=9 strand=+ repeatMasking=none	2.66274
hg19_snp151Common_rs75257215 range=chr12:9843968-9843986 5'pad=9 3'pad=9 strand=+ repeatMasking=none	1.7643
hg19_snp151Common_rs12371981 range=chr12:9856433-9856451 5'pad=9 3'pad=9 strand=+ repeatMasking=none	1.16582
hg19_snp151Common_rs776127859 range=chr12:9960717-9960735 5'pad=9 3'pad=9 strand=+ repeatMasking=none	-1.36877
hg19_snp151Common_rs79254621 range=chr12:10431099-10431117 5'pad=9 3'pad=9 strand=+ repeatMasking=none	0.843089
hg19_snp151Common_rs74821572 range=chr12:10496133-10496151 5'pad=9 3'pad=9 strand=+ repeatMasking=none	-0.411578
hg19_snp151Common_rs10772323 range=chr12:10733690-10733708 5'pad=9 3'pad=9 strand=+ repeatMasking=none	0.564547
hg19_snp151Common_rs34964378 range=chr12:10785509-10785526 5'pad=9 3'pad=9 strand=+ repeatMasking=none	0.160238
hg19_snp151Common_rs4763569 range=chr12:10792320-10792338 5'pad=9 3'pad=9 strand=+ repeatMasking=none	1.2882
hg19_snp151Common_rs78381270 range=chr12:10840165-10840183 5'pad=9 3'pad=9 strand=+ repeatMasking=none	0.722066
hg19_snp151Common_rs73046589 range=chr12:10944113-10944131 5'pad=9 3'pad=9 strand=+ repeatMasking=none	-1.08297
hg19_snp151Common_rs11054088 range=chr12:11115517-11115535 5'pad=9 3'pad=9 strand=+ repeatMasking=none	-0.412951
hg19_snp151Common_rs10772405 range=chr12:11145817-11145835 5'pad=9 3'pad=9 strand=+ repeatMasking=none	-1.26581
hg19_snp151Common_rs777303558 range=chr12:11214486-11214504 5'pad=9 3'pad=9 strand=+ repeatMasking=none	1.22712
hg19_snp151Common_rs114788163 range=chr12:11550356-11550374 5'pad=9 3'pad=9 strand=+ repeatMasking=none	-1.15559
hg19_snp151Common_rs73056812 range=chr12:11609568-11609586 5'pad=9 3'pad=9 strand=+ repeatMasking=none	-2.30308
hg19_snp151Common_rs12831430 range=chr12:11620585-11620603 5'pad=9 3'pad=9 strand=+ repeatMasking=none	-1.68741
hg19_snp151Common_rs141655374 range=chr12:11692584-11692602 5'pad=9 3'pad=9 strand=+ repeatMasking=none	-1.7295
hg19_snp151Common_rs12300254 range=chr12:11755099-11755117 5'pad=9 3'pad=9 strand=+ repeatMasking=none	0.454396
hg19_snp151Common_rs60711165 range=chr12:11860682-11860700 5'pad=9 3'pad=9 strand=+ repeatMasking=none	1.00799
hg19_snp151Common_rs10772501 range=chr12:11877264-11877282 5'pad=9 3'pad=9 strand=+ repeatMasking=none	-1.1519
hg19_snp151Common_rs17745932 range=chr12:11893148-11893166 5'pad=9 3'pad=9 strand=+ repeatMasking=none	5.82157
hg19_snp151Common_rs12229652 range=chr12:12102103-12102121 5'pad=9 3'pad=9 strand=+ repeatMasking=none	1.35225
hg19_snp151Common_rs1641729 range=chr12:12251143-12251161 5'pad=9 3'pad=9 strand=+ repeatMasking=none	-0.558536
hg19_snp151Common_rs6488517 range=chr12:12515057-12515075 5'pad=9 3'pad=9 strand=+ repeatMasking=none	0.099648
hg19_snp151Common_rs114270120 range=chr12:12606709-12606727 5'pad=9 3'pad=9 strand=+ repeatMasking=none	4.91729
hg19_snp151Common_rs10845558 range=chr12:12642326-12642344 5'pad=9 3'pad=9 strand=+ repeatMasking=none	1.94901
hg19_snp151Common_rs1291356 range=chr12:13157931-13157949 5'pad=9 3'pad=9 strand=- repeatMasking=none	-1.30972
hg19_snp151Common_rs12427224 range=chr12:13267694-13267712 5'pad=9 3'pad=9 strand=+ repeatMasking=none	-0.391694
hg19_snp151Common_rs6488590 range=chr12:13288837-13288855 5'pad=9 3'pad=9 strand=+ repeatMasking=none	-1.48156
hg19_snp151Common_rs75099364 range=chr12:13310549-13310567 5'pad=9 3'pad=9 strand=+ repeatMasking=none	1.1033
hg19_snp151Common_rs7968135 range=chr12:13344973-13344991 5'pad=9 3'pad=9 strand=+ repeatMasking=none	-1.13084
hg19_snp151Common_rs879111 range=chr12:13410258-13410276 5'pad=9 3'pad=9 strand=- repeatMasking=none	2.40942
hg19_snp151Common_rs10772657 range=chr12:13503872-13503890 5'pad=9 3'pad=9 strand=+ repeatMasking=none	-0.526759
hg19_snp151Common_rs7308685 range=chr12:13526296-13526314 5'pad=9 3'pad=9 strand=+ repeatMasking=none	-1.43617
hg19_snp151Common_rs4763343 range=chr12:13564953-13564971 5'pad=9 3'pad=9 strand=+ repeatMasking=none	2.67722
hg19_snp151Common_rs7970407 range=chr12:13876841-13876859 5'pad=9 3'pad=9 strand=+ repeatMasking=none	1.56731
hg19_snp151Common_rs116317074 range=chr12:13886985-13887003 5'pad=9 3'pad=9 strand=+ repeatMasking=none	2.31595
hg19_snp151Common_rs73055672 range=chr12:13995224-13995242 5'pad=9 3'pad=9 strand=+ repeatMasking=none	0.355555
hg19_snp151Common_rs73296763 range=chr12:14024149-14024167 5'pad=9 3'pad=9 strand=+ repeatMasking=none	3.46151
hg19_snp151Common_rs61921177 range=chr12:14216587-14216605 5'pad=9 3'pad=9 strand=+ repeatMasking=none	-1.21403
hg19_snp151Common_rs150055605 range=chr12:14233002-14233020 5'pad=9 3'pad=9 strand=+ repeatMasking=none	1.20358
hg19_snp151Common_rs7958962 range=chr12:14265643-14265661 5'pad=9 3'pad=9 strand=+ repeatMasking=none	-1.6925
hg19_snp151Common_rs12368467 range=chr12:14289737-14289755 5'pad=9 3'pad=9 strand=+ repeatMasking=none	0.640509
hg19_snp151Common_rs149070299 range=chr12:14533764-14533782 5'pad=9 3'pad=9 strand=+ repeatMasking=none	-0.735456
hg19_snp151Common_rs111695839 range=chr12:14770958-14770976 5'pad=9 3'pad=9 strand=+ repeatMasking=none	0.332971
hg19_snp151Common_rs11056067 range=chr12:14776552-14776570 5'pad=9 3'pad=9 strand=+ repeatMasking=none	2.746
hg19_snp151Common_rs7296937 range=chr12:14786402-14786420 5'pad=9 3'pad=9 strand=+ repeatMasking=none	-0.418404
hg19_snp151Common_rs17834491 range=chr12:14963331-14963349 5'pad=9 3'pad=9 strand=+ repeatMasking=none	2.21362
hg19_snp151Common_rs12305613 range=chr12:15077211-15077229 5'pad=9 3'pad=9 strand=+ repeatMasking=none	-1.18071
hg19_snp151Common_rs16910453 range=chr12:15129382-15129400 5'pad=9 3'pad=9 strand=+ repeatMasking=none	-1.00608
hg19_snp151Common_rs7301508 range=chr12:15135222-15135240 5'pad=9 3'pad=9 strand=+ repeatMasking=none	-1.98618
hg19_snp151Common_rs78231610 range=chr12:15144702-15144720 5'pad=9 3'pad=9 strand=+ repeatMasking=none	2.52048
hg19_snp151Common_rs34639088 range=chr12:15223678-15223696 5'pad=9 3'pad=9 strand=+ repeatMasking=none	-2.05854
hg19_snp151Common_rs28444248 range=chr12:15259011-15259029 5'pad=9 3'pad=9 strand=+ repeatMasking=none	-1.54099
hg19_snp151Common_rs117772953 range=chr12:15339534-15339552 5'pad=9 3'pad=9 strand=+ repeatMasking=none	-0.800485
hg19_snp151Common_rs73301699 range=chr12:15540995-15541013 5'pad=9 3'pad=9 strand=+ repeatMasking=none	0.527803
hg19_snp151Common_rs80279996 range=chr12:15820137-15820155 5'pad=9 3'pad=9 strand=+ repeatMasking=none	-0.83894
hg19_snp151Common_rs201711567 range=chr12:15928539-15928556 5'pad=9 3'pad=9 strand=+ repeatMasking=none	-0.625327
hg19_snp151Common_rs113432196 range=chr12:15966067-15966085 5'pad=9 3'pad=9 strand=+ repeatMasking=none	-1.94469
hg19_snp151Common_rs34785407 range=chr12:16357433-16357451 5'pad=9 3'pad=9 strand=+ repeatMasking=none	-1.74734
hg19_snp151Common_rs11056885 range=chr12:16484939-16484957 5'pad=9 3'pad=9 strand=+ repeatMasking=none	2.34694
hg19_snp151Common_rs75932174 range=chr12:16736225-16736243 5'pad=9 3'pad=9 strand=+ repeatMasking=none	-0.627955
hg19_snp151Common_rs10846445 range=chr12:16977467-16977485 5'pad=9 3'pad=9 strand=+ repeatMasking=none	-0.220653
hg19_snp151Common_rs150531042 range=chr12:17272119-17272137 5'pad=9 3'pad=9 strand=+ repeatMasking=none	1.37367
hg19_snp151Common_rs142395769 range=chr12:17364685-17364703 5'pad=9 3'pad=9 strand=+ repeatMasking=none	-2.28098
hg19_snp151Common_rs10840723 range=chr12:17630197-17630215 5'pad=9 3'pad=9 strand=+ repeatMasking=none	1.15612
hg19_snp151Common_rs4764346 range=chr12:17868533-17868551 5'pad=9 3'pad=9 strand=+ repeatMasking=none	-1.92483
hg19_snp151Common_rs12813320 range=chr12:17884767-17884785 5'pad=9 3'pad=9 strand=+ repeatMasking=none	-0.419963
hg19_snp151Common_rs35328981 range=chr12:17907775-17907792 5'pad=9 3'pad=9 strand=+ repeatMasking=none	1.47854
hg19_snp151Common_rs151332178 range=chr12:18085650-18085668 5'pad=9 3'pad=9 strand=+ repeatMasking=none	-2.07239
hg19_snp151Common_rs78558982 range=chr12:18134223-18134241 5'pad=9 3'pad=9 strand=+ repeatMasking=none	-0.741113
hg19_snp151Common_rs118001010 range=chr12:18388709-18388727 5'pad=9 3'pad=9 strand=+ repeatMasking=none	-0.573414
hg19_snp151Common_rs78426992 range=chr12:18553211-18553229 5'pad=9 3'pad=9 strand=+ repeatMasking=none	0.536898
hg19_snp151Common_rs74070259 range=chr12:18570933-18570951 5'pad=9 3'pad=9 strand=+ repeatMasking=none	-0.315752
hg19_snp151Common_rs732669 range=chr12:18607695-18607713 5'pad=9 3'pad=9 strand=+ repeatMasking=none	3.46255
hg19_snp151Common_rs34743372 range=chr12:18634025-18634043 5'pad=9 3'pad=9 strand=+ repeatMasking=none	0.653646
hg19_snp151Common_rs74070280 range=chr12:18638254-18638272 5'pad=9 3'pad=9 strand=+ repeatMasking=none	0.578828
hg19_snp151Common_rs668502 range=chr12:18811679-18811697 5'pad=9 3'pad=9 strand=+ repeatMasking=none	1.028
hg19_snp151Common_rs117168184 range=chr12:18856747-18856765 5'pad=9 3'pad=9 strand=+ repeatMasking=none	-1.27415
hg19_snp151Common_rs76831606 range=chr12:19022568-19022586 5'pad=9 3'pad=9 strand=+ repeatMasking=none	-0.006592
hg19_snp151Common_rs76466093 range=chr12:19118347-19118365 5'pad=9 3'pad=9 strand=+ repeatMasking=none	0.111075
hg19_snp151Common_rs148121190 range=chr12:19469362-19469379 5'pad=9 3'pad=9 strand=+ repeatMasking=none	0.310932
hg19_snp151Common_rs7296155 range=chr12:19679386-19679404 5'pad=9 3'pad=9 strand=+ repeatMasking=none	2.34476
hg19_snp151Common_rs11611955 range=chr12:19934310-19934328 5'pad=9 3'pad=9 strand=+ repeatMasking=none	-2.19419
hg19_snp151Common_rs1918279 range=chr12:19935551-19935569 5'pad=9 3'pad=9 strand=+ repeatMasking=none	1.25773
hg19_snp151Common_rs6487052 range=chr12:20065487-20065505 5'pad=9 3'pad=9 strand=+ repeatMasking=none	2.6085
hg19_snp151Common_rs10841408 range=chr12:20076282-20076300 5'pad=9 3'pad=9 strand=+ repeatMasking=none	-0.018367
hg19_snp151Common_rs2728637 range=chr12:20128203-20128221 5'pad=9 3'pad=9 strand=- repeatMasking=none	-2.60517
hg19_snp151Common_rs4762911 range=chr12:20160737-20160755 5'pad=9 3'pad=9 strand=+ repeatMasking=none	-1.49813
hg19_snp151Common_rs55701131 range=chr12:20251030-20251048 5'pad=9 3'pad=9 strand=+ repeatMasking=none	-0.662664
hg19_snp151Common_rs74508296 range=chr12:20387024-20387042 5'pad=9 3'pad=9 strand=+ repeatMasking=none	-0.789355
hg19_snp151Common_rs77801890 range=chr12:20461621-20461639 5'pad=9 3'pad=9 strand=+ repeatMasking=none	-1.16976
hg19_snp151Common_rs10743365 range=chr12:20526550-20526568 5'pad=9 3'pad=9 strand=+ repeatMasking=none	-0.589106
hg19_snp151Common_rs60593141 range=chr12:20531325-20531343 5'pad=9 3'pad=9 strand=+ repeatMasking=none	0.83558
hg19_snp151Common_rs117429885 range=chr12:20590054-20590072 5'pad=9 3'pad=9 strand=+ repeatMasking=none	-1.68469
hg19_snp151Common_rs59022244 range=chr12:20805354-20805372 5'pad=9 3'pad=9 strand=+ repeatMasking=none	-1.10559
hg19_snp151Common_rs11045524 range=chr12:20965780-20965798 5'pad=9 3'pad=9 strand=+ repeatMasking=none	-3.57247
hg19_snp151Common_rs12317610 range=chr12:20970773-20970791 5'pad=9 3'pad=9 strand=+ repeatMasking=none	-0.107776
hg19_snp151Common_rs4387401 range=chr12:21006706-21006724 5'pad=9 3'pad=9 strand=+ repeatMasking=none	0.288809
hg19_snp151Common_rs143746605 range=chr12:21183710-21183728 5'pad=9 3'pad=9 strand=+ repeatMasking=none	3.16603
hg19_snp151Common_rs7311343 range=chr12:21228772-21228790 5'pad=9 3'pad=9 strand=+ repeatMasking=none	0.632554
hg19_snp151Common_rs73241801 range=chr12:21242992-21243010 5'pad=9 3'pad=9 strand=+ repeatMasking=none	-0.030039
hg19_snp151Common_rs75924117 range=chr12:21294791-21294809 5'pad=9 3'pad=9 strand=+ repeatMasking=none	-0.722019
hg19_snp151Common_rs7136445 range=chr12:21324739-21324757 5'pad=9 3'pad=9 strand=+ repeatMasking=none	-0.407232
hg19_snp151Common_rs144019604 range=chr12:21407201-21407219 5'pad=9 3'pad=9 strand=+ repeatMasking=none	-0.180469
hg19_snp151Common_rs10841786 range=chr12:21443273-21443291 5'pad=9 3'pad=9 strand=+ repeatMasking=none	-0.893561
hg19_snp151Common_rs10841827 range=chr12:21621808-21621826 5'pad=9 3'pad=9 strand=+ repeatMasking=none	1.1523
hg19_snp151Common_rs1580300 range=chr12:21701141-21701159 5'pad=9 3'pad=9 strand=- repeatMasking=none	0.535837
hg19_snp151Common_rs16924062 range=chr12:21768200-21768218 5'pad=9 3'pad=9 strand=+ repeatMasking=none	1.04279
hg19_snp151Common_rs4148680 range=chr12:21958990-21959008 5'pad=9 3'pad=9 strand=- repeatMasking=none	0.176951
hg19_snp151Common_rs77732183 range=chr12:22003031-22003049 5'pad=9 3'pad=9 strand=+ repeatMasking=none	1.74199
hg19_snp151Common_rs704210 range=chr12:22043860-22043878 5'pad=9 3'pad=9 strand=- repeatMasking=none	-1.32403
hg19_snp151Common_rs9706519 range=chr12:22187403-22187421 5'pad=9 3'pad=9 strand=+ repeatMasking=none	-0.866818
hg19_snp151Common_rs200304101 range=chr12:22346681-22346699 5'pad=9 3'pad=9 strand=+ repeatMasking=none	4.78874
hg19_snp151Common_rs140675748 range=chr12:22421549-22421566 5'pad=9 3'pad=9 strand=+ repeatMasking=none	-0.213937
hg19_snp151Common_rs7970824 range=chr12:22482429-22482447 5'pad=9 3'pad=9 strand=+ repeatMasking=none	-3.08652
hg19_snp151Common_rs6487311 range=chr12:22687074-22687092 5'pad=9 3'pad=9 strand=+ repeatMasking=none	0.252656
hg19_snp151Common_rs73082538 range=chr12:22851547-22851565 5'pad=9 3'pad=9 strand=+ repeatMasking=none	1.1322
hg19_snp151Common_rs73269352 range=chr12:23017791-23017809 5'pad=9 3'pad=9 strand=+ repeatMasking=none	0.270735
hg19_snp151Common_rs2141567 range=chr12:23250925-23250943 5'pad=9 3'pad=9 strand=- repeatMasking=none	0.864817
hg19_snp151Common_rs2446028 range=chr12:23253232-23253250 5'pad=9 3'pad=9 strand=+ repeatMasking=none	0.634779
hg19_snp151Common_rs79429474 range=chr12:23312727-23312745 5'pad=9 3'pad=9 strand=+ repeatMasking=none	1.24116
hg19_snp151Common_rs59801278 range=chr12:23366449-23366467 5'pad=9 3'pad=9 strand=+ repeatMasking=none	-1.81315
hg19_snp151Common_rs4520640 range=chr12:23433451-23433469 5'pad=9 3'pad=9 strand=+ repeatMasking=none	1.62446
hg19_snp151Common_rs75591463 range=chr12:23446291-23446309 5'pad=9 3'pad=9 strand=+ repeatMasking=none	0.954467
hg19_snp151Common_rs10734725 range=chr12:23573827-23573845 5'pad=9 3'pad=9 strand=+ repeatMasking=none	-1.22478
hg19_snp151Common_rs145763863 range=chr12:23673998-23674016 5'pad=9 3'pad=9 strand=+ repeatMasking=none	-0.701271
hg19_snp151Common_rs117141304 range=chr12:23824355-23824373 5'pad=9 3'pad=9 strand=+ repeatMasking=none	-2.19447
hg19_snp151Common_rs11833903 range=chr12:23862682-23862700 5'pad=9 3'pad=9 strand=+ repeatMasking=none	1.04109
hg19_snp151Common_rs116241957 range=chr12:23892431-23892449 5'pad=9 3'pad=9 strand=+ repeatMasking=none	2.89384
hg19_snp151Common_rs111592523 range=chr12:23984439-23984457 5'pad=9 3'pad=9 strand=+ repeatMasking=none	0.665473
hg19_snp151Common_rs12319752 range=chr12:23985689-23985707 5'pad=9 3'pad=9 strand=+ repeatMasking=none	0.941
hg19_snp151Common_rs10505913 range=chr12:24043641-24043659 5'pad=9 3'pad=9 strand=+ repeatMasking=none	-1.62855
hg19_snp151Common_rs10505931 range=chr12:24194786-24194804 5'pad=9 3'pad=9 strand=+ repeatMasking=none	1.62949
hg19_snp151Common_rs117907734 range=chr12:24244961-24244979 5'pad=9 3'pad=9 strand=+ repeatMasking=none	-0.174289
hg19_snp151Common_rs35157827 range=chr12:24437452-24437470 5'pad=9 3'pad=9 strand=+ repeatMasking=none	0.11439
hg19_snp151Common_rs114018973 range=chr12:24467639-24467657 5'pad=9 3'pad=9 strand=+ repeatMasking=none	1.95188
hg19_snp151Common_rs4963786 range=chr12:24887282-24887300 5'pad=9 3'pad=9 strand=+ repeatMasking=none	-1.68543
hg19_snp151Common_rs79130412 range=chr12:24939915-24939933 5'pad=9 3'pad=9 strand=+ repeatMasking=none	0.864435
hg19_snp151Common_rs147064884 range=chr12:25012363-25012381 5'pad=9 3'pad=9 strand=+ repeatMasking=none	-0.025067
hg19_snp151Common_rs699033 range=chr12:25151218-25151236 5'pad=9 3'pad=9 strand=+ repeatMasking=none	1.21792
hg19_snp151Common_rs35755130 range=chr12:25435516-25435534 5'pad=9 3'pad=9 strand=+ repeatMasking=none	-0.759127
hg19_snp151Common_rs143518652 range=chr12:25576234-25576252 5'pad=9 3'pad=9 strand=+ repeatMasking=none	0.15696
hg19_snp151Common_rs74073907 range=chr12:25593769-25593787 5'pad=9 3'pad=9 strand=+ repeatMasking=none	1.43125
hg19_snp151Common_rs34944742 range=chr12:25608862-25608880 5'pad=9 3'pad=9 strand=+ repeatMasking=none	0.022422
hg19_snp151Common_rs73287214 range=chr12:26013886-26013904 5'pad=9 3'pad=9 strand=+ repeatMasking=none	-3.72329
hg19_snp151Common_rs11048312 range=chr12:26024417-26024435 5'pad=9 3'pad=9 strand=+ repeatMasking=none	1.26594
hg19_snp151Common_rs2198589 range=chr12:26029303-26029321 5'pad=9 3'pad=9 strand=+ repeatMasking=none	-1.91865
hg19_snp151Common_rs10505985 range=chr12:26035833-26035851 5'pad=9 3'pad=9 strand=+ repeatMasking=none	0.822409
hg19_snp151Common_rs55768874 range=chr12:26074562-26074580 5'pad=9 3'pad=9 strand=+ repeatMasking=none	6.01159
hg19_snp151Common_rs6487520 range=chr12:26116585-26116603 5'pad=9 3'pad=9 strand=+ repeatMasking=none	0.520293
hg19_snp151Common_rs114238638 range=chr12:26326358-26326376 5'pad=9 3'pad=9 strand=+ repeatMasking=none	0.287042
hg19_snp151Common_rs2063632 range=chr12:26511759-26511777 5'pad=9 3'pad=9 strand=- repeatMasking=none	2.81698
hg19_snp151Common_rs12826706 range=chr12:26639552-26639570 5'pad=9 3'pad=9 strand=+ repeatMasking=none	1.61283
hg19_snp151Common_rs76956075 range=chr12:26857756-26857774 5'pad=9 3'pad=9 strand=+ repeatMasking=none	-2.04623
hg19_snp151Common_rs113702245 range=chr12:27001998-27002016 5'pad=9 3'pad=9 strand=+ repeatMasking=none	-4.01912
hg19_snp151Common_rs12318803 range=chr12:27023788-27023806 5'pad=9 3'pad=9 strand=+ repeatMasking=none	1.75456
hg19_snp151Common_rs841612 range=chr12:27289478-27289496 5'pad=9 3'pad=9 strand=- repeatMasking=none	-1.94933
hg19_snp151Common_rs149037992 range=chr12:27292471-27292489 5'pad=9 3'pad=9 strand=+ repeatMasking=none	2.43476
hg19_snp151Common_rs12311660 range=chr12:27517832-27517850 5'pad=9 3'pad=9 strand=+ repeatMasking=none	3.94655
hg19_snp151Common_rs68168722 range=chr12:27701039-27701057 5'pad=9 3'pad=9 strand=+ repeatMasking=none	0.544587
hg19_snp151Common_rs139359429 range=chr12:27837294-27837312 5'pad=9 3'pad=9 strand=+ repeatMasking=none	0.393948
hg19_snp151Common_rs11049187 range=chr12:27990488-27990506 5'pad=9 3'pad=9 strand=+ repeatMasking=none	3.01833
hg19_snp151Common_rs10843151 range=chr12:28471310-28471328 5'pad=9 3'pad=9 strand=+ repeatMasking=none	-0.205266
hg19_snp151Common_rs111230494 range=chr12:28486986-28487004 5'pad=9 3'pad=9 strand=+ repeatMasking=none	4.88459
hg19_snp151Common_rs11049736 range=chr12:28761348-28761366 5'pad=9 3'pad=9 strand=+ repeatMasking=none	-0.492852
hg19_snp151Common_rs76444125 range=chr12:28773533-28773551 5'pad=9 3'pad=9 strand=+ repeatMasking=none	-1.61177
hg19_snp151Common_rs79112152 range=chr12:29136145-29136163 5'pad=9 3'pad=9 strand=+ repeatMasking=none	3.88842
hg19_snp151Common_rs12311115 range=chr12:29203476-29203494 5'pad=9 3'pad=9 strand=+ repeatMasking=none	2.46946
hg19_snp151Common_rs78465465 range=chr12:29262709-29262727 5'pad=9 3'pad=9 strand=+ repeatMasking=none	0.045214
hg19_snp151Common_rs12305429 range=chr12:29283273-29283291 5'pad=9 3'pad=9 strand=+ repeatMasking=none	-1.02829
hg19_snp151Common_rs11050068 range=chr12:29283523-29283541 5'pad=9 3'pad=9 strand=+ repeatMasking=none	-3.59506
hg19_snp151Common_rs7978770 range=chr12:29567336-29567354 5'pad=9 3'pad=9 strand=+ repeatMasking=none	-3.54094
hg19_snp151Common_rs7301491 range=chr12:29689574-29689592 5'pad=9 3'pad=9 strand=+ repeatMasking=none	0.971889
hg19_snp151Common_rs11050288 range=chr12:29723319-29723337 5'pad=9 3'pad=9 strand=+ repeatMasking=none	-0.720525
hg19_snp151Common_rs114153207 range=chr12:29849575-29849593 5'pad=9 3'pad=9 strand=+ repeatMasking=none	0.187878
hg19_snp151Common_rs118044885 range=chr12:29924707-29924725 5'pad=9 3'pad=9 strand=+ repeatMasking=none	0.700968
hg19_snp151Common_rs12229602 range=chr12:30030700-30030718 5'pad=9 3'pad=9 strand=+ repeatMasking=none	1.59731
hg19_snp151Common_rs73279088 range=chr12:30034481-30034499 5'pad=9 3'pad=9 strand=+ repeatMasking=none	1.92892
hg19_snp151Common_rs12821646 range=chr12:30144191-30144209 5'pad=9 3'pad=9 strand=+ repeatMasking=none	0.662166
hg19_snp151Common_rs147150895 range=chr12:30210350-30210368 5'pad=9 3'pad=9 strand=+ repeatMasking=none	-0.707134
hg19_snp151Common_rs1652143 range=chr12:30418629-30418647 5'pad=9 3'pad=9 strand=- repeatMasking=none	1.24016
hg19_snp151Common_rs4143645 range=chr12:30431543-30431561 5'pad=9 3'pad=9 strand=+ repeatMasking=none	-3.1731
hg19_snp151Common_rs11835199 range=chr12:30449690-30449708 5'pad=9 3'pad=9 strand=+ repeatMasking=none	-0.143611
hg19_snp151Common_rs16906306 range=chr12:30518098-30518116 5'pad=9 3'pad=9 strand=+ repeatMasking=none	0.445677
hg19_snp151Common_rs11832986 range=chr12:30546624-30546642 5'pad=9 3'pad=9 strand=+ repeatMasking=none	0.731168
hg19_snp151Common_rs34256685 range=chr12:30611508-30611526 5'pad=9 3'pad=9 strand=+ repeatMasking=none	-0.778783
hg19_snp151Common_rs59222301 range=chr12:30626020-30626038 5'pad=9 3'pad=9 strand=+ repeatMasking=none	0.057392
hg19_snp151Common_rs11532276 range=chr12:30758565-30758583 5'pad=9 3'pad=9 strand=+ repeatMasking=none	-1.49761
hg19_snp151Common_rs73088047 range=chr12:31102766-31102784 5'pad=9 3'pad=9 strand=+ repeatMasking=none	-2.25633
hg19_snp151Common_rs10771791 range=chr12:31171554-31171572 5'pad=9 3'pad=9 strand=+ repeatMasking=none	-0.306306
hg19_snp151Common_rs10771798 range=chr12:31223313-31223331 5'pad=9 3'pad=9 strand=+ repeatMasking=none	-1.82516
hg19_snp151Common_rs4081649 range=chr12:31242223-31242241 5'pad=9 3'pad=9 strand=+ repeatMasking=none	-1.62211
hg19_snp151Common_rs28460499 range=chr12:31284242-31284260 5'pad=9 3'pad=9 strand=+ repeatMasking=none	2.08293
hg19_snp151Common_rs4931481 range=chr12:31503743-31503761 5'pad=9 3'pad=9 strand=+ repeatMasking=none	-2.48669
hg19_snp151Common_rs144107679 range=chr12:31955679-31955697 5'pad=9 3'pad=9 strand=+ repeatMasking=none	-1.51995
hg19_snp151Common_rs141482833 range=chr12:32179353-32179371 5'pad=9 3'pad=9 strand=+ repeatMasking=none	-3.18897
hg19_snp151Common_rs2668290 range=chr12:32281195-32281213 5'pad=9 3'pad=9 strand=- repeatMasking=none	2.06341
hg19_snp151Common_rs111936901 range=chr12:32342903-32342921 5'pad=9 3'pad=9 strand=+ repeatMasking=none	-1.12576
hg19_snp151Common_rs16919774 range=chr12:32502496-32502514 5'pad=9 3'pad=9 strand=+ repeatMasking=none	1.35641
hg19_snp151Common_rs190853580 range=chr12:32626243-32626261 5'pad=9 3'pad=9 strand=+ repeatMasking=none	-1.85243
hg19_snp151Common_rs74073064 range=chr12:32821170-32821188 5'pad=9 3'pad=9 strand=+ repeatMasking=none	-0.474748
hg19_snp151Common_rs141040674 range=chr12:32935038-32935056 5'pad=9 3'pad=9 strand=+ repeatMasking=none	2.45162
hg19_snp151Common_rs56033839 range=chr12:32970111-32970129 5'pad=9 3'pad=9 strand=+ repeatMasking=none	2.94484
hg19_snp151Common_rs143525894 range=chr12:32994252-32994269 5'pad=9 3'pad=9 strand=+ repeatMasking=none	1.29562
hg19_snp151Common_rs11052297 range=chr12:33063489-33063507 5'pad=9 3'pad=9 strand=+ repeatMasking=none	-0.80835
hg19_snp151Common_rs17622297 range=chr12:33086173-33086191 5'pad=9 3'pad=9 strand=+ repeatMasking=none	-2.38029
hg19_snp151Common_rs61927344 range=chr12:33109008-33109026 5'pad=9 3'pad=9 strand=+ repeatMasking=none	-2.42065
hg19_snp151Common_rs59411863 range=chr12:33280841-33280859 5'pad=9 3'pad=9 strand=+ repeatMasking=none	-1.13028
hg19_snp151Common_rs538680885 range=chr12:33417398-33417416 5'pad=9 3'pad=9 strand=+ repeatMasking=none	1.74024
hg19_snp151Common_rs11052707 range=chr12:33589379-33589397 5'pad=9 3'pad=9 strand=+ repeatMasking=none	0.371529
hg19_snp151Common_rs7296424 range=chr12:33809888-33809906 5'pad=9 3'pad=9 strand=+ repeatMasking=none	-3.54084
hg19_snp151Common_rs58102497 range=chr12:33816124-33816142 5'pad=9 3'pad=9 strand=+ repeatMasking=none	-1.01884
hg19_snp151Common_rs78877795 range=chr12:33922763-33922781 5'pad=9 3'pad=9 strand=+ repeatMasking=none	-1.40639
hg19_snp151Common_rs7979535 range=chr12:33947441-33947459 5'pad=9 3'pad=9 strand=+ repeatMasking=none	2.35382
hg19_snp151Common_rs144475405 range=chr12:33954061-33954079 5'pad=9 3'pad=9 strand=+ repeatMasking=none	-0.687038
hg19_snp151Common_rs116496642 range=chr12:34037073-34037091 5'pad=9 3'pad=9 strand=+ repeatMasking=none	-0.785345
hg19_snp151Common_rs73107038 range=chr12:34143882-34143900 5'pad=9 3'pad=9 strand=+ repeatMasking=none	-1.63255
hg19_snp151Common_rs1844522 range=chr12:34169833-34169851 5'pad=9 3'pad=9 strand=- repeatMasking=none	1.13277
hg19_snp151Common_rs7358760 range=chr12:34207754-34207772 5'pad=9 3'pad=9 strand=+ repeatMasking=none	-0.165672
hg19_snp151Common_rs60199963 range=chr12:34449368-34449386 5'pad=9 3'pad=9 strand=+ repeatMasking=none	-1.2112
hg19_snp151Common_rs138899343 range=chr12:34512069-34512086 5'pad=9 3'pad=9 strand=+ repeatMasking=none	-0.941734
hg19_snp151Common_rs35652542 range=chr12:34828279-34828297 5'pad=9 3'pad=9 strand=+ repeatMasking=none	-0.957712
hg19_snp151Common_rs139958340 range=chr12:37908241-37908259 5'pad=9 3'pad=9 strand=+ repeatMasking=none	-1.09958
hg19_snp151Common_rs36104601 range=chr12:37939601-37939619 5'pad=9 3'pad=9 strand=+ repeatMasking=none	-2.41324
hg19_snp151Common_rs115189038 range=chr12:37981165-37981183 5'pad=9 3'pad=9 strand=+ repeatMasking=none	0.380683
hg19_snp151Common_rs8189520 range=chr12:38033621-38033639 5'pad=9 3'pad=9 strand=+ repeatMasking=none	1.35115
hg19_snp151Common_rs550448004 range=chr12:38057565-38057583 5'pad=9 3'pad=9 strand=+ repeatMasking=none	2.42164
hg19_snp151Common_rs561673537 range=chr12:38096103-38096121 5'pad=9 3'pad=9 strand=+ repeatMasking=none	-1.79668
hg19_snp151Common_rs28874015 range=chr12:38153467-38153485 5'pad=9 3'pad=9 strand=+ repeatMasking=none	3.91563
hg19_snp151Common_rs11532421 range=chr12:38287641-38287659 5'pad=9 3'pad=9 strand=+ repeatMasking=none	0.897738
hg19_snp151Common_rs117424599 range=chr12:38297250-38297268 5'pad=9 3'pad=9 strand=+ repeatMasking=none	-0.715402
hg19_snp151Common_rs11181635 range=chr12:38378411-38378429 5'pad=9 3'pad=9 strand=+ repeatMasking=none	-0.601049
hg19_snp151Common_rs541070680 range=chr12:38378852-38378870 5'pad=9 3'pad=9 strand=+ repeatMasking=none	-0.777704
hg19_snp151Common_rs74422625 range=chr12:38418277-38418295 5'pad=9 3'pad=9 strand=+ repeatMasking=none	-2.26471
hg19_snp151Common_rs56880015 range=chr12:38439160-38439178 5'pad=9 3'pad=9 strand=+ repeatMasking=none	2.96987
hg19_snp151Common_rs371142939 range=chr12:38466918-38466936 5'pad=9 3'pad=9 strand=+ repeatMasking=none	3.04666
hg19_snp151Common_rs116007999 range=chr12:38477626-38477644 5'pad=9 3'pad=9 strand=+ repeatMasking=none	-1.84459
hg19_snp151Common_rs74082057 range=chr12:38479032-38479050 5'pad=9 3'pad=9 strand=+ repeatMasking=none	2.48662
hg19_snp151Common_rs11495407 range=chr12:38488324-38488342 5'pad=9 3'pad=9 strand=+ repeatMasking=none	2.89046
hg19_snp151Common_rs114101962 range=chr12:38640273-38640291 5'pad=9 3'pad=9 strand=+ repeatMasking=none	2.13727
hg19_snp151Common_rs10880978 range=chr12:38761798-38761816 5'pad=9 3'pad=9 strand=+ repeatMasking=none	1.0561
hg19_snp151Common_rs111757450 range=chr12:38805040-38805058 5'pad=9 3'pad=9 strand=+ repeatMasking=none	-1.53618
hg19_snp151Common_rs139184221 range=chr12:38893833-38893851 5'pad=9 3'pad=9 strand=+ repeatMasking=none	-0.653321
hg19_snp151Common_rs115338491 range=chr12:39163045-39163063 5'pad=9 3'pad=9 strand=+ repeatMasking=none	0.63237
hg19_snp151Common_rs113139611 range=chr12:39341403-39341421 5'pad=9 3'pad=9 strand=+ repeatMasking=none	1.72559
hg19_snp151Common_rs74797339 range=chr12:39508043-39508061 5'pad=9 3'pad=9 strand=+ repeatMasking=none	-2.03878
hg19_snp151Common_rs77115887 range=chr12:39723960-39723978 5'pad=9 3'pad=9 strand=+ repeatMasking=none	-0.176431
hg19_snp151Common_rs77485456 range=chr12:39903463-39903481 5'pad=9 3'pad=9 strand=+ repeatMasking=none	-0.049944
hg19_snp151Common_rs4556618 range=chr12:40145697-40145715 5'pad=9 3'pad=9 strand=+ repeatMasking=none	-0.809399
hg19_snp151Common_rs75429034 range=chr12:40191596-40191614 5'pad=9 3'pad=9 strand=+ repeatMasking=none	4.06172
hg19_snp151Common_rs2638240 range=chr12:40576108-40576126 5'pad=9 3'pad=9 strand=- repeatMasking=none	0.90722
hg19_snp151Common_rs115686271 range=chr12:40639034-40639052 5'pad=9 3'pad=9 strand=+ repeatMasking=none	2.69325
hg19_snp151Common_rs17484493 range=chr12:40740864-40740882 5'pad=9 3'pad=9 strand=+ repeatMasking=none	-0.623121
hg19_snp151Common_rs2896981 range=chr12:40781575-40781593 5'pad=9 3'pad=9 strand=+ repeatMasking=none	0.789984
hg19_snp151Common_rs17128229 range=chr12:40846628-40846646 5'pad=9 3'pad=9 strand=+ repeatMasking=none	-0.127219
hg19_snp151Common_rs7137967 range=chr12:41136770-41136788 5'pad=9 3'pad=9 strand=+ repeatMasking=none	-0.242415
hg19_snp151Common_rs7133020 range=chr12:41169862-41169880 5'pad=9 3'pad=9 strand=+ repeatMasking=none	0.520788
hg19_snp151Common_rs10879395 range=chr12:41340443-41340461 5'pad=9 3'pad=9 strand=+ repeatMasking=none	-0.72555
hg19_snp151Common_rs9669430 range=chr12:41479995-41480013 5'pad=9 3'pad=9 strand=+ repeatMasking=none	-0.674197
hg19_snp151Common_rs1431103 range=chr12:41590487-41590505 5'pad=9 3'pad=9 strand=+ repeatMasking=none	-1.67436
hg19_snp151Common_rs1346905 range=chr12:41594167-41594185 5'pad=9 3'pad=9 strand=+ repeatMasking=none	0.366822
hg19_snp151Common_rs7486754 range=chr12:41663187-41663205 5'pad=9 3'pad=9 strand=+ repeatMasking=none	0.634213
hg19_snp151Common_rs117645253 range=chr12:41715552-41715570 5'pad=9 3'pad=9 strand=+ repeatMasking=none	1.71595
hg19_snp151Common_rs35766123 range=chr12:41807013-41807031 5'pad=9 3'pad=9 strand=+ repeatMasking=none	-2.63628
hg19_snp151Common_rs10880091 range=chr12:41916877-41916895 5'pad=9 3'pad=9 strand=+ repeatMasking=none	2.13541
hg19_snp151Common_rs11181039 range=chr12:41992487-41992505 5'pad=9 3'pad=9 strand=+ repeatMasking=none	2.3354
hg19_snp151Common_rs73120242 range=chr12:42026416-42026434 5'pad=9 3'pad=9 strand=+ repeatMasking=none	2.49824
hg19_snp151Common_rs80350470 range=chr12:42219937-42219955 5'pad=9 3'pad=9 strand=+ repeatMasking=none	1.39599
hg19_snp151Common_rs11181258 range=chr12:42331423-42331441 5'pad=9 3'pad=9 strand=+ repeatMasking=none	0.945335
hg19_snp151Common_rs74684108 range=chr12:42471826-42471844 5'pad=9 3'pad=9 strand=+ repeatMasking=none	-1.86058
hg19_snp151Common_rs73131138 range=chr12:42579714-42579732 5'pad=9 3'pad=9 strand=+ repeatMasking=none	0.010109
hg19_snp151Common_rs7972281 range=chr12:43022421-43022439 5'pad=9 3'pad=9 strand=+ repeatMasking=none	1.79411
hg19_snp151Common_rs9804781 range=chr12:43107293-43107311 5'pad=9 3'pad=9 strand=+ repeatMasking=none	0.306828
hg19_snp151Common_rs2678146 range=chr12:43177671-43177689 5'pad=9 3'pad=9 strand=- repeatMasking=none	1.54245
hg19_snp151Common_rs12227246 range=chr12:43223261-43223279 5'pad=9 3'pad=9 strand=+ repeatMasking=none	0.84064
hg19_snp151Common_rs375013614 range=chr12:43396441-43396459 5'pad=9 3'pad=9 strand=+ repeatMasking=none	-0.041192
hg19_snp151Common_rs141380023 range=chr12:44217364-44217382 5'pad=9 3'pad=9 strand=+ repeatMasking=none	-2.52469
hg19_snp151Common_rs113400697 range=chr12:44348748-44348766 5'pad=9 3'pad=9 strand=+ repeatMasking=none	-0.9448
hg19_snp151Common_rs113254957 range=chr12:44372729-44372747 5'pad=9 3'pad=9 strand=+ repeatMasking=none	-0.13805
hg19_snp151Common_rs77838534 range=chr12:44582707-44582725 5'pad=9 3'pad=9 strand=+ repeatMasking=none	-0.296244
hg19_snp151Common_rs111724364 range=chr12:44688360-44688378 5'pad=9 3'pad=9 strand=+ repeatMasking=none	-1.00441
hg19_snp151Common_rs1873980 range=chr12:44802374-44802392 5'pad=9 3'pad=9 strand=- repeatMasking=none	2.71862
hg19_snp151Common_rs59907388 range=chr12:44860631-44860649 5'pad=9 3'pad=9 strand=+ repeatMasking=none	-0.79721
hg19_snp151Common_rs61391734 range=chr12:44950896-44950914 5'pad=9 3'pad=9 strand=+ repeatMasking=none	0.155626
hg19_snp151Common_rs57061175 range=chr12:45183184-45183202 5'pad=9 3'pad=9 strand=+ repeatMasking=none	2.21615
hg19_snp151Common_rs11182708 range=chr12:45228685-45228703 5'pad=9 3'pad=9 strand=+ repeatMasking=none	1.26414
hg19_snp151Common_rs375660 range=chr12:45337338-45337356 5'pad=9 3'pad=9 strand=+ repeatMasking=none	-1.20934
hg19_snp151Common_rs77876702 range=chr12:45495163-45495181 5'pad=9 3'pad=9 strand=+ repeatMasking=none	0.019495
hg19_snp151Common_rs10785548 range=chr12:45511011-45511029 5'pad=9 3'pad=9 strand=+ repeatMasking=none	1.32876
hg19_snp151Common_rs12306299 range=chr12:45554285-45554303 5'pad=9 3'pad=9 strand=+ repeatMasking=none	-1.4526
hg19_snp151Common_rs149909526 range=chr12:45842479-45842497 5'pad=9 3'pad=9 strand=+ repeatMasking=none	-0.140292
hg19_snp151Common_rs10880864 range=chr12:46261292-46261310 5'pad=9 3'pad=9 strand=+ repeatMasking=none	0.935899
hg19_snp151Common_rs7315213 range=chr12:46482716-46482734 5'pad=9 3'pad=9 strand=+ repeatMasking=none	2.40214
hg19_snp151Common_rs116845314 range=chr12:46490709-46490727 5'pad=9 3'pad=9 strand=+ repeatMasking=none	-3.80911
hg19_snp151Common_rs1045278 range=chr12:46582531-46582549 5'pad=9 3'pad=9 strand=- repeatMasking=none	0.557838
hg19_snp151Common_rs2471588 range=chr12:46926179-46926197 5'pad=9 3'pad=9 strand=- repeatMasking=none	0.423182
hg19_snp151Common_rs2257215 range=chr12:46942985-46943003 5'pad=9 3'pad=9 strand=+ repeatMasking=none	-2.46407
hg19_snp151Common_rs4533116 range=chr12:47226552-47226570 5'pad=9 3'pad=9 strand=+ repeatMasking=none	-0.992541
hg19_snp151Common_rs2715778 range=chr12:47239023-47239041 5'pad=9 3'pad=9 strand=+ repeatMasking=none	1.09114
hg19_snp151Common_rs61927723 range=chr12:47597974-47597992 5'pad=9 3'pad=9 strand=+ repeatMasking=none	1.99574
hg19_snp151Common_rs1101809 range=chr12:47648659-47648677 5'pad=9 3'pad=9 strand=+ repeatMasking=none	-0.828668
hg19_snp151Common_rs2905498 range=chr12:47848649-47848667 5'pad=9 3'pad=9 strand=+ repeatMasking=none	-1.1016
hg19_snp151Common_rs61918089 range=chr12:47923387-47923405 5'pad=9 3'pad=9 strand=+ repeatMasking=none	3.22058
hg19_snp151Common_rs11307316 range=chr12:47963506-47963524 5'pad=9 3'pad=9 strand=+ repeatMasking=none	-0.93268
hg19_snp151Common_rs76798446 range=chr12:48090576-48090594 5'pad=9 3'pad=9 strand=+ repeatMasking=none	2.32498
hg19_snp151Common_rs929269 range=chr12:48114752-48114770 5'pad=9 3'pad=9 strand=- repeatMasking=none	-3.75662
hg19_snp151Common_rs61917655 range=chr12:48210778-48210796 5'pad=9 3'pad=9 strand=+ repeatMasking=none	-0.624139
hg19_snp151Common_rs1544410 range=chr12:48239826-48239844 5'pad=9 3'pad=9 strand=- repeatMasking=none	0.353076
hg19_snp151Common_rs2238135 range=chr12:48278181-48278199 5'pad=9 3'pad=9 strand=- repeatMasking=none	-0.398316
hg19_snp151Common_rs10875722 range=chr12:48413625-48413643 5'pad=9 3'pad=9 strand=+ repeatMasking=none	-1.77521
hg19_snp151Common_rs61750873 range=chr12:48478993-48479011 5'pad=9 3'pad=9 strand=+ repeatMasking=none	-1.73351
hg19_snp151Common_rs118112324 range=chr12:48493069-48493087 5'pad=9 3'pad=9 strand=+ repeatMasking=none	-0.336879
hg19_snp151Common_rs77844502 range=chr12:48638332-48638350 5'pad=9 3'pad=9 strand=+ repeatMasking=none	2.55542
hg19_snp151Common_rs2956710 range=chr12:48644801-48644819 5'pad=9 3'pad=9 strand=- repeatMasking=none	-4.06338
hg19_snp151Common_rs17825013 range=chr12:48702816-48702834 5'pad=9 3'pad=9 strand=+ repeatMasking=none	1.59079
hg19_snp151Common_rs11541302 range=chr12:48765029-48765047 5'pad=9 3'pad=9 strand=+ repeatMasking=none	1.79277
hg19_snp151Common_rs61942820 range=chr12:48824123-48824141 5'pad=9 3'pad=9 strand=+ repeatMasking=none	1.65019
hg19_snp151Common_rs79263537 range=chr12:49314908-49314926 5'pad=9 3'pad=9 strand=+ repeatMasking=none	-0.556334
hg19_snp151Common_rs112748719 range=chr12:49857484-49857502 5'pad=9 3'pad=9 strand=+ repeatMasking=none	0.388446
hg19_snp151Common_rs2358539 range=chr12:50619609-50619627 5'pad=9 3'pad=9 strand=+ repeatMasking=none	3.91299
hg19_snp151Common_rs11169368 range=chr12:50699031-50699049 5'pad=9 3'pad=9 strand=+ repeatMasking=none	1.68387
hg19_snp151Common_rs118171382 range=chr12:50931214-50931232 5'pad=9 3'pad=9 strand=+ repeatMasking=none	-0.410421
hg19_snp151Common_rs140363871 range=chr12:51266390-51266408 5'pad=9 3'pad=9 strand=+ repeatMasking=none	-1.78605
hg19_snp151Common_rs2730647 range=chr12:51554817-51554835 5'pad=9 3'pad=9 strand=+ repeatMasking=none	-1.61959
hg19_snp151Common_rs112648976 range=chr12:51555246-51555264 5'pad=9 3'pad=9 strand=+ repeatMasking=none	-0.610666
hg19_snp151Common_rs11441886 range=chr12:51646611-51646628 5'pad=9 3'pad=9 strand=+ repeatMasking=none	-0.744192
hg19_snp151Common_rs6580848 range=chr12:52263893-52263911 5'pad=9 3'pad=9 strand=+ repeatMasking=none	2.33483
hg19_snp151Common_rs873438 range=chr12:52267141-52267159 5'pad=9 3'pad=9 strand=- repeatMasking=none	0.248246
hg19_snp151Common_rs2859593 range=chr12:52326947-52326965 5'pad=9 3'pad=9 strand=- repeatMasking=none	0.024987
hg19_snp151Common_rs148266858 range=chr12:52373071-52373089 5'pad=9 3'pad=9 strand=+ repeatMasking=none	2.34515
hg19_snp151Common_rs111450533 range=chr12:52410716-52410734 5'pad=9 3'pad=9 strand=+ repeatMasking=none	2.09074
hg19_snp151Common_rs150221111 range=chr12:52505538-52505556 5'pad=9 3'pad=9 strand=+ repeatMasking=none	-0.042923
hg19_snp151Common_rs149098810 range=chr12:52509621-52509639 5'pad=9 3'pad=9 strand=+ repeatMasking=none	2.09676
hg19_snp151Common_rs10219512 range=chr12:52537632-52537650 5'pad=9 3'pad=9 strand=+ repeatMasking=none	-1.47342
hg19_snp151Common_rs78487129 range=chr12:52572892-52572910 5'pad=9 3'pad=9 strand=+ repeatMasking=none	-0.082695
hg19_snp151Common_rs2286996 range=chr12:52647794-52647812 5'pad=9 3'pad=9 strand=- repeatMasking=none	-3.75295
hg19_snp151Common_rs2293638 range=chr12:52820235-52820253 5'pad=9 3'pad=9 strand=- repeatMasking=none	-2.92212
hg19_snp151Common_rs2232380 range=chr12:52828297-52828315 5'pad=9 3'pad=9 strand=- repeatMasking=none	-0.17713
hg19_snp151Common_rs10876370 range=chr12:53248075-53248093 5'pad=9 3'pad=9 strand=+ repeatMasking=none	1.0515
hg19_snp151Common_rs2682306 range=chr12:53270398-53270416 5'pad=9 3'pad=9 strand=- repeatMasking=none	1.84547
hg19_snp151Common_rs116661089 range=chr12:53367579-53367597 5'pad=9 3'pad=9 strand=+ repeatMasking=none	0.017349
hg19_snp151Common_rs17123172 range=chr12:53494379-53494397 5'pad=9 3'pad=9 strand=+ repeatMasking=none	0.242782
hg19_snp151Common_rs139314301 range=chr12:53506055-53506073 5'pad=9 3'pad=9 strand=+ repeatMasking=none	-1.98528
hg19_snp151Common_rs151308533 range=chr12:53760258-53760276 5'pad=9 3'pad=9 strand=+ repeatMasking=none	1.02547
hg19_snp151Common_rs11834879 range=chr12:54555150-54555168 5'pad=9 3'pad=9 strand=+ repeatMasking=none	1.95518
hg19_snp151Common_rs116463597 range=chr12:54652429-54652447 5'pad=9 3'pad=9 strand=+ repeatMasking=none	-1.17077
hg19_snp151Common_rs3840781 range=chr12:54758354-54758372 5'pad=9 3'pad=9 strand=- repeatMasking=none	-1.21256
hg19_snp151Common_rs12296181 range=chr12:54794232-54794250 5'pad=9 3'pad=9 strand=+ repeatMasking=none	0.538781
hg19_snp151Common_rs61923480 range=chr12:54884193-54884211 5'pad=9 3'pad=9 strand=+ repeatMasking=none	-0.496391
hg19_snp151Common_rs1249950 range=chr12:54970445-54970463 5'pad=9 3'pad=9 strand=+ repeatMasking=none	1.40944
hg19_snp151Common_rs57280187 range=chr12:55125143-55125161 5'pad=9 3'pad=9 strand=+ repeatMasking=none	-0.918191
hg19_snp151Common_rs2633413 range=chr12:55432117-55432135 5'pad=9 3'pad=9 strand=- repeatMasking=none	-0.494506
hg19_snp151Common_rs11171286 range=chr12:55513306-55513324 5'pad=9 3'pad=9 strand=+ repeatMasking=none	2.94209
hg19_snp151Common_rs10876715 range=chr12:55532159-55532177 5'pad=9 3'pad=9 strand=+ repeatMasking=none	-2.74726
hg19_snp151Common_rs144430839 range=chr12:55550387-55550405 5'pad=9 3'pad=9 strand=+ repeatMasking=none	1.31977
hg19_snp151Common_rs7960409 range=chr12:55898503-55898521 5'pad=9 3'pad=9 strand=+ repeatMasking=none	-0.889882
hg19_snp151Common_rs11835716 range=chr12:55945249-55945267 5'pad=9 3'pad=9 strand=+ repeatMasking=none	0.255056
hg19_snp151Common_rs117270945 range=chr12:55982277-55982295 5'pad=9 3'pad=9 strand=+ repeatMasking=none	0.024915
hg19_snp151Common_rs79135614 range=chr12:56071308-56071326 5'pad=9 3'pad=9 strand=+ repeatMasking=none	0.381583
hg19_snp151Common_rs12320309 range=chr12:56273564-56273582 5'pad=9 3'pad=9 strand=+ repeatMasking=none	-0.206074
hg19_snp151Common_rs7309340 range=chr12:56454562-56454580 5'pad=9 3'pad=9 strand=+ repeatMasking=none	-2.42687
hg19_snp151Common_rs1274494 range=chr12:56618089-56618107 5'pad=9 3'pad=9 strand=- repeatMasking=none	-0.417861
hg19_snp151Common_rs17118431 range=chr12:56667091-56667109 5'pad=9 3'pad=9 strand=+ repeatMasking=none	1.52569
hg19_snp151Common_rs11575229 range=chr12:56750728-56750746 5'pad=9 3'pad=9 strand=- repeatMasking=none	-1.09641
hg19_snp151Common_rs1903370 range=chr12:57206675-57206693 5'pad=9 3'pad=9 strand=- repeatMasking=none	0.823451
hg19_snp151Common_rs80121216 range=chr12:57253289-57253307 5'pad=9 3'pad=9 strand=+ repeatMasking=none	-0.309448
hg19_snp151Common_rs2888107 range=chr12:57301385-57301403 5'pad=9 3'pad=9 strand=- repeatMasking=none	1.90238
hg19_snp151Common_rs12814239 range=chr12:57569469-57569487 5'pad=9 3'pad=9 strand=+ repeatMasking=none	0.273169
hg19_snp151Common_rs377330434 range=chr12:57853945-57853963 5'pad=9 3'pad=9 strand=+ repeatMasking=none	0.743275
hg19_snp151Common_rs4760255 range=chr12:57855171-57855189 5'pad=9 3'pad=9 strand=+ repeatMasking=none	1.09456
hg19_snp151Common_rs541869 range=chr12:57878112-57878130 5'pad=9 3'pad=9 strand=+ repeatMasking=none	0.968884
hg19_snp151Common_rs7973639 range=chr12:57985420-57985438 5'pad=9 3'pad=9 strand=+ repeatMasking=none	-3.0711
hg19_snp151Common_rs117839344 range=chr12:58183627-58183645 5'pad=9 3'pad=9 strand=+ repeatMasking=none	-2.85896
hg19_snp151Common_rs368571344 range=chr12:58240326-58240344 5'pad=9 3'pad=9 strand=+ repeatMasking=none	-3.20998
hg19_snp151Common_rs3933982 range=chr12:58382088-58382106 5'pad=9 3'pad=9 strand=- repeatMasking=none	0.951138
hg19_snp151Common_rs73337720 range=chr12:58406070-58406088 5'pad=9 3'pad=9 strand=+ repeatMasking=none	-1.83559
hg19_snp151Common_rs55889877 range=chr12:58882803-58882821 5'pad=9 3'pad=9 strand=+ repeatMasking=none	-0.474748
hg19_snp151Common_rs4760231 range=chr12:58934593-58934611 5'pad=9 3'pad=9 strand=+ repeatMasking=none	-0.490324
hg19_snp151Common_rs12813656 range=chr12:58940643-58940661 5'pad=9 3'pad=9 strand=+ repeatMasking=none	0.014407
hg19_snp151Common_rs1378821 range=chr12:59082258-59082276 5'pad=9 3'pad=9 strand=- repeatMasking=none	-2.55506
hg19_snp151Common_rs17121387 range=chr12:59138627-59138645 5'pad=9 3'pad=9 strand=+ repeatMasking=none	-1.42731
hg19_snp151Common_rs78636501 range=chr12:59229650-59229668 5'pad=9 3'pad=9 strand=+ repeatMasking=none	2.70729
hg19_snp151Common_rs148228830 range=chr12:59246179-59246197 5'pad=9 3'pad=9 strand=+ repeatMasking=none	-1.32003
hg19_snp151Common_rs78361319 range=chr12:59254180-59254198 5'pad=9 3'pad=9 strand=+ repeatMasking=none	-0.82683
hg19_snp151Common_rs146632796 range=chr12:59330183-59330200 5'pad=9 3'pad=9 strand=+ repeatMasking=none	1.08172
hg19_snp151Common_rs78489497 range=chr12:59379889-59379907 5'pad=9 3'pad=9 strand=+ repeatMasking=none	1.21368
hg19_snp151Common_rs11172880 range=chr12:59428658-59428676 5'pad=9 3'pad=9 strand=+ repeatMasking=none	3.47251
hg19_snp151Common_rs112786335 range=chr12:59499685-59499703 5'pad=9 3'pad=9 strand=+ repeatMasking=none	2.5197
hg19_snp151Common_rs75955779 range=chr12:59762619-59762637 5'pad=9 3'pad=9 strand=+ repeatMasking=none	0.441874
hg19_snp151Common_rs116119946 range=chr12:59942162-59942180 5'pad=9 3'pad=9 strand=+ repeatMasking=none	-0.487045
hg19_snp151Common_rs55869967 range=chr12:60171665-60171683 5'pad=9 3'pad=9 strand=+ repeatMasking=none	-1.18947
hg19_snp151Common_rs4439553 range=chr12:60199756-60199774 5'pad=9 3'pad=9 strand=+ repeatMasking=none	0.86908
hg19_snp151Common_rs12321091 range=chr12:60535220-60535238 5'pad=9 3'pad=9 strand=+ repeatMasking=none	-3.65056
hg19_snp151Common_rs2134886 range=chr12:60785059-60785077 5'pad=9 3'pad=9 strand=+ repeatMasking=none	-2.93874
hg19_snp151Common_rs544627563 range=chr12:60931998-60932015 5'pad=9 3'pad=9 strand=+ repeatMasking=none	-0.585733
hg19_snp151Common_rs80209850 range=chr12:61113689-61113707 5'pad=9 3'pad=9 strand=+ repeatMasking=none	-1.53534
hg19_snp151Common_rs114651986 range=chr12:61214025-61214043 5'pad=9 3'pad=9 strand=+ repeatMasking=none	0.258073
hg19_snp151Common_rs7306016 range=chr12:61417643-61417661 5'pad=9 3'pad=9 strand=+ repeatMasking=none	-0.305494
hg19_snp151Common_rs10747908 range=chr12:61486603-61486621 5'pad=9 3'pad=9 strand=+ repeatMasking=none	-0.686706
hg19_snp151Common_rs2731403 range=chr12:61708422-61708440 5'pad=9 3'pad=9 strand=+ repeatMasking=none	0.510606
hg19_snp151Common_rs12371435 range=chr12:61787849-61787867 5'pad=9 3'pad=9 strand=+ repeatMasking=none	-0.357129
hg19_snp151Common_rs4283055 range=chr12:61796649-61796667 5'pad=9 3'pad=9 strand=+ repeatMasking=none	-0.870273
hg19_snp151Common_rs1869401 range=chr12:62013694-62013712 5'pad=9 3'pad=9 strand=+ repeatMasking=none	0.13554
hg19_snp151Common_rs1506847 range=chr12:62081161-62081179 5'pad=9 3'pad=9 strand=+ repeatMasking=none	-1.89986
hg19_snp151Common_rs115627145 range=chr12:62140621-62140639 5'pad=9 3'pad=9 strand=+ repeatMasking=none	0.155825
hg19_snp151Common_rs7965138 range=chr12:62301552-62301570 5'pad=9 3'pad=9 strand=+ repeatMasking=none	3.1222
hg19_snp151Common_rs66467365 range=chr12:62498049-62498067 5'pad=9 3'pad=9 strand=- repeatMasking=none	-0.424398
hg19_snp151Common_rs34320621 range=chr12:62526892-62526910 5'pad=9 3'pad=9 strand=+ repeatMasking=none	-1.06654
hg19_snp151Common_rs115441909 range=chr12:62553417-62553435 5'pad=9 3'pad=9 strand=+ repeatMasking=none	0.444414
hg19_snp151Common_rs17717265 range=chr12:62765568-62765586 5'pad=9 3'pad=9 strand=+ repeatMasking=none	-0.900858
hg19_snp151Common_rs342165 range=chr12:63081260-63081278 5'pad=9 3'pad=9 strand=+ repeatMasking=none	-0.96909
hg19_snp151Common_rs1146112 range=chr12:63703119-63703137 5'pad=9 3'pad=9 strand=- repeatMasking=none	0.188479
hg19_snp151Common_rs489614 range=chr12:63819320-63819338 5'pad=9 3'pad=9 strand=- repeatMasking=none	0.0673
hg19_snp151Common_rs58579188 range=chr12:63983907-63983925 5'pad=9 3'pad=9 strand=+ repeatMasking=none	2.4997
hg19_snp151Common_rs12317994 range=chr12:64137142-64137160 5'pad=9 3'pad=9 strand=+ repeatMasking=none	0.055957
hg19_snp151Common_rs4762999 range=chr12:64197771-64197789 5'pad=9 3'pad=9 strand=+ repeatMasking=none	-0.669833
hg19_snp151Common_rs73313436 range=chr12:64215187-64215205 5'pad=9 3'pad=9 strand=+ repeatMasking=none	-1.34353
hg19_snp151Common_rs11614289 range=chr12:64231667-64231685 5'pad=9 3'pad=9 strand=+ repeatMasking=none	-2.01112
hg19_snp151Common_rs4553444 range=chr12:64433436-64433454 5'pad=9 3'pad=9 strand=+ repeatMasking=none	0.229892
hg19_snp151Common_rs789738 range=chr12:64536000-64536018 5'pad=9 3'pad=9 strand=- repeatMasking=none	-0.38028
hg19_snp151Common_rs12581905 range=chr12:64678407-64678425 5'pad=9 3'pad=9 strand=+ repeatMasking=none	1.56016
hg19_snp151Common_rs142617537 range=chr12:64761516-64761534 5'pad=9 3'pad=9 strand=+ repeatMasking=none	0.552766
hg19_snp151Common_rs75365483 range=chr12:64822746-64822764 5'pad=9 3'pad=9 strand=+ repeatMasking=none	-0.787517
hg19_snp151Common_rs115304675 range=chr12:64933321-64933339 5'pad=9 3'pad=9 strand=+ repeatMasking=none	-1.93823
hg19_snp151Common_rs76569522 range=chr12:65010490-65010508 5'pad=9 3'pad=9 strand=+ repeatMasking=none	0.072572
hg19_snp151Common_rs1147091 range=chr12:65152157-65152175 5'pad=9 3'pad=9 strand=+ repeatMasking=none	-0.157855
hg19_snp151Common_rs11175555 range=chr12:65189012-65189030 5'pad=9 3'pad=9 strand=+ repeatMasking=none	-3.17908
hg19_snp151Common_rs114268097 range=chr12:65200965-65200983 5'pad=9 3'pad=9 strand=+ repeatMasking=none	-1.91781
hg19_snp151Common_rs144790595 range=chr12:65470096-65470114 5'pad=9 3'pad=9 strand=+ repeatMasking=none	0.657402
hg19_snp151Common_rs1344946 range=chr12:65764163-65764181 5'pad=9 3'pad=9 strand=- repeatMasking=none	-2.75134
hg19_snp151Common_rs78229380 range=chr12:65893838-65893856 5'pad=9 3'pad=9 strand=+ repeatMasking=none	0.223546
hg19_snp151Common_rs4129217 range=chr12:65958498-65958516 5'pad=9 3'pad=9 strand=+ repeatMasking=none	-0.221798
hg19_snp151Common_rs117772557 range=chr12:66074264-66074282 5'pad=9 3'pad=9 strand=+ repeatMasking=none	0.891636
hg19_snp151Common_rs1168746 range=chr12:66556760-66556778 5'pad=9 3'pad=9 strand=- repeatMasking=none	-0.344377
hg19_snp151Common_rs12227179 range=chr12:66700264-66700282 5'pad=9 3'pad=9 strand=+ repeatMasking=none	-2.07922
hg19_snp151Common_rs11176212 range=chr12:66870508-66870526 5'pad=9 3'pad=9 strand=+ repeatMasking=none	0.521088
hg19_snp151Common_rs58850953 range=chr12:66935803-66935821 5'pad=9 3'pad=9 strand=+ repeatMasking=none	1.0926
hg19_snp151Common_rs192647813 range=chr12:67198207-67198225 5'pad=9 3'pad=9 strand=+ repeatMasking=none	-2.20624
hg19_snp151Common_rs143860251 range=chr12:67268252-67268270 5'pad=9 3'pad=9 strand=+ repeatMasking=none	0.308745
hg19_snp151Common_rs12810857 range=chr12:67326629-67326647 5'pad=9 3'pad=9 strand=+ repeatMasking=none	1.31315
hg19_snp151Common_rs537292136 range=chr12:67340557-67340575 5'pad=9 3'pad=9 strand=+ repeatMasking=none	-0.72768
hg19_snp151Common_rs10784610 range=chr12:67516453-67516471 5'pad=9 3'pad=9 strand=+ repeatMasking=none	-1.07821
hg19_snp151Common_rs9788138 range=chr12:67632500-67632518 5'pad=9 3'pad=9 strand=+ repeatMasking=none	-0.114305
hg19_snp151Common_rs59433028 range=chr12:67823831-67823849 5'pad=9 3'pad=9 strand=+ repeatMasking=none	0.573781
hg19_snp151Common_rs4630366 range=chr12:67963540-67963558 5'pad=9 3'pad=9 strand=+ repeatMasking=none	-0.615791
hg19_snp151Common_rs4913357 range=chr12:68090548-68090566 5'pad=9 3'pad=9 strand=+ repeatMasking=none	2.28362
hg19_snp151Common_rs9652024 range=chr12:68112896-68112914 5'pad=9 3'pad=9 strand=+ repeatMasking=none	-1.11689
hg19_snp151Common_rs10784645 range=chr12:68115280-68115298 5'pad=9 3'pad=9 strand=+ repeatMasking=none	-0.673665
hg19_snp151Common_rs11176864 range=chr12:68167551-68167569 5'pad=9 3'pad=9 strand=+ repeatMasking=none	-1.23593
hg19_snp151Common_rs2190735 range=chr12:68369259-68369277 5'pad=9 3'pad=9 strand=+ repeatMasking=none	-0.540777
hg19_snp151Common_rs113673096 range=chr12:68702603-68702621 5'pad=9 3'pad=9 strand=+ repeatMasking=none	1.17879
hg19_snp151Common_rs73322521 range=chr12:68774235-68774253 5'pad=9 3'pad=9 strand=+ repeatMasking=none	1.57439
hg19_snp151Common_rs630244 range=chr12:68786773-68786791 5'pad=9 3'pad=9 strand=- repeatMasking=none	0.35291
hg19_snp151Common_rs10878839 range=chr12:68879920-68879938 5'pad=9 3'pad=9 strand=+ repeatMasking=none	-1.62368
hg19_snp151Common_rs7965270 range=chr12:68991962-68991980 5'pad=9 3'pad=9 strand=+ repeatMasking=none	5.04463
hg19_snp151Common_rs141682684 range=chr12:69104824-69104842 5'pad=9 3'pad=9 strand=+ repeatMasking=none	-0.311253
hg19_snp151Common_rs73327646 range=chr12:69410200-69410218 5'pad=9 3'pad=9 strand=+ repeatMasking=none	1.5202
hg19_snp151Common_rs61928703 range=chr12:69503367-69503385 5'pad=9 3'pad=9 strand=+ repeatMasking=none	2.22739
hg19_snp151Common_rs117033278 range=chr12:69529538-69529556 5'pad=9 3'pad=9 strand=+ repeatMasking=none	-2.08801
hg19_snp151Common_rs78615550 range=chr12:69778369-69778387 5'pad=9 3'pad=9 strand=+ repeatMasking=none	-2.01349
hg19_snp151Common_rs149250726 range=chr12:69880078-69880095 5'pad=9 3'pad=9 strand=+ repeatMasking=none	2.33239
hg19_snp151Common_rs2588440 range=chr12:69971465-69971483 5'pad=9 3'pad=9 strand=+ repeatMasking=none	-2.91317
hg19_snp151Common_rs12424754 range=chr12:70196529-70196547 5'pad=9 3'pad=9 strand=+ repeatMasking=none	-2.53586
hg19_snp151Common_rs61930195 range=chr12:70226271-70226289 5'pad=9 3'pad=9 strand=+ repeatMasking=none	0.686016
hg19_snp151Common_rs6581910 range=chr12:70345619-70345637 5'pad=9 3'pad=9 strand=+ repeatMasking=none	-2.42028
hg19_snp151Common_rs60836512 range=chr12:70387295-70387313 5'pad=9 3'pad=9 strand=+ repeatMasking=none	0.396986
hg19_snp151Common_rs710690 range=chr12:70449953-70449971 5'pad=9 3'pad=9 strand=+ repeatMasking=none	0.640274
hg19_snp151Common_rs76353021 range=chr12:70654173-70654191 5'pad=9 3'pad=9 strand=+ repeatMasking=none	-1.75129
hg19_snp151Common_rs4761135 range=chr12:70692180-70692198 5'pad=9 3'pad=9 strand=+ repeatMasking=none	-0.94855
hg19_snp151Common_rs12821702 range=chr12:70907761-70907779 5'pad=9 3'pad=9 strand=+ repeatMasking=none	1.70278
hg19_snp151Common_rs79822877 range=chr12:71020961-71020979 5'pad=9 3'pad=9 strand=+ repeatMasking=none	0.831642
hg19_snp151Common_rs118172494 range=chr12:71035337-71035355 5'pad=9 3'pad=9 strand=+ repeatMasking=none	2.16363
hg19_snp151Common_rs143984874 range=chr12:71047715-71047733 5'pad=9 3'pad=9 strand=+ repeatMasking=none	3.61379
hg19_snp151Common_rs59514806 range=chr12:71063272-71063290 5'pad=9 3'pad=9 strand=+ repeatMasking=none	-1.2301
hg19_snp151Common_rs75681739 range=chr12:71074460-71074478 5'pad=9 3'pad=9 strand=+ repeatMasking=none	2.77472
hg19_snp151Common_rs147239858 range=chr12:71140681-71140699 5'pad=9 3'pad=9 strand=+ repeatMasking=none	0.273019
hg19_snp151Common_rs77868094 range=chr12:71277570-71277588 5'pad=9 3'pad=9 strand=+ repeatMasking=none	1.2483
hg19_snp151Common_rs1512993 range=chr12:71401010-71401028 5'pad=9 3'pad=9 strand=+ repeatMasking=none	-2.42162
hg19_snp151Common_rs1913196 range=chr12:71418338-71418356 5'pad=9 3'pad=9 strand=+ repeatMasking=none	-1.12354
hg19_snp151Common_rs115022302 range=chr12:71598716-71598734 5'pad=9 3'pad=9 strand=+ repeatMasking=none	2.76176
hg19_snp151Common_rs6582078 range=chr12:72374882-72374900 5'pad=9 3'pad=9 strand=+ repeatMasking=none	-0.493769
hg19_snp151Common_rs114736790 range=chr12:72438999-72439017 5'pad=9 3'pad=9 strand=+ repeatMasking=none	2.28314
hg19_snp151Common_rs3935113 range=chr12:72721824-72721842 5'pad=9 3'pad=9 strand=+ repeatMasking=none	1.00365
hg19_snp151Common_rs71071856 range=chr12:73215150-73215167 5'pad=9 3'pad=9 strand=+ repeatMasking=none	2.13815
hg19_snp151Common_rs71950235 range=chr12:73285691-73285709 5'pad=9 3'pad=9 strand=+ repeatMasking=none	-0.414822
hg19_snp151Common_rs66813616 range=chr12:73628535-73628553 5'pad=9 3'pad=9 strand=+ repeatMasking=none	2.14495
hg19_snp151Common_rs138530940 range=chr12:73663833-73663851 5'pad=9 3'pad=9 strand=+ repeatMasking=none	1.71236
hg19_snp151Common_rs142848438 range=chr12:73703831-73703849 5'pad=9 3'pad=9 strand=+ repeatMasking=none	-2.44077
hg19_snp151Common_rs7311813 range=chr12:73714537-73714555 5'pad=9 3'pad=9 strand=+ repeatMasking=none	-0.809726
hg19_snp151Common_rs7965850 range=chr12:73787416-73787434 5'pad=9 3'pad=9 strand=+ repeatMasking=none	0.648454
hg19_snp151Common_rs73177752 range=chr12:74034314-74034332 5'pad=9 3'pad=9 strand=+ repeatMasking=none	3.51986
hg19_snp151Common_rs141106574 range=chr12:74064122-74064139 5'pad=9 3'pad=9 strand=+ repeatMasking=none	0.003966
hg19_snp151Common_rs7966438 range=chr12:74472377-74472395 5'pad=9 3'pad=9 strand=+ repeatMasking=none	2.72214
hg19_snp151Common_rs78981345 range=chr12:74529412-74529430 5'pad=9 3'pad=9 strand=+ repeatMasking=none	2.50763
hg19_snp151Common_rs78736553 range=chr12:74574211-74574229 5'pad=9 3'pad=9 strand=+ repeatMasking=none	0.562293
hg19_snp151Common_rs6582215 range=chr12:74730605-74730623 5'pad=9 3'pad=9 strand=+ repeatMasking=none	-0.700884
hg19_snp151Common_rs117852288 range=chr12:74831689-74831707 5'pad=9 3'pad=9 strand=+ repeatMasking=none	0.961092
hg19_snp151Common_rs5799176 range=chr12:74999016-74999034 5'pad=9 3'pad=9 strand=+ repeatMasking=none	0.994649
hg19_snp151Common_rs78900509 range=chr12:75349322-75349340 5'pad=9 3'pad=9 strand=+ repeatMasking=none	0.761941
hg19_snp151Common_rs75826325 range=chr12:75583885-75583903 5'pad=9 3'pad=9 strand=+ repeatMasking=none	0.170678
hg19_snp151Common_rs1679376 range=chr12:75898464-75898482 5'pad=9 3'pad=9 strand=+ repeatMasking=none	0.485211
hg19_snp151Common_rs114579250 range=chr12:75901547-75901565 5'pad=9 3'pad=9 strand=+ repeatMasking=none	1.49514
hg19_snp151Common_rs5799235 range=chr12:76032627-76032644 5'pad=9 3'pad=9 strand=+ repeatMasking=none	-0.169899
hg19_snp151Common_rs4831946 range=chr12:76168377-76168395 5'pad=9 3'pad=9 strand=- repeatMasking=none	0.959689
hg19_snp151Common_rs73141586 range=chr12:76222277-76222295 5'pad=9 3'pad=9 strand=+ repeatMasking=none	0.910059
hg19_snp151Common_rs12819031 range=chr12:76237727-76237745 5'pad=9 3'pad=9 strand=+ repeatMasking=none	4.11615
hg19_snp151Common_rs1517739 range=chr12:76546471-76546489 5'pad=9 3'pad=9 strand=+ repeatMasking=none	2.45414
hg19_snp151Common_rs2669010 range=chr12:77009051-77009069 5'pad=9 3'pad=9 strand=+ repeatMasking=none	-1.29118
hg19_snp151Common_rs147163032 range=chr12:77039135-77039153 5'pad=9 3'pad=9 strand=+ repeatMasking=none	-1.56832
hg19_snp151Common_rs145276137 range=chr12:77213669-77213687 5'pad=9 3'pad=9 strand=+ repeatMasking=none	-0.926089
hg19_snp151Common_rs76982341 range=chr12:77332840-77332858 5'pad=9 3'pad=9 strand=+ repeatMasking=none	-2.29648
hg19_snp151Common_rs310855 range=chr12:77461190-77461208 5'pad=9 3'pad=9 strand=+ repeatMasking=none	1.98716
hg19_snp151Common_rs1081584 range=chr12:77560075-77560093 5'pad=9 3'pad=9 strand=- repeatMasking=none	1.86789
hg19_snp151Common_rs17043244 range=chr12:77668598-77668616 5'pad=9 3'pad=9 strand=+ repeatMasking=none	0.098833
hg19_snp151Common_rs74107742 range=chr12:77880581-77880599 5'pad=9 3'pad=9 strand=+ repeatMasking=none	-4.05244
hg19_snp151Common_rs7968009 range=chr12:78178643-78178661 5'pad=9 3'pad=9 strand=+ repeatMasking=none	-1.3653
hg19_snp151Common_rs79216281 range=chr12:78250751-78250769 5'pad=9 3'pad=9 strand=+ repeatMasking=none	3.19245
hg19_snp151Common_rs2086229 range=chr12:78382994-78383012 5'pad=9 3'pad=9 strand=- repeatMasking=none	2.47562
hg19_snp151Common_rs11305296 range=chr12:78998807-78998825 5'pad=9 3'pad=9 strand=+ repeatMasking=none	1.36094
hg19_snp151Common_rs201128523 range=chr12:79046555-79046573 5'pad=9 3'pad=9 strand=+ repeatMasking=none	-1.99531
hg19_snp151Common_rs146112032 range=chr12:79283888-79283905 5'pad=9 3'pad=9 strand=+ repeatMasking=none	0.313696
hg19_snp151Common_rs1526971 range=chr12:79588501-79588519 5'pad=9 3'pad=9 strand=+ repeatMasking=none	1.89915
hg19_snp151Common_rs1245778 range=chr12:79768162-79768180 5'pad=9 3'pad=9 strand=+ repeatMasking=none	-2.47403
hg19_snp151Common_rs11114027 range=chr12:79775239-79775257 5'pad=9 3'pad=9 strand=+ repeatMasking=none	1.86083
hg19_snp151Common_rs12423164 range=chr12:79808550-79808568 5'pad=9 3'pad=9 strand=+ repeatMasking=none	0.638234
hg19_snp151Common_rs59505224 range=chr12:79880793-79880811 5'pad=9 3'pad=9 strand=+ repeatMasking=none	-0.339663
hg19_snp151Common_rs11559908 range=chr12:79891275-79891293 5'pad=9 3'pad=9 strand=+ repeatMasking=none	-0.348381
hg19_snp151Common_rs35940476 range=chr12:80277607-80277625 5'pad=9 3'pad=9 strand=+ repeatMasking=none	1.48728
hg19_snp151Common_rs76316325 range=chr12:80361259-80361277 5'pad=9 3'pad=9 strand=+ repeatMasking=none	-0.392536
hg19_snp151Common_rs17006301 range=chr12:80413758-80413776 5'pad=9 3'pad=9 strand=+ repeatMasking=none	-0.040656
hg19_snp151Common_rs141936907 range=chr12:80445261-80445278 5'pad=9 3'pad=9 strand=+ repeatMasking=none	-0.313184
hg19_snp151Common_rs17248984 range=chr12:80716476-80716494 5'pad=9 3'pad=9 strand=+ repeatMasking=none	0.221276
hg19_snp151Common_rs11114440 range=chr12:80827586-80827604 5'pad=9 3'pad=9 strand=+ repeatMasking=none	0.333322
hg19_snp151Common_rs60216135 range=chr12:80838166-80838184 5'pad=9 3'pad=9 strand=+ repeatMasking=none	-0.457564
hg19_snp151Common_rs4525304 range=chr12:80925838-80925856 5'pad=9 3'pad=9 strand=+ repeatMasking=none	2.0449
hg19_snp151Common_rs74465650 range=chr12:81014730-81014748 5'pad=9 3'pad=9 strand=+ repeatMasking=none	2.53873
hg19_snp151Common_rs113265513 range=chr12:81509692-81509710 5'pad=9 3'pad=9 strand=+ repeatMasking=none	1.50923
hg19_snp151Common_rs55657789 range=chr12:81636379-81636397 5'pad=9 3'pad=9 strand=+ repeatMasking=none	1.98291
hg19_snp151Common_rs1921033 range=chr12:81658557-81658575 5'pad=9 3'pad=9 strand=+ repeatMasking=none	-1.10746
hg19_snp151Common_rs79258679 range=chr12:81881472-81881490 5'pad=9 3'pad=9 strand=+ repeatMasking=none	-2.5924
hg19_snp151Common_rs11114916 range=chr12:81963243-81963261 5'pad=9 3'pad=9 strand=+ repeatMasking=none	-2.29376
hg19_snp151Common_rs115987894 range=chr12:82001593-82001611 5'pad=9 3'pad=9 strand=+ repeatMasking=none	-0.577704
hg19_snp151Common_rs17691218 range=chr12:82133380-82133398 5'pad=9 3'pad=9 strand=+ repeatMasking=none	0.307297
hg19_snp151Common_rs1922552 range=chr12:82158084-82158102 5'pad=9 3'pad=9 strand=- repeatMasking=none	1.42145
hg19_snp151Common_rs6539601 range=chr12:82302793-82302811 5'pad=9 3'pad=9 strand=+ repeatMasking=none	0.253461
hg19_snp151Common_rs34736862 range=chr12:82339407-82339425 5'pad=9 3'pad=9 strand=+ repeatMasking=none	1.01997
hg19_snp151Common_rs61934122 range=chr12:82612288-82612306 5'pad=9 3'pad=9 strand=+ repeatMasking=none	1.41051
hg19_snp151Common_rs10161052 range=chr12:82645029-82645047 5'pad=9 3'pad=9 strand=+ repeatMasking=none	-1.24866
hg19_snp151Common_rs1655594 range=chr12:83399866-83399884 5'pad=9 3'pad=9 strand=+ repeatMasking=none	-0.553121
hg19_snp151Common_rs115640001 range=chr12:83406279-83406297 5'pad=9 3'pad=9 strand=+ repeatMasking=none	-0.404727
hg19_snp151Common_rs143876065 range=chr12:83471317-83471335 5'pad=9 3'pad=9 strand=+ repeatMasking=none	-0.473549
hg19_snp151Common_rs73145535 range=chr12:83720176-83720194 5'pad=9 3'pad=9 strand=+ repeatMasking=none	-1.48632
hg19_snp151Common_rs11115740 range=chr12:83728023-83728041 5'pad=9 3'pad=9 strand=+ repeatMasking=none	-0.849787
hg19_snp151Common_rs11115748 range=chr12:83751399-83751417 5'pad=9 3'pad=9 strand=+ repeatMasking=none	0.396789
hg19_snp151Common_rs4882450 range=chr12:83785456-83785474 5'pad=9 3'pad=9 strand=+ repeatMasking=none	0.33108
hg19_snp151Common_rs36064217 range=chr12:83803237-83803255 5'pad=9 3'pad=9 strand=+ repeatMasking=none	1.37208
hg19_snp151Common_rs1387938 range=chr12:83842321-83842339 5'pad=9 3'pad=9 strand=- repeatMasking=none	1.18023
hg19_snp151Common_rs74978780 range=chr12:83879607-83879625 5'pad=9 3'pad=9 strand=+ repeatMasking=none	0.86849
hg19_snp151Common_rs74107967 range=chr12:83962065-83962083 5'pad=9 3'pad=9 strand=+ repeatMasking=none	-0.614667
hg19_snp151Common_rs11116035 range=chr12:84169889-84169907 5'pad=9 3'pad=9 strand=+ repeatMasking=none	0.059647
hg19_snp151Common_rs532260402 range=chr12:84283475-84283493 5'pad=9 3'pad=9 strand=+ repeatMasking=none	2.03264
hg19_snp151Common_rs7976234 range=chr12:84493507-84493525 5'pad=9 3'pad=9 strand=+ repeatMasking=none	-2.9152
hg19_snp151Common_rs2086619 range=chr12:84494601-84494619 5'pad=9 3'pad=9 strand=- repeatMasking=none	-2.27437
hg19_snp151Common_rs11831985 range=chr12:84762999-84763017 5'pad=9 3'pad=9 strand=+ repeatMasking=none	-2.71243
hg19_snp151Common_rs7968939 range=chr12:84810022-84810040 5'pad=9 3'pad=9 strand=+ repeatMasking=none	1.04126
hg19_snp151Common_rs11116520 range=chr12:85051300-85051318 5'pad=9 3'pad=9 strand=+ repeatMasking=none	-0.393445
hg19_snp151Common_rs77362991 range=chr12:85053643-85053661 5'pad=9 3'pad=9 strand=+ repeatMasking=none	1.45982
hg19_snp151Common_rs1545495 range=chr12:85142894-85142912 5'pad=9 3'pad=9 strand=- repeatMasking=none	-2.98601
hg19_snp151Common_rs7301429 range=chr12:85235986-85236004 5'pad=9 3'pad=9 strand=+ repeatMasking=none	-1.27519
hg19_snp151Common_rs1947087 range=chr12:85309139-85309157 5'pad=9 3'pad=9 strand=- repeatMasking=none	-0.223148
hg19_snp151Common_rs61499960 range=chr12:85485426-85485444 5'pad=9 3'pad=9 strand=+ repeatMasking=none	4.75633
hg19_snp151Common_rs2708498 range=chr12:85571063-85571081 5'pad=9 3'pad=9 strand=+ repeatMasking=none	-2.20408
hg19_snp151Common_rs12306104 range=chr12:85948772-85948790 5'pad=9 3'pad=9 strand=+ repeatMasking=none	-2.55156
hg19_snp151Common_rs150779784 range=chr12:86585722-86585740 5'pad=9 3'pad=9 strand=+ repeatMasking=none	2.9997
hg19_snp151Common_rs139599258 range=chr12:86777277-86777295 5'pad=9 3'pad=9 strand=+ repeatMasking=none	-1.43384
hg19_snp151Common_rs10776981 range=chr12:86887374-86887392 5'pad=9 3'pad=9 strand=+ repeatMasking=none	-1.84664
hg19_snp151Common_rs4365118 range=chr12:87171219-87171237 5'pad=9 3'pad=9 strand=+ repeatMasking=none	-1.94719
hg19_snp151Common_rs35227751 range=chr12:87524628-87524646 5'pad=9 3'pad=9 strand=+ repeatMasking=none	-0.581265
hg19_snp151Common_rs11104306 range=chr12:87529166-87529184 5'pad=9 3'pad=9 strand=+ repeatMasking=none	-0.11161
hg19_snp151Common_rs145012416 range=chr12:87554346-87554364 5'pad=9 3'pad=9 strand=+ repeatMasking=none	-2.18073
hg19_snp151Common_rs68166481 range=chr12:87622714-87622732 5'pad=9 3'pad=9 strand=+ repeatMasking=none	0.880337
hg19_snp151Common_rs10506939 range=chr12:87654049-87654067 5'pad=9 3'pad=9 strand=+ repeatMasking=none	2.63604
hg19_snp151Common_rs11104379 range=chr12:87659980-87659998 5'pad=9 3'pad=9 strand=+ repeatMasking=none	0.046257
hg19_snp151Common_rs79939815 range=chr12:87682250-87682268 5'pad=9 3'pad=9 strand=+ repeatMasking=none	-0.838567
hg19_snp151Common_rs7139345 range=chr12:87702342-87702360 5'pad=9 3'pad=9 strand=+ repeatMasking=none	0.526916
hg19_snp151Common_rs704058 range=chr12:88033645-88033663 5'pad=9 3'pad=9 strand=- repeatMasking=none	1.37225
hg19_snp151Common_rs78850457 range=chr12:88126512-88126530 5'pad=9 3'pad=9 strand=+ repeatMasking=none	0.986531
hg19_snp151Common_rs1114194 range=chr12:88173311-88173329 5'pad=9 3'pad=9 strand=+ repeatMasking=none	-0.980414
hg19_snp151Common_rs7486761 range=chr12:88351556-88351574 5'pad=9 3'pad=9 strand=+ repeatMasking=none	-3.24648
hg19_snp151Common_rs75807406 range=chr12:88506293-88506311 5'pad=9 3'pad=9 strand=+ repeatMasking=none	-0.685134
hg19_snp151Common_rs7485589 range=chr12:88596564-88596582 5'pad=9 3'pad=9 strand=+ repeatMasking=none	-0.405831
hg19_snp151Common_rs11495048 range=chr12:88833905-88833923 5'pad=9 3'pad=9 strand=+ repeatMasking=none	2.49465
hg19_snp151Common_rs78101721 range=chr12:89962824-89962842 5'pad=9 3'pad=9 strand=+ repeatMasking=none	-1.56566
hg19_snp151Common_rs1432116 range=chr12:90889695-90889713 5'pad=9 3'pad=9 strand=+ repeatMasking=none	-2.8087
hg19_snp151Common_rs1432112 range=chr12:90893689-90893707 5'pad=9 3'pad=9 strand=- repeatMasking=none	0.662563
hg19_snp151Common_rs12303056 range=chr12:91059018-91059036 5'pad=9 3'pad=9 strand=+ repeatMasking=none	-2.64428
hg19_snp151Common_rs61924898 range=chr12:91080963-91080981 5'pad=9 3'pad=9 strand=+ repeatMasking=none	-1.0328
hg19_snp151Common_rs10735281 range=chr12:91167160-91167178 5'pad=9 3'pad=9 strand=+ repeatMasking=none	-1.2331
hg19_snp151Common_rs117904239 range=chr12:91608058-91608076 5'pad=9 3'pad=9 strand=+ repeatMasking=none	-0.476419
hg19_snp151Common_rs1522406 range=chr12:91611214-91611232 5'pad=9 3'pad=9 strand=- repeatMasking=none	1.9027
hg19_snp151Common_rs11299330 range=chr12:91639470-91639488 5'pad=9 3'pad=9 strand=+ repeatMasking=none	3.29709
hg19_snp151Common_rs76262742 range=chr12:91867449-91867467 5'pad=9 3'pad=9 strand=+ repeatMasking=none	0.770131
hg19_snp151Common_rs10859164 range=chr12:91932787-91932805 5'pad=9 3'pad=9 strand=+ repeatMasking=none	-1.66604
hg19_snp151Common_rs76122669 range=chr12:92119024-92119042 5'pad=9 3'pad=9 strand=+ repeatMasking=none	-0.642953
hg19_snp151Common_rs10859192 range=chr12:92134530-92134548 5'pad=9 3'pad=9 strand=+ repeatMasking=none	0.462875
hg19_snp151Common_rs115717963 range=chr12:92417609-92417627 5'pad=9 3'pad=9 strand=+ repeatMasking=none	-2.33959
hg19_snp151Common_rs141524362 range=chr12:92455427-92455445 5'pad=9 3'pad=9 strand=+ repeatMasking=none	-0.285211
hg19_snp151Common_rs10777388 range=chr12:92658278-92658296 5'pad=9 3'pad=9 strand=+ repeatMasking=none	0.977789
hg19_snp151Common_rs10859295 range=chr12:92687107-92687125 5'pad=9 3'pad=9 strand=+ repeatMasking=none	0.49886
hg19_snp151Common_rs60792409 range=chr12:92869247-92869265 5'pad=9 3'pad=9 strand=+ repeatMasking=none	-2.04203
hg19_snp151Common_rs4237849 range=chr12:92988040-92988058 5'pad=9 3'pad=9 strand=+ repeatMasking=none	1.16141
hg19_snp151Common_rs76069667 range=chr12:92999589-92999607 5'pad=9 3'pad=9 strand=+ repeatMasking=none	-0.827586
hg19_snp151Common_rs10507017 range=chr12:93164927-93164945 5'pad=9 3'pad=9 strand=+ repeatMasking=none	4.54492
hg19_snp151Common_rs4589345 range=chr12:93340839-93340857 5'pad=9 3'pad=9 strand=+ repeatMasking=none	0.788099
hg19_snp151Common_rs12830135 range=chr12:93545827-93545845 5'pad=9 3'pad=9 strand=+ repeatMasking=none	2.3957
hg19_snp151Common_rs10735318 range=chr12:93859546-93859564 5'pad=9 3'pad=9 strand=+ repeatMasking=none	-1.84943
hg19_snp151Common_rs79079412 range=chr12:93987186-93987204 5'pad=9 3'pad=9 strand=+ repeatMasking=none	0.625799
hg19_snp151Common_rs11829153 range=chr12:94004465-94004483 5'pad=9 3'pad=9 strand=+ repeatMasking=none	2.34165
hg19_snp151Common_rs141848683 range=chr12:94051298-94051316 5'pad=9 3'pad=9 strand=+ repeatMasking=none	-1.25915
hg19_snp151Common_rs10161389 range=chr12:94141250-94141268 5'pad=9 3'pad=9 strand=+ repeatMasking=none	-2.89016
hg19_snp151Common_rs73375435 range=chr12:94450373-94450391 5'pad=9 3'pad=9 strand=+ repeatMasking=none	1.75693
hg19_snp151Common_rs10859659 range=chr12:94488876-94488894 5'pad=9 3'pad=9 strand=+ repeatMasking=none	0.330194
hg19_snp151Common_rs7297304 range=chr12:94517259-94517277 5'pad=9 3'pad=9 strand=+ repeatMasking=none	4.25315
hg19_snp151Common_rs7955692 range=chr12:95096237-95096255 5'pad=9 3'pad=9 strand=+ repeatMasking=none	-1.46193
hg19_snp151Common_rs140520372 range=chr12:95183977-95183995 5'pad=9 3'pad=9 strand=+ repeatMasking=none	0.573336
hg19_snp151Common_rs59457231 range=chr12:95200376-95200394 5'pad=9 3'pad=9 strand=+ repeatMasking=none	-0.551187
hg19_snp151Common_rs34491390 range=chr12:95261645-95261662 5'pad=9 3'pad=9 strand=+ repeatMasking=none	-0.825005
hg19_snp151Common_rs79912865 range=chr12:95287957-95287975 5'pad=9 3'pad=9 strand=+ repeatMasking=none	2.50946
hg19_snp151Common_rs79597912 range=chr12:95288727-95288745 5'pad=9 3'pad=9 strand=+ repeatMasking=none	1.39003
hg19_snp151Common_rs144814850 range=chr12:95305902-95305920 5'pad=9 3'pad=9 strand=+ repeatMasking=none	-0.484856
hg19_snp151Common_rs80128461 range=chr12:95331861-95331879 5'pad=9 3'pad=9 strand=+ repeatMasking=none	-2.45467
hg19_snp151Common_rs76529245 range=chr12:95814923-95814941 5'pad=9 3'pad=9 strand=+ repeatMasking=none	1.32493
hg19_snp151Common_rs2367870 range=chr12:96435550-96435568 5'pad=9 3'pad=9 strand=+ repeatMasking=none	-1.01335
hg19_snp151Common_rs17025191 range=chr12:96516504-96516522 5'pad=9 3'pad=9 strand=+ repeatMasking=none	-1.47227
hg19_snp151Common_rs56339115 range=chr12:96553304-96553322 5'pad=9 3'pad=9 strand=+ repeatMasking=none	-0.638601
hg19_snp151Common_rs112402795 range=chr12:96588459-96588477 5'pad=9 3'pad=9 strand=+ repeatMasking=none	1.90046
hg19_snp151Common_rs41403749 range=chr12:96754093-96754111 5'pad=9 3'pad=9 strand=+ repeatMasking=none	2.43187
hg19_snp151Common_rs2368053 range=chr12:96826241-96826259 5'pad=9 3'pad=9 strand=+ repeatMasking=none	3.66278
hg19_snp151Common_rs74764853 range=chr12:96846991-96847009 5'pad=9 3'pad=9 strand=+ repeatMasking=none	2.27622
hg19_snp151Common_rs12230718 range=chr12:96936415-96936433 5'pad=9 3'pad=9 strand=+ repeatMasking=none	2.1601
hg19_snp151Common_rs17327035 range=chr12:97139839-97139857 5'pad=9 3'pad=9 strand=+ repeatMasking=none	-0.902011
hg19_snp151Common_rs17025902 range=chr12:97177317-97177335 5'pad=9 3'pad=9 strand=+ repeatMasking=none	1.08314
hg19_snp151Common_rs56310943 range=chr12:97217726-97217744 5'pad=9 3'pad=9 strand=+ repeatMasking=none	-1.67572
hg19_snp151Common_rs75794137 range=chr12:97309042-97309060 5'pad=9 3'pad=9 strand=+ repeatMasking=none	2.66826
hg19_snp151Common_rs76058400 range=chr12:97369933-97369951 5'pad=9 3'pad=9 strand=+ repeatMasking=none	-1.39699
hg19_snp151Common_rs146140139 range=chr12:97455298-97455315 5'pad=9 3'pad=9 strand=+ repeatMasking=none	-0.420074
hg19_snp151Common_rs146473553 range=chr12:97517678-97517696 5'pad=9 3'pad=9 strand=+ repeatMasking=none	1.26829
hg19_snp151Common_rs78039058 range=chr12:97612497-97612515 5'pad=9 3'pad=9 strand=+ repeatMasking=none	-2.12381
hg19_snp151Common_rs74827887 range=chr12:97728352-97728370 5'pad=9 3'pad=9 strand=+ repeatMasking=none	-2.05026
hg19_snp151Common_rs12303469 range=chr12:97867932-97867950 5'pad=9 3'pad=9 strand=+ repeatMasking=none	-0.837496
hg19_snp151Common_rs5800311 range=chr12:97892370-97892388 5'pad=9 3'pad=9 strand=+ repeatMasking=none	0.691315
hg19_snp151Common_rs12312506 range=chr12:97933855-97933873 5'pad=9 3'pad=9 strand=+ repeatMasking=none	0.370785
hg19_snp151Common_rs117689953 range=chr12:97939591-97939609 5'pad=9 3'pad=9 strand=+ repeatMasking=none	-1.92118
hg19_snp151Common_rs59458591 range=chr12:98048978-98048996 5'pad=9 3'pad=9 strand=+ repeatMasking=none	0.375631
hg19_snp151Common_rs35742853 range=chr12:98160676-98160694 5'pad=9 3'pad=9 strand=+ repeatMasking=none	-1.43447
hg19_snp151Common_rs17027590 range=chr12:98258864-98258882 5'pad=9 3'pad=9 strand=+ repeatMasking=none	-0.186391
hg19_snp151Common_rs77714859 range=chr12:98318885-98318903 5'pad=9 3'pad=9 strand=+ repeatMasking=none	-0.15231
hg19_snp151Common_rs150949519 range=chr12:98348082-98348100 5'pad=9 3'pad=9 strand=+ repeatMasking=none	-1.17659
hg19_snp151Common_rs111853561 range=chr12:98483375-98483393 5'pad=9 3'pad=9 strand=+ repeatMasking=none	-1.45054
hg19_snp151Common_rs71462216 range=chr12:98495703-98495721 5'pad=9 3'pad=9 strand=+ repeatMasking=none	-1.79951
hg19_snp151Common_rs7309389 range=chr12:98584619-98584637 5'pad=9 3'pad=9 strand=+ repeatMasking=none	-1.89519
hg19_snp151Common_rs17028062 range=chr12:98673937-98673955 5'pad=9 3'pad=9 strand=+ repeatMasking=none	1.48271
hg19_snp151Common_rs11109497 range=chr12:98882094-98882112 5'pad=9 3'pad=9 strand=+ repeatMasking=none	2.45162
hg19_snp151Common_rs7138837 range=chr12:99015612-99015630 5'pad=9 3'pad=9 strand=+ repeatMasking=none	1.3138
hg19_snp151Common_rs75377389 range=chr12:99044747-99044765 5'pad=9 3'pad=9 strand=+ repeatMasking=none	0.976125
hg19_snp151Common_rs74935880 range=chr12:99141995-99142013 5'pad=9 3'pad=9 strand=+ repeatMasking=none	-1.28846
hg19_snp151Common_rs4762511 range=chr12:99182251-99182269 5'pad=9 3'pad=9 strand=+ repeatMasking=none	-0.41531
hg19_snp151Common_rs715324 range=chr12:99219001-99219019 5'pad=9 3'pad=9 strand=+ repeatMasking=none	-1.603
hg19_snp151Common_rs7969490 range=chr12:99403782-99403800 5'pad=9 3'pad=9 strand=+ repeatMasking=none	-2.97186
hg19_snp151Common_rs7298691 range=chr12:99525378-99525396 5'pad=9 3'pad=9 strand=+ repeatMasking=none	2.11607
hg19_snp151Common_rs148258569 range=chr12:99584145-99584163 5'pad=9 3'pad=9 strand=+ repeatMasking=none	1.62482
hg19_snp151Common_rs79160258 range=chr12:99781562-99781580 5'pad=9 3'pad=9 strand=+ repeatMasking=none	-0.158078
hg19_snp151Common_rs2466565 range=chr12:99816385-99816403 5'pad=9 3'pad=9 strand=+ repeatMasking=none	2.58151
hg19_snp151Common_rs7976908 range=chr12:99947586-99947604 5'pad=9 3'pad=9 strand=+ repeatMasking=none	3.07349
hg19_snp151Common_rs150299157 range=chr12:100082514-100082532 5'pad=9 3'pad=9 strand=+ repeatMasking=none	-1.45831
hg19_snp151Common_rs56102136 range=chr12:100258725-100258743 5'pad=9 3'pad=9 strand=+ repeatMasking=none	1.76106
hg19_snp151Common_rs7135959 range=chr12:100331378-100331396 5'pad=9 3'pad=9 strand=+ repeatMasking=none	-0.598965
hg19_snp151Common_rs61941776 range=chr12:100767925-100767943 5'pad=9 3'pad=9 strand=+ repeatMasking=none	-2.76551
hg19_snp151Common_rs10778056 range=chr12:101023570-101023588 5'pad=9 3'pad=9 strand=+ repeatMasking=none	0.1137
hg19_snp151Common_rs193018867 range=chr12:101030576-101030594 5'pad=9 3'pad=9 strand=+ repeatMasking=none	1.48769
hg19_snp151Common_rs10778057 range=chr12:101041444-101041462 5'pad=9 3'pad=9 strand=+ repeatMasking=none	-2.1287
hg19_snp151Common_rs77761308 range=chr12:101152380-101152398 5'pad=9 3'pad=9 strand=+ repeatMasking=none	-1.86474
hg19_snp151Common_rs141419974 range=chr12:101179611-101179629 5'pad=9 3'pad=9 strand=+ repeatMasking=none	2.75864
hg19_snp151Common_rs114616874 range=chr12:101201927-101201945 5'pad=9 3'pad=9 strand=+ repeatMasking=none	-2.40604
hg19_snp151Common_rs1514784 range=chr12:101234054-101234072 5'pad=9 3'pad=9 strand=+ repeatMasking=none	-2.14557
hg19_snp151Common_rs938436 range=chr12:101344810-101344828 5'pad=9 3'pad=9 strand=+ repeatMasking=none	1.3321
hg19_snp151Common_rs12424473 range=chr12:101940355-101940373 5'pad=9 3'pad=9 strand=+ repeatMasking=none	2.04904
hg19_snp151Common_rs115904455 range=chr12:102032052-102032070 5'pad=9 3'pad=9 strand=+ repeatMasking=none	0.753857
hg19_snp151Common_rs73392431 range=chr12:102128242-102128260 5'pad=9 3'pad=9 strand=+ repeatMasking=none	0.557047
hg19_snp151Common_rs146946788 range=chr12:102222217-102222235 5'pad=9 3'pad=9 strand=+ repeatMasking=none	0.812915
hg19_snp151Common_rs115989980 range=chr12:102231456-102231474 5'pad=9 3'pad=9 strand=+ repeatMasking=none	0.931518
hg19_snp151Common_rs74696685 range=chr12:102301523-102301541 5'pad=9 3'pad=9 strand=+ repeatMasking=none	2.07775
hg19_snp151Common_rs4280054 range=chr12:102325808-102325826 5'pad=9 3'pad=9 strand=+ repeatMasking=none	1.35408
hg19_snp151Common_rs855213 range=chr12:102908288-102908306 5'pad=9 3'pad=9 strand=- repeatMasking=none	1.99367
hg19_snp151Common_rs35760 range=chr12:102950209-102950227 5'pad=9 3'pad=9 strand=- repeatMasking=none	-1.31666
hg19_snp151Common_rs149290770 range=chr12:103517245-103517263 5'pad=9 3'pad=9 strand=+ repeatMasking=none	2.20992
hg19_snp151Common_rs80134809 range=chr12:103686945-103686963 5'pad=9 3'pad=9 strand=+ repeatMasking=none	-1.87461
hg19_snp151Common_rs116159657 range=chr12:103909475-103909493 5'pad=9 3'pad=9 strand=+ repeatMasking=none	1.03634
hg19_snp151Common_rs17500749 range=chr12:103978755-103978773 5'pad=9 3'pad=9 strand=+ repeatMasking=none	-0.265148
hg19_snp151Common_rs2576977 range=chr12:104236616-104236634 5'pad=9 3'pad=9 strand=- repeatMasking=none	-1.65633
hg19_snp151Common_rs12822539 range=chr12:104249224-104249242 5'pad=9 3'pad=9 strand=+ repeatMasking=none	0.543689
hg19_snp151Common_rs7309185 range=chr12:104512823-104512841 5'pad=9 3'pad=9 strand=+ repeatMasking=none	-1.3547
hg19_snp151Common_rs150078115 range=chr12:104760571-104760589 5'pad=9 3'pad=9 strand=+ repeatMasking=none	-0.301027
hg19_snp151Common_rs60467477 range=chr12:105190367-105190385 5'pad=9 3'pad=9 strand=+ repeatMasking=none	1.45041
hg19_snp151Common_rs4393404 range=chr12:105283926-105283944 5'pad=9 3'pad=9 strand=+ repeatMasking=none	2.98737
hg19_snp151Common_rs77958386 range=chr12:105432900-105432918 5'pad=9 3'pad=9 strand=+ repeatMasking=none	2.23647
hg19_snp151Common_rs11112383 range=chr12:105531854-105531872 5'pad=9 3'pad=9 strand=+ repeatMasking=none	-0.43737
hg19_snp151Common_rs11513893 range=chr12:105910012-105910030 5'pad=9 3'pad=9 strand=+ repeatMasking=none	-0.839964
hg19_snp151Common_rs17037416 range=chr12:106070009-106070027 5'pad=9 3'pad=9 strand=+ repeatMasking=none	-1.43442
hg19_snp151Common_rs147474984 range=chr12:106141880-106141898 5'pad=9 3'pad=9 strand=+ repeatMasking=none	2.14196
hg19_snp151Common_rs201718105 range=chr12:106180976-106180994 5'pad=9 3'pad=9 strand=+ repeatMasking=none	-0.161222
hg19_snp151Common_rs78728172 range=chr12:106223303-106223321 5'pad=9 3'pad=9 strand=+ repeatMasking=none	2.28968
hg19_snp151Common_rs144610182 range=chr12:106270590-106270608 5'pad=9 3'pad=9 strand=+ repeatMasking=none	0.631347
hg19_snp151Common_rs11112852 range=chr12:106458451-106458469 5'pad=9 3'pad=9 strand=+ repeatMasking=none	-1.25097
hg19_snp151Common_rs73195607 range=chr12:106546459-106546477 5'pad=9 3'pad=9 strand=+ repeatMasking=none	-2.40261
hg19_snp151Common_rs4399406 range=chr12:107337274-107337292 5'pad=9 3'pad=9 strand=+ repeatMasking=none	-0.496651
hg19_snp151Common_rs11513903 range=chr12:107439651-107439669 5'pad=9 3'pad=9 strand=+ repeatMasking=none	-1.92098
hg19_snp151Common_rs11837249 range=chr12:107475296-107475314 5'pad=9 3'pad=9 strand=+ repeatMasking=none	-2.98036
hg19_snp151Common_rs10047522 range=chr12:107801844-107801862 5'pad=9 3'pad=9 strand=+ repeatMasking=none	0.963405
hg19_snp151Common_rs11495204 range=chr12:107927875-107927893 5'pad=9 3'pad=9 strand=+ repeatMasking=none	-0.63869
hg19_snp151Common_rs67446565 range=chr12:108098056-108098074 5'pad=9 3'pad=9 strand=+ repeatMasking=none	1.39822
hg19_snp151Common_rs74819270 range=chr12:108406723-108406741 5'pad=9 3'pad=9 strand=+ repeatMasking=none	2.65473
hg19_snp151Common_rs17041608 range=chr12:108407963-108407981 5'pad=9 3'pad=9 strand=+ repeatMasking=none	-0.631084
hg19_snp151Common_rs144394600 range=chr12:108714101-108714119 5'pad=9 3'pad=9 strand=+ repeatMasking=none	-2.10786
hg19_snp151Common_rs73402717 range=chr12:108890338-108890356 5'pad=9 3'pad=9 strand=+ repeatMasking=none	0.491976
hg19_snp151Common_rs147680147 range=chr12:109373235-109373253 5'pad=9 3'pad=9 strand=+ repeatMasking=none	-0.377729
hg19_snp151Common_rs36171909 range=chr12:109424215-109424233 5'pad=9 3'pad=9 strand=+ repeatMasking=none	-4.49832
hg19_snp151Common_rs143814872 range=chr12:109837513-109837531 5'pad=9 3'pad=9 strand=+ repeatMasking=none	-2.53997
hg19_snp151Common_rs76955555 range=chr12:109983107-109983125 5'pad=9 3'pad=9 strand=+ repeatMasking=none	-1.39742
hg19_snp151Common_rs11614986 range=chr12:110007930-110007948 5'pad=9 3'pad=9 strand=+ repeatMasking=none	-2.14941
hg19_snp151Common_rs11067376 range=chr12:110027786-110027804 5'pad=9 3'pad=9 strand=+ repeatMasking=none	2.82326
hg19_snp151Common_rs199774647 range=chr12:111245249-111245266 5'pad=9 3'pad=9 strand=+ repeatMasking=none	-0.548099
hg19_snp151Common_rs146628400 range=chr12:111273188-111273206 5'pad=9 3'pad=9 strand=+ repeatMasking=none	-0.59449
hg19_snp151Common_rs2339600 range=chr12:111365855-111365873 5'pad=9 3'pad=9 strand=+ repeatMasking=none	0.445804
hg19_snp151Common_rs115996883 range=chr12:111693162-111693180 5'pad=9 3'pad=9 strand=+ repeatMasking=none	-1.94021
hg19_snp151Common_rs56390488 range=chr12:111984045-111984063 5'pad=9 3'pad=9 strand=+ repeatMasking=none	0.573314
hg19_snp151Common_rs76751969 range=chr12:112416838-112416856 5'pad=9 3'pad=9 strand=+ repeatMasking=none	0.896097
hg19_snp151Common_rs233717 range=chr12:113039431-113039449 5'pad=9 3'pad=9 strand=- repeatMasking=none	1.72417
hg19_snp151Common_rs232927 range=chr12:113112271-113112289 5'pad=9 3'pad=9 strand=+ repeatMasking=none	2.77307
hg19_snp151Common_rs78777545 range=chr12:113117781-113117799 5'pad=9 3'pad=9 strand=+ repeatMasking=none	-0.383234
hg19_snp151Common_rs560010256 range=chr12:113150897-113150915 5'pad=9 3'pad=9 strand=+ repeatMasking=none	-2.24466
hg19_snp151Common_rs2891405 range=chr12:113152088-113152106 5'pad=9 3'pad=9 strand=+ repeatMasking=none	0.41461
hg19_snp151Common_rs11612626 range=chr12:113289015-113289033 5'pad=9 3'pad=9 strand=+ repeatMasking=none	-1.40957
hg19_snp151Common_rs2057778 range=chr12:113350787-113350805 5'pad=9 3'pad=9 strand=- repeatMasking=none	-1.60939
hg19_snp151Common_rs1732773 range=chr12:113465602-113465620 5'pad=9 3'pad=9 strand=+ repeatMasking=none	-0.416436
hg19_snp151Common_rs2701623 range=chr12:113522765-113522783 5'pad=9 3'pad=9 strand=- repeatMasking=none	-0.47056
hg19_snp151Common_rs1674117 range=chr12:113523806-113523824 5'pad=9 3'pad=9 strand=+ repeatMasking=none	2.99413
hg19_snp151Common_rs76010357 range=chr12:113690499-113690517 5'pad=9 3'pad=9 strand=+ repeatMasking=none	-1.02979
hg19_snp151Common_rs73192834 range=chr12:113721413-113721431 5'pad=9 3'pad=9 strand=+ repeatMasking=none	-2.27731
hg19_snp151Common_rs113498388 range=chr12:113767116-113767134 5'pad=9 3'pad=9 strand=+ repeatMasking=none	-0.56635
hg19_snp151Common_rs12817952 range=chr12:113868702-113868720 5'pad=9 3'pad=9 strand=+ repeatMasking=none	-1.33872
hg19_snp151Common_rs114373551 range=chr12:113901648-113901666 5'pad=9 3'pad=9 strand=+ repeatMasking=none	0.38618
hg19_snp151Common_rs141860467 range=chr12:113944527-113944545 5'pad=9 3'pad=9 strand=+ repeatMasking=none	-1.69905
hg19_snp151Common_rs57288584 range=chr12:114063320-114063338 5'pad=9 3'pad=9 strand=+ repeatMasking=none	-1.54134
hg19_snp151Common_rs11066695 range=chr12:114146691-114146709 5'pad=9 3'pad=9 strand=+ repeatMasking=none	2.46444
hg19_snp151Common_rs147958405 range=chr12:114323714-114323732 5'pad=9 3'pad=9 strand=+ repeatMasking=none	1.61342
hg19_snp151Common_rs12310777 range=chr12:114347712-114347730 5'pad=9 3'pad=9 strand=+ repeatMasking=none	1.80324
hg19_snp151Common_rs78272844 range=chr12:114630924-114630942 5'pad=9 3'pad=9 strand=+ repeatMasking=none	-2.04671
hg19_snp151Common_rs5801031 range=chr12:114654189-114654207 5'pad=9 3'pad=9 strand=+ repeatMasking=none	4.04784
hg19_snp151Common_rs143511878 range=chr12:114792516-114792534 5'pad=9 3'pad=9 strand=+ repeatMasking=none	1.11269
hg19_snp151Common_rs11067079 range=chr12:114802994-114803012 5'pad=9 3'pad=9 strand=+ repeatMasking=none	0.970467
hg19_snp151Common_rs201952797 range=chr12:114970483-114970501 5'pad=9 3'pad=9 strand=+ repeatMasking=none	0.75255
hg19_snp151Common_rs116270649 range=chr12:115052264-115052282 5'pad=9 3'pad=9 strand=+ repeatMasking=none	-0.795117
hg19_snp151Common_rs80060498 range=chr12:115129413-115129431 5'pad=9 3'pad=9 strand=+ repeatMasking=none	0.571126
hg19_snp151Common_rs78651614 range=chr12:115256926-115256944 5'pad=9 3'pad=9 strand=+ repeatMasking=none	2.61774
hg19_snp151Common_rs35474 range=chr12:115529733-115529751 5'pad=9 3'pad=9 strand=- repeatMasking=none	1.74838
hg19_snp151Common_rs147564036 range=chr12:115654678-115654696 5'pad=9 3'pad=9 strand=+ repeatMasking=none	2.87926
hg19_snp151Common_rs11837476 range=chr12:115881623-115881641 5'pad=9 3'pad=9 strand=+ repeatMasking=none	-0.310812
hg19_snp151Common_rs7974919 range=chr12:116174400-116174418 5'pad=9 3'pad=9 strand=+ repeatMasking=none	0.045973
hg19_snp151Common_rs11067942 range=chr12:116635454-116635472 5'pad=9 3'pad=9 strand=+ repeatMasking=none	-0.255948
hg19_snp151Common_rs79347782 range=chr12:116777321-116777339 5'pad=9 3'pad=9 strand=+ repeatMasking=none	-3.68566
hg19_snp151Common_rs10744878 range=chr12:116964221-116964239 5'pad=9 3'pad=9 strand=+ repeatMasking=none	0.353563
hg19_snp151Common_rs4766794 range=chr12:117005700-117005718 5'pad=9 3'pad=9 strand=+ repeatMasking=none	-1.19053
hg19_snp151Common_rs546905413 range=chr12:117176184-117176201 5'pad=9 3'pad=9 strand=+ repeatMasking=none	0.932104
hg19_snp151Common_rs58963573 range=chr12:117258971-117258989 5'pad=9 3'pad=9 strand=+ repeatMasking=none	2.12481
hg19_snp151Common_rs73403261 range=chr12:117476311-117476329 5'pad=9 3'pad=9 strand=+ repeatMasking=none	-3.62075
hg19_snp151Common_rs7959940 range=chr12:117523076-117523094 5'pad=9 3'pad=9 strand=+ repeatMasking=none	4.39191
hg19_snp151Common_rs11068397 range=chr12:117628547-117628565 5'pad=9 3'pad=9 strand=+ repeatMasking=none	-0.02799
hg19_snp151Common_rs2293052 range=chr12:117715611-117715629 5'pad=9 3'pad=9 strand=- repeatMasking=none	-1.40676
hg19_snp151Common_rs77125875 range=chr12:117740047-117740065 5'pad=9 3'pad=9 strand=+ repeatMasking=none	0.502434
hg19_snp151Common_rs112354279 range=chr12:117774935-117774953 5'pad=9 3'pad=9 strand=+ repeatMasking=none	-0.636608
hg19_snp151Common_rs115623943 range=chr12:118292352-118292370 5'pad=9 3'pad=9 strand=+ repeatMasking=none	0.777714
hg19_snp151Common_rs2570557 range=chr12:118302870-118302888 5'pad=9 3'pad=9 strand=- repeatMasking=none	2.49092
hg19_snp151Common_rs17619337 range=chr12:118325929-118325947 5'pad=9 3'pad=9 strand=+ repeatMasking=none	0.978656
hg19_snp151Common_rs76593166 range=chr12:118387299-118387317 5'pad=9 3'pad=9 strand=+ repeatMasking=none	-1.47949
hg19_snp151Common_rs4445740 range=chr12:118412464-118412482 5'pad=9 3'pad=9 strand=+ repeatMasking=none	-2.75532
hg19_snp151Common_rs112422075 range=chr12:118563813-118563831 5'pad=9 3'pad=9 strand=+ repeatMasking=none	-0.194656
hg19_snp151Common_rs74412085 range=chr12:118604941-118604959 5'pad=9 3'pad=9 strand=+ repeatMasking=none	-1.15475
hg19_snp151Common_rs111769853 range=chr12:118643023-118643041 5'pad=9 3'pad=9 strand=+ repeatMasking=none	2.01178
hg19_snp151Common_rs78468793 range=chr12:118762158-118762176 5'pad=9 3'pad=9 strand=+ repeatMasking=none	-0.012174
hg19_snp151Common_rs56400137 range=chr12:118920240-118920258 5'pad=9 3'pad=9 strand=+ repeatMasking=none	0.202071
hg19_snp151Common_rs2682764 range=chr12:119031984-119032002 5'pad=9 3'pad=9 strand=- repeatMasking=none	1.6817
hg19_snp151Common_rs115888134 range=chr12:119207737-119207755 5'pad=9 3'pad=9 strand=+ repeatMasking=none	-0.224997
hg19_snp151Common_rs10735113 range=chr12:119250356-119250374 5'pad=9 3'pad=9 strand=+ repeatMasking=none	-0.458499
hg19_snp151Common_rs11609256 range=chr12:119389529-119389547 5'pad=9 3'pad=9 strand=+ repeatMasking=none	-0.846731
hg19_snp151Common_rs138381075 range=chr12:120045787-120045805 5'pad=9 3'pad=9 strand=+ repeatMasking=none	-1.76415
hg19_snp151Common_rs113178475 range=chr12:120433766-120433784 5'pad=9 3'pad=9 strand=+ repeatMasking=none	0.5381
hg19_snp151Common_rs1710143 range=chr12:120943437-120943455 5'pad=9 3'pad=9 strand=+ repeatMasking=none	1.49548
hg19_snp151Common_rs1167718 range=chr12:120979385-120979403 5'pad=9 3'pad=9 strand=- repeatMasking=none	-0.503801
hg19_snp151Common_rs6490296 range=chr12:121051276-121051294 5'pad=9 3'pad=9 strand=+ repeatMasking=none	1.97869
hg19_snp151Common_rs111942532 range=chr12:121369955-121369973 5'pad=9 3'pad=9 strand=+ repeatMasking=none	0.075378
hg19_snp151Common_rs7960932 range=chr12:121375575-121375593 5'pad=9 3'pad=9 strand=+ repeatMasking=none	0.420179
hg19_snp151Common_rs76703262 range=chr12:121480528-121480546 5'pad=9 3'pad=9 strand=+ repeatMasking=none	3.18849
hg19_snp151Common_rs12819229 range=chr12:121773809-121773827 5'pad=9 3'pad=9 strand=+ repeatMasking=none	0.982029
hg19_snp151Common_rs115212207 range=chr12:122105299-122105317 5'pad=9 3'pad=9 strand=+ repeatMasking=none	0.651618
hg19_snp151Common_rs7309634 range=chr12:122116982-122117000 5'pad=9 3'pad=9 strand=+ repeatMasking=none	0.026194
hg19_snp151Common_rs74459612 range=chr12:122239967-122239985 5'pad=9 3'pad=9 strand=+ repeatMasking=none	0.726891
hg19_snp151Common_rs56177852 range=chr12:122339326-122339344 5'pad=9 3'pad=9 strand=+ repeatMasking=none	1.65684
hg19_snp151Common_rs28585613 range=chr12:122598051-122598069 5'pad=9 3'pad=9 strand=+ repeatMasking=none	-0.493884
hg19_snp151Common_rs2068223 range=chr12:122716059-122716077 5'pad=9 3'pad=9 strand=+ repeatMasking=none	-1.68893
hg19_snp151Common_rs10431321 range=chr12:122743729-122743747 5'pad=9 3'pad=9 strand=+ repeatMasking=none	2.56709
hg19_snp151Common_rs76587001 range=chr12:123386933-123386951 5'pad=9 3'pad=9 strand=+ repeatMasking=none	-0.430335
hg19_snp151Common_rs12310205 range=chr12:123599716-123599734 5'pad=9 3'pad=9 strand=+ repeatMasking=none	2.33811
hg19_snp151Common_rs79859086 range=chr12:124318262-124318280 5'pad=9 3'pad=9 strand=+ repeatMasking=none	2.315
hg19_snp151Common_rs11057384 range=chr12:124370755-124370773 5'pad=9 3'pad=9 strand=+ repeatMasking=none	-0.261388
hg19_snp151Common_rs34766405 range=chr12:124533614-124533632 5'pad=9 3'pad=9 strand=+ repeatMasking=none	-2.48837
hg19_snp151Common_rs61698185 range=chr12:124623616-124623634 5'pad=9 3'pad=9 strand=+ repeatMasking=none	0.411973
hg19_snp151Common_rs7308401 range=chr12:124655227-124655245 5'pad=9 3'pad=9 strand=+ repeatMasking=none	2.36078
hg19_snp151Common_rs73223554 range=chr12:124793040-124793058 5'pad=9 3'pad=9 strand=+ repeatMasking=none	2.47096
hg19_snp151Common_rs1244069 range=chr12:124845271-124845289 5'pad=9 3'pad=9 strand=- repeatMasking=none	-0.548767
hg19_snp151Common_rs1243891 range=chr12:124931656-124931674 5'pad=9 3'pad=9 strand=+ repeatMasking=none	1.5802
hg19_snp151Common_rs78073973 range=chr12:124962119-124962137 5'pad=9 3'pad=9 strand=+ repeatMasking=none	-0.746916
hg19_snp151Common_rs76859424 range=chr12:125212487-125212505 5'pad=9 3'pad=9 strand=+ repeatMasking=none	-0.56257
hg19_snp151Common_rs76606449 range=chr12:125305970-125305988 5'pad=9 3'pad=9 strand=+ repeatMasking=none	0.054852
hg19_snp151Common_rs12427061 range=chr12:125311925-125311943 5'pad=9 3'pad=9 strand=+ repeatMasking=none	2.7062
hg19_snp151Common_rs187487717 range=chr12:125461292-125461310 5'pad=9 3'pad=9 strand=+ repeatMasking=none	-1.09767
hg19_snp151Common_rs58237690 range=chr12:125543807-125543825 5'pad=9 3'pad=9 strand=+ repeatMasking=none	0.865769
hg19_snp151Common_rs2108521 range=chr12:126335455-126335473 5'pad=9 3'pad=9 strand=+ repeatMasking=none	-0.298361
hg19_snp151Common_rs12823637 range=chr12:126353214-126353232 5'pad=9 3'pad=9 strand=+ repeatMasking=none	-0.434109
hg19_snp151Common_rs114278002 range=chr12:126363434-126363452 5'pad=9 3'pad=9 strand=+ repeatMasking=none	0.911257
hg19_snp151Common_rs11559846 range=chr12:126617333-126617351 5'pad=9 3'pad=9 strand=+ repeatMasking=none	-2.43353
hg19_snp151Common_rs11058582 range=chr12:126711797-126711815 5'pad=9 3'pad=9 strand=+ repeatMasking=none	0.553409
hg19_snp151Common_rs11058595 range=chr12:126759044-126759062 5'pad=9 3'pad=9 strand=+ repeatMasking=none	0.003863
hg19_snp151Common_rs16920638 range=chr12:126912358-126912376 5'pad=9 3'pad=9 strand=+ repeatMasking=none	0.786177
hg19_snp151Common_rs7965931 range=chr12:126924162-126924180 5'pad=9 3'pad=9 strand=+ repeatMasking=none	-1.5891
hg19_snp151Common_rs7311521 range=chr12:126997232-126997250 5'pad=9 3'pad=9 strand=+ repeatMasking=none	-2.06501
hg19_snp151Common_rs138132189 range=chr12:127081342-127081360 5'pad=9 3'pad=9 strand=+ repeatMasking=none	2.48904
hg19_snp151Common_rs59106093 range=chr12:127172785-127172803 5'pad=9 3'pad=9 strand=+ repeatMasking=none	-1.15759
hg19_snp151Common_rs529112929 range=chr12:127203104-127203122 5'pad=9 3'pad=9 strand=+ repeatMasking=none	0.495427
hg19_snp151Common_rs114847107 range=chr12:127221906-127221924 5'pad=9 3'pad=9 strand=+ repeatMasking=none	-0.292958
hg19_snp151Common_rs141963677 range=chr12:127462663-127462681 5'pad=9 3'pad=9 strand=+ repeatMasking=none	1.48748
hg19_snp151Common_rs2569809 range=chr12:127504379-127504397 5'pad=9 3'pad=9 strand=+ repeatMasking=none	-0.64716
hg19_snp151Common_rs1848528 range=chr12:127705794-127705812 5'pad=9 3'pad=9 strand=+ repeatMasking=none	-2.52137
hg19_snp151Common_rs116552998 range=chr12:127943340-127943358 5'pad=9 3'pad=9 strand=+ repeatMasking=none	-0.496261
hg19_snp151Common_rs10847355 range=chr12:127958527-127958545 5'pad=9 3'pad=9 strand=+ repeatMasking=none	2.26623
hg19_snp151Common_rs2682617 range=chr12:127989903-127989921 5'pad=9 3'pad=9 strand=- repeatMasking=none	0.043398
hg19_snp151Common_rs12301383 range=chr12:128011728-128011746 5'pad=9 3'pad=9 strand=+ repeatMasking=none	-1.57901
hg19_snp151Common_rs36018836 range=chr12:128184772-128184789 5'pad=9 3'pad=9 strand=+ repeatMasking=none	-0.420548
hg19_snp151Common_rs1546117 range=chr12:128208804-128208822 5'pad=9 3'pad=9 strand=- repeatMasking=none	0.275573
hg19_snp151Common_rs11059374 range=chr12:128304409-128304427 5'pad=9 3'pad=9 strand=+ repeatMasking=none	1.77827
hg19_snp151Common_rs34744770 range=chr12:128498920-128498937 5'pad=9 3'pad=9 strand=+ repeatMasking=none	-0.068418
hg19_snp151Common_rs9739875 range=chr12:128581799-128581817 5'pad=9 3'pad=9 strand=+ repeatMasking=none	-0.407099
hg19_snp151Common_rs116196073 range=chr12:128727257-128727275 5'pad=9 3'pad=9 strand=+ repeatMasking=none	2.73714
hg19_snp151Common_rs7975709 range=chr12:128931696-128931714 5'pad=9 3'pad=9 strand=+ repeatMasking=none	-0.036929
hg19_snp151Common_rs78390089 range=chr12:128974077-128974095 5'pad=9 3'pad=9 strand=+ repeatMasking=none	1.79032
hg19_snp151Common_rs76779544 range=chr12:128994347-128994365 5'pad=9 3'pad=9 strand=+ repeatMasking=none	1.02276
hg19_snp151Common_rs201158075 range=chr12:129037638-129037656 5'pad=9 3'pad=9 strand=+ repeatMasking=none	-1.38829
hg19_snp151Common_rs7308126 range=chr12:129191027-129191045 5'pad=9 3'pad=9 strand=+ repeatMasking=none	-2.06772
hg19_snp151Common_rs35429841 range=chr12:129273496-129273514 5'pad=9 3'pad=9 strand=+ repeatMasking=none	1.24876
hg19_snp151Common_rs3741614 range=chr12:129298810-129298828 5'pad=9 3'pad=9 strand=+ repeatMasking=none	0.49045
hg19_snp151Common_rs470426 range=chr12:129485859-129485877 5'pad=9 3'pad=9 strand=- repeatMasking=none	-2.27845
hg19_snp151Common_rs540912 range=chr12:129500343-129500361 5'pad=9 3'pad=9 strand=+ repeatMasking=none	-1.51794
hg19_snp151Common_rs116555440 range=chr12:129602177-129602195 5'pad=9 3'pad=9 strand=+ repeatMasking=none	-0.936901
hg19_snp151Common_rs61944808 range=chr12:129620349-129620367 5'pad=9 3'pad=9 strand=+ repeatMasking=none	-0.241676
hg19_snp151Common_rs74693404 range=chr12:129634959-129634977 5'pad=9 3'pad=9 strand=+ repeatMasking=none	0.119376
hg19_snp151Common_rs10847807 range=chr12:129722619-129722637 5'pad=9 3'pad=9 strand=+ repeatMasking=none	-1.64273
hg19_snp151Common_rs118066343 range=chr12:129740705-129740723 5'pad=9 3'pad=9 strand=+ repeatMasking=none	1.97491
hg19_snp151Common_rs60877564 range=chr12:129744120-129744138 5'pad=9 3'pad=9 strand=+ repeatMasking=none	3.70319
hg19_snp151Common_rs1000118 range=chr12:129762184-129762202 5'pad=9 3'pad=9 strand=+ repeatMasking=none	2.47437
hg19_snp151Common_rs7972567 range=chr12:129767343-129767361 5'pad=9 3'pad=9 strand=+ repeatMasking=none	1.42394
hg19_snp151Common_rs111656666 range=chr12:129872329-129872347 5'pad=9 3'pad=9 strand=+ repeatMasking=none	-2.48912
hg19_snp151Common_rs11285078 range=chr12:130034771-130034789 5'pad=9 3'pad=9 strand=+ repeatMasking=none	0.075344
hg19_snp151Common_rs475255 range=chr12:130112448-130112466 5'pad=9 3'pad=9 strand=- repeatMasking=none	1.51198
hg19_snp151Common_rs264463 range=chr12:130187005-130187023 5'pad=9 3'pad=9 strand=+ repeatMasking=none	0.908681
hg19_snp151Common_rs12370126 range=chr12:130237703-130237721 5'pad=9 3'pad=9 strand=+ repeatMasking=none	-1.07178
hg19_snp151Common_rs11060572 range=chr12:130308308-130308326 5'pad=9 3'pad=9 strand=+ repeatMasking=none	1.68774
hg19_snp151Common_rs118161709 range=chr12:130406541-130406559 5'pad=9 3'pad=9 strand=+ repeatMasking=none	-0.090794
hg19_snp151Common_rs1696405 range=chr12:130456955-130456973 5'pad=9 3'pad=9 strand=+ repeatMasking=none	-1.05853
hg19_snp151Common_rs77595701 range=chr12:130499675-130499693 5'pad=9 3'pad=9 strand=+ repeatMasking=none	-2.07157
hg19_snp151Common_rs73165633 range=chr12:130610747-130610765 5'pad=9 3'pad=9 strand=+ repeatMasking=none	1.08865
hg19_snp151Common_rs2029936 range=chr12:130772042-130772060 5'pad=9 3'pad=9 strand=- repeatMasking=none	-0.166314
hg19_snp151Common_rs79256817 range=chr12:130797795-130797813 5'pad=9 3'pad=9 strand=+ repeatMasking=none	0.172814
hg19_snp151Common_rs115880587 range=chr12:130846637-130846655 5'pad=9 3'pad=9 strand=+ repeatMasking=none	-0.470584
hg19_snp151Common_rs369673290 range=chr12:131072108-131072126 5'pad=9 3'pad=9 strand=+ repeatMasking=none	0.550125
hg19_snp151Common_rs12813236 range=chr12:131121623-131121641 5'pad=9 3'pad=9 strand=+ repeatMasking=none	-1.37953
hg19_snp151Common_rs1872867 range=chr12:131219433-131219451 5'pad=9 3'pad=9 strand=- repeatMasking=none	2.45837
hg19_snp151Common_rs4759517 range=chr12:131283689-131283707 5'pad=9 3'pad=9 strand=+ repeatMasking=none	-0.030808
hg19_snp151Common_rs116012214 range=chr12:131328162-131328180 5'pad=9 3'pad=9 strand=+ repeatMasking=none	0.686314
hg19_snp151Common_rs74511140 range=chr12:131379527-131379545 5'pad=9 3'pad=9 strand=+ repeatMasking=none	0.455308
hg19_snp151Common_rs10848346 range=chr12:131805508-131805526 5'pad=9 3'pad=9 strand=+ repeatMasking=none	0.164556
hg19_snp151Common_rs80062816 range=chr12:132028639-132028657 5'pad=9 3'pad=9 strand=+ repeatMasking=none	0.783366
hg19_snp151Common_rs7965123 range=chr12:132046139-132046157 5'pad=9 3'pad=9 strand=+ repeatMasking=none	-2.63757
hg19_snp151Common_rs7959669 range=chr12:132401675-132401693 5'pad=9 3'pad=9 strand=+ repeatMasking=none	0.773196
hg19_snp151Common_rs75594148 range=chr12:132413678-132413696 5'pad=9 3'pad=9 strand=+ repeatMasking=none	-0.791658
hg19_snp151Common_rs112111578 range=chr12:132519171-132519189 5'pad=9 3'pad=9 strand=+ repeatMasking=none	-0.919462
hg19_snp151Common_rs66472643 range=chr12:132598340-132598358 5'pad=9 3'pad=9 strand=+ repeatMasking=none	0.233576
hg19_snp151Common_rs61942925 range=chr12:132633261-132633279 5'pad=9 3'pad=9 strand=+ repeatMasking=none	-0.850147
hg19_snp151Common_rs12307821 range=chr12:132662946-132662964 5'pad=9 3'pad=9 strand=+ repeatMasking=none	-0.933621
hg19_snp151Common_rs140856677 range=chr12:132692603-132692621 5'pad=9 3'pad=9 strand=+ repeatMasking=none	-0.63852
hg19_snp151Common_rs116094904 range=chr12:132855042-132855060 5'pad=9 3'pad=9 strand=+ repeatMasking=none	0.350298
hg19_snp151Common_rs148157595 range=chr12:132856542-132856560 5'pad=9 3'pad=9 strand=+ repeatMasking=none	3.45187
hg19_snp151Common_rs146539821 range=chr12:132914303-132914321 5'pad=9 3'pad=9 strand=+ repeatMasking=none	4.28775
hg19_snp151Common_rs71453150 range=chr12:132977722-132977740 5'pad=9 3'pad=9 strand=+ repeatMasking=none	-0.671935
hg19_snp151Common_rs75629604 range=chr12:133015418-133015436 5'pad=9 3'pad=9 strand=+ repeatMasking=none	0.326852
hg19_snp151Common_rs11147042 range=chr12:133036854-133036872 5'pad=9 3'pad=9 strand=+ repeatMasking=none	0.367194
hg19_snp151Common_rs79228077 range=chr12:133046334-133046352 5'pad=9 3'pad=9 strand=+ repeatMasking=none	-1.14455
hg19_snp151Common_rs4883610 range=chr12:133278066-133278084 5'pad=9 3'pad=9 strand=- repeatMasking=none	-3.25875
hg19_snp151Common_rs572757038 range=chr12:133421029-133421047 5'pad=9 3'pad=9 strand=+ repeatMasking=none	-0.02732
hg19_snp151Common_rs75243679 range=chr12:133727208-133727226 5'pad=9 3'pad=9 strand=+ repeatMasking=none	-0.042632
hg19_snp151Common_rs116671578 range=chr12:8371657-8371675 5'pad=9 3'pad=9 strand=+ repeatMasking=none	0.588529
hg19_snp151Common_rs12581470 range=chr12:9464819-9464837 5'pad=9 3'pad=9 strand=+ repeatMasking=none	0.839659
hg19_snp151Common_rs4764213 range=chr12:15747055-15747073 5'pad=9 3'pad=9 strand=+ repeatMasking=none	-0.764756
hg19_snp151Common_rs11056647 range=chr12:15952138-15952156 5'pad=9 3'pad=9 strand=+ repeatMasking=none	-0.459649
hg19_snp151Common_rs73296966 range=chr12:26149362-26149380 5'pad=9 3'pad=9 strand=+ repeatMasking=none	0.998703
hg19_snp151Common_rs78391516 range=chr12:40204494-40204512 5'pad=9 3'pad=9 strand=+ repeatMasking=none	-1.09836
hg19_snp151Common_rs11613035 range=chr12:41376440-41376458 5'pad=9 3'pad=9 strand=+ repeatMasking=none	1.86782
hg19_snp151Common_rs185667206 range=chr12:41554604-41554622 5'pad=9 3'pad=9 strand=+ repeatMasking=none	1.1582
hg19_snp151Common_rs188768518 range=chr12:53292948-53292966 5'pad=9 3'pad=9 strand=+ repeatMasking=none	-0.167165
hg19_snp151Common_rs1729798 range=chr12:58747669-58747687 5'pad=9 3'pad=9 strand=+ repeatMasking=none	0.669137
hg19_snp151Common_rs4556581 range=chr12:60348007-60348025 5'pad=9 3'pad=9 strand=+ repeatMasking=none	-2.13762
hg19_snp151Common_rs116095803 range=chr12:62592818-62592836 5'pad=9 3'pad=9 strand=+ repeatMasking=none	-0.151744
hg19_snp151Common_rs12308455 range=chr12:62793859-62793877 5'pad=9 3'pad=9 strand=+ repeatMasking=none	2.41044
hg19_snp151Common_rs76634405 range=chr12:70753666-70753684 5'pad=9 3'pad=9 strand=+ repeatMasking=none	0.960014
hg19_snp151Common_rs2222322 range=chr12:73720173-73720191 5'pad=9 3'pad=9 strand=+ repeatMasking=none	2.94191
hg19_snp151Common_rs368247 range=chr12:78461545-78461563 5'pad=9 3'pad=9 strand=+ repeatMasking=none	1.56877
hg19_snp151Common_rs12822237 range=chr12:78554295-78554313 5'pad=9 3'pad=9 strand=+ repeatMasking=none	-2.01184
hg19_snp151Common_rs147704266 range=chr12:78687936-78687954 5'pad=9 3'pad=9 strand=+ repeatMasking=none	0.93005
hg19_snp151Common_rs1452246 range=chr12:85168216-85168234 5'pad=9 3'pad=9 strand=- repeatMasking=none	1.53272

## Sheet: 3d_hOEAEs
SNP	Score		KRT SNP	Score	Count Less Than	p-value	Bonferroni corrected p value
hg19_snp_rs1027421 range=chr1:64688626-64688644 5'pad=9 3'pad=9 strand=+ repeatMasking=none	0.878561	1	chr12:53340591-53340609	-3.0546	67	0.067	0.938
hg19_snp150Common_rs10749856 range=chr1:46164837-46164855 5'pad=9 3'pad=9 strand=+ repeatMasking=none	2.00514	2	chr12:53344309-53344327	-4.66947	17	0.017	0.238
hg19_snp150Common_rs10801482 range=chr1:195834165-195834183 5'pad=9 3'pad=9 strand=+ repeatMasking=none	0.254698	3	chr12:53346741-53346759	3.14743	929	0.929	13.006
hg19_snp150Common_rs10916393 range=chr1:224350754-224350772 5'pad=9 3'pad=9 strand=+ repeatMasking=none	2.90287	4	chr12:53351199-53351217	0.500057	613	0.613	8.582
hg19_snp150Common_rs111843265 range=chr1:15325241-15325259 5'pad=9 3'pad=9 strand=+ repeatMasking=none	-1.03936	5	chr12:53352563-53352581	1.89344	832	0.832	11.648
hg19_snp150Common_rs112231831 range=chr1:61972030-61972048 5'pad=9 3'pad=9 strand=+ repeatMasking=none	3.06736	6	chr12:53353401-53353419	-1.05969	293	0.293	4.102
hg19_snp150Common_rs112309400 range=chr1:54756601-54756619 5'pad=9 3'pad=9 strand=+ repeatMasking=none	1.88474	7	chr12:53353750-53353768	-0.909206	312	0.312	4.368
hg19_snp150Common_rs112329899 range=chr1:115964674-115964692 5'pad=9 3'pad=9 strand=+ repeatMasking=none	-2.2099	8	chr12:53354613-53354631	1.39352	769	0.769	10.766
hg19_snp150Common_rs114133233 range=chr1:201137067-201137085 5'pad=9 3'pad=9 strand=+ repeatMasking=none	-0.220973	9	chr12:53355548-53355566	-0.057047	482	0.482	6.748
hg19_snp150Common_rs114191788 range=chr1:35511072-35511090 5'pad=9 3'pad=9 strand=+ repeatMasking=none	-3.90864	10	chr12:53355670-53355688	1.84947	829	0.829	11.606
hg19_snp150Common_rs1156678 range=chr1:196635766-196635784 5'pad=9 3'pad=9 strand=- repeatMasking=none	0.949454	11	chr12:53357326-53357344	-1.73146	180	0.18	2.52
hg19_snp150Common_rs11589854 range=chr1:232603717-232603735 5'pad=9 3'pad=9 strand=+ repeatMasking=none	-3.23873	12	chr12:53358025-53358043	-4.18479	25	0.025	0.35
hg19_snp150Common_rs11809339 range=chr1:146578298-146578316 5'pad=9 3'pad=9 strand=+ repeatMasking=none	0.303385	13	chr12:53359109-53359127	0.637703	635	0.635	8.89
hg19_snp150Common_rs12037702 range=chr1:234411812-234411830 5'pad=9 3'pad=9 strand=+ repeatMasking=none	2.05589	14	chr12:53360522-53360540	-2.05507	142	0.142	1.988
hg19_snp150Common_rs12038154 range=chr1:189807625-189807643 5'pad=9 3'pad=9 strand=+ repeatMasking=none	0.211715
hg19_snp150Common_rs12048954 range=chr1:47146399-47146417 5'pad=9 3'pad=9 strand=+ repeatMasking=none	-3.30504
hg19_snp150Common_rs12094821 range=chr1:120193523-120193541 5'pad=9 3'pad=9 strand=+ repeatMasking=none	0.04725
hg19_snp150Common_rs12130284 range=chr1:86867856-86867874 5'pad=9 3'pad=9 strand=+ repeatMasking=none	0.950135
hg19_snp150Common_rs12139676 range=chr1:42201838-42201856 5'pad=9 3'pad=9 strand=+ repeatMasking=none	0.215933
hg19_snp150Common_rs12402482 range=chr1:221327539-221327557 5'pad=9 3'pad=9 strand=+ repeatMasking=none	-1.15785
hg19_snp150Common_rs12564991 range=chr1:231084171-231084189 5'pad=9 3'pad=9 strand=+ repeatMasking=none	-0.237814
hg19_snp150Common_rs12568794 range=chr1:158846090-158846108 5'pad=9 3'pad=9 strand=+ repeatMasking=none	1.96788
hg19_snp150Common_rs12720686 range=chr1:186946622-186946640 5'pad=9 3'pad=9 strand=+ repeatMasking=none	-0.675585
hg19_snp150Common_rs13375673 range=chr1:18414913-18414931 5'pad=9 3'pad=9 strand=+ repeatMasking=none	1.89177
hg19_snp150Common_rs138832241 range=chr1:147275074-147275092 5'pad=9 3'pad=9 strand=+ repeatMasking=none	1.68775
hg19_snp150Common_rs1416980 range=chr1:216454787-216454805 5'pad=9 3'pad=9 strand=- repeatMasking=none	-0.175668
hg19_snp150Common_rs143122494 range=chr1:101268968-101268986 5'pad=9 3'pad=9 strand=+ repeatMasking=none	0.592726
hg19_snp150Common_rs144642274 range=chr1:31970294-31970312 5'pad=9 3'pad=9 strand=+ repeatMasking=none	0.440603
hg19_snp150Common_rs145760612 range=chr1:55198595-55198613 5'pad=9 3'pad=9 strand=+ repeatMasking=none	-0.374114
hg19_snp150Common_rs146720893 range=chr1:119619412-119619430 5'pad=9 3'pad=9 strand=+ repeatMasking=none	-2.27298
hg19_snp150Common_rs148693858 range=chr1:117828363-117828381 5'pad=9 3'pad=9 strand=+ repeatMasking=none	-2.81529
hg19_snp150Common_rs149241102 range=chr1:20896871-20896889 5'pad=9 3'pad=9 strand=+ repeatMasking=none	0.641451
hg19_snp150Common_rs149533752 range=chr1:187915809-187915827 5'pad=9 3'pad=9 strand=+ repeatMasking=none	1.97098
hg19_snp150Common_rs16823681 range=chr1:37407448-37407466 5'pad=9 3'pad=9 strand=+ repeatMasking=none	1.30115
hg19_snp150Common_rs16859269 range=chr1:233735029-233735047 5'pad=9 3'pad=9 strand=+ repeatMasking=none	0.739415
hg19_snp150Common_rs17094144 range=chr1:74135424-74135442 5'pad=9 3'pad=9 strand=+ repeatMasking=none	1.16122
hg19_snp150Common_rs17109076 range=chr1:54129696-54129714 5'pad=9 3'pad=9 strand=+ repeatMasking=none	2.49746
hg19_snp150Common_rs1725399 range=chr1:91284400-91284418 5'pad=9 3'pad=9 strand=+ repeatMasking=none	2.9697
hg19_snp150Common_rs17407971 range=chr1:105504793-105504811 5'pad=9 3'pad=9 strand=+ repeatMasking=none	1.58122
hg19_snp150Common_rs17549790 range=chr1:197013469-197013487 5'pad=9 3'pad=9 strand=- repeatMasking=none	1.0742
hg19_snp150Common_rs17574363 range=chr1:74122290-74122308 5'pad=9 3'pad=9 strand=+ repeatMasking=none	1.06844
hg19_snp150Common_rs1837857 range=chr1:30144988-30145006 5'pad=9 3'pad=9 strand=+ repeatMasking=none	0.019839
hg19_snp150Common_rs2036194 range=chr1:167216794-167216812 5'pad=9 3'pad=9 strand=- repeatMasking=none	0.707509
hg19_snp150Common_rs2078348 range=chr1:28563075-28563093 5'pad=9 3'pad=9 strand=+ repeatMasking=none	2.64496
hg19_snp150Common_rs2135696 range=chr1:154724955-154724973 5'pad=9 3'pad=9 strand=+ repeatMasking=none	-1.221
hg19_snp150Common_rs2494205 range=chr1:163459604-163459622 5'pad=9 3'pad=9 strand=- repeatMasking=none	-0.790662
hg19_snp150Common_rs2500105 range=chr1:183809094-183809112 5'pad=9 3'pad=9 strand=- repeatMasking=none	-2.71606
hg19_snp150Common_rs2744900 range=chr1:71504381-71504399 5'pad=9 3'pad=9 strand=+ repeatMasking=none	1.20802
hg19_snp150Common_rs2815706 range=chr1:28362219-28362237 5'pad=9 3'pad=9 strand=- repeatMasking=none	2.47927
hg19_snp150Common_rs28370011 range=chr1:223901227-223901245 5'pad=9 3'pad=9 strand=+ repeatMasking=none	1.77592
hg19_snp150Common_rs28718350 range=chr1:863490-863508 5'pad=9 3'pad=9 strand=+ repeatMasking=none	3.21551
hg19_snp150Common_rs28870717 range=chr1:206219701-206219719 5'pad=9 3'pad=9 strand=+ repeatMasking=none	0.625635
hg19_snp150Common_rs28970802 range=chr1:46173472-46173490 5'pad=9 3'pad=9 strand=+ repeatMasking=none	-1.93549
hg19_snp150Common_rs2986192 range=chr1:5319057-5319075 5'pad=9 3'pad=9 strand=- repeatMasking=none	0.379833
hg19_snp150Common_rs2999852 range=chr1:163309293-163309311 5'pad=9 3'pad=9 strand=+ repeatMasking=none	-2.01554
hg19_snp150Common_rs34877404 range=chr1:115646476-115646494 5'pad=9 3'pad=9 strand=+ repeatMasking=none	1.42596
hg19_snp150Common_rs462975 range=chr1:112686119-112686137 5'pad=9 3'pad=9 strand=- repeatMasking=none	2.11034
hg19_snp150Common_rs4655518 range=chr1:66039849-66039867 5'pad=9 3'pad=9 strand=+ repeatMasking=none	-0.811751
hg19_snp150Common_rs4908098 range=chr1:101227669-101227687 5'pad=9 3'pad=9 strand=+ repeatMasking=none	1.18406
hg19_snp150Common_rs543459532 range=chr1:30421525-30421543 5'pad=9 3'pad=9 strand=+ repeatMasking=none	-1.51973
hg19_snp150Common_rs550615335 range=chr1:2933149-2933167 5'pad=9 3'pad=9 strand=+ repeatMasking=none	1.38754
hg19_snp150Common_rs561364125 range=chr1:173041877-173041895 5'pad=9 3'pad=9 strand=+ repeatMasking=none	-1.22798
hg19_snp150Common_rs56383778 range=chr1:117046968-117046986 5'pad=9 3'pad=9 strand=+ repeatMasking=none	-3.26907
hg19_snp150Common_rs59068005 range=chr1:18305814-18305832 5'pad=9 3'pad=9 strand=+ repeatMasking=none	-1.0716
hg19_snp150Common_rs60429964 range=chr1:160855223-160855241 5'pad=9 3'pad=9 strand=+ repeatMasking=none	2.15033
hg19_snp150Common_rs61239596 range=chr1:60015685-60015703 5'pad=9 3'pad=9 strand=+ repeatMasking=none	0.33556
hg19_snp150Common_rs61458907 range=chr1:7578939-7578957 5'pad=9 3'pad=9 strand=+ repeatMasking=none	0.888135
hg19_snp150Common_rs61784483 range=chr1:64817161-64817179 5'pad=9 3'pad=9 strand=+ repeatMasking=none	-6.51887
hg19_snp150Common_rs6656320 range=chr1:212366372-212366390 5'pad=9 3'pad=9 strand=+ repeatMasking=none	-0.140381
hg19_snp150Common_rs6656352 range=chr1:224326723-224326741 5'pad=9 3'pad=9 strand=+ repeatMasking=none	-0.465033
hg19_snp150Common_rs6665652 range=chr1:178010848-178010866 5'pad=9 3'pad=9 strand=+ repeatMasking=none	3.00608
hg19_snp150Common_rs6667327 range=chr1:86007790-86007808 5'pad=9 3'pad=9 strand=+ repeatMasking=none	-0.481693
hg19_snp150Common_rs6670702 range=chr1:59722550-59722568 5'pad=9 3'pad=9 strand=+ repeatMasking=none	-0.020685
hg19_snp150Common_rs6675397 range=chr1:175455368-175455386 5'pad=9 3'pad=9 strand=+ repeatMasking=none	0.663383
hg19_snp150Common_rs6684231 range=chr1:53635235-53635253 5'pad=9 3'pad=9 strand=+ repeatMasking=none	-2.34604
hg19_snp150Common_rs6688462 range=chr1:230408054-230408072 5'pad=9 3'pad=9 strand=+ repeatMasking=none	3.98302
hg19_snp150Common_rs72671257 range=chr1:42309392-42309410 5'pad=9 3'pad=9 strand=+ repeatMasking=none	0.920983
hg19_snp150Common_rs72969696 range=chr1:98563299-98563317 5'pad=9 3'pad=9 strand=+ repeatMasking=none	0.716577
hg19_snp150Common_rs74121626 range=chr1:169324785-169324803 5'pad=9 3'pad=9 strand=+ repeatMasking=none	1.69115
hg19_snp150Common_rs74629420 range=chr1:17679502-17679520 5'pad=9 3'pad=9 strand=+ repeatMasking=none	2.71309
hg19_snp150Common_rs7512458 range=chr1:51930223-51930241 5'pad=9 3'pad=9 strand=+ repeatMasking=none	-0.519995
hg19_snp150Common_rs7513342 range=chr1:149709356-149709374 5'pad=9 3'pad=9 strand=+ repeatMasking=none	-1.64578
hg19_snp150Common_rs7518611 range=chr1:13939536-13939554 5'pad=9 3'pad=9 strand=+ repeatMasking=none	-3.82386
hg19_snp150Common_rs7525131 range=chr1:199176432-199176450 5'pad=9 3'pad=9 strand=+ repeatMasking=none	0.390466
hg19_snp150Common_rs7536802 range=chr1:81052229-81052247 5'pad=9 3'pad=9 strand=+ repeatMasking=none	-0.323048
hg19_snp150Common_rs75459539 range=chr1:116617653-116617671 5'pad=9 3'pad=9 strand=+ repeatMasking=none	1.53955
hg19_snp150Common_rs7552526 range=chr1:175075750-175075768 5'pad=9 3'pad=9 strand=+ repeatMasking=none	-0.101902
hg19_snp150Common_rs76669357 range=chr1:185484301-185484319 5'pad=9 3'pad=9 strand=+ repeatMasking=none	1.8235
hg19_snp150Common_rs76981515 range=chr1:19863113-19863131 5'pad=9 3'pad=9 strand=+ repeatMasking=none	2.78945
hg19_snp150Common_rs77764499 range=chr1:187789059-187789077 5'pad=9 3'pad=9 strand=+ repeatMasking=none	1.7078
hg19_snp150Common_rs77838954 range=chr1:115877067-115877085 5'pad=9 3'pad=9 strand=+ repeatMasking=none	1.00566
hg19_snp150Common_rs78127234 range=chr1:109833145-109833163 5'pad=9 3'pad=9 strand=+ repeatMasking=none	-1.53887
hg19_snp150Common_rs78777859 range=chr1:41286725-41286743 5'pad=9 3'pad=9 strand=+ repeatMasking=none	-5.65261
hg19_snp150Common_rs79775072 range=chr1:118429762-118429780 5'pad=9 3'pad=9 strand=+ repeatMasking=none	0.389276
hg19_snp150Common_rs80144373 range=chr1:244587460-244587478 5'pad=9 3'pad=9 strand=+ repeatMasking=none	3.84021
hg19_snp150Common_rs80236517 range=chr1:201262917-201262935 5'pad=9 3'pad=9 strand=+ repeatMasking=none	-2.64078
hg19_snp150Common_rs958564 range=chr1:185468910-185468928 5'pad=9 3'pad=9 strand=+ repeatMasking=none	1.20497
hg19_snp150Common_rs10192706 range=chr2:133090128-133090146 5'pad=9 3'pad=9 strand=+ repeatMasking=none	1.00679
hg19_snp150Common_rs10193556 range=chr2:169521495-169521513 5'pad=9 3'pad=9 strand=+ repeatMasking=none	-1.2176
hg19_snp150Common_rs11126695 range=chr2:79323404-79323422 5'pad=9 3'pad=9 strand=+ repeatMasking=none	-2.00848
hg19_snp150Common_rs111390538 range=chr2:53120873-53120891 5'pad=9 3'pad=9 strand=+ repeatMasking=none	-1.3592
hg19_snp150Common_rs111596357 range=chr2:81535225-81535243 5'pad=9 3'pad=9 strand=+ repeatMasking=none	-2.65577
hg19_snp150Common_rs112873274 range=chr2:60930060-60930078 5'pad=9 3'pad=9 strand=+ repeatMasking=none	-2.31294
hg19_snp150Common_rs113224734 range=chr2:58007881-58007899 5'pad=9 3'pad=9 strand=+ repeatMasking=none	0.425596
hg19_snp150Common_rs113838176 range=chr2:124930407-124930425 5'pad=9 3'pad=9 strand=+ repeatMasking=none	4.90051
hg19_snp150Common_rs114069831 range=chr2:139494346-139494364 5'pad=9 3'pad=9 strand=+ repeatMasking=none	0.666728
hg19_snp150Common_rs114306485 range=chr2:4361899-4361917 5'pad=9 3'pad=9 strand=+ repeatMasking=none	-2.28564
hg19_snp150Common_rs114499018 range=chr2:234195552-234195570 5'pad=9 3'pad=9 strand=+ repeatMasking=none	-0.992842
hg19_snp150Common_rs114790824 range=chr2:112869852-112869870 5'pad=9 3'pad=9 strand=+ repeatMasking=none	-0.672208
hg19_snp150Common_rs115195126 range=chr2:43154265-43154283 5'pad=9 3'pad=9 strand=+ repeatMasking=none	-1.75417
hg19_snp150Common_rs115564072 range=chr2:169233213-169233231 5'pad=9 3'pad=9 strand=+ repeatMasking=none	-1.26443
hg19_snp150Common_rs115580843 range=chr2:53324940-53324958 5'pad=9 3'pad=9 strand=+ repeatMasking=none	-3.66012
hg19_snp150Common_rs11691919 range=chr2:122877658-122877676 5'pad=9 3'pad=9 strand=+ repeatMasking=none	-2.55627
hg19_snp150Common_rs11695394 range=chr2:184778791-184778809 5'pad=9 3'pad=9 strand=+ repeatMasking=none	3.41317
hg19_snp150Common_rs117802003 range=chr2:114534255-114534273 5'pad=9 3'pad=9 strand=+ repeatMasking=none	-2.25631
hg19_snp150Common_rs11885240 range=chr2:231824451-231824469 5'pad=9 3'pad=9 strand=+ repeatMasking=none	1.3723
hg19_snp150Common_rs11900734 range=chr2:126375255-126375273 5'pad=9 3'pad=9 strand=+ repeatMasking=none	-0.375727
hg19_snp150Common_rs11903503 range=chr2:215389619-215389637 5'pad=9 3'pad=9 strand=+ repeatMasking=none	1.6987
hg19_snp150Common_rs12988245 range=chr2:176164908-176164926 5'pad=9 3'pad=9 strand=+ repeatMasking=none	0.34712
hg19_snp150Common_rs13389805 range=chr2:86874839-86874857 5'pad=9 3'pad=9 strand=+ repeatMasking=none	-1.95551
hg19_snp150Common_rs13395228 range=chr2:124457926-124457944 5'pad=9 3'pad=9 strand=+ repeatMasking=none	0.147656
hg19_snp150Common_rs13423778 range=chr2:103304109-103304127 5'pad=9 3'pad=9 strand=+ repeatMasking=none	-1.30872
hg19_snp150Common_rs13428607 range=chr2:47655783-47655801 5'pad=9 3'pad=9 strand=+ repeatMasking=none	-0.202587
hg19_snp150Common_rs13431868 range=chr2:231546195-231546213 5'pad=9 3'pad=9 strand=+ repeatMasking=none	-2.78356
hg19_snp150Common_rs138629981 range=chr2:6368710-6368728 5'pad=9 3'pad=9 strand=+ repeatMasking=none	-0.114798
hg19_snp150Common_rs139449599 range=chr2:115705931-115705949 5'pad=9 3'pad=9 strand=+ repeatMasking=none	0.014885
hg19_snp150Common_rs140512695 range=chr2:51490691-51490709 5'pad=9 3'pad=9 strand=+ repeatMasking=none	-0.464745
hg19_snp150Common_rs141954031 range=chr2:216824796-216824814 5'pad=9 3'pad=9 strand=+ repeatMasking=none	2.28425
hg19_snp150Common_rs148986822 range=chr2:233628446-233628464 5'pad=9 3'pad=9 strand=+ repeatMasking=none	1.34486
hg19_snp150Common_rs150619540 range=chr2:159894641-159894659 5'pad=9 3'pad=9 strand=+ repeatMasking=none	-2.48898
hg19_snp150Common_rs1582342 range=chr2:65709776-65709794 5'pad=9 3'pad=9 strand=+ repeatMasking=none	17.8731
hg19_snp150Common_rs1593229 range=chr2:57400269-57400287 5'pad=9 3'pad=9 strand=+ repeatMasking=none	-0.080151
hg19_snp150Common_rs1667019 range=chr2:2866854-2866872 5'pad=9 3'pad=9 strand=- repeatMasking=none	0.161831
hg19_snp150Common_rs16860605 range=chr2:173363276-173363294 5'pad=9 3'pad=9 strand=+ repeatMasking=none	-0.540487
hg19_snp150Common_rs17575609 range=chr2:62767544-62767562 5'pad=9 3'pad=9 strand=+ repeatMasking=none	-0.835165
hg19_snp150Common_rs182269257 range=chr2:44501593-44501611 5'pad=9 3'pad=9 strand=+ repeatMasking=none	-1.82178
hg19_snp150Common_rs184805474 range=chr2:76953090-76953108 5'pad=9 3'pad=9 strand=+ repeatMasking=none	3.14886
hg19_snp150Common_rs187181 range=chr2:71412117-71412135 5'pad=9 3'pad=9 strand=- repeatMasking=none	-3.11098
hg19_snp150Common_rs187407143 range=chr2:86564453-86564471 5'pad=9 3'pad=9 strand=+ repeatMasking=none	-0.41764
hg19_snp150Common_rs1986514 range=chr2:24467001-24467019 5'pad=9 3'pad=9 strand=+ repeatMasking=none	0.679566
hg19_snp150Common_rs1991996 range=chr2:126112421-126112439 5'pad=9 3'pad=9 strand=+ repeatMasking=none	-0.298078
hg19_snp150Common_rs1996872 range=chr2:138818592-138818610 5'pad=9 3'pad=9 strand=+ repeatMasking=none	-0.886108
hg19_snp150Common_rs2263641 range=chr2:118394551-118394569 5'pad=9 3'pad=9 strand=+ repeatMasking=none	0.459353
hg19_snp150Common_rs2570490 range=chr2:104451540-104451558 5'pad=9 3'pad=9 strand=- repeatMasking=none	0.151283
hg19_snp150Common_rs2599196 range=chr2:91709895-91709913 5'pad=9 3'pad=9 strand=- repeatMasking=none	-0.475127
hg19_snp150Common_rs264965 range=chr2:104255910-104255928 5'pad=9 3'pad=9 strand=+ repeatMasking=none	-2.73513
hg19_snp150Common_rs28433605 range=chr2:1136347-1136365 5'pad=9 3'pad=9 strand=+ repeatMasking=none	1.69989
hg19_snp150Common_rs308902 range=chr2:86843749-86843767 5'pad=9 3'pad=9 strand=- repeatMasking=none	-0.503365
hg19_snp150Common_rs312972 range=chr2:21372581-21372599 5'pad=9 3'pad=9 strand=- repeatMasking=none	3.37992
hg19_snp150Common_rs34547318 range=chr2:26746385-26746403 5'pad=9 3'pad=9 strand=+ repeatMasking=none	-1.01344
hg19_snp150Common_rs35816068 range=chr2:13393141-13393159 5'pad=9 3'pad=9 strand=+ repeatMasking=none	3.19742
hg19_snp150Common_rs4588241 range=chr2:134095529-134095547 5'pad=9 3'pad=9 strand=+ repeatMasking=none	-0.016853
hg19_snp150Common_rs4666856 range=chr2:183425802-183425820 5'pad=9 3'pad=9 strand=+ repeatMasking=none	-0.070121
hg19_snp150Common_rs4669343 range=chr2:8970473-8970491 5'pad=9 3'pad=9 strand=+ repeatMasking=none	2.39804
hg19_snp150Common_rs4850794 range=chr2:193712439-193712457 5'pad=9 3'pad=9 strand=+ repeatMasking=none	3.7809
hg19_snp150Common_rs55770448 range=chr2:67137178-67137196 5'pad=9 3'pad=9 strand=+ repeatMasking=none	0.226673
hg19_snp150Common_rs565209218 range=chr2:158996184-158996202 5'pad=9 3'pad=9 strand=+ repeatMasking=none	0.029632
hg19_snp150Common_rs58757346 range=chr2:57699122-57699140 5'pad=9 3'pad=9 strand=+ repeatMasking=none	4.54483
hg19_snp150Common_rs58873262 range=chr2:123143899-123143917 5'pad=9 3'pad=9 strand=+ repeatMasking=none	1.97462
hg19_snp150Common_rs58982621 range=chr2:205916294-205916312 5'pad=9 3'pad=9 strand=+ repeatMasking=none	2.37038
hg19_snp150Common_rs59432223 range=chr2:108807033-108807051 5'pad=9 3'pad=9 strand=+ repeatMasking=none	2.52904
hg19_snp150Common_rs61313894 range=chr2:120150496-120150514 5'pad=9 3'pad=9 strand=+ repeatMasking=none	-0.669224
hg19_snp150Common_rs62158290 range=chr2:67563543-67563561 5'pad=9 3'pad=9 strand=+ repeatMasking=none	-3.20315
hg19_snp150Common_rs6433760 range=chr2:180017143-180017161 5'pad=9 3'pad=9 strand=+ repeatMasking=none	0.106131
hg19_snp150Common_rs6436343 range=chr2:223648928-223648946 5'pad=9 3'pad=9 strand=+ repeatMasking=none	3.2816
hg19_snp150Common_rs6713091 range=chr2:150628777-150628795 5'pad=9 3'pad=9 strand=+ repeatMasking=none	0.086622
hg19_snp150Common_rs6723772 range=chr2:12994683-12994701 5'pad=9 3'pad=9 strand=+ repeatMasking=none	1.90282
hg19_snp150Common_rs6747101 range=chr2:230103362-230103380 5'pad=9 3'pad=9 strand=+ repeatMasking=none	0.082765
hg19_snp150Common_rs6748737 range=chr2:151132457-151132475 5'pad=9 3'pad=9 strand=+ repeatMasking=none	0.358355
hg19_snp150Common_rs698797 range=chr2:44689896-44689914 5'pad=9 3'pad=9 strand=- repeatMasking=none	-3.00743
hg19_snp150Common_rs72623118 range=chr2:161102123-161102141 5'pad=9 3'pad=9 strand=+ repeatMasking=none	-0.520216
hg19_snp150Common_rs72793440 range=chr2:53152219-53152237 5'pad=9 3'pad=9 strand=+ repeatMasking=none	-4.87897
hg19_snp150Common_rs72866958 range=chr2:43312109-43312127 5'pad=9 3'pad=9 strand=+ repeatMasking=none	-2.56159
hg19_snp150Common_rs72905868 range=chr2:38786572-38786590 5'pad=9 3'pad=9 strand=+ repeatMasking=none	-2.57248
hg19_snp150Common_rs73096687 range=chr2:228942026-228942044 5'pad=9 3'pad=9 strand=+ repeatMasking=none	-1.03341
hg19_snp150Common_rs73133909 range=chr2:4560300-4560318 5'pad=9 3'pad=9 strand=+ repeatMasking=none	0.490591
hg19_snp150Common_rs73928006 range=chr2:37544800-37544818 5'pad=9 3'pad=9 strand=+ repeatMasking=none	-3.18389
hg19_snp150Common_rs74915654 range=chr2:213323162-213323180 5'pad=9 3'pad=9 strand=+ repeatMasking=none	1.77528
hg19_snp150Common_rs75189447 range=chr2:148505683-148505701 5'pad=9 3'pad=9 strand=+ repeatMasking=none	0.802593
hg19_snp150Common_rs7557986 range=chr2:168682490-168682508 5'pad=9 3'pad=9 strand=+ repeatMasking=none	-0.479442
hg19_snp150Common_rs7559906 range=chr2:56133031-56133049 5'pad=9 3'pad=9 strand=+ repeatMasking=none	0.580668
hg19_snp150Common_rs7563865 range=chr2:151835785-151835803 5'pad=9 3'pad=9 strand=+ repeatMasking=none	0.196033
hg19_snp150Common_rs7582144 range=chr2:116423215-116423233 5'pad=9 3'pad=9 strand=+ repeatMasking=none	-1.83222
hg19_snp150Common_rs7597542 range=chr2:173267604-173267622 5'pad=9 3'pad=9 strand=+ repeatMasking=none	-2.48992
hg19_snp150Common_rs76007088 range=chr2:221256372-221256390 5'pad=9 3'pad=9 strand=+ repeatMasking=none	-1.28378
hg19_snp150Common_rs7606244 range=chr2:222151083-222151101 5'pad=9 3'pad=9 strand=+ repeatMasking=none	0.892719
hg19_snp150Common_rs76220816 range=chr2:103309226-103309244 5'pad=9 3'pad=9 strand=+ repeatMasking=none	0.158477
hg19_snp150Common_rs76416550 range=chr2:78915509-78915527 5'pad=9 3'pad=9 strand=+ repeatMasking=none	0.71853
hg19_snp150Common_rs77095883 range=chr2:9248043-9248061 5'pad=9 3'pad=9 strand=+ repeatMasking=none	0.236388
hg19_snp150Common_rs77427683 range=chr2:1089919-1089937 5'pad=9 3'pad=9 strand=+ repeatMasking=none	-1.19291
hg19_snp150Common_rs77445027 range=chr2:15952415-15952433 5'pad=9 3'pad=9 strand=+ repeatMasking=none	-1.96684
hg19_snp150Common_rs77458866 range=chr2:64880288-64880306 5'pad=9 3'pad=9 strand=+ repeatMasking=none	1.8071
hg19_snp150Common_rs77568773 range=chr2:70552993-70553011 5'pad=9 3'pad=9 strand=+ repeatMasking=none	-3.57728
hg19_snp150Common_rs77573519 range=chr2:38089020-38089038 5'pad=9 3'pad=9 strand=+ repeatMasking=none	-3.9213
hg19_snp150Common_rs77698547 range=chr2:215021552-215021570 5'pad=9 3'pad=9 strand=+ repeatMasking=none	-1.61503
hg19_snp150Common_rs77720645 range=chr2:127838670-127838688 5'pad=9 3'pad=9 strand=+ repeatMasking=none	-1.09525
hg19_snp150Common_rs78435399 range=chr2:182244072-182244090 5'pad=9 3'pad=9 strand=+ repeatMasking=none	1.37433
hg19_snp150Common_rs78661919 range=chr2:198691146-198691164 5'pad=9 3'pad=9 strand=+ repeatMasking=none	2.68922
hg19_snp150Common_rs843211 range=chr2:156466994-156467012 5'pad=9 3'pad=9 strand=+ repeatMasking=none	-3.01718
hg19_snp150Common_rs875565 range=chr2:102438827-102438845 5'pad=9 3'pad=9 strand=+ repeatMasking=none	0.808102
hg19_snp150Common_rs9941593 range=chr2:203992196-203992214 5'pad=9 3'pad=9 strand=+ repeatMasking=none	3.75677
hg19_snp150Common_rs10511307 range=chr3:111859725-111859743 5'pad=9 3'pad=9 strand=+ repeatMasking=none	-0.872175
hg19_snp150Common_rs111678555 range=chr3:60263242-60263260 5'pad=9 3'pad=9 strand=+ repeatMasking=none	2.5447
hg19_snp150Common_rs113488782 range=chr3:195684112-195684130 5'pad=9 3'pad=9 strand=+ repeatMasking=none	-0.09812
hg19_snp150Common_rs113780686 range=chr3:194644606-194644624 5'pad=9 3'pad=9 strand=+ repeatMasking=none	-1.75394
hg19_snp150Common_rs114685031 range=chr3:149002727-149002745 5'pad=9 3'pad=9 strand=+ repeatMasking=none	1.48338
hg19_snp150Common_rs114761131 range=chr3:99005705-99005723 5'pad=9 3'pad=9 strand=+ repeatMasking=none	0.195732
hg19_snp150Common_rs115995845 range=chr3:128994501-128994519 5'pad=9 3'pad=9 strand=+ repeatMasking=none	0.855907
hg19_snp150Common_rs116740811 range=chr3:76718616-76718634 5'pad=9 3'pad=9 strand=+ repeatMasking=none	2.65662
hg19_snp150Common_rs11718104 range=chr3:36645797-36645815 5'pad=9 3'pad=9 strand=+ repeatMasking=none	1.79757
hg19_snp150Common_rs11718904 range=chr3:109569857-109569875 5'pad=9 3'pad=9 strand=+ repeatMasking=none	3.04869
hg19_snp150Common_rs118119875 range=chr3:137262662-137262680 5'pad=9 3'pad=9 strand=+ repeatMasking=none	2.3087
hg19_snp150Common_rs11921532 range=chr3:161766227-161766245 5'pad=9 3'pad=9 strand=+ repeatMasking=none	3.92669
hg19_snp150Common_rs11929649 range=chr3:76507796-76507814 5'pad=9 3'pad=9 strand=+ repeatMasking=none	0.173141
hg19_snp150Common_rs12386340 range=chr3:88496509-88496527 5'pad=9 3'pad=9 strand=+ repeatMasking=none	3.20099
hg19_snp150Common_rs12485874 range=chr3:117661756-117661774 5'pad=9 3'pad=9 strand=+ repeatMasking=none	0.302511
hg19_snp150Common_rs12490520 range=chr3:69720969-69720987 5'pad=9 3'pad=9 strand=+ repeatMasking=none	1.14385
hg19_snp150Common_rs12721331 range=chr3:148444984-148445002 5'pad=9 3'pad=9 strand=+ repeatMasking=none	1.34235
hg19_snp150Common_rs13067519 range=chr3:141336296-141336314 5'pad=9 3'pad=9 strand=+ repeatMasking=none	1.57492
hg19_snp150Common_rs13085937 range=chr3:182178207-182178225 5'pad=9 3'pad=9 strand=+ repeatMasking=none	1.00086
hg19_snp150Common_rs13088180 range=chr3:145812186-145812204 5'pad=9 3'pad=9 strand=+ repeatMasking=none	1.19458
hg19_snp150Common_rs13098686 range=chr3:5661988-5662006 5'pad=9 3'pad=9 strand=+ repeatMasking=none	-0.712814
hg19_snp150Common_rs13318260 range=chr3:125151473-125151491 5'pad=9 3'pad=9 strand=+ repeatMasking=none	2.62882
hg19_snp150Common_rs1379524 range=chr3:29652477-29652495 5'pad=9 3'pad=9 strand=- repeatMasking=none	0.196826
hg19_snp150Common_rs150183318 range=chr3:136706567-136706585 5'pad=9 3'pad=9 strand=+ repeatMasking=none	-3.32131
hg19_snp150Common_rs16854775 range=chr3:108442762-108442780 5'pad=9 3'pad=9 strand=+ repeatMasking=none	2.81869
hg19_snp150Common_rs17046324 range=chr3:6952919-6952937 5'pad=9 3'pad=9 strand=+ repeatMasking=none	-1.95497
hg19_snp150Common_rs184987726 range=chr3:67092474-67092492 5'pad=9 3'pad=9 strand=+ repeatMasking=none	-0.81793
hg19_snp150Common_rs190403821 range=chr3:192714316-192714334 5'pad=9 3'pad=9 strand=+ repeatMasking=none	-1.00377
hg19_snp150Common_rs2061064 range=chr3:171381625-171381643 5'pad=9 3'pad=9 strand=+ repeatMasking=none	-1.71914
hg19_snp150Common_rs2399218 range=chr3:107676324-107676342 5'pad=9 3'pad=9 strand=+ repeatMasking=none	-0.178178
hg19_snp150Common_rs2578705 range=chr3:75740173-75740191 5'pad=9 3'pad=9 strand=+ repeatMasking=none	-0.444838
hg19_snp150Common_rs2742434 range=chr3:45740771-45740789 5'pad=9 3'pad=9 strand=+ repeatMasking=none	0.081468
hg19_snp150Common_rs28409971 range=chr3:66479980-66479998 5'pad=9 3'pad=9 strand=+ repeatMasking=none	-0.867679
hg19_snp150Common_rs35484794 range=chr3:37476923-37476941 5'pad=9 3'pad=9 strand=+ repeatMasking=none	-0.021844
hg19_snp150Common_rs4513450 range=chr3:167055034-167055052 5'pad=9 3'pad=9 strand=+ repeatMasking=none	-4.79802
hg19_snp150Common_rs4681148 range=chr3:148005244-148005262 5'pad=9 3'pad=9 strand=+ repeatMasking=none	-2.29759
hg19_snp150Common_rs480913 range=chr3:159729571-159729589 5'pad=9 3'pad=9 strand=+ repeatMasking=none	2.77187
hg19_snp150Common_rs5005929 range=chr3:633002-633020 5'pad=9 3'pad=9 strand=+ repeatMasking=none	-1.964
hg19_snp150Common_rs59534618 range=chr3:14763096-14763114 5'pad=9 3'pad=9 strand=+ repeatMasking=none	9.01376
hg19_snp150Common_rs60494162 range=chr3:51879413-51879431 5'pad=9 3'pad=9 strand=+ repeatMasking=none	0.138806
hg19_snp150Common_rs61102363 range=chr3:43539284-43539302 5'pad=9 3'pad=9 strand=+ repeatMasking=none	0.68243
hg19_snp150Common_rs62271620 range=chr3:110240505-110240523 5'pad=9 3'pad=9 strand=+ repeatMasking=none	-0.943803
hg19_snp150Common_rs6443202 range=chr3:8753209-8753227 5'pad=9 3'pad=9 strand=+ repeatMasking=none	-0.240342
hg19_snp150Common_rs6764916 range=chr3:139027701-139027719 5'pad=9 3'pad=9 strand=+ repeatMasking=none	2.94054
hg19_snp150Common_rs6776721 range=chr3:60489361-60489379 5'pad=9 3'pad=9 strand=+ repeatMasking=none	-3.45552
hg19_snp150Common_rs6789735 range=chr3:23866498-23866516 5'pad=9 3'pad=9 strand=+ repeatMasking=none	1.08855
hg19_snp150Common_rs6796233 range=chr3:10662911-10662929 5'pad=9 3'pad=9 strand=+ repeatMasking=none	-1.40755
hg19_snp150Common_rs6804938 range=chr3:141615039-141615057 5'pad=9 3'pad=9 strand=+ repeatMasking=none	4.21873
hg19_snp150Common_rs72879158 range=chr3:55940068-55940086 5'pad=9 3'pad=9 strand=+ repeatMasking=none	4.10361
hg19_snp150Common_rs72963418 range=chr3:117320884-117320902 5'pad=9 3'pad=9 strand=+ repeatMasking=none	1.8147
hg19_snp150Common_rs72988839 range=chr3:129190194-129190212 5'pad=9 3'pad=9 strand=+ repeatMasking=none	-1.86762
hg19_snp150Common_rs73005902 range=chr3:6004856-6004874 5'pad=9 3'pad=9 strand=+ repeatMasking=none	-2.35434
hg19_snp150Common_rs73052886 range=chr3:185077667-185077685 5'pad=9 3'pad=9 strand=+ repeatMasking=none	-1.25893
hg19_snp150Common_rs73108822 range=chr3:74862967-74862985 5'pad=9 3'pad=9 strand=+ repeatMasking=none	0.57979
hg19_snp150Common_rs73130865 range=chr3:84782539-84782557 5'pad=9 3'pad=9 strand=+ repeatMasking=none	-1.08274
hg19_snp150Common_rs74770772 range=chr3:33793334-33793352 5'pad=9 3'pad=9 strand=+ repeatMasking=none	2.40082
hg19_snp150Common_rs75445620 range=chr3:73577488-73577506 5'pad=9 3'pad=9 strand=+ repeatMasking=none	1.24319
hg19_snp150Common_rs75916225 range=chr3:9862916-9862934 5'pad=9 3'pad=9 strand=+ repeatMasking=none	-0.439498
hg19_snp150Common_rs76171771 range=chr3:66727036-66727054 5'pad=9 3'pad=9 strand=+ repeatMasking=none	0.465868
hg19_snp150Common_rs76227691 range=chr3:69712692-69712710 5'pad=9 3'pad=9 strand=+ repeatMasking=none	-0.71405
hg19_snp150Common_rs76411878 range=chr3:143629069-143629087 5'pad=9 3'pad=9 strand=+ repeatMasking=none	-1.16041
hg19_snp150Common_rs7645681 range=chr3:143568145-143568163 5'pad=9 3'pad=9 strand=+ repeatMasking=none	-1.7433
hg19_snp150Common_rs76480878 range=chr3:63587763-63587781 5'pad=9 3'pad=9 strand=+ repeatMasking=none	0.163846
hg19_snp150Common_rs7651804 range=chr3:140336226-140336244 5'pad=9 3'pad=9 strand=+ repeatMasking=none	4.05623
hg19_snp150Common_rs76545149 range=chr3:89472261-89472279 5'pad=9 3'pad=9 strand=+ repeatMasking=none	-0.092378
hg19_snp150Common_rs76548180 range=chr3:184828475-184828493 5'pad=9 3'pad=9 strand=+ repeatMasking=none	-2.55045
hg19_snp150Common_rs76828209 range=chr3:189145861-189145879 5'pad=9 3'pad=9 strand=+ repeatMasking=none	0.710552
hg19_snp150Common_rs76993935 range=chr3:61441382-61441400 5'pad=9 3'pad=9 strand=+ repeatMasking=none	-0.598504
hg19_snp150Common_rs77144366 range=chr3:26721007-26721025 5'pad=9 3'pad=9 strand=+ repeatMasking=none	1.72603
hg19_snp150Common_rs78757248 range=chr3:174757306-174757324 5'pad=9 3'pad=9 strand=+ repeatMasking=none	1.3849
hg19_snp150Common_rs79564124 range=chr3:75756301-75756319 5'pad=9 3'pad=9 strand=+ repeatMasking=none	-0.69296
hg19_snp150Common_rs80161549 range=chr3:66510620-66510638 5'pad=9 3'pad=9 strand=+ repeatMasking=none	-1.53049
hg19_snp150Common_rs8649 range=chr3:133486949-133486967 5'pad=9 3'pad=9 strand=+ repeatMasking=none	-5.73016
hg19_snp150Common_rs974217 range=chr3:126875078-126875096 5'pad=9 3'pad=9 strand=- repeatMasking=none	1.24251
hg19_snp150Common_rs9830040 range=chr3:167482779-167482797 5'pad=9 3'pad=9 strand=+ repeatMasking=none	-0.355648
hg19_snp150Common_rs9840684 range=chr3:48893771-48893789 5'pad=9 3'pad=9 strand=+ repeatMasking=none	-1.18051
hg19_snp150Common_rs9868115 range=chr3:69508213-69508231 5'pad=9 3'pad=9 strand=+ repeatMasking=none	-0.034032
hg19_snp150Common_rs9869127 range=chr3:62597454-62597472 5'pad=9 3'pad=9 strand=+ repeatMasking=none	-4.34799
hg19_snp150Common_rs10003913 range=chr4:106442599-106442617 5'pad=9 3'pad=9 strand=+ repeatMasking=none	2.79883
hg19_snp150Common_rs10014197 range=chr4:160107909-160107927 5'pad=9 3'pad=9 strand=+ repeatMasking=none	-1.78087
hg19_snp150Common_rs10022991 range=chr4:142076299-142076317 5'pad=9 3'pad=9 strand=+ repeatMasking=none	1.041
hg19_snp150Common_rs10856980 range=chr4:107631670-107631688 5'pad=9 3'pad=9 strand=+ repeatMasking=none	1.49189
hg19_snp150Common_rs1105951 range=chr4:160561108-160561126 5'pad=9 3'pad=9 strand=+ repeatMasking=none	0.211671
hg19_snp150Common_rs111375366 range=chr4:40179662-40179680 5'pad=9 3'pad=9 strand=+ repeatMasking=none	2.30776
hg19_snp150Common_rs112106154 range=chr4:3625971-3625989 5'pad=9 3'pad=9 strand=+ repeatMasking=none	-0.081576
hg19_snp150Common_rs113252642 range=chr4:125871838-125871856 5'pad=9 3'pad=9 strand=+ repeatMasking=none	2.37504
hg19_snp150Common_rs114541180 range=chr4:183709508-183709526 5'pad=9 3'pad=9 strand=+ repeatMasking=none	-0.019146
hg19_snp150Common_rs115014005 range=chr4:141376049-141376067 5'pad=9 3'pad=9 strand=+ repeatMasking=none	-1.69917
hg19_snp150Common_rs115393577 range=chr4:176443564-176443582 5'pad=9 3'pad=9 strand=+ repeatMasking=none	-1.00497
hg19_snp150Common_rs115915696 range=chr4:153905508-153905526 5'pad=9 3'pad=9 strand=+ repeatMasking=none	-2.43109
hg19_snp150Common_rs116669267 range=chr4:16603967-16603985 5'pad=9 3'pad=9 strand=+ repeatMasking=none	-1.11544
hg19_snp150Common_rs116737268 range=chr4:147364755-147364773 5'pad=9 3'pad=9 strand=+ repeatMasking=none	2.46918
hg19_snp150Common_rs117103099 range=chr4:12097975-12097993 5'pad=9 3'pad=9 strand=+ repeatMasking=none	1.46028
hg19_snp150Common_rs11733613 range=chr4:186723226-186723244 5'pad=9 3'pad=9 strand=+ repeatMasking=none	0.747392
hg19_snp150Common_rs11937484 range=chr4:96273873-96273891 5'pad=9 3'pad=9 strand=+ repeatMasking=none	-3.15645
hg19_snp150Common_rs12498143 range=chr4:66847664-66847682 5'pad=9 3'pad=9 strand=+ repeatMasking=none	-1.6989
hg19_snp150Common_rs12504939 range=chr4:19549928-19549946 5'pad=9 3'pad=9 strand=+ repeatMasking=none	0.570479
hg19_snp150Common_rs12505459 range=chr4:30586438-30586456 5'pad=9 3'pad=9 strand=+ repeatMasking=none	1.53377
hg19_snp150Common_rs12641141 range=chr4:26913182-26913200 5'pad=9 3'pad=9 strand=+ repeatMasking=none	2.27418
hg19_snp150Common_rs12646520 range=chr4:183498866-183498884 5'pad=9 3'pad=9 strand=+ repeatMasking=none	1.08745
hg19_snp150Common_rs13109062 range=chr4:93974170-93974188 5'pad=9 3'pad=9 strand=+ repeatMasking=none	-0.637847
hg19_snp150Common_rs13127661 range=chr4:133538696-133538714 5'pad=9 3'pad=9 strand=+ repeatMasking=none	0.361569
hg19_snp150Common_rs142066527 range=chr4:54591724-54591742 5'pad=9 3'pad=9 strand=+ repeatMasking=none	2.01542
hg19_snp150Common_rs145179175 range=chr4:141503018-141503036 5'pad=9 3'pad=9 strand=+ repeatMasking=none	-0.544886
hg19_snp150Common_rs1504869 range=chr4:136527362-136527380 5'pad=9 3'pad=9 strand=- repeatMasking=none	-0.105837
hg19_snp150Common_rs150835725 range=chr4:9068476-9068494 5'pad=9 3'pad=9 strand=+ repeatMasking=none	0.126596
hg19_snp150Common_rs1597358 range=chr4:27583159-27583177 5'pad=9 3'pad=9 strand=- repeatMasking=none	2.23674
hg19_snp150Common_rs16885875 range=chr4:11681114-11681132 5'pad=9 3'pad=9 strand=+ repeatMasking=none	-0.322367
hg19_snp150Common_rs17007615 range=chr4:84793333-84793351 5'pad=9 3'pad=9 strand=+ repeatMasking=none	0.247632
hg19_snp150Common_rs17610283 range=chr4:164340357-164340375 5'pad=9 3'pad=9 strand=+ repeatMasking=none	0.717663
hg19_snp150Common_rs185901379 range=chr4:132875035-132875053 5'pad=9 3'pad=9 strand=+ repeatMasking=none	1.3862
hg19_snp150Common_rs201040359 range=chr4:62310766-62310784 5'pad=9 3'pad=9 strand=+ repeatMasking=none	-2.37652
hg19_snp150Common_rs202201397 range=chr4:178442415-178442433 5'pad=9 3'pad=9 strand=+ repeatMasking=none	0.642021
hg19_snp150Common_rs2176446 range=chr4:16079671-16079689 5'pad=9 3'pad=9 strand=+ repeatMasking=none	-5.73131
hg19_snp150Common_rs2315270 range=chr4:17460366-17460384 5'pad=9 3'pad=9 strand=+ repeatMasking=none	-0.571031
hg19_snp150Common_rs2348253 range=chr4:64997459-64997477 5'pad=9 3'pad=9 strand=+ repeatMasking=none	-0.068182
hg19_snp150Common_rs2637808 range=chr4:70834599-70834617 5'pad=9 3'pad=9 strand=- repeatMasking=none	-0.348427
hg19_snp150Common_rs2642842 range=chr4:70283071-70283089 5'pad=9 3'pad=9 strand=- repeatMasking=none	0.052912
hg19_snp150Common_rs2739539 range=chr4:190713983-190714001 5'pad=9 3'pad=9 strand=+ repeatMasking=none	4.27162
hg19_snp150Common_rs28575139 range=chr4:179066909-179066927 5'pad=9 3'pad=9 strand=+ repeatMasking=none	0.320187
hg19_snp150Common_rs28620582 range=chr4:34404024-34404042 5'pad=9 3'pad=9 strand=+ repeatMasking=none	-2.55653
hg19_snp150Common_rs2884219 range=chr4:148037140-148037158 5'pad=9 3'pad=9 strand=+ repeatMasking=none	1.0579
hg19_snp150Common_rs2911893 range=chr4:37794769-37794787 5'pad=9 3'pad=9 strand=- repeatMasking=none	-0.785322
hg19_snp150Common_rs3113806 range=chr4:66903239-66903257 5'pad=9 3'pad=9 strand=+ repeatMasking=none	-0.666019
hg19_snp150Common_rs3128776 range=chr4:2403972-2403990 5'pad=9 3'pad=9 strand=- repeatMasking=none	-1.4789
hg19_snp150Common_rs343185 range=chr4:121742138-121742156 5'pad=9 3'pad=9 strand=- repeatMasking=none	1.74755
hg19_snp150Common_rs34515368 range=chr4:35746168-35746186 5'pad=9 3'pad=9 strand=+ repeatMasking=none	1.62452
hg19_snp150Common_rs35963898 range=chr4:188891667-188891685 5'pad=9 3'pad=9 strand=+ repeatMasking=none	-3.30588
hg19_snp150Common_rs369667 range=chr4:60012308-60012326 5'pad=9 3'pad=9 strand=- repeatMasking=none	-7.26987
hg19_snp150Common_rs4276331 range=chr4:138556534-138556552 5'pad=9 3'pad=9 strand=- repeatMasking=none	0.082863
hg19_snp150Common_rs4365774 range=chr4:138525429-138525447 5'pad=9 3'pad=9 strand=- repeatMasking=none	-0.916071
hg19_snp150Common_rs443788 range=chr4:189311813-189311831 5'pad=9 3'pad=9 strand=- repeatMasking=none	1.10147
hg19_snp150Common_rs527507727 range=chr4:29821846-29821864 5'pad=9 3'pad=9 strand=+ repeatMasking=none	-1.36535
hg19_snp150Common_rs538149547 range=chr4:159306850-159306868 5'pad=9 3'pad=9 strand=+ repeatMasking=none	-1.15775
hg19_snp150Common_rs567417719 range=chr4:644865-644883 5'pad=9 3'pad=9 strand=+ repeatMasking=none	0.122326
hg19_snp150Common_rs58491357 range=chr4:140873748-140873766 5'pad=9 3'pad=9 strand=+ repeatMasking=none	6.20431
hg19_snp150Common_rs62331966 range=chr4:168232122-168232140 5'pad=9 3'pad=9 strand=+ repeatMasking=none	1.79712
hg19_snp150Common_rs62350936 range=chr4:159269928-159269946 5'pad=9 3'pad=9 strand=+ repeatMasking=none	3.37914
hg19_snp150Common_rs62353203 range=chr4:167746640-167746658 5'pad=9 3'pad=9 strand=+ repeatMasking=none	-0.34987
hg19_snp150Common_rs6534950 range=chr4:134151664-134151682 5'pad=9 3'pad=9 strand=+ repeatMasking=none	-0.257379
hg19_snp150Common_rs6551747 range=chr4:63998552-63998570 5'pad=9 3'pad=9 strand=+ repeatMasking=none	-1.98057
hg19_snp150Common_rs6813305 range=chr4:6456862-6456880 5'pad=9 3'pad=9 strand=+ repeatMasking=none	4.46113
hg19_snp150Common_rs6822480 range=chr4:29632222-29632240 5'pad=9 3'pad=9 strand=+ repeatMasking=none	5.3021
hg19_snp150Common_rs6830875 range=chr4:41429224-41429242 5'pad=9 3'pad=9 strand=+ repeatMasking=none	1.75643
hg19_snp150Common_rs6831345 range=chr4:77111746-77111764 5'pad=9 3'pad=9 strand=+ repeatMasking=none	0.258197
hg19_snp150Common_rs6840524 range=chr4:182295757-182295775 5'pad=9 3'pad=9 strand=+ repeatMasking=none	-1.32774
hg19_snp150Common_rs6852597 range=chr4:65937831-65937849 5'pad=9 3'pad=9 strand=+ repeatMasking=none	-1.31843
hg19_snp150Common_rs73181384 range=chr4:58797917-58797935 5'pad=9 3'pad=9 strand=+ repeatMasking=none	-0.119625
hg19_snp150Common_rs73235975 range=chr4:16301455-16301473 5'pad=9 3'pad=9 strand=+ repeatMasking=none	-5.78971
hg19_snp150Common_rs7377402 range=chr4:165466966-165466984 5'pad=9 3'pad=9 strand=+ repeatMasking=none	1.26449
hg19_snp150Common_rs73822343 range=chr4:65845573-65845591 5'pad=9 3'pad=9 strand=+ repeatMasking=none	1.70474
hg19_snp150Common_rs74631964 range=chr4:86789358-86789376 5'pad=9 3'pad=9 strand=+ repeatMasking=none	-0.120542
hg19_snp150Common_rs75129824 range=chr4:130850178-130850196 5'pad=9 3'pad=9 strand=+ repeatMasking=none	-1.22274
hg19_snp150Common_rs75913181 range=chr4:11051603-11051621 5'pad=9 3'pad=9 strand=+ repeatMasking=none	-2.70471
hg19_snp150Common_rs76220180 range=chr4:30560720-30560738 5'pad=9 3'pad=9 strand=+ repeatMasking=none	0.811094
hg19_snp150Common_rs7659831 range=chr4:110642779-110642797 5'pad=9 3'pad=9 strand=+ repeatMasking=none	-8.44886
hg19_snp150Common_rs7661880 range=chr4:45850655-45850673 5'pad=9 3'pad=9 strand=+ repeatMasking=none	-2.91044
hg19_snp150Common_rs7662706 range=chr4:127819240-127819258 5'pad=9 3'pad=9 strand=+ repeatMasking=none	-1.60747
hg19_snp150Common_rs7668359 range=chr4:5515447-5515465 5'pad=9 3'pad=9 strand=+ repeatMasking=none	-3.62509
hg19_snp150Common_rs76792283 range=chr4:159374819-159374837 5'pad=9 3'pad=9 strand=+ repeatMasking=none	1.22834
hg19_snp150Common_rs7690500 range=chr4:10861983-10862001 5'pad=9 3'pad=9 strand=+ repeatMasking=none	-1.86219
hg19_snp150Common_rs7692480 range=chr4:48675346-48675364 5'pad=9 3'pad=9 strand=+ repeatMasking=none	1.15021
hg19_snp150Common_rs78704807 range=chr4:9615281-9615299 5'pad=9 3'pad=9 strand=+ repeatMasking=none	1.78289
hg19_snp150Common_rs78760038 range=chr4:126507657-126507675 5'pad=9 3'pad=9 strand=+ repeatMasking=none	-1.28788
hg19_snp150Common_rs79670853 range=chr4:190529096-190529114 5'pad=9 3'pad=9 strand=+ repeatMasking=none	0
hg19_snp150Common_rs79706059 range=chr4:189508503-189508521 5'pad=9 3'pad=9 strand=+ repeatMasking=none	2.19348
hg19_snp150Common_rs878934839 range=chr4:142909854-142909873 5'pad=9 3'pad=9 strand=+ repeatMasking=none	0
hg19_snp150Common_rs9637604 range=chr4:120879067-120879085 5'pad=9 3'pad=9 strand=+ repeatMasking=none	0.886533
hg19_snp150Common_rs9790738 range=chr4:171044012-171044030 5'pad=9 3'pad=9 strand=+ repeatMasking=none	-1.69942
hg19_snp150Common_rs10079515 range=chr5:148789254-148789272 5'pad=9 3'pad=9 strand=+ repeatMasking=none	-0.839712
hg19_snp150Common_rs10476007 range=chr5:171546854-171546872 5'pad=9 3'pad=9 strand=+ repeatMasking=none	3.60961
hg19_snp150Common_rs10514875 range=chr5:58027474-58027492 5'pad=9 3'pad=9 strand=- repeatMasking=none	4.4861
hg19_snp150Common_rs10941592 range=chr5:42831505-42831523 5'pad=9 3'pad=9 strand=+ repeatMasking=none	2.50235
hg19_snp150Common_rs111758403 range=chr5:123832415-123832433 5'pad=9 3'pad=9 strand=+ repeatMasking=none	-3.38401
hg19_snp150Common_rs111857960 range=chr5:21663161-21663179 5'pad=9 3'pad=9 strand=+ repeatMasking=none	2.17996
hg19_snp150Common_rs113321597 range=chr5:160495213-160495231 5'pad=9 3'pad=9 strand=+ repeatMasking=none	2.17775
hg19_snp150Common_rs113583670 range=chr5:46006123-46006141 5'pad=9 3'pad=9 strand=+ repeatMasking=none	1.33536
hg19_snp150Common_rs115098800 range=chr5:107746918-107746936 5'pad=9 3'pad=9 strand=+ repeatMasking=none	-1.2588
hg19_snp150Common_rs116037957 range=chr5:4532646-4532664 5'pad=9 3'pad=9 strand=+ repeatMasking=none	1.78035
hg19_snp150Common_rs116154772 range=chr5:88539774-88539792 5'pad=9 3'pad=9 strand=+ repeatMasking=none	3.52782
hg19_snp150Common_rs116475897 range=chr5:154461467-154461485 5'pad=9 3'pad=9 strand=+ repeatMasking=none	-0.490222
hg19_snp150Common_rs117015730 range=chr5:88341258-88341276 5'pad=9 3'pad=9 strand=+ repeatMasking=none	-3.09862
hg19_snp150Common_rs11748013 range=chr5:84021227-84021245 5'pad=9 3'pad=9 strand=+ repeatMasking=none	-1.67958
hg19_snp150Common_rs11950360 range=chr5:180248663-180248681 5'pad=9 3'pad=9 strand=+ repeatMasking=none	-1.35003
hg19_snp150Common_rs11960574 range=chr5:114970896-114970914 5'pad=9 3'pad=9 strand=+ repeatMasking=none	-0.86912
hg19_snp150Common_rs12653243 range=chr5:27686881-27686899 5'pad=9 3'pad=9 strand=+ repeatMasking=none	-0.240209
hg19_snp150Common_rs12657418 range=chr5:68546537-68546555 5'pad=9 3'pad=9 strand=+ repeatMasking=none	0.848061
hg19_snp150Common_rs142573435 range=chr5:113500653-113500671 5'pad=9 3'pad=9 strand=+ repeatMasking=none	-1.86421
hg19_snp150Common_rs142831750 range=chr5:167155511-167155529 5'pad=9 3'pad=9 strand=+ repeatMasking=none	-2.27615
hg19_snp150Common_rs144827021 range=chr5:170525340-170525358 5'pad=9 3'pad=9 strand=+ repeatMasking=none	2.60112
hg19_snp150Common_rs145035915 range=chr5:21751722-21751740 5'pad=9 3'pad=9 strand=+ repeatMasking=none	0.120914
hg19_snp150Common_rs147116749 range=chr5:95595697-95595715 5'pad=9 3'pad=9 strand=+ repeatMasking=none	-1.20851
hg19_snp150Common_rs1501775 range=chr5:10950727-10950745 5'pad=9 3'pad=9 strand=+ repeatMasking=none	-1.338
hg19_snp150Common_rs1527374 range=chr5:18459968-18459986 5'pad=9 3'pad=9 strand=- repeatMasking=none	2.01614
hg19_snp150Common_rs1531266 range=chr5:162440184-162440202 5'pad=9 3'pad=9 strand=- repeatMasking=none	-1.37798
hg19_snp150Common_rs1594674 range=chr5:144972985-144973003 5'pad=9 3'pad=9 strand=+ repeatMasking=none	-1.12232
hg19_snp150Common_rs1604086 range=chr5:85146256-85146274 5'pad=9 3'pad=9 strand=- repeatMasking=none	2.05328
hg19_snp150Common_rs16894300 range=chr5:25317972-25317990 5'pad=9 3'pad=9 strand=+ repeatMasking=none	0.749116
hg19_snp150Common_rs17057736 range=chr5:159794801-159794819 5'pad=9 3'pad=9 strand=+ repeatMasking=none	-0.11712
hg19_snp150Common_rs17169671 range=chr5:135347194-135347212 5'pad=9 3'pad=9 strand=+ repeatMasking=none	0.160009
hg19_snp150Common_rs17253223 range=chr5:13019887-13019905 5'pad=9 3'pad=9 strand=+ repeatMasking=none	-0.35579
hg19_snp150Common_rs17436107 range=chr5:107228651-107228669 5'pad=9 3'pad=9 strand=+ repeatMasking=none	1.55023
hg19_snp150Common_rs17566680 range=chr5:75586927-75586945 5'pad=9 3'pad=9 strand=+ repeatMasking=none	-1.70069
hg19_snp150Common_rs17626893 range=chr5:17430527-17430545 5'pad=9 3'pad=9 strand=+ repeatMasking=none	3.60141
hg19_snp150Common_rs17650267 range=chr5:141963748-141963766 5'pad=9 3'pad=9 strand=+ repeatMasking=none	-0.174584
hg19_snp150Common_rs1805957 range=chr5:9234727-9234745 5'pad=9 3'pad=9 strand=- repeatMasking=none	0.111896
hg19_snp150Common_rs1806015 range=chr5:9233473-9233491 5'pad=9 3'pad=9 strand=- repeatMasking=none	2.0785
hg19_snp150Common_rs182672417 range=chr5:173593670-173593688 5'pad=9 3'pad=9 strand=+ repeatMasking=none	-3.33621
hg19_snp150Common_rs1833886 range=chr5:52762880-52762898 5'pad=9 3'pad=9 strand=+ repeatMasking=none	0.778634
hg19_snp150Common_rs185321 range=chr5:151426507-151426525 5'pad=9 3'pad=9 strand=+ repeatMasking=none	0.811747
hg19_snp150Common_rs1910788 range=chr5:118531383-118531401 5'pad=9 3'pad=9 strand=- repeatMasking=none	-1.85784
hg19_snp150Common_rs1990874 range=chr5:128895276-128895294 5'pad=9 3'pad=9 strand=+ repeatMasking=none	-1.38576
hg19_snp150Common_rs201445749 range=chr5:127456243-127456261 5'pad=9 3'pad=9 strand=+ repeatMasking=none	-2.71406
hg19_snp150Common_rs224913 range=chr5:81654104-81654122 5'pad=9 3'pad=9 strand=- repeatMasking=none	-0.895894
hg19_snp150Common_rs2421778 range=chr5:159723349-159723367 5'pad=9 3'pad=9 strand=+ repeatMasking=none	-1.86282
hg19_snp150Common_rs249907 range=chr5:146150848-146150866 5'pad=9 3'pad=9 strand=- repeatMasking=none	-2.56081
hg19_snp150Common_rs2560072 range=chr5:153296419-153296437 5'pad=9 3'pad=9 strand=+ repeatMasking=none	2.2446
hg19_snp150Common_rs28874338 range=chr5:145951789-145951807 5'pad=9 3'pad=9 strand=+ repeatMasking=none	-1.96647
hg19_snp150Common_rs2972980 range=chr5:96879197-96879215 5'pad=9 3'pad=9 strand=- repeatMasking=none	3.24059
hg19_snp150Common_rs30984 range=chr5:146575927-146575945 5'pad=9 3'pad=9 strand=- repeatMasking=none	5.51541
hg19_snp150Common_rs3212433 range=chr5:52337135-52337153 5'pad=9 3'pad=9 strand=+ repeatMasking=none	-0.126976
hg19_snp150Common_rs34565875 range=chr5:113819023-113819041 5'pad=9 3'pad=9 strand=+ repeatMasking=none	-2.38183
hg19_snp150Common_rs35981781 range=chr5:55888878-55888896 5'pad=9 3'pad=9 strand=+ repeatMasking=none	1.39492
hg19_snp150Common_rs4090574 range=chr5:125418365-125418383 5'pad=9 3'pad=9 strand=+ repeatMasking=none	2.71523
hg19_snp150Common_rs4264920 range=chr5:101223675-101223693 5'pad=9 3'pad=9 strand=+ repeatMasking=none	1.78529
hg19_snp150Common_rs4365817 range=chr5:22237991-22238009 5'pad=9 3'pad=9 strand=+ repeatMasking=none	-1.76564
hg19_snp150Common_rs4868864 range=chr5:163591826-163591844 5'pad=9 3'pad=9 strand=+ repeatMasking=none	-0.222156
hg19_snp150Common_rs4895219 range=chr5:119322534-119322552 5'pad=9 3'pad=9 strand=+ repeatMasking=none	-0.413975
hg19_snp150Common_rs543576533 range=chr5:57589276-57589294 5'pad=9 3'pad=9 strand=+ repeatMasking=none	2.05076
hg19_snp150Common_rs557184468 range=chr5:88200437-88200455 5'pad=9 3'pad=9 strand=+ repeatMasking=none	8.75126
hg19_snp150Common_rs55840719 range=chr5:44466250-44466268 5'pad=9 3'pad=9 strand=+ repeatMasking=none	-0.494401
hg19_snp150Common_rs55980520 range=chr5:156473894-156473912 5'pad=9 3'pad=9 strand=+ repeatMasking=none	0.660709
hg19_snp150Common_rs56145778 range=chr5:143467923-143467941 5'pad=9 3'pad=9 strand=+ repeatMasking=none	-0.164293
hg19_snp150Common_rs56349048 range=chr5:71121061-71121079 5'pad=9 3'pad=9 strand=+ repeatMasking=none	-0.080844
hg19_snp150Common_rs57306605 range=chr5:18905374-18905392 5'pad=9 3'pad=9 strand=+ repeatMasking=none	0.561253
hg19_snp150Common_rs5745224 range=chr5:10715530-10715548 5'pad=9 3'pad=9 strand=- repeatMasking=none	-4.33803
hg19_snp150Common_rs58153185 range=chr5:71072556-71072574 5'pad=9 3'pad=9 strand=+ repeatMasking=none	-2.98927
hg19_snp150Common_rs59062861 range=chr5:4893384-4893402 5'pad=9 3'pad=9 strand=+ repeatMasking=none	-1.14817
hg19_snp150Common_rs62345475 range=chr5:4730768-4730786 5'pad=9 3'pad=9 strand=+ repeatMasking=none	-1.78159
hg19_snp150Common_rs62356624 range=chr5:56314201-56314219 5'pad=9 3'pad=9 strand=+ repeatMasking=none	4.12053
hg19_snp150Common_rs67150159 range=chr5:33629321-33629339 5'pad=9 3'pad=9 strand=+ repeatMasking=none	-2.82564
hg19_snp150Common_rs6867761 range=chr5:135977563-135977581 5'pad=9 3'pad=9 strand=+ repeatMasking=none	0.377407
hg19_snp150Common_rs6877681 range=chr5:141314655-141314673 5'pad=9 3'pad=9 strand=+ repeatMasking=none	1.14578
hg19_snp150Common_rs6884598 range=chr5:31491248-31491266 5'pad=9 3'pad=9 strand=+ repeatMasking=none	0.018692
hg19_snp150Common_rs6890000 range=chr5:66349017-66349035 5'pad=9 3'pad=9 strand=+ repeatMasking=none	0.296063
hg19_snp150Common_rs73297178 range=chr5:155972565-155972583 5'pad=9 3'pad=9 strand=+ repeatMasking=none	1.68119
hg19_snp150Common_rs73790182 range=chr5:133476034-133476052 5'pad=9 3'pad=9 strand=+ repeatMasking=none	2.25142
hg19_snp150Common_rs74854567 range=chr5:6482694-6482712 5'pad=9 3'pad=9 strand=+ repeatMasking=none	-0.803476
hg19_snp150Common_rs74991312 range=chr5:24921861-24921879 5'pad=9 3'pad=9 strand=+ repeatMasking=none	-2.43183
hg19_snp150Common_rs75654232 range=chr5:20395786-20395804 5'pad=9 3'pad=9 strand=+ repeatMasking=none	-2.3248
hg19_snp150Common_rs76283354 range=chr5:92623916-92623934 5'pad=9 3'pad=9 strand=+ repeatMasking=none	0.811144
hg19_snp150Common_rs7711021 range=chr5:141067722-141067740 5'pad=9 3'pad=9 strand=+ repeatMasking=none	-2.3196
hg19_snp150Common_rs7721240 range=chr5:33714541-33714559 5'pad=9 3'pad=9 strand=+ repeatMasking=none	-0.039923
hg19_snp150Common_rs77213101 range=chr5:107526107-107526125 5'pad=9 3'pad=9 strand=+ repeatMasking=none	1.45835
hg19_snp150Common_rs77328004 range=chr5:22453475-22453493 5'pad=9 3'pad=9 strand=+ repeatMasking=none	-0.762007
hg19_snp150Common_rs77482947 range=chr5:7984402-7984420 5'pad=9 3'pad=9 strand=+ repeatMasking=none	0.270871
hg19_snp150Common_rs77552656 range=chr5:112105214-112105232 5'pad=9 3'pad=9 strand=+ repeatMasking=none	1.25815
hg19_snp150Common_rs77615485 range=chr5:162406175-162406193 5'pad=9 3'pad=9 strand=+ repeatMasking=none	-0.965888
hg19_snp150Common_rs77711939 range=chr5:90047474-90047492 5'pad=9 3'pad=9 strand=+ repeatMasking=none	-1.12122
hg19_snp150Common_rs80236608 range=chr5:129577965-129577983 5'pad=9 3'pad=9 strand=+ repeatMasking=none	-3.60101
hg19_snp150Common_rs80338118 range=chr5:113940323-113940341 5'pad=9 3'pad=9 strand=+ repeatMasking=none	-5.25955
hg19_snp150Common_rs998700 range=chr5:2562654-2562672 5'pad=9 3'pad=9 strand=+ repeatMasking=none	-0.24694
hg19_snp150Common_rs11155028 range=chr6:100181301-100181319 5'pad=9 3'pad=9 strand=+ repeatMasking=none	2.61144
hg19_snp150Common_rs111767345 range=chr6:112926144-112926162 5'pad=9 3'pad=9 strand=+ repeatMasking=none	-0.260819
hg19_snp150Common_rs112317519 range=chr6:158963587-158963605 5'pad=9 3'pad=9 strand=+ repeatMasking=none	-2.73557
hg19_snp150Common_rs112477576 range=chr6:7926249-7926267 5'pad=9 3'pad=9 strand=+ repeatMasking=none	-1.34513
hg19_snp150Common_rs113355946 range=chr6:68657366-68657384 5'pad=9 3'pad=9 strand=+ repeatMasking=none	3.07454
hg19_snp150Common_rs114028431 range=chr6:127864270-127864288 5'pad=9 3'pad=9 strand=+ repeatMasking=none	3.0708
hg19_snp150Common_rs114167758 range=chr6:47936131-47936149 5'pad=9 3'pad=9 strand=+ repeatMasking=none	4.2147
hg19_snp150Common_rs115113889 range=chr6:39408873-39408891 5'pad=9 3'pad=9 strand=+ repeatMasking=none	-1.61278
hg19_snp150Common_rs115200485 range=chr6:32521334-32521352 5'pad=9 3'pad=9 strand=+ repeatMasking=none	-1.85353
hg19_snp150Common_rs115562064 range=chr6:125945539-125945557 5'pad=9 3'pad=9 strand=+ repeatMasking=none	-0.290861
hg19_snp150Common_rs115624624 range=chr6:32599074-32599092 5'pad=9 3'pad=9 strand=+ repeatMasking=none	0.742523
hg19_snp150Common_rs115934738 range=chr6:31304328-31304346 5'pad=9 3'pad=9 strand=+ repeatMasking=none	-0.239738
hg19_snp150Common_rs116095023 range=chr6:30729608-30729626 5'pad=9 3'pad=9 strand=+ repeatMasking=none	-0.300056
hg19_snp150Common_rs116145088 range=chr6:77463304-77463322 5'pad=9 3'pad=9 strand=+ repeatMasking=none	-2.53161
hg19_snp150Common_rs116720077 range=chr6:33252093-33252111 5'pad=9 3'pad=9 strand=+ repeatMasking=none	1.27899
hg19_snp150Common_rs117421600 range=chr6:29926207-29926225 5'pad=9 3'pad=9 strand=+ repeatMasking=none	2.16122
hg19_snp150Common_rs11755072 range=chr6:35799801-35799819 5'pad=9 3'pad=9 strand=+ repeatMasking=none	0.739742
hg19_snp150Common_rs117731051 range=chr6:86560489-86560507 5'pad=9 3'pad=9 strand=+ repeatMasking=none	0.266543
hg19_snp150Common_rs12190254 range=chr6:68252972-68252990 5'pad=9 3'pad=9 strand=+ repeatMasking=none	-1.01432
hg19_snp150Common_rs12195449 range=chr6:111012663-111012681 5'pad=9 3'pad=9 strand=+ repeatMasking=none	-3.30588
hg19_snp150Common_rs12202055 range=chr6:37486071-37486089 5'pad=9 3'pad=9 strand=+ repeatMasking=none	3.31559
hg19_snp150Common_rs12202747 range=chr6:133476506-133476524 5'pad=9 3'pad=9 strand=+ repeatMasking=none	-2.09952
hg19_snp150Common_rs12215088 range=chr6:133186976-133186994 5'pad=9 3'pad=9 strand=+ repeatMasking=none	2.07125
hg19_snp150Common_rs12527856 range=chr6:159374822-159374840 5'pad=9 3'pad=9 strand=+ repeatMasking=none	0.110093
hg19_snp150Common_rs13199891 range=chr6:23741726-23741744 5'pad=9 3'pad=9 strand=+ repeatMasking=none	0.354934
hg19_snp150Common_rs138946814 range=chr6:30357172-30357190 5'pad=9 3'pad=9 strand=+ repeatMasking=none	-1.29338
hg19_snp150Common_rs145789128 range=chr6:127644630-127644648 5'pad=9 3'pad=9 strand=+ repeatMasking=none	-1.27205
hg19_snp150Common_rs1611672 range=chr6:29825405-29825423 5'pad=9 3'pad=9 strand=+ repeatMasking=none	-3.77161
hg19_snp150Common_rs1611819 range=chr6:7034666-7034684 5'pad=9 3'pad=9 strand=- repeatMasking=none	-0.123976
hg19_snp150Common_rs17743190 range=chr6:80107670-80107688 5'pad=9 3'pad=9 strand=+ repeatMasking=none	2.9506
hg19_snp150Common_rs1830829 range=chr6:49972456-49972474 5'pad=9 3'pad=9 strand=+ repeatMasking=none	1.53824
hg19_snp150Common_rs183897916 range=chr6:32541269-32541287 5'pad=9 3'pad=9 strand=+ repeatMasking=none	-1.06711
hg19_snp150Common_rs191197510 range=chr6:90512161-90512179 5'pad=9 3'pad=9 strand=+ repeatMasking=none	-1.11765
hg19_snp150Common_rs191923080 range=chr6:29521391-29521409 5'pad=9 3'pad=9 strand=+ repeatMasking=none	-1.19196
hg19_snp150Common_rs2345978 range=chr6:63184504-63184522 5'pad=9 3'pad=9 strand=+ repeatMasking=none	-2.97727
hg19_snp150Common_rs2517614 range=chr6:30163946-30163964 5'pad=9 3'pad=9 strand=- repeatMasking=none	-1.03003
hg19_snp150Common_rs2523698 range=chr6:31453875-31453893 5'pad=9 3'pad=9 strand=- repeatMasking=none	-0.573814
hg19_snp150Common_rs2621390 range=chr6:32757444-32757462 5'pad=9 3'pad=9 strand=- repeatMasking=none	-0.190561
hg19_snp150Common_rs2747464 range=chr6:29657490-29657508 5'pad=9 3'pad=9 strand=+ repeatMasking=none	-1.72035
hg19_snp150Common_rs28361078 range=chr6:33096483-33096501 5'pad=9 3'pad=9 strand=+ repeatMasking=none	-1.30463
hg19_snp150Common_rs28637635 range=chr6:95054960-95054978 5'pad=9 3'pad=9 strand=+ repeatMasking=none	0.386757
hg19_snp150Common_rs28669773 range=chr6:32589086-32589104 5'pad=9 3'pad=9 strand=+ repeatMasking=none	0.4476
hg19_snp150Common_rs28752938 range=chr6:31304343-31304361 5'pad=9 3'pad=9 strand=+ repeatMasking=none	-0.581136
hg19_snp150Common_rs2934227 range=chr6:92822569-92822587 5'pad=9 3'pad=9 strand=- repeatMasking=none	0.514387
hg19_snp150Common_rs295337 range=chr6:159586448-159586466 5'pad=9 3'pad=9 strand=- repeatMasking=none	1.32786
hg19_snp150Common_rs2984480 range=chr6:8726083-8726101 5'pad=9 3'pad=9 strand=+ repeatMasking=none	-2.0881
hg19_snp150Common_rs3094170 range=chr6:29829256-29829274 5'pad=9 3'pad=9 strand=- repeatMasking=none	1.59075
hg19_snp150Common_rs3129919 range=chr6:32332782-32332800 5'pad=9 3'pad=9 strand=+ repeatMasking=none	6.73002
hg19_snp150Common_rs3130681 range=chr6:31880602-31880620 5'pad=9 3'pad=9 strand=+ repeatMasking=none	1.93853
hg19_snp150Common_rs33987921 range=chr6:30369387-30369405 5'pad=9 3'pad=9 strand=+ repeatMasking=none	0.444811
hg19_snp150Common_rs34798299 range=chr6:168160319-168160337 5'pad=9 3'pad=9 strand=+ repeatMasking=none	-5.20051
hg19_snp150Common_rs35161970 range=chr6:148248347-148248365 5'pad=9 3'pad=9 strand=+ repeatMasking=none	3.84951
hg19_snp150Common_rs35194487 range=chr6:32361934-32361952 5'pad=9 3'pad=9 strand=+ repeatMasking=none	-0.688743
hg19_snp150Common_rs3763324 range=chr6:32406892-32406910 5'pad=9 3'pad=9 strand=+ repeatMasking=none	-0.266977
hg19_snp150Common_rs377370 range=chr6:31942505-31942523 5'pad=9 3'pad=9 strand=- repeatMasking=none	2.49144
hg19_snp150Common_rs3800332 range=chr6:30270612-30270630 5'pad=9 3'pad=9 strand=+ repeatMasking=none	-1.55914
hg19_snp150Common_rs3869085 range=chr6:30870104-30870122 5'pad=9 3'pad=9 strand=- repeatMasking=none	4.79802
hg19_snp150Common_rs4252165 range=chr6:161161550-161161568 5'pad=9 3'pad=9 strand=+ repeatMasking=none	0.710798
hg19_snp150Common_rs4706921 range=chr6:82751007-82751025 5'pad=9 3'pad=9 strand=+ repeatMasking=none	-1.64593
hg19_snp150Common_rs4708946 range=chr6:162671930-162671948 5'pad=9 3'pad=9 strand=+ repeatMasking=none	1.76972
hg19_snp150Common_rs4870347 range=chr6:155395034-155395052 5'pad=9 3'pad=9 strand=+ repeatMasking=none	-0.468382
hg19_snp150Common_rs528516 range=chr6:81638345-81638363 5'pad=9 3'pad=9 strand=+ repeatMasking=none	0.54996
hg19_snp150Common_rs531191 range=chr6:84241959-84241977 5'pad=9 3'pad=9 strand=- repeatMasking=none	-1.68794
hg19_snp150Common_rs535150750 range=chr6:68455646-68455664 5'pad=9 3'pad=9 strand=+ repeatMasking=none	0.372538
hg19_snp150Common_rs572145395 range=chr6:169265049-169265067 5'pad=9 3'pad=9 strand=+ repeatMasking=none	2.69926
hg19_snp150Common_rs582546 range=chr6:137968139-137968157 5'pad=9 3'pad=9 strand=- repeatMasking=none	2.7091
hg19_snp150Common_rs61193059 range=chr6:170007512-170007530 5'pad=9 3'pad=9 strand=+ repeatMasking=none	-1.21736
hg19_snp150Common_rs62392943 range=chr6:29602053-29602071 5'pad=9 3'pad=9 strand=+ repeatMasking=none	-1.77406
hg19_snp150Common_rs62397685 range=chr6:32789102-32789120 5'pad=9 3'pad=9 strand=+ repeatMasking=none	-0.561279
hg19_snp150Common_rs639316 range=chr6:17863631-17863649 5'pad=9 3'pad=9 strand=- repeatMasking=none	-0.562694
hg19_snp150Common_rs642561 range=chr6:153128802-153128820 5'pad=9 3'pad=9 strand=+ repeatMasking=none	3.33937
hg19_snp150Common_rs6456727 range=chr6:26471146-26471164 5'pad=9 3'pad=9 strand=+ repeatMasking=none	-13.414
hg19_snp150Common_rs6900056 range=chr6:82262691-82262709 5'pad=9 3'pad=9 strand=+ repeatMasking=none	-2.65806
hg19_snp150Common_rs6909136 range=chr6:132655542-132655560 5'pad=9 3'pad=9 strand=+ repeatMasking=none	2.54356
hg19_snp150Common_rs72868608 range=chr6:57051920-57051938 5'pad=9 3'pad=9 strand=+ repeatMasking=none	-1.0094
hg19_snp150Common_rs73266849 range=chr6:167208834-167208852 5'pad=9 3'pad=9 strand=+ repeatMasking=none	-0.562401
hg19_snp150Common_rs74574912 range=chr6:6448947-6448965 5'pad=9 3'pad=9 strand=+ repeatMasking=none	4.52412
hg19_snp150Common_rs75397260 range=chr6:107133967-107133985 5'pad=9 3'pad=9 strand=+ repeatMasking=none	-0.01842
hg19_snp150Common_rs75652977 range=chr6:113829699-113829717 5'pad=9 3'pad=9 strand=+ repeatMasking=none	0.326735
hg19_snp150Common_rs76028171 range=chr6:125222263-125222281 5'pad=9 3'pad=9 strand=+ repeatMasking=none	-0.87561
hg19_snp150Common_rs76686563 range=chr6:165871648-165871666 5'pad=9 3'pad=9 strand=+ repeatMasking=none	-2.91781
hg19_snp150Common_rs76911435 range=chr6:155882500-155882518 5'pad=9 3'pad=9 strand=+ repeatMasking=none	-1.94287
hg19_snp150Common_rs7748430 range=chr6:211756-211774 5'pad=9 3'pad=9 strand=+ repeatMasking=none	-1.07006
hg19_snp150Common_rs77485146 range=chr6:57494961-57494979 5'pad=9 3'pad=9 strand=+ repeatMasking=none	0
hg19_snp150Common_rs77515437 range=chr6:47662271-47662289 5'pad=9 3'pad=9 strand=+ repeatMasking=none	-0.610319
hg19_snp150Common_rs7759033 range=chr6:116297505-116297523 5'pad=9 3'pad=9 strand=+ repeatMasking=none	-0.701191
hg19_snp150Common_rs7764772 range=chr6:3657929-3657947 5'pad=9 3'pad=9 strand=+ repeatMasking=none	1.58458
hg19_snp150Common_rs78176095 range=chr6:30045873-30045891 5'pad=9 3'pad=9 strand=+ repeatMasking=none	-1.41655
hg19_snp150Common_rs783173 range=chr6:161172933-161172951 5'pad=9 3'pad=9 strand=- repeatMasking=none	0.678171
hg19_snp150Common_rs78402957 range=chr6:138654063-138654081 5'pad=9 3'pad=9 strand=+ repeatMasking=none	0.395615
hg19_snp150Common_rs79020737 range=chr6:23777784-23777802 5'pad=9 3'pad=9 strand=+ repeatMasking=none	-0.012062
hg19_snp150Common_rs80009748 range=chr6:94088511-94088529 5'pad=9 3'pad=9 strand=+ repeatMasking=none	-0.543128
hg19_snp150Common_rs80288336 range=chr6:91561840-91561858 5'pad=9 3'pad=9 strand=+ repeatMasking=none	3.74866
hg19_snp150Common_rs856022 range=chr6:169375547-169375565 5'pad=9 3'pad=9 strand=- repeatMasking=none	1.03189
hg19_snp150Common_rs9258945 range=chr6:29839470-29839488 5'pad=9 3'pad=9 strand=+ repeatMasking=none	-0.885227
hg19_snp150Common_rs9265963 range=chr6:31315531-31315549 5'pad=9 3'pad=9 strand=+ repeatMasking=none	5.87907
hg19_snp150Common_rs9271626 range=chr6:32591935-32591953 5'pad=9 3'pad=9 strand=+ repeatMasking=none	1.20217
hg19_snp150Common_rs9275996 range=chr6:32694392-32694410 5'pad=9 3'pad=9 strand=+ repeatMasking=none	0.172826
hg19_snp150Common_rs9276206 range=chr6:32699808-32699826 5'pad=9 3'pad=9 strand=+ repeatMasking=none	-1.71001
hg19_snp150Common_rs9276694 range=chr6:32756021-32756039 5'pad=9 3'pad=9 strand=+ repeatMasking=none	1.189
hg19_snp150Common_rs9332741 range=chr6:31909331-31909349 5'pad=9 3'pad=9 strand=+ repeatMasking=none	2.10084
hg19_snp150Common_rs9342010 range=chr6:85864600-85864618 5'pad=9 3'pad=9 strand=+ repeatMasking=none	3.97671
hg19_snp150Common_rs9344476 range=chr6:85918860-85918878 5'pad=9 3'pad=9 strand=+ repeatMasking=none	-1.32289
hg19_snp150Common_rs9345273 range=chr6:93499270-93499288 5'pad=9 3'pad=9 strand=+ repeatMasking=none	3.44336
hg19_snp150Common_rs9361552 range=chr6:80439674-80439692 5'pad=9 3'pad=9 strand=+ repeatMasking=none	0.365929
hg19_snp150Common_rs9375652 range=chr6:129981997-129982015 5'pad=9 3'pad=9 strand=+ repeatMasking=none	1.28262
hg19_snp150Common_rs9387742 range=chr6:120633089-120633107 5'pad=9 3'pad=9 strand=+ repeatMasking=none	-1.22032
hg19_snp150Common_rs9389863 range=chr6:141381937-141381955 5'pad=9 3'pad=9 strand=+ repeatMasking=none	-3.64204
hg19_snp150Common_rs9461684 range=chr6:31253435-31253453 5'pad=9 3'pad=9 strand=+ repeatMasking=none	-1.31926
hg19_snp150Common_rs9491508 range=chr6:126153470-126153488 5'pad=9 3'pad=9 strand=+ repeatMasking=none	0.026961
hg19_snp150Common_rs1008364 range=chr7:47070001-47070019 5'pad=9 3'pad=9 strand=- repeatMasking=none	-0.68021
hg19_snp150Common_rs10231915 range=chr7:97161929-97161947 5'pad=9 3'pad=9 strand=+ repeatMasking=none	-0.611125
hg19_snp150Common_rs10236369 range=chr7:12280829-12280847 5'pad=9 3'pad=9 strand=+ repeatMasking=none	-0.209548
hg19_snp150Common_rs10281627 range=chr7:149598177-149598195 5'pad=9 3'pad=9 strand=+ repeatMasking=none	2.34284
hg19_snp150Common_rs112339797 range=chr7:138359250-138359268 5'pad=9 3'pad=9 strand=+ repeatMasking=none	-2.27978
hg19_snp150Common_rs113527368 range=chr7:107143112-107143130 5'pad=9 3'pad=9 strand=+ repeatMasking=none	1.99424
hg19_snp150Common_rs114826549 range=chr7:146020569-146020587 5'pad=9 3'pad=9 strand=+ repeatMasking=none	-0.10607
hg19_snp150Common_rs115922847 range=chr7:122236034-122236052 5'pad=9 3'pad=9 strand=+ repeatMasking=none	1.15278
hg19_snp150Common_rs116359103 range=chr7:19300955-19300973 5'pad=9 3'pad=9 strand=+ repeatMasking=none	-0.544552
hg19_snp150Common_rs116504319 range=chr7:128071456-128071474 5'pad=9 3'pad=9 strand=+ repeatMasking=none	-0.555006
hg19_snp150Common_rs118011720 range=chr7:71548536-71548554 5'pad=9 3'pad=9 strand=+ repeatMasking=none	-0.308136
hg19_snp150Common_rs118107733 range=chr7:104646365-104646383 5'pad=9 3'pad=9 strand=+ repeatMasking=none	-1.71131
hg19_snp150Common_rs12538824 range=chr7:4948367-4948385 5'pad=9 3'pad=9 strand=+ repeatMasking=none	-0.039293
hg19_snp150Common_rs1294353 range=chr7:141698717-141698735 5'pad=9 3'pad=9 strand=- repeatMasking=none	-1.83087
hg19_snp150Common_rs13232518 range=chr7:103496514-103496532 5'pad=9 3'pad=9 strand=+ repeatMasking=none	2.14473
hg19_snp150Common_rs13437671 range=chr7:77876357-77876375 5'pad=9 3'pad=9 strand=+ repeatMasking=none	0.007251
hg19_snp150Common_rs1371817 range=chr7:154877258-154877276 5'pad=9 3'pad=9 strand=+ repeatMasking=none	0.751206
hg19_snp150Common_rs1425124 range=chr7:37448196-37448214 5'pad=9 3'pad=9 strand=- repeatMasking=none	0.998467
hg19_snp150Common_rs146448884 range=chr7:20703577-20703595 5'pad=9 3'pad=9 strand=+ repeatMasking=none	0.95962
hg19_snp150Common_rs149090848 range=chr7:150102221-150102239 5'pad=9 3'pad=9 strand=+ repeatMasking=none	-2.40205
hg19_snp150Common_rs1630434 range=chr7:75685392-75685410 5'pad=9 3'pad=9 strand=+ repeatMasking=none	0.819769
hg19_snp150Common_rs17138223 range=chr7:17755673-17755691 5'pad=9 3'pad=9 strand=+ repeatMasking=none	1.09047
hg19_snp150Common_rs17156080 range=chr7:27993810-27993828 5'pad=9 3'pad=9 strand=+ repeatMasking=none	0.624314
hg19_snp150Common_rs176556 range=chr7:105803677-105803695 5'pad=9 3'pad=9 strand=+ repeatMasking=none	-1.66189
hg19_snp150Common_rs181457139 range=chr7:133787915-133787933 5'pad=9 3'pad=9 strand=+ repeatMasking=none	-0.652047
hg19_snp150Common_rs1880792 range=chr7:136825513-136825531 5'pad=9 3'pad=9 strand=- repeatMasking=none	1.62115
hg19_snp150Common_rs1987859 range=chr7:50637641-50637659 5'pad=9 3'pad=9 strand=- repeatMasking=none	5.30093
hg19_snp150Common_rs199816128 range=chr7:81608064-81608082 5'pad=9 3'pad=9 strand=+ repeatMasking=none	0.376973
hg19_snp150Common_rs2464948 range=chr7:52165032-52165050 5'pad=9 3'pad=9 strand=+ repeatMasking=none	0.034682
hg19_snp150Common_rs2529077 range=chr7:24566826-24566844 5'pad=9 3'pad=9 strand=- repeatMasking=none	-1.19721
hg19_snp150Common_rs2687479 range=chr7:125868006-125868024 5'pad=9 3'pad=9 strand=+ repeatMasking=none	3.75498
hg19_snp150Common_rs28815597 range=chr7:38611195-38611213 5'pad=9 3'pad=9 strand=+ repeatMasking=none	1.08523
hg19_snp150Common_rs34924586 range=chr7:117356183-117356201 5'pad=9 3'pad=9 strand=+ repeatMasking=none	-1.29365
hg19_snp150Common_rs3802020 range=chr7:90390072-90390090 5'pad=9 3'pad=9 strand=+ repeatMasking=none	0.289928
hg19_snp150Common_rs3925303 range=chr7:21836466-21836484 5'pad=9 3'pad=9 strand=+ repeatMasking=none	-0.11168
hg19_snp150Common_rs3935165 range=chr7:55715396-55715414 5'pad=9 3'pad=9 strand=+ repeatMasking=none	0.161394
hg19_snp150Common_rs39582 range=chr7:40953310-40953328 5'pad=9 3'pad=9 strand=+ repeatMasking=none	3.71066
hg19_snp150Common_rs4148731 range=chr7:87239320-87239338 5'pad=9 3'pad=9 strand=- repeatMasking=none	0.558137
hg19_snp150Common_rs42070 range=chr7:95715759-95715777 5'pad=9 3'pad=9 strand=- repeatMasking=none	0.803709
hg19_snp150Common_rs4730136 range=chr7:105766457-105766475 5'pad=9 3'pad=9 strand=+ repeatMasking=none	1.14449
hg19_snp150Common_rs535421758 range=chr7:67927696-67927714 5'pad=9 3'pad=9 strand=+ repeatMasking=none	-0.625248
hg19_snp150Common_rs554913002 range=chr7:75323804-75323822 5'pad=9 3'pad=9 strand=+ repeatMasking=none	-1.37437
hg19_snp150Common_rs564128815 range=chr7:98468234-98468252 5'pad=9 3'pad=9 strand=+ repeatMasking=none	-0.596741
hg19_snp150Common_rs57348047 range=chr7:20308398-20308416 5'pad=9 3'pad=9 strand=+ repeatMasking=none	-1.74903
hg19_snp150Common_rs57417551 range=chr7:7413357-7413375 5'pad=9 3'pad=9 strand=+ repeatMasking=none	0.827215
hg19_snp150Common_rs58032580 range=chr7:47139153-47139171 5'pad=9 3'pad=9 strand=+ repeatMasking=none	-1.40108
hg19_snp150Common_rs58980976 range=chr7:4187907-4187925 5'pad=9 3'pad=9 strand=+ repeatMasking=none	-2.48665
hg19_snp150Common_rs59129513 range=chr7:74006652-74006670 5'pad=9 3'pad=9 strand=+ repeatMasking=none	0.681697
hg19_snp150Common_rs59989496 range=chr7:121055654-121055672 5'pad=9 3'pad=9 strand=+ repeatMasking=none	-1.12057
hg19_snp150Common_rs61121205 range=chr7:95160637-95160655 5'pad=9 3'pad=9 strand=+ repeatMasking=none	4.12888
hg19_snp150Common_rs62432610 range=chr7:7768551-7768569 5'pad=9 3'pad=9 strand=+ repeatMasking=none	-0.434688
hg19_snp150Common_rs62482546 range=chr7:107112430-107112448 5'pad=9 3'pad=9 strand=+ repeatMasking=none	0.006
hg19_snp150Common_rs62487870 range=chr7:158938432-158938450 5'pad=9 3'pad=9 strand=+ repeatMasking=none	0.649755
hg19_snp150Common_rs62496885 range=chr7:97258620-97258638 5'pad=9 3'pad=9 strand=+ repeatMasking=none	6.92801
hg19_snp150Common_rs6944745 range=chr7:3348050-3348068 5'pad=9 3'pad=9 strand=+ repeatMasking=none	2.30243
hg19_snp150Common_rs6946760 range=chr7:145615037-145615055 5'pad=9 3'pad=9 strand=+ repeatMasking=none	-0.200321
hg19_snp150Common_rs6948498 range=chr7:39841169-39841187 5'pad=9 3'pad=9 strand=+ repeatMasking=none	-0.701965
hg19_snp150Common_rs6954736 range=chr7:49899379-49899397 5'pad=9 3'pad=9 strand=+ repeatMasking=none	-1.54622
hg19_snp150Common_rs6956329 range=chr7:132804463-132804481 5'pad=9 3'pad=9 strand=+ repeatMasking=none	-2.28482
hg19_snp150Common_rs6965230 range=chr7:93022860-93022878 5'pad=9 3'pad=9 strand=+ repeatMasking=none	-0.805484
hg19_snp150Common_rs6971336 range=chr7:90575392-90575410 5'pad=9 3'pad=9 strand=+ repeatMasking=none	2.59729
hg19_snp150Common_rs6975713 range=chr7:73340734-73340752 5'pad=9 3'pad=9 strand=+ repeatMasking=none	0.797154
hg19_snp150Common_rs72611523 range=chr7:135562434-135562452 5'pad=9 3'pad=9 strand=+ repeatMasking=none	0.510075
hg19_snp150Common_rs73271539 range=chr7:13872069-13872087 5'pad=9 3'pad=9 strand=+ repeatMasking=none	1.64616
hg19_snp150Common_rs73299552 range=chr7:29776788-29776806 5'pad=9 3'pad=9 strand=+ repeatMasking=none	-1.53518
hg19_snp150Common_rs73336050 range=chr7:52279999-52280017 5'pad=9 3'pad=9 strand=+ repeatMasking=none	-1.29929
hg19_snp150Common_rs73412399 range=chr7:107808284-107808302 5'pad=9 3'pad=9 strand=+ repeatMasking=none	1.64118
hg19_snp150Common_rs74794332 range=chr7:25422147-25422165 5'pad=9 3'pad=9 strand=+ repeatMasking=none	2.8514
hg19_snp150Common_rs75186967 range=chr7:50971752-50971770 5'pad=9 3'pad=9 strand=+ repeatMasking=none	1.21328
hg19_snp150Common_rs75636500 range=chr7:99947648-99947666 5'pad=9 3'pad=9 strand=+ repeatMasking=none	-4.24109
hg19_snp150Common_rs756912 range=chr7:71741788-71741806 5'pad=9 3'pad=9 strand=+ repeatMasking=none	-1.50068
hg19_snp150Common_rs76637962 range=chr7:73345575-73345593 5'pad=9 3'pad=9 strand=+ repeatMasking=none	11.9125
hg19_snp150Common_rs76659849 range=chr7:50788624-50788642 5'pad=9 3'pad=9 strand=+ repeatMasking=none	0.498488
hg19_snp150Common_rs77116012 range=chr7:1083326-1083344 5'pad=9 3'pad=9 strand=+ repeatMasking=none	0.976215
hg19_snp150Common_rs7783097 range=chr7:28289352-28289370 5'pad=9 3'pad=9 strand=+ repeatMasking=none	-0.721116
hg19_snp150Common_rs7784885 range=chr7:97593878-97593896 5'pad=9 3'pad=9 strand=+ repeatMasking=none	-0.48597
hg19_snp150Common_rs7811989 range=chr7:17371354-17371372 5'pad=9 3'pad=9 strand=+ repeatMasking=none	-0.300808
hg19_snp150Common_rs782520 range=chr7:134194492-134194510 5'pad=9 3'pad=9 strand=+ repeatMasking=none	-3.08508
hg19_snp150Common_rs78370509 range=chr7:93964925-93964943 5'pad=9 3'pad=9 strand=+ repeatMasking=none	0.410007
hg19_snp150Common_rs78642857 range=chr7:153889994-153890012 5'pad=9 3'pad=9 strand=+ repeatMasking=none	2.14408
hg19_snp150Common_rs79438059 range=chr7:53827992-53828010 5'pad=9 3'pad=9 strand=+ repeatMasking=none	-0.662879
hg19_snp150Common_rs79723981 range=chr7:26449338-26449356 5'pad=9 3'pad=9 strand=+ repeatMasking=none	1.78811
hg19_snp150Common_rs798947 range=chr7:120763203-120763221 5'pad=9 3'pad=9 strand=+ repeatMasking=none	0.127156
hg19_snp150Common_rs798948 range=chr7:120764564-120764582 5'pad=9 3'pad=9 strand=+ repeatMasking=none	0.253525
hg19_snp150Common_rs80182002 range=chr7:84410039-84410057 5'pad=9 3'pad=9 strand=+ repeatMasking=none	-3.72621
hg19_snp150Common_rs9638242 range=chr7:66756300-66756318 5'pad=9 3'pad=9 strand=+ repeatMasking=none	2.46018
hg19_snp150Common_rs10957183 range=chr8:49551135-49551153 5'pad=9 3'pad=9 strand=+ repeatMasking=none	-0.183555
hg19_snp150Common_rs11166759 range=chr8:138788003-138788021 5'pad=9 3'pad=9 strand=+ repeatMasking=none	-2.8386
hg19_snp150Common_rs112417021 range=chr8:125684920-125684938 5'pad=9 3'pad=9 strand=+ repeatMasking=none	3.29919
hg19_snp150Common_rs114275004 range=chr8:141000741-141000759 5'pad=9 3'pad=9 strand=+ repeatMasking=none	1.7511
hg19_snp150Common_rs114279532 range=chr8:19167272-19167290 5'pad=9 3'pad=9 strand=+ repeatMasking=none	-0.006514
hg19_snp150Common_rs114304348 range=chr8:96017068-96017086 5'pad=9 3'pad=9 strand=+ repeatMasking=none	0.885859
hg19_snp150Common_rs114558985 range=chr8:139909804-139909822 5'pad=9 3'pad=9 strand=+ repeatMasking=none	-3.73755
hg19_snp150Common_rs115403843 range=chr8:111858842-111858860 5'pad=9 3'pad=9 strand=+ repeatMasking=none	-0.17981
hg19_snp150Common_rs11992697 range=chr8:69726820-69726838 5'pad=9 3'pad=9 strand=+ repeatMasking=none	-1.25934
hg19_snp150Common_rs11998628 range=chr8:114734720-114734738 5'pad=9 3'pad=9 strand=+ repeatMasking=none	1.37669
hg19_snp150Common_rs12386968 range=chr8:16454353-16454371 5'pad=9 3'pad=9 strand=+ repeatMasking=none	-4.32439
hg19_snp150Common_rs12548440 range=chr8:87186590-87186608 5'pad=9 3'pad=9 strand=+ repeatMasking=none	-1.19809
hg19_snp150Common_rs12676702 range=chr8:135441435-135441453 5'pad=9 3'pad=9 strand=+ repeatMasking=none	-1.60888
hg19_snp150Common_rs12678724 range=chr8:122307490-122307508 5'pad=9 3'pad=9 strand=+ repeatMasking=none	1.13067
hg19_snp150Common_rs13265803 range=chr8:66283036-66283054 5'pad=9 3'pad=9 strand=+ repeatMasking=none	3.56209
hg19_snp150Common_rs1529765 range=chr8:75752075-75752093 5'pad=9 3'pad=9 strand=+ repeatMasking=none	-0.050172
hg19_snp150Common_rs17680595 range=chr8:138465153-138465171 5'pad=9 3'pad=9 strand=+ repeatMasking=none	3.06557
hg19_snp150Common_rs17695527 range=chr8:18514615-18514633 5'pad=9 3'pad=9 strand=+ repeatMasking=none	0.374354
hg19_snp150Common_rs183208622 range=chr8:43165634-43165652 5'pad=9 3'pad=9 strand=+ repeatMasking=none	1.2926
hg19_snp150Common_rs199515276 range=chr8:82605743-82605761 5'pad=9 3'pad=9 strand=+ repeatMasking=none	0.714195
hg19_snp150Common_rs2162147 range=chr8:75614608-75614626 5'pad=9 3'pad=9 strand=- repeatMasking=none	-1.21467
hg19_snp150Common_rs2383936 range=chr8:76504955-76504973 5'pad=9 3'pad=9 strand=- repeatMasking=none	0.235972
hg19_snp150Common_rs2565096 range=chr8:40376420-40376438 5'pad=9 3'pad=9 strand=+ repeatMasking=none	1.22681
hg19_snp150Common_rs2740858 range=chr8:3810564-3810582 5'pad=9 3'pad=9 strand=- repeatMasking=none	-2.19575
hg19_snp150Common_rs28490296 range=chr8:120823775-120823793 5'pad=9 3'pad=9 strand=+ repeatMasking=none	4.79802
hg19_snp150Common_rs28770274 range=chr8:52213538-52213556 5'pad=9 3'pad=9 strand=+ repeatMasking=none	-2.40896
hg19_snp150Common_rs28821172 range=chr8:127002537-127002555 5'pad=9 3'pad=9 strand=+ repeatMasking=none	3.61156
hg19_snp150Common_rs289525 range=chr8:13244146-13244164 5'pad=9 3'pad=9 strand=- repeatMasking=none	1.59333
hg19_snp150Common_rs35860723 range=chr8:94282861-94282879 5'pad=9 3'pad=9 strand=+ repeatMasking=none	0.770055
hg19_snp150Common_rs500301 range=chr8:53843739-53843757 5'pad=9 3'pad=9 strand=- repeatMasking=none	-4.17902
hg19_snp150Common_rs532965308 range=chr8:7990767-7990785 5'pad=9 3'pad=9 strand=+ repeatMasking=none	0.134203
hg19_snp150Common_rs562314499 range=chr8:106804251-106804269 5'pad=9 3'pad=9 strand=+ repeatMasking=none	-0.267659
hg19_snp150Common_rs566315 range=chr8:102891780-102891798 5'pad=9 3'pad=9 strand=+ repeatMasking=none	2.66305
hg19_snp150Common_rs57453219 range=chr8:51424928-51424946 5'pad=9 3'pad=9 strand=+ repeatMasking=none	0.09233
hg19_snp150Common_rs57717339 range=chr8:15166658-15166676 5'pad=9 3'pad=9 strand=+ repeatMasking=none	-1.16118
hg19_snp150Common_rs62530792 range=chr8:71618758-71618776 5'pad=9 3'pad=9 strand=+ repeatMasking=none	1.16883
hg19_snp150Common_rs6985472 range=chr8:17328477-17328495 5'pad=9 3'pad=9 strand=+ repeatMasking=none	-0.572112
hg19_snp150Common_rs6986224 range=chr8:124608610-124608628 5'pad=9 3'pad=9 strand=+ repeatMasking=none	0.399743
hg19_snp150Common_rs6990827 range=chr8:130379321-130379339 5'pad=9 3'pad=9 strand=+ repeatMasking=none	-1.90988
hg19_snp150Common_rs7008449 range=chr8:50787580-50787598 5'pad=9 3'pad=9 strand=+ repeatMasking=none	1.15215
hg19_snp150Common_rs7012350 range=chr8:119183928-119183946 5'pad=9 3'pad=9 strand=+ repeatMasking=none	-2.10768
hg19_snp150Common_rs7017683 range=chr8:91959980-91959998 5'pad=9 3'pad=9 strand=+ repeatMasking=none	0.28894
hg19_snp150Common_rs71518810 range=chr8:102078387-102078405 5'pad=9 3'pad=9 strand=+ repeatMasking=none	2.40082
hg19_snp150Common_rs73184802 range=chr8:1999957-1999975 5'pad=9 3'pad=9 strand=+ repeatMasking=none	-1.50417
hg19_snp150Common_rs73210462 range=chr8:19123274-19123292 5'pad=9 3'pad=9 strand=+ repeatMasking=none	-1.87119
hg19_snp150Common_rs73242058 range=chr8:77879145-77879163 5'pad=9 3'pad=9 strand=+ repeatMasking=none	-1.69006
hg19_snp150Common_rs7464755 range=chr8:114568870-114568888 5'pad=9 3'pad=9 strand=+ repeatMasking=none	1.73067
hg19_snp150Common_rs76037927 range=chr8:90311756-90311774 5'pad=9 3'pad=9 strand=+ repeatMasking=none	0.400834
hg19_snp150Common_rs76146709 range=chr8:83596610-83596628 5'pad=9 3'pad=9 strand=+ repeatMasking=none	1.23417
hg19_snp150Common_rs76793343 range=chr8:108472814-108472832 5'pad=9 3'pad=9 strand=+ repeatMasking=none	0.163516
hg19_snp150Common_rs7819989 range=chr8:54489836-54489854 5'pad=9 3'pad=9 strand=+ repeatMasking=none	2.82011
hg19_snp150Common_rs7822293 range=chr8:15210660-15210678 5'pad=9 3'pad=9 strand=+ repeatMasking=none	-4.59798
hg19_snp150Common_rs7827208 range=chr8:13986833-13986851 5'pad=9 3'pad=9 strand=+ repeatMasking=none	-0.08067
hg19_snp150Common_rs78978157 range=chr8:144158336-144158354 5'pad=9 3'pad=9 strand=+ repeatMasking=none	-3.49383
hg19_snp150Common_rs79622297 range=chr8:463761-463779 5'pad=9 3'pad=9 strand=+ repeatMasking=none	-0.521254
hg19_snp150Common_rs80117194 range=chr8:125148074-125148092 5'pad=9 3'pad=9 strand=+ repeatMasking=none	-0.633347
hg19_snp150Common_rs867351 range=chr8:96349271-96349289 5'pad=9 3'pad=9 strand=+ repeatMasking=none	-1.18664
hg19_snp150Common_rs972723 range=chr8:106120261-106120279 5'pad=9 3'pad=9 strand=+ repeatMasking=none	4.03285
hg19_snp150Common_rs10429519 range=chr9:132281711-132281729 5'pad=9 3'pad=9 strand=+ repeatMasking=none	-1.61722
hg19_snp150Common_rs10491837 range=chr9:6367606-6367624 5'pad=9 3'pad=9 strand=+ repeatMasking=none	0.359319
hg19_snp150Common_rs10738432 range=chr9:16243220-16243238 5'pad=9 3'pad=9 strand=+ repeatMasking=none	3.33987
hg19_snp150Common_rs10868689 range=chr9:72817642-72817660 5'pad=9 3'pad=9 strand=+ repeatMasking=none	-1.62635
hg19_snp150Common_rs10962811 range=chr9:17005305-17005323 5'pad=9 3'pad=9 strand=+ repeatMasking=none	-1.34966
hg19_snp150Common_rs11144391 range=chr9:77956927-77956945 5'pad=9 3'pad=9 strand=+ repeatMasking=none	-0.490504
hg19_snp150Common_rs1122049 range=chr9:21562452-21562470 5'pad=9 3'pad=9 strand=+ repeatMasking=none	-2.15248
hg19_snp150Common_rs113892760 range=chr9:116944641-116944659 5'pad=9 3'pad=9 strand=+ repeatMasking=none	3.22592
hg19_snp150Common_rs114313106 range=chr9:98579323-98579341 5'pad=9 3'pad=9 strand=+ repeatMasking=none	-0.125187
hg19_snp150Common_rs115006010 range=chr9:115568144-115568162 5'pad=9 3'pad=9 strand=+ repeatMasking=none	-0.094222
hg19_snp150Common_rs115032019 range=chr9:105367637-105367655 5'pad=9 3'pad=9 strand=+ repeatMasking=none	1.3543
hg19_snp150Common_rs115274183 range=chr9:19848153-19848171 5'pad=9 3'pad=9 strand=+ repeatMasking=none	0.609334
hg19_snp150Common_rs116221097 range=chr9:128968910-128968928 5'pad=9 3'pad=9 strand=+ repeatMasking=none	1.55386
hg19_snp150Common_rs116740396 range=chr9:114804950-114804968 5'pad=9 3'pad=9 strand=+ repeatMasking=none	-3.30613
hg19_snp150Common_rs12003059 range=chr9:75497302-75497320 5'pad=9 3'pad=9 strand=+ repeatMasking=none	1.44393
hg19_snp150Common_rs12339230 range=chr9:510204-510222 5'pad=9 3'pad=9 strand=+ repeatMasking=none	4.43766
hg19_snp150Common_rs13290894 range=chr9:4867076-4867094 5'pad=9 3'pad=9 strand=+ repeatMasking=none	0.871847
hg19_snp150Common_rs13295654 range=chr9:17053430-17053448 5'pad=9 3'pad=9 strand=+ repeatMasking=none	-0.256931
hg19_snp150Common_rs142891553 range=chr9:880098-880116 5'pad=9 3'pad=9 strand=+ repeatMasking=none	-0.104291
hg19_snp150Common_rs143159728 range=chr9:136140604-136140622 5'pad=9 3'pad=9 strand=+ repeatMasking=none	-2.27606
hg19_snp150Common_rs148010326 range=chr9:15411325-15411343 5'pad=9 3'pad=9 strand=+ repeatMasking=none	1.25722
hg19_snp150Common_rs16918154 range=chr9:101807103-101807121 5'pad=9 3'pad=9 strand=+ repeatMasking=none	1.16921
hg19_snp150Common_rs16926092 range=chr9:924435-924453 5'pad=9 3'pad=9 strand=+ repeatMasking=none	-1.86854
hg19_snp150Common_rs16935421 range=chr9:34182543-34182561 5'pad=9 3'pad=9 strand=+ repeatMasking=none	0.354154
hg19_snp150Common_rs16936398 range=chr9:114621319-114621337 5'pad=9 3'pad=9 strand=+ repeatMasking=none	-0.272069
hg19_snp150Common_rs180977396 range=chr9:119603066-119603084 5'pad=9 3'pad=9 strand=+ repeatMasking=none	-1.43419
hg19_snp150Common_rs182264024 range=chr9:98841816-98841834 5'pad=9 3'pad=9 strand=+ repeatMasking=none	1.03502
hg19_snp150Common_rs182541514 range=chr9:20389210-20389228 5'pad=9 3'pad=9 strand=+ repeatMasking=none	-1.60194
hg19_snp150Common_rs2093913 range=chr9:117283377-117283395 5'pad=9 3'pad=9 strand=- repeatMasking=none	-0.177918
hg19_snp150Common_rs2183017 range=chr9:73803311-73803329 5'pad=9 3'pad=9 strand=+ repeatMasking=none	-0.488917
hg19_snp150Common_rs2768659 range=chr9:37426143-37426161 5'pad=9 3'pad=9 strand=- repeatMasking=none	-0.257119
hg19_snp150Common_rs2900346 range=chr9:105917807-105917825 5'pad=9 3'pad=9 strand=+ repeatMasking=none	0.712688
hg19_snp150Common_rs34014556 range=chr9:87145637-87145655 5'pad=9 3'pad=9 strand=+ repeatMasking=none	3.01703
hg19_snp150Common_rs3886111 range=chr9:83547418-83547436 5'pad=9 3'pad=9 strand=+ repeatMasking=none	2.30085
hg19_snp150Common_rs4642742 range=chr9:28309488-28309506 5'pad=9 3'pad=9 strand=+ repeatMasking=none	4.35171
hg19_snp150Common_rs4743973 range=chr9:97669795-97669813 5'pad=9 3'pad=9 strand=+ repeatMasking=none	-0.052701
hg19_snp150Common_rs546577 range=chr9:104172927-104172945 5'pad=9 3'pad=9 strand=+ repeatMasking=none	-1.27205
hg19_snp150Common_rs56090205 range=chr9:38245687-38245705 5'pad=9 3'pad=9 strand=+ repeatMasking=none	2.76457
hg19_snp150Common_rs58247870 range=chr9:4391792-4391810 5'pad=9 3'pad=9 strand=+ repeatMasking=none	-2.05829
hg19_snp150Common_rs60819482 range=chr9:129584706-129584724 5'pad=9 3'pad=9 strand=+ repeatMasking=none	-1.09776
hg19_snp150Common_rs635712 range=chr9:108415547-108415565 5'pad=9 3'pad=9 strand=+ repeatMasking=none	-1.09124
hg19_snp150Common_rs7025781 range=chr9:100988501-100988519 5'pad=9 3'pad=9 strand=+ repeatMasking=none	-5.03883
hg19_snp150Common_rs7034298 range=chr9:13811325-13811343 5'pad=9 3'pad=9 strand=+ repeatMasking=none	-0.586998
hg19_snp150Common_rs73412252 range=chr9:15652280-15652298 5'pad=9 3'pad=9 strand=+ repeatMasking=none	3.52219
hg19_snp150Common_rs75364463 range=chr9:73661740-73661758 5'pad=9 3'pad=9 strand=+ repeatMasking=none	-1.01032
hg19_snp150Common_rs77030519 range=chr9:3187240-3187258 5'pad=9 3'pad=9 strand=+ repeatMasking=none	-2.18843
hg19_snp150Common_rs77345686 range=chr9:72217109-72217127 5'pad=9 3'pad=9 strand=+ repeatMasking=none	2.22895
hg19_snp150Common_rs78294138 range=chr9:104115027-104115045 5'pad=9 3'pad=9 strand=+ repeatMasking=none	1.64953
hg19_snp150Common_rs7848729 range=chr9:739842-739860 5'pad=9 3'pad=9 strand=+ repeatMasking=none	-0.621007
hg19_snp150Common_rs78538897 range=chr9:126625376-126625394 5'pad=9 3'pad=9 strand=+ repeatMasking=none	2.70809
hg19_snp150Common_rs7861760 range=chr9:34368665-34368683 5'pad=9 3'pad=9 strand=+ repeatMasking=none	-0.665206
hg19_snp150Common_rs7868887 range=chr9:26086565-26086583 5'pad=9 3'pad=9 strand=+ repeatMasking=none	0.130263
hg19_snp150Common_rs78947525 range=chr9:12943395-12943413 5'pad=9 3'pad=9 strand=+ repeatMasking=none	0.990268
hg19_snp150Common_rs953414 range=chr9:128946766-128946784 5'pad=9 3'pad=9 strand=+ repeatMasking=none	2.0432
hg19_snp150Common_rs112338212 range=chrX:63948086-63948104 5'pad=9 3'pad=9 strand=+ repeatMasking=none	2.84625
hg19_snp150Common_rs113286358 range=chrX:148494909-148494927 5'pad=9 3'pad=9 strand=+ repeatMasking=none	-1.63195
hg19_snp150Common_rs1341254 range=chrX:137334439-137334457 5'pad=9 3'pad=9 strand=+ repeatMasking=none	-0.961546
hg19_snp150Common_rs141779336 range=chrX:7678010-7678028 5'pad=9 3'pad=9 strand=+ repeatMasking=none	-1.39143
hg19_snp150Common_rs141962344 range=chrX:21135985-21136003 5'pad=9 3'pad=9 strand=+ repeatMasking=none	-1.75406
hg19_snp150Common_rs142164750 range=chrX:33834837-33834855 5'pad=9 3'pad=9 strand=+ repeatMasking=none	1.21569
hg19_snp150Common_rs145667558 range=chrX:89026324-89026342 5'pad=9 3'pad=9 strand=+ repeatMasking=none	-0.402719
hg19_snp150Common_rs146406840 range=chrX:34257459-34257477 5'pad=9 3'pad=9 strand=+ repeatMasking=none	4.79263
hg19_snp150Common_rs147563315 range=chrX:116231316-116231334 5'pad=9 3'pad=9 strand=+ repeatMasking=none	2.56979
hg19_snp150Common_rs147625660 range=chrX:134214957-134214975 5'pad=9 3'pad=9 strand=+ repeatMasking=none	0.92146
hg19_snp150Common_rs148312707 range=chrX:28478171-28478189 5'pad=9 3'pad=9 strand=+ repeatMasking=none	0.317841
hg19_snp150Common_rs149376656 range=chrX:115160720-115160738 5'pad=9 3'pad=9 strand=+ repeatMasking=none	0.123302
hg19_snp150Common_rs150731337 range=chrX:98362665-98362683 5'pad=9 3'pad=9 strand=+ repeatMasking=none	12.1057
hg19_snp150Common_rs182206910 range=chrX:37629215-37629233 5'pad=9 3'pad=9 strand=+ repeatMasking=none	3.07264
hg19_snp150Common_rs183961101 range=chrX:126665072-126665090 5'pad=9 3'pad=9 strand=+ repeatMasking=none	-0.93321
hg19_snp150Common_rs184628685 range=chrX:47248915-47248933 5'pad=9 3'pad=9 strand=+ repeatMasking=none	-0.901285
hg19_snp150Common_rs191152163 range=chrX:91738982-91739000 5'pad=9 3'pad=9 strand=+ repeatMasking=none	3.78602
hg19_snp150Common_rs1936645 range=chrX:154198161-154198179 5'pad=9 3'pad=9 strand=- repeatMasking=none	1.70245
hg19_snp150Common_rs1993599 range=chrX:124607520-124607538 5'pad=9 3'pad=9 strand=- repeatMasking=none	2.59248
hg19_snp150Common_rs2075840 range=chrX:48672779-48672797 5'pad=9 3'pad=9 strand=+ repeatMasking=none	0.119862
hg19_snp150Common_rs2506846 range=chrX:136783730-136783748 5'pad=9 3'pad=9 strand=+ repeatMasking=none	1.57886
hg19_snp150Common_rs28620643 range=chrX:1541119-1541137 5'pad=9 3'pad=9 strand=+ repeatMasking=none	-1.53665
hg19_snp150Common_rs4240050 range=chrX:65699568-65699586 5'pad=9 3'pad=9 strand=+ repeatMasking=none	1.66371
hg19_snp150Common_rs4358925 range=chrX:78066464-78066482 5'pad=9 3'pad=9 strand=+ repeatMasking=none	1.86118
hg19_snp150Common_rs58458070 range=chrX:112215902-112215920 5'pad=9 3'pad=9 strand=+ repeatMasking=none	-0.131016
hg19_snp150Common_rs5909213 range=chrX:18739077-18739095 5'pad=9 3'pad=9 strand=+ repeatMasking=none	-2.33686
hg19_snp150Common_rs5915542 range=chrX:5378990-5379008 5'pad=9 3'pad=9 strand=+ repeatMasking=none	0.15128
hg19_snp150Common_rs5917854 range=chrX:39485111-39485129 5'pad=9 3'pad=9 strand=+ repeatMasking=none	1.68538
hg19_snp150Common_rs5921624 range=chrX:99932807-99932825 5'pad=9 3'pad=9 strand=+ repeatMasking=none	-2.92625
hg19_snp150Common_rs5924586 range=chrX:17074137-17074155 5'pad=9 3'pad=9 strand=+ repeatMasking=none	-1.84035
hg19_snp150Common_rs59840312 range=chrX:15270186-15270204 5'pad=9 3'pad=9 strand=+ repeatMasking=none	2.68763
hg19_snp150Common_rs5985061 range=chrX:88196218-88196236 5'pad=9 3'pad=9 strand=+ repeatMasking=none	-0.382993
hg19_snp150Common_rs5988132 range=chrX:114038916-114038934 5'pad=9 3'pad=9 strand=+ repeatMasking=none	0.431999
hg19_snp150Common_rs5989868 range=chrX:1784009-1784027 5'pad=9 3'pad=9 strand=+ repeatMasking=none	0.153584
hg19_snp150Common_rs5991101 range=chrX:115282413-115282431 5'pad=9 3'pad=9 strand=+ repeatMasking=none	-1.99116
hg19_snp150Common_rs62592165 range=chrX:33884514-33884532 5'pad=9 3'pad=9 strand=+ repeatMasking=none	3.56462
hg19_snp150Common_rs6528651 range=chrX:138878257-138878275 5'pad=9 3'pad=9 strand=+ repeatMasking=none	-1.93679
hg19_snp150Common_rs6611503 range=chrX:56399400-56399418 5'pad=9 3'pad=9 strand=+ repeatMasking=none	1.1677
hg19_snp150Common_rs7052592 range=chrX:148034833-148034851 5'pad=9 3'pad=9 strand=+ repeatMasking=none	-6.47061
hg19_snp150Common_rs73245507 range=chrX:146466611-146466629 5'pad=9 3'pad=9 strand=+ repeatMasking=none	-1.07671
hg19_snp150Common_rs73508075 range=chrX:84956034-84956052 5'pad=9 3'pad=9 strand=+ repeatMasking=none	-1.89012
hg19_snp150Common_rs75757045 range=chrX:139069150-139069168 5'pad=9 3'pad=9 strand=+ repeatMasking=none	-2.0881
hg19_snp150Common_rs769496733 range=chrX:124194031-124194049 5'pad=9 3'pad=9 strand=+ repeatMasking=none	0.709203
hg19_snp150Common_rs781896427 range=chrX:150137309-150137327 5'pad=9 3'pad=9 strand=+ repeatMasking=none	-1.31816
hg19_snp150Common_rs879023881 range=chrX:66612546-66612565 5'pad=9 3'pad=9 strand=- repeatMasking=none	0.904709
hg19_snp150Common_rs28620643 range=chrY:1491119-1491137 5'pad=9 3'pad=9 strand=+ repeatMasking=none	-1.53665
hg19_snp150Common_rs5989868 range=chrY:1734009-1734027 5'pad=9 3'pad=9 strand=+ repeatMasking=none	0.153584
hg19_snp150Common_rs759407913 range=chrY:16823213-16823231 5'pad=9 3'pad=9 strand=+ repeatMasking=none	-0.185596
hg19_snp150Common_rs10218969 range=chr10:58504294-58504312 5'pad=9 3'pad=9 strand=+ repeatMasking=none	-0.43624
hg19_snp150Common_rs1065338 range=chr10:102943679-102943697 5'pad=9 3'pad=9 strand=- repeatMasking=none	-2.54024
hg19_snp150Common_rs10733797 range=chr10:65604162-65604180 5'pad=9 3'pad=9 strand=+ repeatMasking=none	0.63593
hg19_snp150Common_rs10740587 range=chr10:56349548-56349566 5'pad=9 3'pad=9 strand=+ repeatMasking=none	0.636857
hg19_snp150Common_rs10763819 range=chr10:30990065-30990083 5'pad=9 3'pad=9 strand=+ repeatMasking=none	0.274839
hg19_snp150Common_rs10884315 range=chr10:108184538-108184556 5'pad=9 3'pad=9 strand=+ repeatMasking=none	1.24135
hg19_snp150Common_rs11015372 range=chr10:27199063-27199081 5'pad=9 3'pad=9 strand=+ repeatMasking=none	2.10068
hg19_snp150Common_rs11202882 range=chr10:90652920-90652938 5'pad=9 3'pad=9 strand=+ repeatMasking=none	0.719541
hg19_snp150Common_rs11255463 range=chr10:8008734-8008752 5'pad=9 3'pad=9 strand=+ repeatMasking=none	0.03471
hg19_snp150Common_rs113002843 range=chr10:71837342-71837360 5'pad=9 3'pad=9 strand=+ repeatMasking=none	-1.16314
hg19_snp150Common_rs114801568 range=chr10:129690449-129690467 5'pad=9 3'pad=9 strand=+ repeatMasking=none	-2.6627
hg19_snp150Common_rs115031919 range=chr10:55336530-55336548 5'pad=9 3'pad=9 strand=+ repeatMasking=none	0.207498
hg19_snp150Common_rs115208721 range=chr10:105985430-105985448 5'pad=9 3'pad=9 strand=+ repeatMasking=none	-0.334775
hg19_snp150Common_rs116058623 range=chr10:89967153-89967171 5'pad=9 3'pad=9 strand=+ repeatMasking=none	-1.43694
hg19_snp150Common_rs116997894 range=chr10:80107557-80107575 5'pad=9 3'pad=9 strand=+ repeatMasking=none	0.851269
hg19_snp150Common_rs117446192 range=chr10:88450803-88450821 5'pad=9 3'pad=9 strand=+ repeatMasking=none	-0.728315
hg19_snp150Common_rs11814011 range=chr10:116356398-116356416 5'pad=9 3'pad=9 strand=+ repeatMasking=none	-4.31325
hg19_snp150Common_rs12251800 range=chr10:27202546-27202564 5'pad=9 3'pad=9 strand=+ repeatMasking=none	0.512376
hg19_snp150Common_rs12771985 range=chr10:7723854-7723872 5'pad=9 3'pad=9 strand=+ repeatMasking=none	-4.28717
hg19_snp150Common_rs12780984 range=chr10:7578110-7578128 5'pad=9 3'pad=9 strand=+ repeatMasking=none	-2.97868
hg19_snp150Common_rs137935379 range=chr10:72217499-72217517 5'pad=9 3'pad=9 strand=+ repeatMasking=none	1.28346
hg19_snp150Common_rs140113100 range=chr10:131025110-131025128 5'pad=9 3'pad=9 strand=+ repeatMasking=none	-3.00951
hg19_snp150Common_rs1409329 range=chr10:6189357-6189375 5'pad=9 3'pad=9 strand=- repeatMasking=none	0.92502
hg19_snp150Common_rs142702808 range=chr10:27321539-27321557 5'pad=9 3'pad=9 strand=+ repeatMasking=none	-0.386631
hg19_snp150Common_rs143120938 range=chr10:116518053-116518071 5'pad=9 3'pad=9 strand=+ repeatMasking=none	1.63944
hg19_snp150Common_rs146531438 range=chr10:129107647-129107665 5'pad=9 3'pad=9 strand=+ repeatMasking=none	-2.22759
hg19_snp150Common_rs1916476 range=chr10:57479829-57479847 5'pad=9 3'pad=9 strand=+ repeatMasking=none	-4.09151
hg19_snp150Common_rs1925591 range=chr10:68820873-68820891 5'pad=9 3'pad=9 strand=- repeatMasking=none	-1.47425
hg19_snp150Common_rs1934977 range=chr10:96813697-96813715 5'pad=9 3'pad=9 strand=- repeatMasking=none	-0.232925
hg19_snp150Common_rs2474605 range=chr10:38450253-38450271 5'pad=9 3'pad=9 strand=+ repeatMasking=none	-3.4766
hg19_snp150Common_rs2505468 range=chr10:26045977-26045995 5'pad=9 3'pad=9 strand=+ repeatMasking=none	-3.54101
hg19_snp150Common_rs2577333 range=chr10:121373935-121373953 5'pad=9 3'pad=9 strand=+ repeatMasking=none	-5.2261
hg19_snp150Common_rs2579147 range=chr10:79560852-79560870 5'pad=9 3'pad=9 strand=- repeatMasking=none	-0.889428
hg19_snp150Common_rs2784707 range=chr10:88890154-88890172 5'pad=9 3'pad=9 strand=- repeatMasking=none	-0.739655
hg19_snp150Common_rs2935422 range=chr10:37120384-37120402 5'pad=9 3'pad=9 strand=- repeatMasking=none	1.64231
hg19_snp150Common_rs3104652 range=chr10:58838841-58838859 5'pad=9 3'pad=9 strand=- repeatMasking=none	0.493622
hg19_snp150Common_rs35073822 range=chr10:65747146-65747164 5'pad=9 3'pad=9 strand=+ repeatMasking=none	-2.04749
hg19_snp150Common_rs35462186 range=chr10:73139262-73139280 5'pad=9 3'pad=9 strand=+ repeatMasking=none	4.73258
hg19_snp150Common_rs368933878 range=chr10:6799638-6799656 5'pad=9 3'pad=9 strand=+ repeatMasking=none	0.650176
hg19_snp150Common_rs3758565 range=chr10:60998243-60998261 5'pad=9 3'pad=9 strand=- repeatMasking=none	-0.027795
hg19_snp150Common_rs4001914 range=chr10:132192402-132192420 5'pad=9 3'pad=9 strand=+ repeatMasking=none	-0.644408
hg19_snp150Common_rs564560672 range=chr10:47651914-47651932 5'pad=9 3'pad=9 strand=+ repeatMasking=none	-1.84035
hg19_snp150Common_rs576524527 range=chr10:121046779-121046797 5'pad=9 3'pad=9 strand=+ repeatMasking=none	-2.29377
hg19_snp150Common_rs60637844 range=chr10:92009124-92009142 5'pad=9 3'pad=9 strand=+ repeatMasking=none	-0.093702
hg19_snp150Common_rs61831293 range=chr10:4538195-4538213 5'pad=9 3'pad=9 strand=+ repeatMasking=none	-0.330934
hg19_snp150Common_rs61867762 range=chr10:95205941-95205959 5'pad=9 3'pad=9 strand=+ repeatMasking=none	11.6135
hg19_snp150Common_rs7073001 range=chr10:67278657-67278675 5'pad=9 3'pad=9 strand=+ repeatMasking=none	-4.04433
hg19_snp150Common_rs7075871 range=chr10:26901412-26901430 5'pad=9 3'pad=9 strand=+ repeatMasking=none	-0.828488
hg19_snp150Common_rs7080097 range=chr10:112946715-112946733 5'pad=9 3'pad=9 strand=+ repeatMasking=none	-0.080719
hg19_snp150Common_rs7100645 range=chr10:129908102-129908120 5'pad=9 3'pad=9 strand=+ repeatMasking=none	0.573878
hg19_snp150Common_rs72807725 range=chr10:71121229-71121247 5'pad=9 3'pad=9 strand=+ repeatMasking=none	-2.25774
hg19_snp150Common_rs76271666 range=chr10:18500297-18500315 5'pad=9 3'pad=9 strand=+ repeatMasking=none	1.30977
hg19_snp150Common_rs77135719 range=chr10:120585915-120585933 5'pad=9 3'pad=9 strand=+ repeatMasking=none	0.432101
hg19_snp150Common_rs77832882 range=chr10:64479880-64479898 5'pad=9 3'pad=9 strand=+ repeatMasking=none	0.817364
hg19_snp150Common_rs78909114 range=chr10:73473931-73473949 5'pad=9 3'pad=9 strand=+ repeatMasking=none	2.08613
hg19_snp150Common_rs7900280 range=chr10:75047775-75047793 5'pad=9 3'pad=9 strand=+ repeatMasking=none	-1.8692
hg19_snp150Common_rs7900513 range=chr10:43062978-43062996 5'pad=9 3'pad=9 strand=+ repeatMasking=none	-0.801277
hg19_snp150Common_rs7915849 range=chr10:65359975-65359993 5'pad=9 3'pad=9 strand=+ repeatMasking=none	-0.716953
hg19_snp150Common_rs79325250 range=chr10:84957368-84957386 5'pad=9 3'pad=9 strand=+ repeatMasking=none	0.336837
hg19_snp150Common_rs79749272 range=chr10:95491174-95491192 5'pad=9 3'pad=9 strand=+ repeatMasking=none	0.035358
hg19_snp150Common_rs80332149 range=chr10:73698484-73698502 5'pad=9 3'pad=9 strand=+ repeatMasking=none	-3.31899
hg19_snp150Common_rs9417119 range=chr10:34091673-34091691 5'pad=9 3'pad=9 strand=+ repeatMasking=none	-0.170226
hg19_snp150Common_rs10765254 range=chr11:89876812-89876830 5'pad=9 3'pad=9 strand=+ repeatMasking=none	1.92935
hg19_snp150Common_rs10769959 range=chr11:8818824-8818842 5'pad=9 3'pad=9 strand=+ repeatMasking=none	0.233487
hg19_snp150Common_rs10792802 range=chr11:71299177-71299195 5'pad=9 3'pad=9 strand=+ repeatMasking=none	0.944765
hg19_snp150Common_rs11022046 range=chr11:2295120-2295138 5'pad=9 3'pad=9 strand=+ repeatMasking=none	0.47054
hg19_snp150Common_rs11025369 range=chr11:20092387-20092405 5'pad=9 3'pad=9 strand=+ repeatMasking=none	1.08954
hg19_snp150Common_rs11028129 range=chr11:24756486-24756504 5'pad=9 3'pad=9 strand=+ repeatMasking=none	0.615623
hg19_snp150Common_rs11211983 range=chr11:106806811-106806829 5'pad=9 3'pad=9 strand=+ repeatMasking=none	2.49875
hg19_snp150Common_rs11215451 range=chr11:98323292-98323310 5'pad=9 3'pad=9 strand=+ repeatMasking=none	-2.06266
hg19_snp150Common_rs112159212 range=chr11:63124246-63124264 5'pad=9 3'pad=9 strand=+ repeatMasking=none	1.26998
hg19_snp150Common_rs11237217 range=chr11:77260774-77260792 5'pad=9 3'pad=9 strand=+ repeatMasking=none	1.23984
hg19_snp150Common_rs113368193 range=chr11:35401527-35401545 5'pad=9 3'pad=9 strand=+ repeatMasking=none	0.207043
hg19_snp150Common_rs113825569 range=chr11:26793039-26793057 5'pad=9 3'pad=9 strand=+ repeatMasking=none	1.33459
hg19_snp150Common_rs114370663 range=chr11:77060842-77060860 5'pad=9 3'pad=9 strand=+ repeatMasking=none	1.97696
hg19_snp150Common_rs114389353 range=chr11:23350809-23350827 5'pad=9 3'pad=9 strand=+ repeatMasking=none	0.307848
hg19_snp150Common_rs115993894 range=chr11:73136522-73136540 5'pad=9 3'pad=9 strand=+ repeatMasking=none	-1.57722
hg19_snp150Common_rs117391423 range=chr11:113968394-113968412 5'pad=9 3'pad=9 strand=+ repeatMasking=none	0.249526
hg19_snp150Common_rs12286918 range=chr11:110797482-110797500 5'pad=9 3'pad=9 strand=+ repeatMasking=none	-2.22389
hg19_snp150Common_rs12793403 range=chr11:94882643-94882661 5'pad=9 3'pad=9 strand=+ repeatMasking=none	1.69661
hg19_snp150Common_rs140200901 range=chr11:55233682-55233700 5'pad=9 3'pad=9 strand=+ repeatMasking=none	-0.918866
hg19_snp150Common_rs141094624 range=chr11:7907168-7907186 5'pad=9 3'pad=9 strand=+ repeatMasking=none	1.04523
hg19_snp150Common_rs147796139 range=chr11:94550348-94550366 5'pad=9 3'pad=9 strand=+ repeatMasking=none	1.78065
hg19_snp150Common_rs149214160 range=chr11:116030899-116030917 5'pad=9 3'pad=9 strand=+ repeatMasking=none	0.061074
hg19_snp150Common_rs1566733 range=chr11:48145609-48145627 5'pad=9 3'pad=9 strand=- repeatMasking=none	1.00789
hg19_snp150Common_rs17330399 range=chr11:10795116-10795134 5'pad=9 3'pad=9 strand=+ repeatMasking=none	-3.83676
hg19_snp150Common_rs182418610 range=chr11:25552410-25552428 5'pad=9 3'pad=9 strand=+ repeatMasking=none	1.15005
hg19_snp150Common_rs185182001 range=chr11:74766654-74766672 5'pad=9 3'pad=9 strand=+ repeatMasking=none	4.90017
hg19_snp150Common_rs186532912 range=chr11:67590774-67590792 5'pad=9 3'pad=9 strand=+ repeatMasking=none	-1.00935
hg19_snp150Common_rs1894122 range=chr11:56718756-56718774 5'pad=9 3'pad=9 strand=+ repeatMasking=none	1.15372
hg19_snp150Common_rs1916368 range=chr11:54824521-54824539 5'pad=9 3'pad=9 strand=+ repeatMasking=none	1.96866
hg19_snp150Common_rs200982128 range=chr11:4306856-4306874 5'pad=9 3'pad=9 strand=+ repeatMasking=none	0.376356
hg19_snp150Common_rs2054913 range=chr11:86990922-86990940 5'pad=9 3'pad=9 strand=- repeatMasking=none	3.67871
hg19_snp150Common_rs2288281 range=chr11:6565660-6565678 5'pad=9 3'pad=9 strand=- repeatMasking=none	-3.43025
hg19_snp150Common_rs2445148 range=chr11:18215178-18215196 5'pad=9 3'pad=9 strand=- repeatMasking=none	-0.501346
hg19_snp150Common_rs3017984 range=chr11:134495002-134495020 5'pad=9 3'pad=9 strand=+ repeatMasking=none	1.6163
hg19_snp150Common_rs34262161 range=chr11:12056127-12056145 5'pad=9 3'pad=9 strand=+ repeatMasking=none	1.35309
hg19_snp150Common_rs34420741 range=chr11:115048235-115048253 5'pad=9 3'pad=9 strand=+ repeatMasking=none	-0.551779
hg19_snp150Common_rs3862669 range=chr11:55655147-55655165 5'pad=9 3'pad=9 strand=+ repeatMasking=none	-0.055228
hg19_snp150Common_rs4121870 range=chr11:95150500-95150518 5'pad=9 3'pad=9 strand=+ repeatMasking=none	-1.21564
hg19_snp150Common_rs4754455 range=chr11:97855646-97855664 5'pad=9 3'pad=9 strand=+ repeatMasking=none	-0.277174
hg19_snp150Common_rs4756583 range=chr11:40220763-40220781 5'pad=9 3'pad=9 strand=+ repeatMasking=none	4.90765
hg19_snp150Common_rs4938809 range=chr11:120363928-120363946 5'pad=9 3'pad=9 strand=+ repeatMasking=none	-0.726147
hg19_snp150Common_rs57159059 range=chr11:45508674-45508692 5'pad=9 3'pad=9 strand=+ repeatMasking=none	-0.098117
hg19_snp150Common_rs57417127 range=chr11:59061635-59061653 5'pad=9 3'pad=9 strand=+ repeatMasking=none	-2.1448
hg19_snp150Common_rs597542 range=chr11:105748922-105748940 5'pad=9 3'pad=9 strand=+ repeatMasking=none	-2.1447
hg19_snp150Common_rs7109070 range=chr11:112263167-112263185 5'pad=9 3'pad=9 strand=+ repeatMasking=none	1.82729
hg19_snp150Common_rs7112350 range=chr11:58300745-58300763 5'pad=9 3'pad=9 strand=+ repeatMasking=none	-3.67297
hg19_snp150Common_rs72888503 range=chr11:25560158-25560176 5'pad=9 3'pad=9 strand=+ repeatMasking=none	-0.91122
hg19_snp150Common_rs73427022 range=chr11:4222246-4222264 5'pad=9 3'pad=9 strand=+ repeatMasking=none	-1.06433
hg19_snp150Common_rs74793966 range=chr11:16905208-16905226 5'pad=9 3'pad=9 strand=+ repeatMasking=none	0.167648
hg19_snp150Common_rs75715081 range=chr11:117117857-117117875 5'pad=9 3'pad=9 strand=+ repeatMasking=none	-0.787927
hg19_snp150Common_rs77308122 range=chr11:93988266-93988284 5'pad=9 3'pad=9 strand=+ repeatMasking=none	0.935292
hg19_snp150Common_rs77765727 range=chr11:25090212-25090230 5'pad=9 3'pad=9 strand=+ repeatMasking=none	1.63499
hg19_snp150Common_rs77781600 range=chr11:120243497-120243515 5'pad=9 3'pad=9 strand=+ repeatMasking=none	-1.2532
hg19_snp150Common_rs78055615 range=chr11:80136563-80136581 5'pad=9 3'pad=9 strand=+ repeatMasking=none	-1.22534
hg19_snp150Common_rs78842106 range=chr11:85795848-85795866 5'pad=9 3'pad=9 strand=+ repeatMasking=none	-0.440214
hg19_snp150Common_rs7934664 range=chr11:12423690-12423708 5'pad=9 3'pad=9 strand=+ repeatMasking=none	-0.062614
hg19_snp150Common_rs7939448 range=chr11:92879370-92879388 5'pad=9 3'pad=9 strand=+ repeatMasking=none	-1.08273
hg19_snp150Common_rs7949969 range=chr11:989272-989290 5'pad=9 3'pad=9 strand=- repeatMasking=none	2.82695
hg19_snp150Common_rs7950926 range=chr11:111776428-111776446 5'pad=9 3'pad=9 strand=+ repeatMasking=none	0.539116
hg19_snp150Common_rs895917 range=chr11:132169280-132169298 5'pad=9 3'pad=9 strand=+ repeatMasking=none	-0.063816
hg19_snp150Common_rs9633936 range=chr11:111139066-111139084 5'pad=9 3'pad=9 strand=+ repeatMasking=none	-2.08197
hg19_snp150Common_rs10744638 range=chr12:4360346-4360364 5'pad=9 3'pad=9 strand=+ repeatMasking=none	-0.856108
hg19_snp150Common_rs10778424 range=chr12:106089215-106089233 5'pad=9 3'pad=9 strand=+ repeatMasking=none	2.44378
hg19_snp150Common_rs10850570 range=chr12:116272778-116272796 5'pad=9 3'pad=9 strand=+ repeatMasking=none	1.47264
hg19_snp150Common_rs11050839 range=chr12:30498221-30498239 5'pad=9 3'pad=9 strand=+ repeatMasking=none	-1.04461
hg19_snp150Common_rs11062529 range=chr12:3255052-3255070 5'pad=9 3'pad=9 strand=+ repeatMasking=none	-1.2947
hg19_snp150Common_rs112189360 range=chr12:124340914-124340932 5'pad=9 3'pad=9 strand=+ repeatMasking=none	-1.14517
hg19_snp150Common_rs114861796 range=chr12:10020221-10020239 5'pad=9 3'pad=9 strand=+ repeatMasking=none	0.76107
hg19_snp150Common_rs11504503 range=chr12:38692415-38692433 5'pad=9 3'pad=9 strand=+ repeatMasking=none	-0.780734
hg19_snp150Common_rs117194373 range=chr12:21493413-21493431 5'pad=9 3'pad=9 strand=+ repeatMasking=none	-4.37048
hg19_snp150Common_rs1175594 range=chr12:77552058-77552076 5'pad=9 3'pad=9 strand=- repeatMasking=none	0.957018
hg19_snp150Common_rs117600782 range=chr12:130056812-130056830 5'pad=9 3'pad=9 strand=+ repeatMasking=none	-0.098383
hg19_snp150Common_rs118147913 range=chr12:96516411-96516429 5'pad=9 3'pad=9 strand=+ repeatMasking=none	1.44543
hg19_snp150Common_rs11831994 range=chr12:77672024-77672042 5'pad=9 3'pad=9 strand=+ repeatMasking=none	-0.882408
hg19_snp150Common_rs11837752 range=chr12:69986146-69986164 5'pad=9 3'pad=9 strand=+ repeatMasking=none	-0.354277
hg19_snp150Common_rs12315701 range=chr12:84087782-84087800 5'pad=9 3'pad=9 strand=+ repeatMasking=none	-3.29673
hg19_snp150Common_rs12813306 range=chr12:20866206-20866224 5'pad=9 3'pad=9 strand=+ repeatMasking=none	-2.08834
hg19_snp150Common_rs12826112 range=chr12:73555891-73555909 5'pad=9 3'pad=9 strand=+ repeatMasking=none	-2.97157
hg19_snp150Common_rs1284869 range=chr12:113506035-113506053 5'pad=9 3'pad=9 strand=- repeatMasking=none	7.58493
hg19_snp150Common_rs139380615 range=chr12:38076737-38076755 5'pad=9 3'pad=9 strand=+ repeatMasking=none	2.2998
hg19_snp150Common_rs143475098 range=chr12:34386968-34386986 5'pad=9 3'pad=9 strand=+ repeatMasking=none	-0.041561
hg19_snp150Common_rs145974647 range=chr12:103125943-103125961 5'pad=9 3'pad=9 strand=+ repeatMasking=none	1.14752
hg19_snp150Common_rs1479020 range=chr12:78327130-78327148 5'pad=9 3'pad=9 strand=- repeatMasking=none	-0.875493
hg19_snp150Common_rs150740792 range=chr12:114665229-114665247 5'pad=9 3'pad=9 strand=+ repeatMasking=none	2.16963
hg19_snp150Common_rs151337411 range=chr12:133813647-133813665 5'pad=9 3'pad=9 strand=+ repeatMasking=none	0.238568
hg19_snp150Common_rs1531227 range=chr12:688331-688349 5'pad=9 3'pad=9 strand=- repeatMasking=none	-1.68708
hg19_snp150Common_rs16929533 range=chr12:26008231-26008249 5'pad=9 3'pad=9 strand=+ repeatMasking=none	-1.35557
hg19_snp150Common_rs1704899 range=chr12:104983902-104983920 5'pad=9 3'pad=9 strand=+ repeatMasking=none	-1.28257
hg19_snp151Common_rs12307821 range=chr12:132662946-132662964 5'pad=9 3'pad=9 strand=+ repeatMasking=none	0.222644
hg19_snp150Common_rs2054451 range=chr12:44026287-44026305 5'pad=9 3'pad=9 strand=- repeatMasking=none	0.752166
hg19_snp150Common_rs2090758 range=chr12:73854579-73854597 5'pad=9 3'pad=9 strand=- repeatMasking=none	0.578725
hg19_snp150Common_rs225472 range=chr12:126460048-126460066 5'pad=9 3'pad=9 strand=- repeatMasking=none	-2.21546
hg19_snp150Common_rs377292843 range=chr12:132657027-132657045 5'pad=9 3'pad=9 strand=+ repeatMasking=none	-3.50679
hg19_snp150Common_rs4439597 range=chr12:33658847-33658865 5'pad=9 3'pad=9 strand=+ repeatMasking=none	0.047489
hg19_snp150Common_rs55742484 range=chr12:22466004-22466022 5'pad=9 3'pad=9 strand=+ repeatMasking=none	2.94032
hg19_snp150Common_rs55985768 range=chr12:106336021-106336039 5'pad=9 3'pad=9 strand=+ repeatMasking=none	-0.622775
hg19_snp150Common_rs56396658 range=chr12:83087465-83087483 5'pad=9 3'pad=9 strand=+ repeatMasking=none	-3.27593
hg19_snp150Common_rs5744865 range=chr12:133235796-133235814 5'pad=9 3'pad=9 strand=- repeatMasking=none	-2.90271
hg19_snp150Common_rs58338462 range=chr12:40050911-40050929 5'pad=9 3'pad=9 strand=+ repeatMasking=none	-1.51371
hg19_snp150Common_rs59554853 range=chr12:94299295-94299313 5'pad=9 3'pad=9 strand=+ repeatMasking=none	0.294137
hg19_snp150Common_rs61917373 range=chr12:9455333-9455351 5'pad=9 3'pad=9 strand=+ repeatMasking=none	2.61322
hg19_snp150Common_rs61931065 range=chr12:86391608-86391626 5'pad=9 3'pad=9 strand=+ repeatMasking=none	1.09431
hg19_snp150Common_rs71455211 range=chr12:53136823-53136841 5'pad=9 3'pad=9 strand=+ repeatMasking=none	-4.8271
hg19_snp150Common_rs71457676 range=chr12:33176555-33176573 5'pad=9 3'pad=9 strand=+ repeatMasking=none	-1.52922
hg19_snp150Common_rs7294423 range=chr12:54876850-54876868 5'pad=9 3'pad=9 strand=+ repeatMasking=none	0.446253
hg19_snp150Common_rs7297365 range=chr12:11561834-11561852 5'pad=9 3'pad=9 strand=+ repeatMasking=none	0.295233
hg19_snp150Common_rs7298825 range=chr12:128520188-128520206 5'pad=9 3'pad=9 strand=+ repeatMasking=none	0.598247
hg19_snp150Common_rs73029193 range=chr12:1403083-1403101 5'pad=9 3'pad=9 strand=+ repeatMasking=none	-0.107322
hg19_snp150Common_rs73256421 range=chr12:23584570-23584588 5'pad=9 3'pad=9 strand=+ repeatMasking=none	0.661036
hg19_snp150Common_rs73347802 range=chr12:80922370-80922388 5'pad=9 3'pad=9 strand=+ repeatMasking=none	-2.47012
hg19_snp150Common_rs74092350 range=chr12:55896561-55896579 5'pad=9 3'pad=9 strand=+ repeatMasking=none	-8.92025
hg19_snp150Common_rs74730608 range=chr12:12422852-12422870 5'pad=9 3'pad=9 strand=+ repeatMasking=none	0.598775
hg19_snp150Common_rs7488746 range=chr12:108254279-108254297 5'pad=9 3'pad=9 strand=+ repeatMasking=none	-3.55968
hg19_snp150Common_rs77595830 range=chr12:41559770-41559788 5'pad=9 3'pad=9 strand=+ repeatMasking=none	4.14836
hg19_snp150Common_rs79169963 range=chr12:47446951-47446969 5'pad=9 3'pad=9 strand=+ repeatMasking=none	1.3945
hg19_snp150Common_rs80147189 range=chr12:75835844-75835862 5'pad=9 3'pad=9 strand=+ repeatMasking=none	-3.23818
hg19_snp150Common_rs804448 range=chr12:119986125-119986143 5'pad=9 3'pad=9 strand=+ repeatMasking=none	-0.136381
hg19_snp150Common_rs9300190 range=chr12:29656300-29656318 5'pad=9 3'pad=9 strand=+ repeatMasking=none	0.62863

## Sheet: 3e_mPMAEs
SNP	Score		KRT SNP	Score	Count Less Than	p-value	Bonferroni-corrected p-value
hg19_snp151Common_rs76578074 range=chr12:169184-169202 5'pad=9 3'pad=9 strand=+ repeatMasking=none	-2.13443		chr12:53340591-53340609	-1.56479	104	0.104	1.456
hg19_snp151Common_rs59530692 range=chr12:229532-229550 5'pad=9 3'pad=9 strand=+ repeatMasking=none	1.51432		chr12:53344309-53344327	-1.02054	186	0.186	2.604
hg19_snp151Common_rs118157961 range=chr12:279730-279748 5'pad=9 3'pad=9 strand=+ repeatMasking=none	-2.7069		chr12:53346741-53346759	-0.161285	423	0.423	5.922
hg19_snp151Common_rs78101097 range=chr12:328719-328737 5'pad=9 3'pad=9 strand=+ repeatMasking=none	-1.15609		chr12:53351199-53351217	0.979552	772	0.772	10.808
hg19_snp151Common_rs12306188 range=chr12:424700-424718 5'pad=9 3'pad=9 strand=+ repeatMasking=none	-0.253138		chr12:53352563-53352581	-1.03753	181	0.181	2.534
hg19_snp151Common_rs35882350 range=chr12:623120-623138 5'pad=9 3'pad=9 strand=+ repeatMasking=none	1.13541		chr12:53353401-53353419	-0.969607	197	0.197	2.758
hg19_snp151Common_rs77353687 range=chr12:728360-728378 5'pad=9 3'pad=9 strand=+ repeatMasking=none	-1.01581		chr12:53353750-53353768	0.136738	540	0.54	7.56
hg19_snp151Common_rs7966632 range=chr12:903849-903867 5'pad=9 3'pad=9 strand=+ repeatMasking=none	-2.54985		chr12:53354613-53354631	-2.38438	43	0.043	0.602
hg19_snp151Common_rs16928264 range=chr12:1301225-1301243 5'pad=9 3'pad=9 strand=+ repeatMasking=none	-2.38831		chr12:53355548-53355566	-0.065004	455	0.455	6.37
hg19_snp151Common_rs7968604 range=chr12:1382173-1382191 5'pad=9 3'pad=9 strand=+ repeatMasking=none	-3.5679		chr12:53355670-53355688	0.617196	682	0.682	9.548
hg19_snp151Common_rs7297773 range=chr12:1423339-1423357 5'pad=9 3'pad=9 strand=+ repeatMasking=none	0.073882		chr12:53357326-53357344	-0.236704	402	0.402	5.628
hg19_snp151Common_rs11834069 range=chr12:1606696-1606714 5'pad=9 3'pad=9 strand=+ repeatMasking=none	-0.709268		chr12:53358025-53358043	0.827305	734	0.734	10.276
hg19_snp151Common_rs80100851 range=chr12:1663910-1663928 5'pad=9 3'pad=9 strand=+ repeatMasking=none	-1.73694		chr12:53359109-53359127	-0.187675	415	0.415	5.81
hg19_snp151Common_rs115873398 range=chr12:1734598-1734616 5'pad=9 3'pad=9 strand=+ repeatMasking=none	-1.54028		chr12:53360522-53360540	0.922743	759	0.759	10.626
hg19_snp151Common_rs148891284 range=chr12:1786695-1786713 5'pad=9 3'pad=9 strand=+ repeatMasking=none	0.290519
hg19_snp151Common_rs116283324 range=chr12:2088769-2088787 5'pad=9 3'pad=9 strand=+ repeatMasking=none	2.30781
hg19_snp151Common_rs115322336 range=chr12:2175686-2175704 5'pad=9 3'pad=9 strand=+ repeatMasking=none	0.333883
hg19_snp151Common_rs4126711 range=chr12:2227302-2227320 5'pad=9 3'pad=9 strand=- repeatMasking=none	0.117008
hg19_snp151Common_rs7974565 range=chr12:2271229-2271247 5'pad=9 3'pad=9 strand=+ repeatMasking=none	0.910306
hg19_snp151Common_rs114173791 range=chr12:2442746-2442764 5'pad=9 3'pad=9 strand=+ repeatMasking=none	0.566466
hg19_snp151Common_rs11062231 range=chr12:2552971-2552989 5'pad=9 3'pad=9 strand=+ repeatMasking=none	-0.650657
hg19_snp151Common_rs4765695 range=chr12:2648494-2648512 5'pad=9 3'pad=9 strand=+ repeatMasking=none	-0.640791
hg19_snp151Common_rs4394887 range=chr12:2649971-2649989 5'pad=9 3'pad=9 strand=+ repeatMasking=none	-1.34001
hg19_snp151Common_rs112699940 range=chr12:2698949-2698967 5'pad=9 3'pad=9 strand=+ repeatMasking=none	-0.984772
hg19_snp151Common_rs112108361 range=chr12:2734188-2734206 5'pad=9 3'pad=9 strand=+ repeatMasking=none	-2.30333
hg19_snp151Common_rs536704630 range=chr12:2755944-2755962 5'pad=9 3'pad=9 strand=+ repeatMasking=none	-0.570527
hg19_snp151Common_rs116690998 range=chr12:2890484-2890502 5'pad=9 3'pad=9 strand=+ repeatMasking=none	2.73846
hg19_snp151Common_rs10848736 range=chr12:3019478-3019496 5'pad=9 3'pad=9 strand=+ repeatMasking=none	3.9891
hg19_snp151Common_rs77692554 range=chr12:3122546-3122564 5'pad=9 3'pad=9 strand=+ repeatMasking=none	1.0221
hg19_snp151Common_rs11062460 range=chr12:3128446-3128464 5'pad=9 3'pad=9 strand=+ repeatMasking=none	-0.804177
hg19_snp151Common_rs10848779 range=chr12:3178499-3178517 5'pad=9 3'pad=9 strand=+ repeatMasking=none	-0.431345
hg19_snp151Common_rs10744596 range=chr12:3266480-3266498 5'pad=9 3'pad=9 strand=+ repeatMasking=none	0.224142
hg19_snp151Common_rs733851 range=chr12:3293834-3293852 5'pad=9 3'pad=9 strand=- repeatMasking=none	0.759115
hg19_snp151Common_rs61907328 range=chr12:3324408-3324426 5'pad=9 3'pad=9 strand=+ repeatMasking=none	0.513745
hg19_snp151Common_rs10774146 range=chr12:3530005-3530023 5'pad=9 3'pad=9 strand=+ repeatMasking=none	-0.203296
hg19_snp151Common_rs56347191 range=chr12:3617457-3617475 5'pad=9 3'pad=9 strand=+ repeatMasking=none	-0.715306
hg19_snp151Common_rs73047300 range=chr12:3783229-3783247 5'pad=9 3'pad=9 strand=+ repeatMasking=none	-0.672988
hg19_snp151Common_rs7980338 range=chr12:4351309-4351327 5'pad=9 3'pad=9 strand=+ repeatMasking=none	-2.61263
hg19_snp151Common_rs3217848 range=chr12:4396737-4396755 5'pad=9 3'pad=9 strand=+ repeatMasking=none	-0.519905
hg19_snp151Common_rs9737706 range=chr12:4428836-4428854 5'pad=9 3'pad=9 strand=+ repeatMasking=none	-0.089633
hg19_snp151Common_rs111632733 range=chr12:4450244-4450262 5'pad=9 3'pad=9 strand=+ repeatMasking=none	2.92478
hg19_snp151Common_rs2359249 range=chr12:4685435-4685453 5'pad=9 3'pad=9 strand=+ repeatMasking=none	-0.031208
hg19_snp151Common_rs150244543 range=chr12:4823490-4823508 5'pad=9 3'pad=9 strand=+ repeatMasking=none	-0.050573
hg19_snp151Common_rs114589167 range=chr12:5131115-5131133 5'pad=9 3'pad=9 strand=+ repeatMasking=none	2.80595
hg19_snp151Common_rs4415841 range=chr12:5376444-5376462 5'pad=9 3'pad=9 strand=+ repeatMasking=none	0.163152
hg19_snp151Common_rs1549036 range=chr12:5559371-5559389 5'pad=9 3'pad=9 strand=- repeatMasking=none	0.142757
hg19_snp151Common_rs10744691 range=chr12:5793102-5793120 5'pad=9 3'pad=9 strand=+ repeatMasking=none	1.16717
hg19_snp151Common_rs75161895 range=chr12:5863259-5863277 5'pad=9 3'pad=9 strand=+ repeatMasking=none	0.14837
hg19_snp151Common_rs7485896 range=chr12:5938437-5938455 5'pad=9 3'pad=9 strand=+ repeatMasking=none	0.173717
hg19_snp151Common_rs11063972 range=chr12:6093477-6093495 5'pad=9 3'pad=9 strand=+ repeatMasking=none	3.10976
hg19_snp151Common_rs75361962 range=chr12:6146122-6146140 5'pad=9 3'pad=9 strand=+ repeatMasking=none	-1.75797
hg19_snp151Common_rs12299007 range=chr12:6249287-6249305 5'pad=9 3'pad=9 strand=+ repeatMasking=none	-0.75869
hg19_snp151Common_rs753951308 range=chr12:6414638-6414656 5'pad=9 3'pad=9 strand=+ repeatMasking=none	0.144593
hg19_snp151Common_rs79284737 range=chr12:6504330-6504348 5'pad=9 3'pad=9 strand=+ repeatMasking=none	1.25373
hg19_snp151Common_rs73270520 range=chr12:7453520-7453538 5'pad=9 3'pad=9 strand=+ repeatMasking=none	0.502428
hg19_snp151Common_rs74717164 range=chr12:7546668-7546686 5'pad=9 3'pad=9 strand=+ repeatMasking=none	-0.059967
hg19_snp151Common_rs190548214 range=chr12:7751239-7751257 5'pad=9 3'pad=9 strand=+ repeatMasking=none	1.58939
hg19_snp151Common_rs11055158 range=chr12:7825126-7825144 5'pad=9 3'pad=9 strand=+ repeatMasking=none	-1.08401
hg19_snp151Common_rs4883438 range=chr12:7875291-7875309 5'pad=9 3'pad=9 strand=+ repeatMasking=none	1.1045
hg19_snp151Common_rs59456898 range=chr12:7948943-7948960 5'pad=9 3'pad=9 strand=+ repeatMasking=none	1.80468
hg19_snp151Common_rs113535859 range=chr12:8294851-8294869 5'pad=9 3'pad=9 strand=+ repeatMasking=none	0.23195
hg19_snp151Common_rs10770465 range=chr12:8460330-8460348 5'pad=9 3'pad=9 strand=+ repeatMasking=none	-1.31625
hg19_snp151Common_rs148514066 range=chr12:8539004-8539022 5'pad=9 3'pad=9 strand=+ repeatMasking=none	3.8785
hg19_snp151Common_rs4242893 range=chr12:8630920-8630938 5'pad=9 3'pad=9 strand=+ repeatMasking=none	-1.18895
hg19_snp151Common_rs7307228 range=chr12:8688066-8688084 5'pad=9 3'pad=9 strand=+ repeatMasking=none	1.24293
hg19_snp151Common_rs74741051 range=chr12:8709506-8709524 5'pad=9 3'pad=9 strand=+ repeatMasking=none	-0.395239
hg19_snp151Common_rs7313614 range=chr12:8875399-8875417 5'pad=9 3'pad=9 strand=+ repeatMasking=none	0.285485
hg19_snp151Common_rs73251237 range=chr12:8986446-8986464 5'pad=9 3'pad=9 strand=+ repeatMasking=none	-0.056511
hg19_snp151Common_rs2058428 range=chr12:9747504-9747522 5'pad=9 3'pad=9 strand=- repeatMasking=none	-0.060636
hg19_snp151Common_rs17732655 range=chr12:9752088-9752106 5'pad=9 3'pad=9 strand=+ repeatMasking=none	-0.340615
hg19_snp151Common_rs10844269 range=chr12:9796862-9796880 5'pad=9 3'pad=9 strand=+ repeatMasking=none	-0.343243
hg19_snp151Common_rs75257215 range=chr12:9843968-9843986 5'pad=9 3'pad=9 strand=+ repeatMasking=none	2.44122
hg19_snp151Common_rs12371981 range=chr12:9856433-9856451 5'pad=9 3'pad=9 strand=+ repeatMasking=none	2.00411
hg19_snp151Common_rs776127859 range=chr12:9960717-9960735 5'pad=9 3'pad=9 strand=+ repeatMasking=none	-0.282703
hg19_snp151Common_rs79254621 range=chr12:10431099-10431117 5'pad=9 3'pad=9 strand=+ repeatMasking=none	2.15077
hg19_snp151Common_rs74821572 range=chr12:10496133-10496151 5'pad=9 3'pad=9 strand=+ repeatMasking=none	-0.38977
hg19_snp151Common_rs10772323 range=chr12:10733690-10733708 5'pad=9 3'pad=9 strand=+ repeatMasking=none	0.302232
hg19_snp151Common_rs34964378 range=chr12:10785509-10785526 5'pad=9 3'pad=9 strand=+ repeatMasking=none	-1.10912
hg19_snp151Common_rs4763569 range=chr12:10792320-10792338 5'pad=9 3'pad=9 strand=+ repeatMasking=none	0.874311
hg19_snp151Common_rs78381270 range=chr12:10840165-10840183 5'pad=9 3'pad=9 strand=+ repeatMasking=none	1.91627
hg19_snp151Common_rs73046589 range=chr12:10944113-10944131 5'pad=9 3'pad=9 strand=+ repeatMasking=none	0.110235
hg19_snp151Common_rs11054088 range=chr12:11115517-11115535 5'pad=9 3'pad=9 strand=+ repeatMasking=none	-0.07428
hg19_snp151Common_rs10772405 range=chr12:11145817-11145835 5'pad=9 3'pad=9 strand=+ repeatMasking=none	-1.47326
hg19_snp151Common_rs777303558 range=chr12:11214486-11214504 5'pad=9 3'pad=9 strand=+ repeatMasking=none	0.110012
hg19_snp151Common_rs114788163 range=chr12:11550356-11550374 5'pad=9 3'pad=9 strand=+ repeatMasking=none	-1.42636
hg19_snp151Common_rs73056812 range=chr12:11609568-11609586 5'pad=9 3'pad=9 strand=+ repeatMasking=none	2.14912
hg19_snp151Common_rs12831430 range=chr12:11620585-11620603 5'pad=9 3'pad=9 strand=+ repeatMasking=none	-0.61286
hg19_snp151Common_rs141655374 range=chr12:11692584-11692602 5'pad=9 3'pad=9 strand=+ repeatMasking=none	-0.236126
hg19_snp151Common_rs12300254 range=chr12:11755099-11755117 5'pad=9 3'pad=9 strand=+ repeatMasking=none	1.1054
hg19_snp151Common_rs60711165 range=chr12:11860682-11860700 5'pad=9 3'pad=9 strand=+ repeatMasking=none	0.084403
hg19_snp151Common_rs10772501 range=chr12:11877264-11877282 5'pad=9 3'pad=9 strand=+ repeatMasking=none	1.10558
hg19_snp151Common_rs17745932 range=chr12:11893148-11893166 5'pad=9 3'pad=9 strand=+ repeatMasking=none	1.61108
hg19_snp151Common_rs12229652 range=chr12:12102103-12102121 5'pad=9 3'pad=9 strand=+ repeatMasking=none	-0.50326
hg19_snp151Common_rs1641729 range=chr12:12251143-12251161 5'pad=9 3'pad=9 strand=+ repeatMasking=none	-0.684796
hg19_snp151Common_rs6488517 range=chr12:12515057-12515075 5'pad=9 3'pad=9 strand=+ repeatMasking=none	0.504398
hg19_snp151Common_rs114270120 range=chr12:12606709-12606727 5'pad=9 3'pad=9 strand=+ repeatMasking=none	1.451
hg19_snp151Common_rs10845558 range=chr12:12642326-12642344 5'pad=9 3'pad=9 strand=+ repeatMasking=none	3.33879
hg19_snp151Common_rs1291356 range=chr12:13157931-13157949 5'pad=9 3'pad=9 strand=- repeatMasking=none	-1.2434
hg19_snp151Common_rs12427224 range=chr12:13267694-13267712 5'pad=9 3'pad=9 strand=+ repeatMasking=none	1.06496
hg19_snp151Common_rs6488590 range=chr12:13288837-13288855 5'pad=9 3'pad=9 strand=+ repeatMasking=none	-0.066972
hg19_snp151Common_rs75099364 range=chr12:13310549-13310567 5'pad=9 3'pad=9 strand=+ repeatMasking=none	-0.502789
hg19_snp151Common_rs7968135 range=chr12:13344973-13344991 5'pad=9 3'pad=9 strand=+ repeatMasking=none	0.117281
hg19_snp151Common_rs879111 range=chr12:13410258-13410276 5'pad=9 3'pad=9 strand=- repeatMasking=none	1.87304
hg19_snp151Common_rs10772657 range=chr12:13503872-13503890 5'pad=9 3'pad=9 strand=+ repeatMasking=none	0.09193
hg19_snp151Common_rs7308685 range=chr12:13526296-13526314 5'pad=9 3'pad=9 strand=+ repeatMasking=none	0.082138
hg19_snp151Common_rs4763343 range=chr12:13564953-13564971 5'pad=9 3'pad=9 strand=+ repeatMasking=none	0.069047
hg19_snp151Common_rs7970407 range=chr12:13876841-13876859 5'pad=9 3'pad=9 strand=+ repeatMasking=none	-1.10367
hg19_snp151Common_rs116317074 range=chr12:13886985-13887003 5'pad=9 3'pad=9 strand=+ repeatMasking=none	0.205423
hg19_snp151Common_rs73055672 range=chr12:13995224-13995242 5'pad=9 3'pad=9 strand=+ repeatMasking=none	-0.50763
hg19_snp151Common_rs73296763 range=chr12:14024149-14024167 5'pad=9 3'pad=9 strand=+ repeatMasking=none	1.97467
hg19_snp151Common_rs61921177 range=chr12:14216587-14216605 5'pad=9 3'pad=9 strand=+ repeatMasking=none	1.52755
hg19_snp151Common_rs150055605 range=chr12:14233002-14233020 5'pad=9 3'pad=9 strand=+ repeatMasking=none	0.217568
hg19_snp151Common_rs7958962 range=chr12:14265643-14265661 5'pad=9 3'pad=9 strand=+ repeatMasking=none	-0.024743
hg19_snp151Common_rs12368467 range=chr12:14289737-14289755 5'pad=9 3'pad=9 strand=+ repeatMasking=none	1.43589
hg19_snp151Common_rs149070299 range=chr12:14533764-14533782 5'pad=9 3'pad=9 strand=+ repeatMasking=none	-0.695792
hg19_snp151Common_rs111695839 range=chr12:14770958-14770976 5'pad=9 3'pad=9 strand=+ repeatMasking=none	-0.051409
hg19_snp151Common_rs11056067 range=chr12:14776552-14776570 5'pad=9 3'pad=9 strand=+ repeatMasking=none	0.92905
hg19_snp151Common_rs7296937 range=chr12:14786402-14786420 5'pad=9 3'pad=9 strand=+ repeatMasking=none	1.97519
hg19_snp151Common_rs17834491 range=chr12:14963331-14963349 5'pad=9 3'pad=9 strand=+ repeatMasking=none	-0.129318
hg19_snp151Common_rs12305613 range=chr12:15077211-15077229 5'pad=9 3'pad=9 strand=+ repeatMasking=none	-0.534126
hg19_snp151Common_rs16910453 range=chr12:15129382-15129400 5'pad=9 3'pad=9 strand=+ repeatMasking=none	-3.58514
hg19_snp151Common_rs7301508 range=chr12:15135222-15135240 5'pad=9 3'pad=9 strand=+ repeatMasking=none	0.450643
hg19_snp151Common_rs78231610 range=chr12:15144702-15144720 5'pad=9 3'pad=9 strand=+ repeatMasking=none	0.950411
hg19_snp151Common_rs34639088 range=chr12:15223678-15223696 5'pad=9 3'pad=9 strand=+ repeatMasking=none	-2.04707
hg19_snp151Common_rs28444248 range=chr12:15259011-15259029 5'pad=9 3'pad=9 strand=+ repeatMasking=none	-0.303623
hg19_snp151Common_rs117772953 range=chr12:15339534-15339552 5'pad=9 3'pad=9 strand=+ repeatMasking=none	0.769992
hg19_snp151Common_rs73301699 range=chr12:15540995-15541013 5'pad=9 3'pad=9 strand=+ repeatMasking=none	1.41881
hg19_snp151Common_rs80279996 range=chr12:15820137-15820155 5'pad=9 3'pad=9 strand=+ repeatMasking=none	-2.04825
hg19_snp151Common_rs201711567 range=chr12:15928539-15928556 5'pad=9 3'pad=9 strand=+ repeatMasking=none	1.06018
hg19_snp151Common_rs113432196 range=chr12:15966067-15966085 5'pad=9 3'pad=9 strand=+ repeatMasking=none	-0.91058
hg19_snp151Common_rs34785407 range=chr12:16357433-16357451 5'pad=9 3'pad=9 strand=+ repeatMasking=none	1.81944
hg19_snp151Common_rs11056885 range=chr12:16484939-16484957 5'pad=9 3'pad=9 strand=+ repeatMasking=none	1.92146
hg19_snp151Common_rs75932174 range=chr12:16736225-16736243 5'pad=9 3'pad=9 strand=+ repeatMasking=none	0.280746
hg19_snp151Common_rs10846445 range=chr12:16977467-16977485 5'pad=9 3'pad=9 strand=+ repeatMasking=none	0.08084
hg19_snp151Common_rs150531042 range=chr12:17272119-17272137 5'pad=9 3'pad=9 strand=+ repeatMasking=none	0.003108
hg19_snp151Common_rs142395769 range=chr12:17364685-17364703 5'pad=9 3'pad=9 strand=+ repeatMasking=none	1.2359
hg19_snp151Common_rs10840723 range=chr12:17630197-17630215 5'pad=9 3'pad=9 strand=+ repeatMasking=none	1.5285
hg19_snp151Common_rs4764346 range=chr12:17868533-17868551 5'pad=9 3'pad=9 strand=+ repeatMasking=none	1.97426
hg19_snp151Common_rs12813320 range=chr12:17884767-17884785 5'pad=9 3'pad=9 strand=+ repeatMasking=none	-0.179811
hg19_snp151Common_rs35328981 range=chr12:17907775-17907792 5'pad=9 3'pad=9 strand=+ repeatMasking=none	-1.17555
hg19_snp151Common_rs151332178 range=chr12:18085650-18085668 5'pad=9 3'pad=9 strand=+ repeatMasking=none	-0.06137
hg19_snp151Common_rs78558982 range=chr12:18134223-18134241 5'pad=9 3'pad=9 strand=+ repeatMasking=none	-0.747773
hg19_snp151Common_rs118001010 range=chr12:18388709-18388727 5'pad=9 3'pad=9 strand=+ repeatMasking=none	0.573222
hg19_snp151Common_rs78426992 range=chr12:18553211-18553229 5'pad=9 3'pad=9 strand=+ repeatMasking=none	0.666656
hg19_snp151Common_rs74070259 range=chr12:18570933-18570951 5'pad=9 3'pad=9 strand=+ repeatMasking=none	0.0415
hg19_snp151Common_rs732669 range=chr12:18607695-18607713 5'pad=9 3'pad=9 strand=+ repeatMasking=none	-1.57188
hg19_snp151Common_rs34743372 range=chr12:18634025-18634043 5'pad=9 3'pad=9 strand=+ repeatMasking=none	-0.756663
hg19_snp151Common_rs74070280 range=chr12:18638254-18638272 5'pad=9 3'pad=9 strand=+ repeatMasking=none	-0.395348
hg19_snp151Common_rs668502 range=chr12:18811679-18811697 5'pad=9 3'pad=9 strand=+ repeatMasking=none	1.48924
hg19_snp151Common_rs117168184 range=chr12:18856747-18856765 5'pad=9 3'pad=9 strand=+ repeatMasking=none	0.431343
hg19_snp151Common_rs76831606 range=chr12:19022568-19022586 5'pad=9 3'pad=9 strand=+ repeatMasking=none	-1.7054
hg19_snp151Common_rs76466093 range=chr12:19118347-19118365 5'pad=9 3'pad=9 strand=+ repeatMasking=none	-2.82632
hg19_snp151Common_rs148121190 range=chr12:19469362-19469379 5'pad=9 3'pad=9 strand=+ repeatMasking=none	0.663914
hg19_snp151Common_rs7296155 range=chr12:19679386-19679404 5'pad=9 3'pad=9 strand=+ repeatMasking=none	-0.249286
hg19_snp151Common_rs11611955 range=chr12:19934310-19934328 5'pad=9 3'pad=9 strand=+ repeatMasking=none	-3.57549
hg19_snp151Common_rs1918279 range=chr12:19935551-19935569 5'pad=9 3'pad=9 strand=+ repeatMasking=none	1.09473
hg19_snp151Common_rs6487052 range=chr12:20065487-20065505 5'pad=9 3'pad=9 strand=+ repeatMasking=none	-0.501178
hg19_snp151Common_rs10841408 range=chr12:20076282-20076300 5'pad=9 3'pad=9 strand=+ repeatMasking=none	-0.182113
hg19_snp151Common_rs2728637 range=chr12:20128203-20128221 5'pad=9 3'pad=9 strand=- repeatMasking=none	0.942862
hg19_snp151Common_rs4762911 range=chr12:20160737-20160755 5'pad=9 3'pad=9 strand=+ repeatMasking=none	2.71052
hg19_snp151Common_rs55701131 range=chr12:20251030-20251048 5'pad=9 3'pad=9 strand=+ repeatMasking=none	0.557325
hg19_snp151Common_rs74508296 range=chr12:20387024-20387042 5'pad=9 3'pad=9 strand=+ repeatMasking=none	-0.324651
hg19_snp151Common_rs77801890 range=chr12:20461621-20461639 5'pad=9 3'pad=9 strand=+ repeatMasking=none	-0.127774
hg19_snp151Common_rs10743365 range=chr12:20526550-20526568 5'pad=9 3'pad=9 strand=+ repeatMasking=none	0.314626
hg19_snp151Common_rs60593141 range=chr12:20531325-20531343 5'pad=9 3'pad=9 strand=+ repeatMasking=none	0.454311
hg19_snp151Common_rs117429885 range=chr12:20590054-20590072 5'pad=9 3'pad=9 strand=+ repeatMasking=none	-0.091086
hg19_snp151Common_rs59022244 range=chr12:20805354-20805372 5'pad=9 3'pad=9 strand=+ repeatMasking=none	2.25608
hg19_snp151Common_rs11045524 range=chr12:20965780-20965798 5'pad=9 3'pad=9 strand=+ repeatMasking=none	-2.97504
hg19_snp151Common_rs12317610 range=chr12:20970773-20970791 5'pad=9 3'pad=9 strand=+ repeatMasking=none	-0.411493
hg19_snp151Common_rs4387401 range=chr12:21006706-21006724 5'pad=9 3'pad=9 strand=+ repeatMasking=none	-2.26195
hg19_snp151Common_rs143746605 range=chr12:21183710-21183728 5'pad=9 3'pad=9 strand=+ repeatMasking=none	1.81536
hg19_snp151Common_rs7311343 range=chr12:21228772-21228790 5'pad=9 3'pad=9 strand=+ repeatMasking=none	-0.273724
hg19_snp151Common_rs73241801 range=chr12:21242992-21243010 5'pad=9 3'pad=9 strand=+ repeatMasking=none	-0.244089
hg19_snp151Common_rs75924117 range=chr12:21294791-21294809 5'pad=9 3'pad=9 strand=+ repeatMasking=none	1.5836
hg19_snp151Common_rs7136445 range=chr12:21324739-21324757 5'pad=9 3'pad=9 strand=+ repeatMasking=none	1.64983
hg19_snp151Common_rs144019604 range=chr12:21407201-21407219 5'pad=9 3'pad=9 strand=+ repeatMasking=none	0.57757
hg19_snp151Common_rs10841786 range=chr12:21443273-21443291 5'pad=9 3'pad=9 strand=+ repeatMasking=none	-0.614617
hg19_snp151Common_rs10841827 range=chr12:21621808-21621826 5'pad=9 3'pad=9 strand=+ repeatMasking=none	1.61741
hg19_snp151Common_rs1580300 range=chr12:21701141-21701159 5'pad=9 3'pad=9 strand=- repeatMasking=none	0.693059
hg19_snp151Common_rs16924062 range=chr12:21768200-21768218 5'pad=9 3'pad=9 strand=+ repeatMasking=none	0.473433
hg19_snp151Common_rs4148680 range=chr12:21958990-21959008 5'pad=9 3'pad=9 strand=- repeatMasking=none	0.274209
hg19_snp151Common_rs77732183 range=chr12:22003031-22003049 5'pad=9 3'pad=9 strand=+ repeatMasking=none	-0.878195
hg19_snp151Common_rs704210 range=chr12:22043860-22043878 5'pad=9 3'pad=9 strand=- repeatMasking=none	0.167034
hg19_snp151Common_rs9706519 range=chr12:22187403-22187421 5'pad=9 3'pad=9 strand=+ repeatMasking=none	-0.732523
hg19_snp151Common_rs200304101 range=chr12:22346681-22346699 5'pad=9 3'pad=9 strand=+ repeatMasking=none	1.09153
hg19_snp151Common_rs140675748 range=chr12:22421549-22421566 5'pad=9 3'pad=9 strand=+ repeatMasking=none	-0.529701
hg19_snp151Common_rs7970824 range=chr12:22482429-22482447 5'pad=9 3'pad=9 strand=+ repeatMasking=none	-0.166042
hg19_snp151Common_rs6487311 range=chr12:22687074-22687092 5'pad=9 3'pad=9 strand=+ repeatMasking=none	-1.36908
hg19_snp151Common_rs73082538 range=chr12:22851547-22851565 5'pad=9 3'pad=9 strand=+ repeatMasking=none	0.095878
hg19_snp151Common_rs73269352 range=chr12:23017791-23017809 5'pad=9 3'pad=9 strand=+ repeatMasking=none	0.090469
hg19_snp151Common_rs2141567 range=chr12:23250925-23250943 5'pad=9 3'pad=9 strand=- repeatMasking=none	1.7631
hg19_snp151Common_rs2446028 range=chr12:23253232-23253250 5'pad=9 3'pad=9 strand=+ repeatMasking=none	-1.25753
hg19_snp151Common_rs79429474 range=chr12:23312727-23312745 5'pad=9 3'pad=9 strand=+ repeatMasking=none	0.502274
hg19_snp151Common_rs59801278 range=chr12:23366449-23366467 5'pad=9 3'pad=9 strand=+ repeatMasking=none	0.339516
hg19_snp151Common_rs4520640 range=chr12:23433451-23433469 5'pad=9 3'pad=9 strand=+ repeatMasking=none	0.600689
hg19_snp151Common_rs75591463 range=chr12:23446291-23446309 5'pad=9 3'pad=9 strand=+ repeatMasking=none	2.23899
hg19_snp151Common_rs10734725 range=chr12:23573827-23573845 5'pad=9 3'pad=9 strand=+ repeatMasking=none	1.83004
hg19_snp151Common_rs145763863 range=chr12:23673998-23674016 5'pad=9 3'pad=9 strand=+ repeatMasking=none	0.153279
hg19_snp151Common_rs117141304 range=chr12:23824355-23824373 5'pad=9 3'pad=9 strand=+ repeatMasking=none	-3.2246
hg19_snp151Common_rs11833903 range=chr12:23862682-23862700 5'pad=9 3'pad=9 strand=+ repeatMasking=none	0.46359
hg19_snp151Common_rs116241957 range=chr12:23892431-23892449 5'pad=9 3'pad=9 strand=+ repeatMasking=none	2.50725
hg19_snp151Common_rs111592523 range=chr12:23984439-23984457 5'pad=9 3'pad=9 strand=+ repeatMasking=none	2.68056
hg19_snp151Common_rs12319752 range=chr12:23985689-23985707 5'pad=9 3'pad=9 strand=+ repeatMasking=none	-0.756356
hg19_snp151Common_rs10505913 range=chr12:24043641-24043659 5'pad=9 3'pad=9 strand=+ repeatMasking=none	0.021202
hg19_snp151Common_rs10505931 range=chr12:24194786-24194804 5'pad=9 3'pad=9 strand=+ repeatMasking=none	-0.006494
hg19_snp151Common_rs117907734 range=chr12:24244961-24244979 5'pad=9 3'pad=9 strand=+ repeatMasking=none	0.048076
hg19_snp151Common_rs35157827 range=chr12:24437452-24437470 5'pad=9 3'pad=9 strand=+ repeatMasking=none	-1.52773
hg19_snp151Common_rs114018973 range=chr12:24467639-24467657 5'pad=9 3'pad=9 strand=+ repeatMasking=none	0.473671
hg19_snp151Common_rs4963786 range=chr12:24887282-24887300 5'pad=9 3'pad=9 strand=+ repeatMasking=none	1.82241
hg19_snp151Common_rs79130412 range=chr12:24939915-24939933 5'pad=9 3'pad=9 strand=+ repeatMasking=none	0.596154
hg19_snp151Common_rs147064884 range=chr12:25012363-25012381 5'pad=9 3'pad=9 strand=+ repeatMasking=none	1.49207
hg19_snp151Common_rs699033 range=chr12:25151218-25151236 5'pad=9 3'pad=9 strand=+ repeatMasking=none	-0.095643
hg19_snp151Common_rs35755130 range=chr12:25435516-25435534 5'pad=9 3'pad=9 strand=+ repeatMasking=none	-0.195564
hg19_snp151Common_rs143518652 range=chr12:25576234-25576252 5'pad=9 3'pad=9 strand=+ repeatMasking=none	-1.01489
hg19_snp151Common_rs74073907 range=chr12:25593769-25593787 5'pad=9 3'pad=9 strand=+ repeatMasking=none	0.606712
hg19_snp151Common_rs34944742 range=chr12:25608862-25608880 5'pad=9 3'pad=9 strand=+ repeatMasking=none	-1.03637
hg19_snp151Common_rs73287214 range=chr12:26013886-26013904 5'pad=9 3'pad=9 strand=+ repeatMasking=none	-2.55645
hg19_snp151Common_rs11048312 range=chr12:26024417-26024435 5'pad=9 3'pad=9 strand=+ repeatMasking=none	0.059457
hg19_snp151Common_rs2198589 range=chr12:26029303-26029321 5'pad=9 3'pad=9 strand=+ repeatMasking=none	-1.55629
hg19_snp151Common_rs10505985 range=chr12:26035833-26035851 5'pad=9 3'pad=9 strand=+ repeatMasking=none	2.24168
hg19_snp151Common_rs55768874 range=chr12:26074562-26074580 5'pad=9 3'pad=9 strand=+ repeatMasking=none	-0.065192
hg19_snp151Common_rs6487520 range=chr12:26116585-26116603 5'pad=9 3'pad=9 strand=+ repeatMasking=none	-1.3815
hg19_snp151Common_rs114238638 range=chr12:26326358-26326376 5'pad=9 3'pad=9 strand=+ repeatMasking=none	0.812342
hg19_snp151Common_rs2063632 range=chr12:26511759-26511777 5'pad=9 3'pad=9 strand=- repeatMasking=none	2.31771
hg19_snp151Common_rs12826706 range=chr12:26639552-26639570 5'pad=9 3'pad=9 strand=+ repeatMasking=none	-0.015753
hg19_snp151Common_rs76956075 range=chr12:26857756-26857774 5'pad=9 3'pad=9 strand=+ repeatMasking=none	-1.20658
hg19_snp151Common_rs113702245 range=chr12:27001998-27002016 5'pad=9 3'pad=9 strand=+ repeatMasking=none	-2.50585
hg19_snp151Common_rs12318803 range=chr12:27023788-27023806 5'pad=9 3'pad=9 strand=+ repeatMasking=none	0.082669
hg19_snp151Common_rs841612 range=chr12:27289478-27289496 5'pad=9 3'pad=9 strand=- repeatMasking=none	-2.61255
hg19_snp151Common_rs149037992 range=chr12:27292471-27292489 5'pad=9 3'pad=9 strand=+ repeatMasking=none	3.10341
hg19_snp151Common_rs12311660 range=chr12:27517832-27517850 5'pad=9 3'pad=9 strand=+ repeatMasking=none	2.68414
hg19_snp151Common_rs68168722 range=chr12:27701039-27701057 5'pad=9 3'pad=9 strand=+ repeatMasking=none	-2.47811
hg19_snp151Common_rs139359429 range=chr12:27837294-27837312 5'pad=9 3'pad=9 strand=+ repeatMasking=none	1.4311
hg19_snp151Common_rs11049187 range=chr12:27990488-27990506 5'pad=9 3'pad=9 strand=+ repeatMasking=none	1.58521
hg19_snp151Common_rs10843151 range=chr12:28471310-28471328 5'pad=9 3'pad=9 strand=+ repeatMasking=none	-1.41111
hg19_snp151Common_rs111230494 range=chr12:28486986-28487004 5'pad=9 3'pad=9 strand=+ repeatMasking=none	-0.361351
hg19_snp151Common_rs11049736 range=chr12:28761348-28761366 5'pad=9 3'pad=9 strand=+ repeatMasking=none	-0.783308
hg19_snp151Common_rs76444125 range=chr12:28773533-28773551 5'pad=9 3'pad=9 strand=+ repeatMasking=none	-0.341182
hg19_snp151Common_rs79112152 range=chr12:29136145-29136163 5'pad=9 3'pad=9 strand=+ repeatMasking=none	0.445697
hg19_snp151Common_rs12311115 range=chr12:29203476-29203494 5'pad=9 3'pad=9 strand=+ repeatMasking=none	-3.0105
hg19_snp151Common_rs78465465 range=chr12:29262709-29262727 5'pad=9 3'pad=9 strand=+ repeatMasking=none	-2.36288
hg19_snp151Common_rs12305429 range=chr12:29283273-29283291 5'pad=9 3'pad=9 strand=+ repeatMasking=none	-0.236697
hg19_snp151Common_rs11050068 range=chr12:29283523-29283541 5'pad=9 3'pad=9 strand=+ repeatMasking=none	-0.381012
hg19_snp151Common_rs7978770 range=chr12:29567336-29567354 5'pad=9 3'pad=9 strand=+ repeatMasking=none	0.69549
hg19_snp151Common_rs7301491 range=chr12:29689574-29689592 5'pad=9 3'pad=9 strand=+ repeatMasking=none	-0.766629
hg19_snp151Common_rs11050288 range=chr12:29723319-29723337 5'pad=9 3'pad=9 strand=+ repeatMasking=none	-1.31377
hg19_snp151Common_rs114153207 range=chr12:29849575-29849593 5'pad=9 3'pad=9 strand=+ repeatMasking=none	0.554615
hg19_snp151Common_rs118044885 range=chr12:29924707-29924725 5'pad=9 3'pad=9 strand=+ repeatMasking=none	0.867271
hg19_snp151Common_rs12229602 range=chr12:30030700-30030718 5'pad=9 3'pad=9 strand=+ repeatMasking=none	1.50467
hg19_snp151Common_rs73279088 range=chr12:30034481-30034499 5'pad=9 3'pad=9 strand=+ repeatMasking=none	-0.043204
hg19_snp151Common_rs12821646 range=chr12:30144191-30144209 5'pad=9 3'pad=9 strand=+ repeatMasking=none	-0.222172
hg19_snp151Common_rs147150895 range=chr12:30210350-30210368 5'pad=9 3'pad=9 strand=+ repeatMasking=none	0.135519
hg19_snp151Common_rs1652143 range=chr12:30418629-30418647 5'pad=9 3'pad=9 strand=- repeatMasking=none	0.295996
hg19_snp151Common_rs4143645 range=chr12:30431543-30431561 5'pad=9 3'pad=9 strand=+ repeatMasking=none	-1.27008
hg19_snp151Common_rs11835199 range=chr12:30449690-30449708 5'pad=9 3'pad=9 strand=+ repeatMasking=none	-0.517323
hg19_snp151Common_rs16906306 range=chr12:30518098-30518116 5'pad=9 3'pad=9 strand=+ repeatMasking=none	-0.977635
hg19_snp151Common_rs11832986 range=chr12:30546624-30546642 5'pad=9 3'pad=9 strand=+ repeatMasking=none	4.35378
hg19_snp151Common_rs34256685 range=chr12:30611508-30611526 5'pad=9 3'pad=9 strand=+ repeatMasking=none	-0.562091
hg19_snp151Common_rs59222301 range=chr12:30626020-30626038 5'pad=9 3'pad=9 strand=+ repeatMasking=none	1.27421
hg19_snp151Common_rs11532276 range=chr12:30758565-30758583 5'pad=9 3'pad=9 strand=+ repeatMasking=none	0.193076
hg19_snp151Common_rs73088047 range=chr12:31102766-31102784 5'pad=9 3'pad=9 strand=+ repeatMasking=none	2.72666
hg19_snp151Common_rs10771791 range=chr12:31171554-31171572 5'pad=9 3'pad=9 strand=+ repeatMasking=none	1.42541
hg19_snp151Common_rs10771798 range=chr12:31223313-31223331 5'pad=9 3'pad=9 strand=+ repeatMasking=none	-1.35185
hg19_snp151Common_rs4081649 range=chr12:31242223-31242241 5'pad=9 3'pad=9 strand=+ repeatMasking=none	-3.14326
hg19_snp151Common_rs28460499 range=chr12:31284242-31284260 5'pad=9 3'pad=9 strand=+ repeatMasking=none	-1.98385
hg19_snp151Common_rs4931481 range=chr12:31503743-31503761 5'pad=9 3'pad=9 strand=+ repeatMasking=none	0.504678
hg19_snp151Common_rs144107679 range=chr12:31955679-31955697 5'pad=9 3'pad=9 strand=+ repeatMasking=none	-0.010153
hg19_snp151Common_rs141482833 range=chr12:32179353-32179371 5'pad=9 3'pad=9 strand=+ repeatMasking=none	-2.78378
hg19_snp151Common_rs2668290 range=chr12:32281195-32281213 5'pad=9 3'pad=9 strand=- repeatMasking=none	1.38133
hg19_snp151Common_rs111936901 range=chr12:32342903-32342921 5'pad=9 3'pad=9 strand=+ repeatMasking=none	-5.71332
hg19_snp151Common_rs16919774 range=chr12:32502496-32502514 5'pad=9 3'pad=9 strand=+ repeatMasking=none	1.08114
hg19_snp151Common_rs190853580 range=chr12:32626243-32626261 5'pad=9 3'pad=9 strand=+ repeatMasking=none	1.05892
hg19_snp151Common_rs74073064 range=chr12:32821170-32821188 5'pad=9 3'pad=9 strand=+ repeatMasking=none	-0.09057
hg19_snp151Common_rs141040674 range=chr12:32935038-32935056 5'pad=9 3'pad=9 strand=+ repeatMasking=none	0.551024
hg19_snp151Common_rs56033839 range=chr12:32970111-32970129 5'pad=9 3'pad=9 strand=+ repeatMasking=none	2.54177
hg19_snp151Common_rs143525894 range=chr12:32994252-32994269 5'pad=9 3'pad=9 strand=+ repeatMasking=none	-0.395854
hg19_snp151Common_rs11052297 range=chr12:33063489-33063507 5'pad=9 3'pad=9 strand=+ repeatMasking=none	-3.39186
hg19_snp151Common_rs17622297 range=chr12:33086173-33086191 5'pad=9 3'pad=9 strand=+ repeatMasking=none	2.63177
hg19_snp151Common_rs61927344 range=chr12:33109008-33109026 5'pad=9 3'pad=9 strand=+ repeatMasking=none	0.097564
hg19_snp151Common_rs59411863 range=chr12:33280841-33280859 5'pad=9 3'pad=9 strand=+ repeatMasking=none	0.316115
hg19_snp151Common_rs538680885 range=chr12:33417398-33417416 5'pad=9 3'pad=9 strand=+ repeatMasking=none	0.938856
hg19_snp151Common_rs11052707 range=chr12:33589379-33589397 5'pad=9 3'pad=9 strand=+ repeatMasking=none	1.20041
hg19_snp151Common_rs7296424 range=chr12:33809888-33809906 5'pad=9 3'pad=9 strand=+ repeatMasking=none	-1.41896
hg19_snp151Common_rs58102497 range=chr12:33816124-33816142 5'pad=9 3'pad=9 strand=+ repeatMasking=none	2.33624
hg19_snp151Common_rs78877795 range=chr12:33922763-33922781 5'pad=9 3'pad=9 strand=+ repeatMasking=none	-1.78428
hg19_snp151Common_rs7979535 range=chr12:33947441-33947459 5'pad=9 3'pad=9 strand=+ repeatMasking=none	2.18197
hg19_snp151Common_rs144475405 range=chr12:33954061-33954079 5'pad=9 3'pad=9 strand=+ repeatMasking=none	-0.361345
hg19_snp151Common_rs116496642 range=chr12:34037073-34037091 5'pad=9 3'pad=9 strand=+ repeatMasking=none	-0.306453
hg19_snp151Common_rs73107038 range=chr12:34143882-34143900 5'pad=9 3'pad=9 strand=+ repeatMasking=none	-0.383896
hg19_snp151Common_rs1844522 range=chr12:34169833-34169851 5'pad=9 3'pad=9 strand=- repeatMasking=none	0.483532
hg19_snp151Common_rs7358760 range=chr12:34207754-34207772 5'pad=9 3'pad=9 strand=+ repeatMasking=none	-0.272682
hg19_snp151Common_rs60199963 range=chr12:34449368-34449386 5'pad=9 3'pad=9 strand=+ repeatMasking=none	0.237877
hg19_snp151Common_rs138899343 range=chr12:34512069-34512086 5'pad=9 3'pad=9 strand=+ repeatMasking=none	0.027376
hg19_snp151Common_rs35652542 range=chr12:34828279-34828297 5'pad=9 3'pad=9 strand=+ repeatMasking=none	-0.335428
hg19_snp151Common_rs139958340 range=chr12:37908241-37908259 5'pad=9 3'pad=9 strand=+ repeatMasking=none	-3.01769
hg19_snp151Common_rs36104601 range=chr12:37939601-37939619 5'pad=9 3'pad=9 strand=+ repeatMasking=none	1.3461
hg19_snp151Common_rs115189038 range=chr12:37981165-37981183 5'pad=9 3'pad=9 strand=+ repeatMasking=none	0.828215
hg19_snp151Common_rs8189520 range=chr12:38033621-38033639 5'pad=9 3'pad=9 strand=+ repeatMasking=none	-0.751538
hg19_snp151Common_rs550448004 range=chr12:38057565-38057583 5'pad=9 3'pad=9 strand=+ repeatMasking=none	1.69831
hg19_snp151Common_rs561673537 range=chr12:38096103-38096121 5'pad=9 3'pad=9 strand=+ repeatMasking=none	-0.697787
hg19_snp151Common_rs28874015 range=chr12:38153467-38153485 5'pad=9 3'pad=9 strand=+ repeatMasking=none	2.01052
hg19_snp151Common_rs11532421 range=chr12:38287641-38287659 5'pad=9 3'pad=9 strand=+ repeatMasking=none	1.8741
hg19_snp151Common_rs117424599 range=chr12:38297250-38297268 5'pad=9 3'pad=9 strand=+ repeatMasking=none	0.996718
hg19_snp151Common_rs11181635 range=chr12:38378411-38378429 5'pad=9 3'pad=9 strand=+ repeatMasking=none	1.2491
hg19_snp151Common_rs541070680 range=chr12:38378852-38378870 5'pad=9 3'pad=9 strand=+ repeatMasking=none	3.48309
hg19_snp151Common_rs74422625 range=chr12:38418277-38418295 5'pad=9 3'pad=9 strand=+ repeatMasking=none	-1.83491
hg19_snp151Common_rs56880015 range=chr12:38439160-38439178 5'pad=9 3'pad=9 strand=+ repeatMasking=none	2.72071
hg19_snp151Common_rs371142939 range=chr12:38466918-38466936 5'pad=9 3'pad=9 strand=+ repeatMasking=none	3.38254
hg19_snp151Common_rs116007999 range=chr12:38477626-38477644 5'pad=9 3'pad=9 strand=+ repeatMasking=none	1.15744
hg19_snp151Common_rs74082057 range=chr12:38479032-38479050 5'pad=9 3'pad=9 strand=+ repeatMasking=none	1.49313
hg19_snp151Common_rs11495407 range=chr12:38488324-38488342 5'pad=9 3'pad=9 strand=+ repeatMasking=none	0.306588
hg19_snp151Common_rs114101962 range=chr12:38640273-38640291 5'pad=9 3'pad=9 strand=+ repeatMasking=none	-0.022049
hg19_snp151Common_rs10880978 range=chr12:38761798-38761816 5'pad=9 3'pad=9 strand=+ repeatMasking=none	-0.935895
hg19_snp151Common_rs111757450 range=chr12:38805040-38805058 5'pad=9 3'pad=9 strand=+ repeatMasking=none	-1.13998
hg19_snp151Common_rs139184221 range=chr12:38893833-38893851 5'pad=9 3'pad=9 strand=+ repeatMasking=none	0.249504
hg19_snp151Common_rs115338491 range=chr12:39163045-39163063 5'pad=9 3'pad=9 strand=+ repeatMasking=none	-1.24115
hg19_snp151Common_rs113139611 range=chr12:39341403-39341421 5'pad=9 3'pad=9 strand=+ repeatMasking=none	-0.076272
hg19_snp151Common_rs74797339 range=chr12:39508043-39508061 5'pad=9 3'pad=9 strand=+ repeatMasking=none	-0.739575
hg19_snp151Common_rs77115887 range=chr12:39723960-39723978 5'pad=9 3'pad=9 strand=+ repeatMasking=none	0.692544
hg19_snp151Common_rs77485456 range=chr12:39903463-39903481 5'pad=9 3'pad=9 strand=+ repeatMasking=none	0.078661
hg19_snp151Common_rs4556618 range=chr12:40145697-40145715 5'pad=9 3'pad=9 strand=+ repeatMasking=none	1.09804
hg19_snp151Common_rs75429034 range=chr12:40191596-40191614 5'pad=9 3'pad=9 strand=+ repeatMasking=none	0.825595
hg19_snp151Common_rs2638240 range=chr12:40576108-40576126 5'pad=9 3'pad=9 strand=- repeatMasking=none	-1.44338
hg19_snp151Common_rs115686271 range=chr12:40639034-40639052 5'pad=9 3'pad=9 strand=+ repeatMasking=none	1.71857
hg19_snp151Common_rs17484493 range=chr12:40740864-40740882 5'pad=9 3'pad=9 strand=+ repeatMasking=none	-0.867416
hg19_snp151Common_rs2896981 range=chr12:40781575-40781593 5'pad=9 3'pad=9 strand=+ repeatMasking=none	-0.218686
hg19_snp151Common_rs17128229 range=chr12:40846628-40846646 5'pad=9 3'pad=9 strand=+ repeatMasking=none	-1.77598
hg19_snp151Common_rs7137967 range=chr12:41136770-41136788 5'pad=9 3'pad=9 strand=+ repeatMasking=none	0.500937
hg19_snp151Common_rs7133020 range=chr12:41169862-41169880 5'pad=9 3'pad=9 strand=+ repeatMasking=none	0.608921
hg19_snp151Common_rs10879395 range=chr12:41340443-41340461 5'pad=9 3'pad=9 strand=+ repeatMasking=none	-0.606515
hg19_snp151Common_rs9669430 range=chr12:41479995-41480013 5'pad=9 3'pad=9 strand=+ repeatMasking=none	1.33259
hg19_snp151Common_rs1431103 range=chr12:41590487-41590505 5'pad=9 3'pad=9 strand=+ repeatMasking=none	-1.07365
hg19_snp151Common_rs1346905 range=chr12:41594167-41594185 5'pad=9 3'pad=9 strand=+ repeatMasking=none	-0.957983
hg19_snp151Common_rs7486754 range=chr12:41663187-41663205 5'pad=9 3'pad=9 strand=+ repeatMasking=none	0.645536
hg19_snp151Common_rs117645253 range=chr12:41715552-41715570 5'pad=9 3'pad=9 strand=+ repeatMasking=none	0.631167
hg19_snp151Common_rs35766123 range=chr12:41807013-41807031 5'pad=9 3'pad=9 strand=+ repeatMasking=none	-1.8278
hg19_snp151Common_rs10880091 range=chr12:41916877-41916895 5'pad=9 3'pad=9 strand=+ repeatMasking=none	-0.044177
hg19_snp151Common_rs11181039 range=chr12:41992487-41992505 5'pad=9 3'pad=9 strand=+ repeatMasking=none	-0.75471
hg19_snp151Common_rs73120242 range=chr12:42026416-42026434 5'pad=9 3'pad=9 strand=+ repeatMasking=none	0.255146
hg19_snp151Common_rs80350470 range=chr12:42219937-42219955 5'pad=9 3'pad=9 strand=+ repeatMasking=none	-0.648251
hg19_snp151Common_rs11181258 range=chr12:42331423-42331441 5'pad=9 3'pad=9 strand=+ repeatMasking=none	-0.623707
hg19_snp151Common_rs74684108 range=chr12:42471826-42471844 5'pad=9 3'pad=9 strand=+ repeatMasking=none	-0.639835
hg19_snp151Common_rs73131138 range=chr12:42579714-42579732 5'pad=9 3'pad=9 strand=+ repeatMasking=none	-0.495151
hg19_snp151Common_rs7972281 range=chr12:43022421-43022439 5'pad=9 3'pad=9 strand=+ repeatMasking=none	3.01225
hg19_snp151Common_rs9804781 range=chr12:43107293-43107311 5'pad=9 3'pad=9 strand=+ repeatMasking=none	-0.594998
hg19_snp151Common_rs2678146 range=chr12:43177671-43177689 5'pad=9 3'pad=9 strand=- repeatMasking=none	0.422716
hg19_snp151Common_rs12227246 range=chr12:43223261-43223279 5'pad=9 3'pad=9 strand=+ repeatMasking=none	-0.072642
hg19_snp151Common_rs375013614 range=chr12:43396441-43396459 5'pad=9 3'pad=9 strand=+ repeatMasking=none	-1.01472
hg19_snp151Common_rs141380023 range=chr12:44217364-44217382 5'pad=9 3'pad=9 strand=+ repeatMasking=none	-0.924575
hg19_snp151Common_rs113400697 range=chr12:44348748-44348766 5'pad=9 3'pad=9 strand=+ repeatMasking=none	0.132825
hg19_snp151Common_rs113254957 range=chr12:44372729-44372747 5'pad=9 3'pad=9 strand=+ repeatMasking=none	0.125256
hg19_snp151Common_rs77838534 range=chr12:44582707-44582725 5'pad=9 3'pad=9 strand=+ repeatMasking=none	0.215664
hg19_snp151Common_rs111724364 range=chr12:44688360-44688378 5'pad=9 3'pad=9 strand=+ repeatMasking=none	0.558261
hg19_snp151Common_rs1873980 range=chr12:44802374-44802392 5'pad=9 3'pad=9 strand=- repeatMasking=none	-2.11925
hg19_snp151Common_rs59907388 range=chr12:44860631-44860649 5'pad=9 3'pad=9 strand=+ repeatMasking=none	0.021402
hg19_snp151Common_rs61391734 range=chr12:44950896-44950914 5'pad=9 3'pad=9 strand=+ repeatMasking=none	0.728682
hg19_snp151Common_rs57061175 range=chr12:45183184-45183202 5'pad=9 3'pad=9 strand=+ repeatMasking=none	0.197476
hg19_snp151Common_rs11182708 range=chr12:45228685-45228703 5'pad=9 3'pad=9 strand=+ repeatMasking=none	-0.793189
hg19_snp151Common_rs375660 range=chr12:45337338-45337356 5'pad=9 3'pad=9 strand=+ repeatMasking=none	-0.133644
hg19_snp151Common_rs77876702 range=chr12:45495163-45495181 5'pad=9 3'pad=9 strand=+ repeatMasking=none	-1.70977
hg19_snp151Common_rs10785548 range=chr12:45511011-45511029 5'pad=9 3'pad=9 strand=+ repeatMasking=none	-0.43552
hg19_snp151Common_rs12306299 range=chr12:45554285-45554303 5'pad=9 3'pad=9 strand=+ repeatMasking=none	0.112855
hg19_snp151Common_rs149909526 range=chr12:45842479-45842497 5'pad=9 3'pad=9 strand=+ repeatMasking=none	-1.18694
hg19_snp151Common_rs10880864 range=chr12:46261292-46261310 5'pad=9 3'pad=9 strand=+ repeatMasking=none	0.113511
hg19_snp151Common_rs7315213 range=chr12:46482716-46482734 5'pad=9 3'pad=9 strand=+ repeatMasking=none	1.35869
hg19_snp151Common_rs116845314 range=chr12:46490709-46490727 5'pad=9 3'pad=9 strand=+ repeatMasking=none	-1.7142
hg19_snp151Common_rs1045278 range=chr12:46582531-46582549 5'pad=9 3'pad=9 strand=- repeatMasking=none	0.744536
hg19_snp151Common_rs2471588 range=chr12:46926179-46926197 5'pad=9 3'pad=9 strand=- repeatMasking=none	-1.15545
hg19_snp151Common_rs2257215 range=chr12:46942985-46943003 5'pad=9 3'pad=9 strand=+ repeatMasking=none	-1.14619
hg19_snp151Common_rs4533116 range=chr12:47226552-47226570 5'pad=9 3'pad=9 strand=+ repeatMasking=none	2.33839
hg19_snp151Common_rs2715778 range=chr12:47239023-47239041 5'pad=9 3'pad=9 strand=+ repeatMasking=none	-2.8969
hg19_snp151Common_rs61927723 range=chr12:47597974-47597992 5'pad=9 3'pad=9 strand=+ repeatMasking=none	1.0351
hg19_snp151Common_rs1101809 range=chr12:47648659-47648677 5'pad=9 3'pad=9 strand=+ repeatMasking=none	-1.80853
hg19_snp151Common_rs2905498 range=chr12:47848649-47848667 5'pad=9 3'pad=9 strand=+ repeatMasking=none	1.67241
hg19_snp151Common_rs61918089 range=chr12:47923387-47923405 5'pad=9 3'pad=9 strand=+ repeatMasking=none	1.184
hg19_snp151Common_rs11307316 range=chr12:47963506-47963524 5'pad=9 3'pad=9 strand=+ repeatMasking=none	0.739776
hg19_snp151Common_rs76798446 range=chr12:48090576-48090594 5'pad=9 3'pad=9 strand=+ repeatMasking=none	1.40153
hg19_snp151Common_rs929269 range=chr12:48114752-48114770 5'pad=9 3'pad=9 strand=- repeatMasking=none	-0.434241
hg19_snp151Common_rs61917655 range=chr12:48210778-48210796 5'pad=9 3'pad=9 strand=+ repeatMasking=none	0.026758
hg19_snp151Common_rs1544410 range=chr12:48239826-48239844 5'pad=9 3'pad=9 strand=- repeatMasking=none	-0.620232
hg19_snp151Common_rs2238135 range=chr12:48278181-48278199 5'pad=9 3'pad=9 strand=- repeatMasking=none	0.533349
hg19_snp151Common_rs10875722 range=chr12:48413625-48413643 5'pad=9 3'pad=9 strand=+ repeatMasking=none	-0.60137
hg19_snp151Common_rs61750873 range=chr12:48478993-48479011 5'pad=9 3'pad=9 strand=+ repeatMasking=none	0.232989
hg19_snp151Common_rs118112324 range=chr12:48493069-48493087 5'pad=9 3'pad=9 strand=+ repeatMasking=none	-0.856134
hg19_snp151Common_rs77844502 range=chr12:48638332-48638350 5'pad=9 3'pad=9 strand=+ repeatMasking=none	0.958897
hg19_snp151Common_rs2956710 range=chr12:48644801-48644819 5'pad=9 3'pad=9 strand=- repeatMasking=none	-1.1524
hg19_snp151Common_rs17825013 range=chr12:48702816-48702834 5'pad=9 3'pad=9 strand=+ repeatMasking=none	1.62705
hg19_snp151Common_rs11541302 range=chr12:48765029-48765047 5'pad=9 3'pad=9 strand=+ repeatMasking=none	-0.783071
hg19_snp151Common_rs61942820 range=chr12:48824123-48824141 5'pad=9 3'pad=9 strand=+ repeatMasking=none	0.770458
hg19_snp151Common_rs79263537 range=chr12:49314908-49314926 5'pad=9 3'pad=9 strand=+ repeatMasking=none	-1.57634
hg19_snp151Common_rs112748719 range=chr12:49857484-49857502 5'pad=9 3'pad=9 strand=+ repeatMasking=none	0.029437
hg19_snp151Common_rs2358539 range=chr12:50619609-50619627 5'pad=9 3'pad=9 strand=+ repeatMasking=none	1.81263
hg19_snp151Common_rs11169368 range=chr12:50699031-50699049 5'pad=9 3'pad=9 strand=+ repeatMasking=none	-0.895649
hg19_snp151Common_rs118171382 range=chr12:50931214-50931232 5'pad=9 3'pad=9 strand=+ repeatMasking=none	-0.473599
hg19_snp151Common_rs140363871 range=chr12:51266390-51266408 5'pad=9 3'pad=9 strand=+ repeatMasking=none	-1.58745
hg19_snp151Common_rs2730647 range=chr12:51554817-51554835 5'pad=9 3'pad=9 strand=+ repeatMasking=none	2.2413
hg19_snp151Common_rs112648976 range=chr12:51555246-51555264 5'pad=9 3'pad=9 strand=+ repeatMasking=none	0.606098
hg19_snp151Common_rs11441886 range=chr12:51646611-51646628 5'pad=9 3'pad=9 strand=+ repeatMasking=none	-0.715072
hg19_snp151Common_rs6580848 range=chr12:52263893-52263911 5'pad=9 3'pad=9 strand=+ repeatMasking=none	0.22209
hg19_snp151Common_rs873438 range=chr12:52267141-52267159 5'pad=9 3'pad=9 strand=- repeatMasking=none	0.801361
hg19_snp151Common_rs2859593 range=chr12:52326947-52326965 5'pad=9 3'pad=9 strand=- repeatMasking=none	-6.11737
hg19_snp151Common_rs148266858 range=chr12:52373071-52373089 5'pad=9 3'pad=9 strand=+ repeatMasking=none	1.34367
hg19_snp151Common_rs111450533 range=chr12:52410716-52410734 5'pad=9 3'pad=9 strand=+ repeatMasking=none	0.48201
hg19_snp151Common_rs150221111 range=chr12:52505538-52505556 5'pad=9 3'pad=9 strand=+ repeatMasking=none	0.429976
hg19_snp151Common_rs149098810 range=chr12:52509621-52509639 5'pad=9 3'pad=9 strand=+ repeatMasking=none	2.4469
hg19_snp151Common_rs10219512 range=chr12:52537632-52537650 5'pad=9 3'pad=9 strand=+ repeatMasking=none	0.032051
hg19_snp151Common_rs78487129 range=chr12:52572892-52572910 5'pad=9 3'pad=9 strand=+ repeatMasking=none	-0.551823
hg19_snp151Common_rs2286996 range=chr12:52647794-52647812 5'pad=9 3'pad=9 strand=- repeatMasking=none	-3.69916
hg19_snp151Common_rs2293638 range=chr12:52820235-52820253 5'pad=9 3'pad=9 strand=- repeatMasking=none	-0.047026
hg19_snp151Common_rs2232380 range=chr12:52828297-52828315 5'pad=9 3'pad=9 strand=- repeatMasking=none	-0.180885
hg19_snp151Common_rs10876370 range=chr12:53248075-53248093 5'pad=9 3'pad=9 strand=+ repeatMasking=none	2.13082
hg19_snp151Common_rs2682306 range=chr12:53270398-53270416 5'pad=9 3'pad=9 strand=- repeatMasking=none	1.44397
hg19_snp151Common_rs116661089 range=chr12:53367579-53367597 5'pad=9 3'pad=9 strand=+ repeatMasking=none	0.026406
hg19_snp151Common_rs17123172 range=chr12:53494379-53494397 5'pad=9 3'pad=9 strand=+ repeatMasking=none	1.0131
hg19_snp151Common_rs139314301 range=chr12:53506055-53506073 5'pad=9 3'pad=9 strand=+ repeatMasking=none	-0.730001
hg19_snp151Common_rs151308533 range=chr12:53760258-53760276 5'pad=9 3'pad=9 strand=+ repeatMasking=none	1.02337
hg19_snp151Common_rs11834879 range=chr12:54555150-54555168 5'pad=9 3'pad=9 strand=+ repeatMasking=none	1.10797
hg19_snp151Common_rs116463597 range=chr12:54652429-54652447 5'pad=9 3'pad=9 strand=+ repeatMasking=none	-0.256189
hg19_snp151Common_rs3840781 range=chr12:54758354-54758372 5'pad=9 3'pad=9 strand=- repeatMasking=none	0.068128
hg19_snp151Common_rs12296181 range=chr12:54794232-54794250 5'pad=9 3'pad=9 strand=+ repeatMasking=none	-2.50554
hg19_snp151Common_rs61923480 range=chr12:54884193-54884211 5'pad=9 3'pad=9 strand=+ repeatMasking=none	-0.774393
hg19_snp151Common_rs1249950 range=chr12:54970445-54970463 5'pad=9 3'pad=9 strand=+ repeatMasking=none	1.76768
hg19_snp151Common_rs57280187 range=chr12:55125143-55125161 5'pad=9 3'pad=9 strand=+ repeatMasking=none	-0.158323
hg19_snp151Common_rs2633413 range=chr12:55432117-55432135 5'pad=9 3'pad=9 strand=- repeatMasking=none	-2.0005
hg19_snp151Common_rs11171286 range=chr12:55513306-55513324 5'pad=9 3'pad=9 strand=+ repeatMasking=none	0.000485
hg19_snp151Common_rs10876715 range=chr12:55532159-55532177 5'pad=9 3'pad=9 strand=+ repeatMasking=none	-1.90348
hg19_snp151Common_rs144430839 range=chr12:55550387-55550405 5'pad=9 3'pad=9 strand=+ repeatMasking=none	0.897191
hg19_snp151Common_rs7960409 range=chr12:55898503-55898521 5'pad=9 3'pad=9 strand=+ repeatMasking=none	0.317701
hg19_snp151Common_rs11835716 range=chr12:55945249-55945267 5'pad=9 3'pad=9 strand=+ repeatMasking=none	0.987522
hg19_snp151Common_rs117270945 range=chr12:55982277-55982295 5'pad=9 3'pad=9 strand=+ repeatMasking=none	-0.143944
hg19_snp151Common_rs79135614 range=chr12:56071308-56071326 5'pad=9 3'pad=9 strand=+ repeatMasking=none	1.25287
hg19_snp151Common_rs12320309 range=chr12:56273564-56273582 5'pad=9 3'pad=9 strand=+ repeatMasking=none	0.004644
hg19_snp151Common_rs7309340 range=chr12:56454562-56454580 5'pad=9 3'pad=9 strand=+ repeatMasking=none	-2.03497
hg19_snp151Common_rs1274494 range=chr12:56618089-56618107 5'pad=9 3'pad=9 strand=- repeatMasking=none	2.19382
hg19_snp151Common_rs17118431 range=chr12:56667091-56667109 5'pad=9 3'pad=9 strand=+ repeatMasking=none	2.03007
hg19_snp151Common_rs11575229 range=chr12:56750728-56750746 5'pad=9 3'pad=9 strand=- repeatMasking=none	-0.646535
hg19_snp151Common_rs1903370 range=chr12:57206675-57206693 5'pad=9 3'pad=9 strand=- repeatMasking=none	0.704135
hg19_snp151Common_rs80121216 range=chr12:57253289-57253307 5'pad=9 3'pad=9 strand=+ repeatMasking=none	1.65296
hg19_snp151Common_rs2888107 range=chr12:57301385-57301403 5'pad=9 3'pad=9 strand=- repeatMasking=none	-0.775429
hg19_snp151Common_rs12814239 range=chr12:57569469-57569487 5'pad=9 3'pad=9 strand=+ repeatMasking=none	-0.395481
hg19_snp151Common_rs377330434 range=chr12:57853945-57853963 5'pad=9 3'pad=9 strand=+ repeatMasking=none	0.456396
hg19_snp151Common_rs4760255 range=chr12:57855171-57855189 5'pad=9 3'pad=9 strand=+ repeatMasking=none	0.831729
hg19_snp151Common_rs541869 range=chr12:57878112-57878130 5'pad=9 3'pad=9 strand=+ repeatMasking=none	0.89108
hg19_snp151Common_rs7973639 range=chr12:57985420-57985438 5'pad=9 3'pad=9 strand=+ repeatMasking=none	-3.05856
hg19_snp151Common_rs117839344 range=chr12:58183627-58183645 5'pad=9 3'pad=9 strand=+ repeatMasking=none	0.258531
hg19_snp151Common_rs368571344 range=chr12:58240326-58240344 5'pad=9 3'pad=9 strand=+ repeatMasking=none	0.023209
hg19_snp151Common_rs3933982 range=chr12:58382088-58382106 5'pad=9 3'pad=9 strand=- repeatMasking=none	1.82738
hg19_snp151Common_rs73337720 range=chr12:58406070-58406088 5'pad=9 3'pad=9 strand=+ repeatMasking=none	-0.203134
hg19_snp151Common_rs55889877 range=chr12:58882803-58882821 5'pad=9 3'pad=9 strand=+ repeatMasking=none	-0.706236
hg19_snp151Common_rs4760231 range=chr12:58934593-58934611 5'pad=9 3'pad=9 strand=+ repeatMasking=none	0.31918
hg19_snp151Common_rs12813656 range=chr12:58940643-58940661 5'pad=9 3'pad=9 strand=+ repeatMasking=none	-0.599872
hg19_snp151Common_rs1378821 range=chr12:59082258-59082276 5'pad=9 3'pad=9 strand=- repeatMasking=none	-0.168425
hg19_snp151Common_rs17121387 range=chr12:59138627-59138645 5'pad=9 3'pad=9 strand=+ repeatMasking=none	-0.071887
hg19_snp151Common_rs78636501 range=chr12:59229650-59229668 5'pad=9 3'pad=9 strand=+ repeatMasking=none	-0.541322
hg19_snp151Common_rs148228830 range=chr12:59246179-59246197 5'pad=9 3'pad=9 strand=+ repeatMasking=none	0.79539
hg19_snp151Common_rs78361319 range=chr12:59254180-59254198 5'pad=9 3'pad=9 strand=+ repeatMasking=none	1.26164
hg19_snp151Common_rs146632796 range=chr12:59330183-59330200 5'pad=9 3'pad=9 strand=+ repeatMasking=none	0.655918
hg19_snp151Common_rs78489497 range=chr12:59379889-59379907 5'pad=9 3'pad=9 strand=+ repeatMasking=none	0.262895
hg19_snp151Common_rs11172880 range=chr12:59428658-59428676 5'pad=9 3'pad=9 strand=+ repeatMasking=none	0.269865
hg19_snp151Common_rs112786335 range=chr12:59499685-59499703 5'pad=9 3'pad=9 strand=+ repeatMasking=none	1.14964
hg19_snp151Common_rs75955779 range=chr12:59762619-59762637 5'pad=9 3'pad=9 strand=+ repeatMasking=none	0.366725
hg19_snp151Common_rs116119946 range=chr12:59942162-59942180 5'pad=9 3'pad=9 strand=+ repeatMasking=none	1.13421
hg19_snp151Common_rs55869967 range=chr12:60171665-60171683 5'pad=9 3'pad=9 strand=+ repeatMasking=none	-2.32633
hg19_snp151Common_rs4439553 range=chr12:60199756-60199774 5'pad=9 3'pad=9 strand=+ repeatMasking=none	1.6201
hg19_snp151Common_rs12321091 range=chr12:60535220-60535238 5'pad=9 3'pad=9 strand=+ repeatMasking=none	3.8227
hg19_snp151Common_rs2134886 range=chr12:60785059-60785077 5'pad=9 3'pad=9 strand=+ repeatMasking=none	-0.592358
hg19_snp151Common_rs544627563 range=chr12:60931998-60932015 5'pad=9 3'pad=9 strand=+ repeatMasking=none	0.862728
hg19_snp151Common_rs80209850 range=chr12:61113689-61113707 5'pad=9 3'pad=9 strand=+ repeatMasking=none	-1.14123
hg19_snp151Common_rs114651986 range=chr12:61214025-61214043 5'pad=9 3'pad=9 strand=+ repeatMasking=none	1.24754
hg19_snp151Common_rs7306016 range=chr12:61417643-61417661 5'pad=9 3'pad=9 strand=+ repeatMasking=none	0.644508
hg19_snp151Common_rs10747908 range=chr12:61486603-61486621 5'pad=9 3'pad=9 strand=+ repeatMasking=none	-0.261188
hg19_snp151Common_rs2731403 range=chr12:61708422-61708440 5'pad=9 3'pad=9 strand=+ repeatMasking=none	2.01762
hg19_snp151Common_rs12371435 range=chr12:61787849-61787867 5'pad=9 3'pad=9 strand=+ repeatMasking=none	-0.686284
hg19_snp151Common_rs4283055 range=chr12:61796649-61796667 5'pad=9 3'pad=9 strand=+ repeatMasking=none	-1.45217
hg19_snp151Common_rs1869401 range=chr12:62013694-62013712 5'pad=9 3'pad=9 strand=+ repeatMasking=none	0.192958
hg19_snp151Common_rs1506847 range=chr12:62081161-62081179 5'pad=9 3'pad=9 strand=+ repeatMasking=none	-1.13051
hg19_snp151Common_rs115627145 range=chr12:62140621-62140639 5'pad=9 3'pad=9 strand=+ repeatMasking=none	-0.265817
hg19_snp151Common_rs7965138 range=chr12:62301552-62301570 5'pad=9 3'pad=9 strand=+ repeatMasking=none	-0.430822
hg19_snp151Common_rs66467365 range=chr12:62498049-62498067 5'pad=9 3'pad=9 strand=- repeatMasking=none	-0.42218
hg19_snp151Common_rs34320621 range=chr12:62526892-62526910 5'pad=9 3'pad=9 strand=+ repeatMasking=none	0.603527
hg19_snp151Common_rs115441909 range=chr12:62553417-62553435 5'pad=9 3'pad=9 strand=+ repeatMasking=none	-1.66642
hg19_snp151Common_rs17717265 range=chr12:62765568-62765586 5'pad=9 3'pad=9 strand=+ repeatMasking=none	0.138532
hg19_snp151Common_rs342165 range=chr12:63081260-63081278 5'pad=9 3'pad=9 strand=+ repeatMasking=none	-0.135365
hg19_snp151Common_rs1146112 range=chr12:63703119-63703137 5'pad=9 3'pad=9 strand=- repeatMasking=none	1.0303
hg19_snp151Common_rs489614 range=chr12:63819320-63819338 5'pad=9 3'pad=9 strand=- repeatMasking=none	3.08106
hg19_snp151Common_rs58579188 range=chr12:63983907-63983925 5'pad=9 3'pad=9 strand=+ repeatMasking=none	2.84413
hg19_snp151Common_rs12317994 range=chr12:64137142-64137160 5'pad=9 3'pad=9 strand=+ repeatMasking=none	-0.921576
hg19_snp151Common_rs4762999 range=chr12:64197771-64197789 5'pad=9 3'pad=9 strand=+ repeatMasking=none	-1.10745
hg19_snp151Common_rs73313436 range=chr12:64215187-64215205 5'pad=9 3'pad=9 strand=+ repeatMasking=none	0.212155
hg19_snp151Common_rs11614289 range=chr12:64231667-64231685 5'pad=9 3'pad=9 strand=+ repeatMasking=none	0.058722
hg19_snp151Common_rs4553444 range=chr12:64433436-64433454 5'pad=9 3'pad=9 strand=+ repeatMasking=none	0.530803
hg19_snp151Common_rs789738 range=chr12:64536000-64536018 5'pad=9 3'pad=9 strand=- repeatMasking=none	-0.544605
hg19_snp151Common_rs12581905 range=chr12:64678407-64678425 5'pad=9 3'pad=9 strand=+ repeatMasking=none	1.06545
hg19_snp151Common_rs142617537 range=chr12:64761516-64761534 5'pad=9 3'pad=9 strand=+ repeatMasking=none	-0.090711
hg19_snp151Common_rs75365483 range=chr12:64822746-64822764 5'pad=9 3'pad=9 strand=+ repeatMasking=none	0.224116
hg19_snp151Common_rs115304675 range=chr12:64933321-64933339 5'pad=9 3'pad=9 strand=+ repeatMasking=none	-0.137824
hg19_snp151Common_rs76569522 range=chr12:65010490-65010508 5'pad=9 3'pad=9 strand=+ repeatMasking=none	0.426453
[truncated: 503 more rows]

## Sheet: 3f
SNP1
[truncated: 58 more rows]
