# Supplementary material for: Analysis of zebrafish periderm enhancers facilitates identification of a regulatory variant near human KRT8/18
Source: bioRxiv preprint, doi:10.1101/2020.01.27.921320, version 1 (2020-01-27)
Supplement: Supplementary File 2 [file 921320_file04.xlsx]

## Sheet: 1a
Sample Group	Type of Sequence	Number of Consensus Peak
GFP positive cells from Tg(krt4:GFP)	ATAC-seq	141614
GFP negative cells from Tg(krt4:GFP)	ATAC-seq	198769
Palatal epithelium from E14.5	ATAC-seq	101338
Palatal mesenchyme from E14.5	ATAC-seq	108452
HIOEC_D3	ATAC-seq	148125
HEPM	ATAC-seq	106247
HIOEC_D3_H3K27Ac	H3K27Ac ChIP-seq	107134

## Sheet: 1b
chr1	432144	432328
chr1	489231	489551
chr1	522024	522701
chr1	529434	530054
chr1	544257	545070
chr1	550431	550628
chr1	565194	567179
chr1	591944	592075
chr1	592268	593081
chr1	593188	593790
chr1	593847	594827
chr1	596772	597457
chr1	644655	645097
chr1	1203836	1204480
chr1	2086895	2087102
chr1	2113888	2114064
chr1	2119657	2119862
chr1	2120266	2120619
chr1	2125796	2126067
chr1	2155919	2156202
chr1	3406492	3406863
chr1	4292152	4292311
chr1	4421280	4421384
chr1	4549609	4549967
chr1	4855361	4855587
chr1	4930313	4930502
chr1	4936322	4936582
chr1	5030335	5030442
chr1	7179293	7179480
chr1	7730929	7731188
chr1	7731481	7731583
chr1	7732141	7732264
chr1	8551528	8551895
chr1	8552161	8552283
chr1	8936372	8936727
chr1	9016922	9017309
chr1	9529771	9530032
chr1	10197135	10197334
chr1	11013866	11014116
chr1	11034445	11034976
chr1	11201712	11202019
chr1	11422781	11422959
chr1	11430661	11430799
chr1	11431412	11431830
chr1	11440789	11440995
chr1	11441362	11441532
chr1	13000440	13000630
chr1	14046228	14046596
chr1	14047236	14047393
chr1	14088659	14089031
chr1	14105635	14105898
chr1	14107131	14107317
chr1	15176207	15176585
chr1	15313245	15313653
chr1	15406774	15407012
chr1	15948318	15948374
chr1	16060699	16060860
chr1	16300517	16300976
chr1	17285852	17286035
chr1	17377944	17378049
chr1	17399449	17399574
chr1	17454027	17454232
chr1	17590274	17590405
chr1	17612978	17613447
chr1	18133029	18133179
chr1	18143026	18143347
chr1	18144103	18144331
chr1	18144599	18144814
chr1	18144984	18145270
chr1	18542376	18542611
chr1	19373456	19373595
chr1	19374841	19375359
chr1	19599664	19599964
chr1	19964870	19965190
chr1	20390721	20390823
chr1	22587140	22587394
chr1	23068750	23068930
chr1	23231117	23231305
chr1	23335009	23335275
chr1	23785537	23785794
chr1	23791828	23792057
chr1	24034298	24034715
chr1	24066126	24066250
chr1	24074897	24075002
chr1	24085147	24085259
chr1	24193250	24193463
chr1	24193748	24193872
chr1	24412423	24412641
chr1	25254076	25254150
chr1	25293918	25294111
chr1	25583582	25583957
chr1	25590641	25590739
chr1	25595529	25595854
chr1	25604037	25604325
chr1	27039871	27040055
chr1	27792014	27792229
chr1	28743545	28743663
chr1	29460871	29460968
chr1	30132519	30132631
chr1	31287844	31288051
chr1	32316901	32317017
chr1	33006714	33007131
chr1	33044680	33044836
chr1	33066904	33067302
chr1	33191768	33192033
chr1	33378138	33378506
chr1	34207878	34208092
chr1	34243942	34244179
chr1	34245073	34245509
chr1	34248784	34248881
chr1	34260996	34261312
chr1	34263500	34263638
chr1	34294046	34294375
chr1	34299611	34299922
chr1	34300619	34300724
chr1	35250725	35250988
chr1	35626471	35626786
chr1	35627152	35627346
chr1	35629752	35630111
chr1	36479979	36480191
chr1	36524325	36524585
chr1	36686678	36686831
chr1	37228217	37228437
chr1	37531394	37531601
chr1	37533369	37533476
chr1	37591519	37592160
chr1	37817820	37818129
chr1	38558977	38559091
chr1	38768391	38768545
chr1	39173668	39173876
chr1	39881139	39881268
chr1	40692908	40693066
chr1	40777098	40777281
chr1	40843581	40843894
chr1	41530233	41530414
chr1	41619406	41619611
chr1	41620468	41620808
chr1	41924797	41924946
chr1	42170883	42170957
chr1	42171009	42171113
chr1	44185623	44185731
chr1	44433498	44433638
chr1	45252532	45252723
chr1	45362563	45362861
chr1	45511774	45511976
chr1	45643446	45643696
chr1	45651134	45651405
chr1	46251796	46251931
chr1	46723257	46723417
chr1	47066308	47066657
chr1	47100176	47100423
chr1	47149606	47149723
chr1	47258364	47258520
chr1	47328020	47328355
chr1	48145507	48145691
chr1	48146077	48146234
chr1	48243185	48243418
chr1	49885507	49885626
chr1	49885767	49885973
chr1	50188508	50188655
chr1	51237486	51237607
chr1	52297531	52297765
chr1	52420023	52420377
chr1	52485101	52485435
chr1	52729665	52729871
chr1	52786733	52786909
chr1	52799162	52799579
chr1	52806702	52806892
chr1	52812344	52812741
chr1	52816325	52816521
chr1	52876839	52877041
chr1	52879690	52879760
chr1	52885703	52885878
chr1	52916056	52916184
chr1	52992282	52992745
chr1	52994757	52994961
chr1	52999774	53000013
chr1	53806015	53806340
chr1	53825356	53825719
chr1	53827841	53827978
chr1	53828794	53829019
chr1	54409000	54409175
chr1	54414092	54414311
chr1	54467936	54468108
chr1	54473558	54473986
chr1	54676032	54676182
chr1	54719760	54720067
chr1	54731888	54732131
chr1	55282348	55282438
chr1	55527213	55527416
chr1	55592176	55592320
chr1	55673227	55673562
chr1	56727015	56727477
chr1	57298565	57298740
chr1	57299824	57299895
chr1	57653285	57653494
chr1	58097744	58098172
chr1	58098261	58098346
chr1	58963618	58963766
chr1	58963860	58964089
chr1	59211859	59212133
chr1	59491253	59491534
chr1	59491948	59492354
chr1	59765155	59765355
chr1	59766969	59767289
chr1	59806408	59806922
chr1	59947947	59948039
chr1	59948893	59949036
chr1	60035787	60035960
chr1	60098228	60098301
chr1	60099487	60099664
chr1	60099851	60100058
chr1	60101418	60101736
chr1	60104738	60105049
chr1	60255867	60256282
chr1	60266981	60267247
chr1	60285238	60286463
chr10	101878	102171
chr10	117593	117837
chr10	232994	233223
chr10	265248	265651
chr10	285175	285705
chr10	1273118	1273435
chr10	1822540	1822766
chr10	1824330	1824609
chr10	2652443	2652600
chr10	2652697	2652941
chr10	2655874	2656219
chr10	2746160	2746457
chr10	2961470	2961814
chr10	3157990	3158236
chr10	3209391	3209606
chr10	3212066	3212283
chr10	3297273	3297451
chr10	3299761	3299936
chr10	4556547	4556785
chr10	4927661	4927796
chr10	5243979	5244091
chr10	5873255	5873419
chr10	5916872	5917175
chr10	5920337	5920610
chr10	5984197	5984484
chr10	5984586	5984696
chr10	6147443	6147553
chr10	6205943	6206138
chr10	6935538	6935799
chr10	7002532	7002897
chr10	7292295	7292399
chr10	7939935	7940180
chr10	8141412	8141620
chr10	8141771	8142247
chr10	8693560	8693800
chr10	8719369	8719766
chr10	8744274	8744470
chr10	8746469	8746735
chr10	9235249	9235386
chr10	9939425	9939605
chr10	9981584	9981918
chr10	10349913	10350097
chr10	10549475	10549570
chr10	10701222	10701521
chr10	10716933	10717380
chr10	10786028	10786177
chr10	10786553	10786631
chr10	10788811	10789132
chr10	10894680	10894913
chr10	10895161	10895298
chr10	10895486	10895672
chr10	11159802	11159973
chr10	11227819	11228113
chr10	11317637	11317767
chr10	13169452	13169620
chr10	13173324	13173559
chr10	13174354	13174653
chr10	13340259	13340434
chr10	13341755	13342089
chr10	15075838	15076018
chr10	15077225	15077543
chr10	15082093	15082317
chr10	15085773	15085946
chr10	15213137	15213300
chr10	15520436	15520627
chr10	15520744	15521042
chr10	15529720	15530082
chr10	15628120	15628250
chr10	15908061	15908217
chr10	16649829	16649942
chr10	16951060	16951434
chr10	17058708	17058891
chr10	17514890	17515082
chr10	17773098	17773166
chr10	17773307	17773443
chr10	17986535	17986629
chr10	18231055	18231227
chr10	19298555	19298654
chr10	19722301	19722470
chr10	20224401	20224619
chr10	20555649	20555802
chr10	20565865	20565964
chr10	20591881	20592067
chr10	20604991	20605201
chr10	20617298	20617449
chr10	20617906	20618325
chr10	20635273	20635488
chr10	21347817	21348049
chr10	21442851	21443017
chr10	22348032	22348215
chr10	22348338	22348562
chr10	22353314	22353577
chr10	22735917	22736261
chr10	23359030	23359207
chr10	24353629	24353845
chr10	24991366	24991629
chr10	25171764	25172204
chr10	26003015	26003106
chr10	26227469	26227675
chr10	26287503	26287820
chr10	26753103	26753308
chr10	26988229	26988364
chr10	27295000	27295133
chr10	27302842	27302977
chr10	27462343	27462682
chr10	27768231	27768432
chr10	27784909	27785087
chr10	27872293	27872578
chr10	27979800	27980222
chr10	28735998	28736121
chr10	28763138	28763256
chr10	28766306	28766676
chr10	28779110	28779320
chr10	28948683	28949165
chr10	29044018	29044184
chr10	29044430	29044772
chr10	32260671	32260862
chr10	32600407	32600716
chr10	32760198	32760372
chr10	33081978	33082174
chr10	33637714	33638118
chr10	34011762	34011960
chr10	34206255	34206398
chr10	34206545	34206686
chr10	34221753	34221917
chr10	34351476	34351624
chr10	34642036	34642217
chr10	34907987	34908227
chr10	34908309	34908469
chr10	34908598	34908808
chr10	34969917	34970069
chr10	35930881	35931019
chr10	36003569	36003860
chr10	36145581	36145743
chr10	36166779	36167129
chr10	36170419	36170575
chr10	36172915	36173371
chr10	36400898	36401165
chr10	36440422	36440723
chr10	36445998	36446301
chr10	36497008	36497126
chr10	36505921	36506242
chr10	38126161	38126294
chr10	38126528	38126865
chr10	38387014	38387359
chr10	38407763	38407902
chr10	38567395	38567535
chr10	39290885	39291075
chr10	39585579	39585697
chr10	40603695	40603953
chr10	40691799	40691885
chr10	43659448	43659618
chr10	43723020	43723179
chr10	44402547	44402832
chr10	44805647	44805794
chr10	44806012	44806271
chr10	45637699	45637812
chr10	45637923	45638111
chr10	45717926	45718087
chr10	45719949	45720139
chr10	45720363	45720745
chr10	45891480	45891629
chr10	46171394	46171770
chr10	46172495	46172935
chr10	46175827	46175971
chr10	46176157	46176362
chr10	46181969	46182434
chr10	46348113	46348319
chr10	46573905	46574951
chr10	46575032	46575328
chr10	46575592	46575674
chr10	46576883	46577551
chr10	46577672	46578207
chr11	29628	29987
chr11	82207	82348
chr11	85117	86120
chr11	496128	496265
chr11	554647	554870
chr11	644167	644350
chr11	734701	734926
chr11	884025	884256
chr11	1846457	1846914
chr11	2307577	2307864
chr11	2308104	2308215
chr11	2316538	2316833
chr11	2411209	2411346
chr11	2695995	2696117
chr11	3833364	3833699
chr11	4012366	4012578
chr11	4094823	4094987
chr11	5256440	5256698
chr11	5486668	5486906
chr11	5779572	5779908
chr11	5850395	5850604
chr11	5850740	5851162
chr11	6128507	6128717
chr11	6151143	6151520
chr11	6226690	6226843
chr11	6330596	6330799
chr11	6537975	6538239
chr11	6569843	6570227
chr11	6573578	6574091
chr11	6589375	6589592
chr11	6706866	6706963
chr11	6707178	6707407
chr11	6724233	6724610
chr11	6784590	6784768
chr11	7116678	7116940
chr11	7123934	7124100
chr11	7173928	7174317
chr11	7725820	7725984
chr11	7726084	7726261
chr11	8313866	8314033
chr11	8314631	8314750
chr11	8723688	8724124
chr11	8737930	8738212
chr11	9577718	9578034
chr11	10606439	10606546
chr11	10621104	10621228
chr11	10861597	10861957
chr11	10862574	10862655
chr11	11106506	11106674
chr11	11239833	11239987
chr11	11240138	11240378
chr11	11339772	11339901
chr11	11699071	11699197
chr11	11863225	11863480
chr11	11868457	11868736
chr11	11872064	11872259
chr11	11947835	11947972
chr11	12018182	12018304
chr11	12043694	12043837
chr11	12281764	12282088
chr11	12282225	12282389
chr11	12283001	12283320
chr11	13312299	13312684
chr11	13337629	13337977
chr11	13720455	13720555
chr11	13751476	13751636
chr11	13779672	13780032
chr11	15636507	15636654
chr11	15782965	15783497
chr11	16677332	16677573
chr11	16693700	16693896
chr11	16849848	16850110
chr11	16866384	16866616
chr11	16889484	16889644
chr11	16952990	16953081
chr11	18309784	18309920
chr11	18463490	18463656
chr11	18464033	18464401
chr11	18578486	18578722
chr11	18636428	18636591
chr11	18643270	18643695
chr11	18646237	18646566
chr11	18804622	18804963
chr11	18814202	18814272
chr11	19026641	19026781
chr11	19079459	19079695
chr11	19137851	19138343
chr11	19146783	19147268
chr11	19202908	19203038
chr11	19220575	19220820
chr11	19236579	19236767
chr11	19238954	19239147
chr11	19292941	19293044
chr11	19315968	19316198
chr11	19316629	19316918
chr11	19321884	19322368
chr11	19329869	19330005
chr11	19330833	19331046
chr11	19331271	19331382
chr11	19462263	19462445
chr11	19462508	19462720
chr11	20114604	20114760
chr11	20294834	20294979
chr11	22013133	22013414
chr11	22050118	22050349
chr11	22057829	22058032
chr11	22096804	22096967
chr11	22098670	22098997
chr11	22107713	22107904
chr11	22776723	22777005
chr11	22923292	22923443
chr11	23972809	23973254
chr11	23987180	23987414
chr11	23987599	23987730
chr11	24014125	24014343
chr11	24019524	24019645
chr11	24019726	24019845
chr11	24337429	24337719
chr11	24338605	24338977
chr11	24388834	24389472
chr11	24577123	24577315
chr11	24965298	24965707
chr11	24976807	24977076
chr11	24992034	24992271
chr11	25662838	25663062
chr11	25958092	25958219
chr11	25968757	25968992
chr11	25970504	25970671
chr11	26179651	26179959
chr11	26307495	26307672
chr11	26389610	26389824
chr11	26488238	26488741
chr11	26668135	26668346
chr11	26786697	26786929
chr11	26862457	26862741
chr11	26864051	26864523
chr11	26864630	26864866
chr11	27260849	27261100
chr11	27578853	27579051
chr11	27579073	27579279
chr11	27686836	27687070
chr11	28067329	28067917
chr11	28477700	28477851
chr11	28704272	28704419
chr11	29367680	29368142
chr11	29371800	29371947
chr11	29502536	29502738
chr11	30465873	30466319
chr11	30641168	30641398
chr11	30813148	30813873
chr11	30821872	30822042
chr11	30912203	30912269
chr11	31432855	31433111
chr11	31509587	31509815
chr11	31510215	31510415
chr11	31970070	31970176
chr11	33244821	33245028
chr11	34536881	34537069
chr11	35207806	35208003
chr11	35463527	35463781
chr11	35476183	35476392
chr11	35476736	35476916
chr11	35924621	35924836
chr11	36233709	36233879
chr11	36572551	36572843
chr11	36603167	36603382
chr11	36621580	36621793
chr11	36662211	36662439
chr11	36861339	36861638
chr11	38129342	38129486
chr11	39071727	39072129
chr11	40567031	40567669
chr11	40992054	40992419
chr11	40992525	40992690
chr11	41604619	41605063
chr11	41933070	41933314
chr11	42234703	42234980
chr11	42258835	42258992
chr11	42275356	42275660
chr11	42308633	42309040
chr11	43231632	43231700
chr11	43368800	43368917
chr11	43397698	43397892
chr11	43471714	43472062
chr11	43925114	43925201
chr11	44252716	44252992
chr11	44483196	44483278
chr11	44488024	44488766
chr11	44489035	44489136
chr11	45221212	45221349
chr11	45232956	45233260
chr11	45513371	45513712
chr11	45516293	45516702
chr11	45520138	45520668
chr11	45525673	45526289
chr11	45526595	45526957
chr11	45542135	45542535
chr11	45544128	45544612
chr11	45567540	45567722
chr11	45578969	45579398
chr11	45605434	45605797
chr11	46098909	46099233
chr11	46237135	46237358
chr11	46254886	46255247
chr11	46359497	46361666
chr12	464390	464690
chr12	464737	465110
chr12	825351	825502
chr12	895322	895521
chr12	911361	911738
chr12	983192	983382
chr12	2188347	2188956
chr12	2189151	2189345
chr12	2198280	2198467
chr12	2444645	2444765
chr12	3639774	3639865
chr12	3739956	3740220
chr12	3980145	3980430
chr12	3980726	3980917
chr12	4605484	4605622
chr12	4929415	4929701
chr12	4929818	4929947
chr12	4982649	4982941
chr12	5120509	5120624
chr12	5447083	5447442
chr12	5590039	5590310
chr12	5591516	5591706
chr12	5752056	5752221
chr12	5886005	5886244
chr12	5886332	5886680
chr12	5929737	5929871
chr12	6047244	6047747
chr12	6560147	6560349
chr12	6604934	6605226
chr12	7877963	7878254
chr12	7906497	7907111
chr12	8193243	8193697
chr12	8633985	8634099
chr12	8901592	8901866
chr12	8903589	8903901
chr12	9323857	9324141
chr12	9425318	9425833
chr12	9465751	9466023
chr12	9482326	9482571
chr12	9482726	9483283
chr12	9524611	9524787
chr12	9524913	9525122
chr12	9607593	9607752
chr12	10225348	10225502
chr12	10237128	10237450
chr12	10770753	10770940
chr12	11141916	11142156
chr12	11554572	11554754
chr12	12420051	12420223
chr12	12455872	12456258
chr12	12948919	12949096
chr12	12949247	12949551
chr12	12968552	12968694
chr12	13152984	13153088
chr12	14090159	14090273
chr12	14245955	14246122
chr12	14733549	14733887
chr12	14734911	14735075
chr12	14849269	14849600
chr12	15209754	15209894
chr12	15225586	15225857
chr12	16087895	16088108
chr12	16416088	16416264
chr12	16513553	16513751
chr12	17828800	17828886
chr12	18109583	18109814
chr12	18160392	18160681
chr12	18202979	18203099
chr12	18203211	18203394
chr12	18222208	18222508
chr12	18230816	18231036
chr12	18231749	18231967
chr12	18237850	18237993
chr12	18326319	18326625
chr12	18487303	18487519
chr12	18584846	18585004
chr12	18664272	18664499
chr12	18891408	18891561
chr12	18891652	18892019
chr12	20963082	20963346
chr12	21276364	21276426
chr12	21642908	21643043
chr12	21791673	21792009
chr12	21809806	21809978
chr12	22010820	22011013
chr12	23373218	23373446
chr12	23632611	23632821
chr12	23653758	23653930
chr12	23754801	23754950
chr12	24612205	24612318
chr12	24915528	24915871
chr12	25076507	25076817
chr12	25081295	25081544
chr12	26755236	26755370
chr12	26886844	26887172
chr12	26897595	26897896
chr12	27281432	27281652
chr12	27305525	27305851
chr12	27538671	27539185
chr12	28048048	28048156
chr12	28141055	28141176
chr12	28361560	28361955
chr12	28487626	28487914
chr12	28815759	28816053
chr12	28818901	28819213
chr12	28819378	28819598
chr12	29122570	29122750
chr12	29137070	29137202
chr12	29331531	29331697
chr12	30117491	30117629
chr12	30334762	30335104
chr12	30335272	30335397
chr12	30341500	30341589
chr12	30341802	30341926
chr12	30342864	30343253
chr12	30490605	30490998
chr12	31626057	31626292
chr12	31669797	31669995
chr12	31805407	31805706
chr12	31936152	31936314
chr12	31946371	31946477
chr12	31951882	31952227
chr12	32218324	32218431
chr12	32369740	32370299
chr12	33362499	33362949
chr12	33367399	33367534
chr12	33379345	33379457
chr12	34120067	34120134
chr12	34409311	34409473
chr12	35087864	35088029
chr12	35275742	35275940
chr12	35278102	35278326
chr12	35281692	35281817
chr12	35743049	35743152
chr12	36439504	36439693
chr12	36583641	36583803
chr12	36688347	36688742
chr12	36756012	36756356
chr12	36884011	36884267
chr12	36977015	36977275
chr12	38133791	38134001
chr12	38134565	38134695
chr12	38137199	38137383
chr12	38957226	38957361
chr12	38966043	38966414
chr12	38976624	38976990
chr12	38978335	38978651
chr12	38981908	38982132
chr12	40263075	40263202
chr12	43135417	43135553
chr12	43163093	43163505
chr12	43414703	43415021
chr12	44526995	44527078
chr12	45995015	45995068
chr12	46611304	46611716
chr12	47028656	47028882
chr12	47029389	47029552
chr12	47729067	47729223
chr12	47733676	47734131
chr12	48920427	48921114
chr12	48949881	48950197
chr12	49481243	49481653
chr12	49586282	49586613
chr12	49587894	49588724
chr12	49754976	49755115
chr12	49799920	49800464
chr12	49800853	49801292
chr12	49905499	49905638
chr12	50249784	50250044
chr13	198742	198951
chr13	289883	290014
chr13	444563	445003
chr13	462979	463564
chr13	1025111	1025214
chr13	1030558	1030696
chr13	1032841	1033160
chr13	1056466	1056560
chr13	1058698	1058862
chr13	1064507	1064635
chr13	1065080	1065463
chr13	1338818	1339062
chr13	1495271	1495405
chr13	1891632	1891820
chr13	1990668	1990801
chr13	2053592	2053860
chr13	2155387	2155533
chr13	2292978	2293167
chr13	2314767	2314881
chr13	2920962	2921157
chr13	3028890	3028995
chr13	3567743	3567929
chr13	4025524	4025827
chr13	4166577	4166752
chr13	4821633	4821788
chr13	4886127	4886641
chr13	5183859	5184019
chr13	5184659	5184969
chr13	5191791	5191869
chr13	5192346	5192697
chr13	5493798	5493963
chr13	5520404	5520890
chr13	5839345	5839639
chr13	6262105	6262210
chr13	7592123	7592318
chr13	7657633	7657939
chr13	8204557	8204717
chr13	8204812	8204991
chr13	8206001	8206478
chr13	8208974	8209216
chr13	8209502	8209679
chr13	8978267	8978558
chr13	9075564	9075647
chr13	9078619	9078876
chr13	9107806	9108204
chr13	9145837	9145907
chr13	9147115	9147190
chr13	9234718	9234848
chr13	9654009	9654656
chr13	9658234	9658651
chr13	9775289	9775413
chr13	11268604	11268733
chr13	11537172	11537298
chr13	12535518	12535841
chr13	12536105	12536406
chr13	12896233	12896488
chr13	13149649	13149853
chr13	13265999	13266113
chr13	13930835	13930969
chr13	14969727	14969838
chr13	16569793	16569911
chr13	16570169	16570370
chr13	17017137	17017248
chr13	17173915	17174238
chr13	17174622	17174815
chr13	17803114	17803264
chr13	18267926	18268061
chr13	18394742	18394936
chr13	18581779	18582038
chr13	18614840	18615059
chr13	18864623	18864773
chr13	19401093	19401591
chr13	19413035	19413157
chr13	19459476	19459656
chr13	19554581	19554818
chr13	20109789	20109923
chr13	20861324	20861639
chr13	21807389	21807769
chr13	21812204	21812383
chr13	21944280	21944690
chr13	22295306	22295417
chr13	22396093	22396262
chr13	22436066	22436424
chr13	22436920	22437190
chr13	22438143	22438316
chr13	22454621	22454808
chr13	22815294	22815546
chr13	22839205	22839349
chr13	22845474	22845650
chr13	22848399	22848582
chr13	22911636	22912073
chr13	23114978	23115111
chr13	23145138	23145383
chr13	23182518	23182653
chr13	23183351	23183474
chr13	23884509	23884774
chr13	24467857	24468198
chr13	24713464	24713698
chr13	24726930	24727039
chr13	24727327	24727462
chr13	25106122	25106324
chr13	25471948	25472122
chr13	25495728	25495903
chr13	25496262	25496379
chr13	25500606	25500751
chr13	25510859	25510968
chr13	25950609	25950699
chr13	25971760	25971909
chr13	25973659	25973830
chr13	26023817	26024197
chr13	26024434	26024534
chr13	26119710	26119858
chr13	26184892	26185294
chr13	26475030	26475182
chr13	27264663	27264917
chr13	27266185	27266378
chr13	27266862	27267038
chr13	27468455	27468652
chr13	27998737	27998885
chr13	28523067	28523237
chr13	28931361	28931590
chr13	29066568	29066752
chr13	30374032	30374225
chr13	30841305	30841528
chr13	31612310	31612506
chr13	31886950	31887099
chr13	32664953	32665308
chr13	32859433	32859599
chr13	32898538	32898756
chr13	33116247	33116428
chr13	33420606	33420771
chr13	33830975	33831242
chr13	33831350	33831515
chr13	33895635	33895831
chr13	34004566	34004679
chr13	35076483	35076582
chr13	35079310	35079524
chr13	35100019	35100132
chr13	35398343	35398725
chr13	35428473	35428677
chr13	35632292	35632624
chr13	35685310	35685952
chr13	35687940	35688234
chr13	36171468	36171573
chr13	36179286	36179482
chr13	36179633	36179844
chr13	36302692	36302819
chr13	36357340	36357503
chr13	36400172	36400284
chr13	36410127	36410342
chr13	36422319	36422529
chr13	36422750	36422911
chr13	36433453	36433636
chr13	36622059	36622211
chr13	36727212	36727546
chr13	36759495	36760016
chr13	36956717	36957285
chr13	37062023	37062183
chr13	37082128	37082508
chr13	37144435	37144738
chr13	37145083	37145451
chr13	37563296	37563702
chr13	37631392	37631694
chr13	37667503	37667654
chr13	37816213	37816420
chr13	37848591	37848720
chr13	37866441	37866604
chr13	37995979	37996114
chr13	38569728	38569833
chr13	38646374	38646493
chr13	39888243	39888352
chr13	40783022	40783183
chr13	41436191	41436393
chr13	42632029	42632190
chr13	42659460	42659728
chr13	43320242	43320462
chr13	43360973	43361182
chr13	45463388	45463530
chr13	45642731	45642870
chr13	46152670	46152929
chr13	46722905	46723504
chr13	46803793	46804052
chr13	47037363	47037556
chr13	47135159	47135338
chr13	47310542	47310763
chr13	48015567	48015702
chr13	48069205	48069507
chr13	48069657	48069905
chr13	48487834	48487956
chr13	48663925	48664616
chr13	48669648	48670058
chr13	48871496	48871827
chr13	49439001	49439166
chr13	49724828	49724978
chr13	50229655	50229850
chr13	50233887	50234244
chr13	50342633	50343059
chr13	50346705	50347046
chr13	50385058	50385318
chr13	50419730	50419855
chr13	50419920	50420290
chr13	50424846	50425050
chr13	50440510	50440704
chr13	51982350	51982724
chr13	52137226	52137406
chr13	52156860	52157143
chr13	52268767	52268980
chr13	52563428	52563533
chr13	53621327	53621757
chr14	117010	117516
chr14	303045	303467
chr14	414423	414687
chr14	497487	497595
chr14	1179532	1179981
chr14	1181072	1181377
chr14	1641501	1641633
chr14	3429253	3429403
chr14	3767048	3767524
chr14	4279130	4279250
chr14	4485521	4485844
chr14	4616403	4616562
chr14	5656813	5656947
chr14	6293991	6294237
chr14	7015178	7015319
chr14	7106175	7106354
chr14	7107368	7107560
chr14	7189101	7189724
chr14	7199227	7199368
chr14	7313452	7313526
chr14	7455585	7455837
chr14	7861035	7861278
chr14	7930333	7930865
chr14	7996652	7996780
chr14	8053846	8054191
chr14	8067331	8067648
chr14	8411630	8411812
chr14	8411927	8412074
chr14	8414471	8414599
chr14	8434551	8434672
chr14	11615350	11615703
chr14	12081849	12081990
chr14	12271039	12271257
chr14	12327771	12327967
chr14	12332944	12333100
chr14	12697873	12698059
chr14	12699763	12700124
chr14	12700490	12700776
chr14	13710867	13711036
chr14	14274675	14274856
chr14	14968792	14968966
chr14	14969200	14969384
chr14	15165166	15165637
chr14	17213970	17214306
chr14	17734565	17734861
chr14	18543147	18543302
chr14	18544604	18544934
chr14	18550791	18550935
chr14	18645187	18645365
chr14	18726608	18726786
chr14	19690218	19690547
chr14	19714635	19714764
chr14	21848734	21848876
chr14	22068694	22069011
chr14	22188683	22188988
chr14	22303195	22303374
chr14	22843992	22844171
chr14	22937409	22937588
chr14	23087360	23087635
chr14	23103109	23103565
chr14	23299897	23300121
chr14	23300207	23300306
chr14	23321299	23321513
chr14	23564304	23564412
chr14	24681811	24681994
chr14	24700290	24700516
chr14	25414101	25414267
chr14	25467879	25467998
chr14	27043644	27043815
chr14	27176739	27176858
chr14	27187076	27187226
chr14	27238544	27238655
chr14	27442985	27443143
chr14	27740216	27740329
chr14	27740589	27740805
chr14	27763052	27763322
chr14	27775478	27775636
chr14	31643985	31644104
chr14	31999084	31999202
chr14	31999281	31999408
chr14	32443528	32443749
chr14	32621054	32621227
chr14	32732839	32732986
chr14	32736317	32736515
chr14	33454093	33454354
chr14	33654773	33654938
chr14	33773482	33773629
chr14	33774023	33774193
chr14	33774254	33774450
chr14	33941412	33941590
chr14	34163832	34163920
chr14	34252513	34253138
chr14	34491543	34491744
chr14	34492130	34492249
chr14	34492897	34493055
chr14	34514254	34514566
chr14	35428693	35428838
chr14	35984026	35984236
chr14	36059190	36059381
chr14	36530159	36530293
chr14	37167228	37167436
chr14	37493093	37493290
chr14	38420261	38420328
chr14	38821518	38822009
chr14	38843025	38843441
chr14	38852576	38852788
chr14	39029279	39029505
chr14	39034818	39035136
chr14	40140255	40140400
chr14	40147418	40147536
chr14	40170963	40171116
chr14	40174605	40174814
chr14	40176742	40177054
chr14	40184210	40184499
chr14	40184796	40184888
chr14	40192561	40192698
chr14	40247381	40247492
chr14	40442941	40443326
chr14	40557672	40557780
chr14	40558181	40558301
chr14	42122107	42122299
chr14	42140149	42140765
chr14	42141679	42141792
chr14	42142814	42143293
chr14	42143368	42143676
chr14	42168190	42168551
chr14	42793926	42794142
chr14	42878519	42878711
chr14	42985602	42985807
chr14	43503699	43503846
chr14	43508607	43508851
chr14	43510093	43510558
chr14	45145185	45145427
chr14	45285580	45285734
chr14	46263546	46263759
chr14	47632426	47632814
chr14	47677424	47677640
chr14	47697696	47698019
chr14	47698756	47698925
chr14	48964107	48964212
chr14	49130051	49130237
chr14	49149669	49150026
chr14	49151410	49151499
chr14	49151562	49151965
chr14	51169468	51169761
chr14	51169966	51170244
chr14	51174999	51175250
chr14	51175381	51175508
chr14	51645784	51646227
chr14	52534080	52534529
chr14	52915492	52915669
chr14	53506907	53507376
chr14	53521422	53521968
chr14	53522057	53522173
chr14	53527542	53527987
chr15	30394	30905
chr15	71244	71570
chr15	71734	71850
chr15	79845	80207
chr15	103364	103650
chr15	135182	135357
chr15	136602	136730
chr15	301348	301819
chr15	301910	302427
chr15	507722	508525
chr15	514874	515593
chr15	710029	710161
chr15	1182822	1183104
chr15	2410829	2411291
chr15	2616954	2617073
chr15	2625543	2625842
chr15	2629128	2629365
chr15	2631496	2631588
chr15	2632015	2632400
chr15	2640034	2640313
chr15	2643665	2644127
chr15	3048437	3049084
chr15	3501862	3502000
chr15	3566497	3566741
chr15	3566871	3567033
chr15	3615961	3616122
chr15	3622466	3622573
chr15	3750763	3750979
chr15	3754018	3754207
chr15	4003966	4004132
chr15	4216984	4217202
chr15	4312630	4312860
chr15	4404485	4404793
chr15	4407838	4407987
chr15	4418972	4419350
chr15	5924364	5924499
chr15	7128379	7128551
chr15	8858647	8859108
chr15	8873389	8873847
chr15	8975398	8975538
chr15	9546370	9546688
chr15	10076552	10076679
chr15	10134128	10134269
chr15	10196162	10196312
chr15	11475010	11475201
chr15	11828235	11828366
chr15	11936589	11936835
chr15	12177811	12178015
chr15	13025594	13025723
chr15	13029147	13029589
chr15	13045615	13045794
chr15	13786466	13786764
chr15	13987225	13987381
chr15	14005442	14005555
chr15	14502342	14502430
chr15	14510388	14510500
chr15	14523966	14524113
chr15	14925241	14925449
chr15	15720814	15721296
chr15	15898294	15898416
chr15	17444083	17444281
chr15	18789500	18789624
chr15	18791497	18791833
chr15	19178970	19179171
chr15	19189226	19189343
chr15	19204339	19204547
chr15	19475428	19475691
chr15	19685359	19685556
chr15	20728956	20729200
chr15	20742437	20742698
chr15	20975416	20975641
chr15	20987814	20988017
chr15	21410196	21410337
chr15	21412908	21413102
chr15	21791932	21792215
chr15	22790623	22790986
chr15	22797083	22797271
chr15	22850051	22850146
chr15	23082675	23083000
chr15	23094053	23094358
chr15	23094422	23094754
chr15	23917126	23917373
chr15	23967665	23967828
chr15	24110347	24110581
chr15	24156301	24156422
chr15	24268990	24269131
chr15	24274244	24274400
chr15	24283388	24283692
chr15	24295471	24295770
chr15	24743506	24743631
chr15	24755006	24755225
chr15	24865564	24865871
chr15	24925877	24926300
chr15	26103645	26103834
chr15	26179405	26180063
chr15	26182483	26182649
chr15	27622731	27623045
chr15	27640467	27641101
chr15	27644446	27644594
chr15	27648963	27649214
chr15	27654196	27654575
chr15	27734274	27734434
chr15	27759168	27759676
chr15	27899400	27899529
chr15	27921754	27921889
chr15	28460314	28460451
chr15	28465111	28465358
chr15	28466194	28466350
chr15	28625488	28625768
chr15	28722872	28723107
chr15	29028940	29029069
chr15	29029077	29029184
chr15	29482590	29482826
chr15	30364062	30364305
chr15	30444540	30444901
chr15	30446757	30446908
chr15	31790073	31790215
chr15	31909301	31909414
chr15	31909523	31909682
chr15	31910046	31910291
chr15	33907683	33907813
chr15	33994722	33994952
chr15	33995639	33995974
chr15	34188903	34189116
chr15	34259512	34259779
chr15	34268451	34268694
chr15	34868439	34868951
chr15	35125818	35126323
chr15	35136717	35136922
chr15	35650238	35650349
chr15	35651836	35652221
chr15	36436320	36436462
chr15	36940176	36940379
chr15	36959038	36959315
chr15	38696990	38697196
chr15	38712039	38712412
chr15	38766890	38766992
chr15	38997304	38997576
chr15	40761559	40761929
chr15	40762031	40762104
chr15	40789372	40789661
chr15	40789989	40790196
chr15	41088663	41089151
chr15	41102086	41102537
chr15	41103126	41103236
chr15	41103676	41103915
chr15	41713143	41713557
chr15	41760498	41760668
chr15	42232979	42233206
chr15	42233364	42233679
chr15	42275316	42275696
chr15	42861883	42861988
chr15	42867694	42867799
chr15	45122456	45122624
chr15	45122943	45123107
chr15	45306050	45306246
chr15	45620209	45620414
chr15	45653345	45653619
chr15	45656314	45656512
chr15	45676841	45676925
chr15	45688410	45688609
chr15	45700010	45700333
chr15	45700582	45700864
chr15	46627989	46628251
chr15	46677138	46677533
chr15	46707150	46707439
chr15	46872612	46872755
chr15	46883052	46883287
chr15	46883385	46883801
chr15	46905994	46906127
chr15	46906270	46906358
chr16	23210	23494
chr16	77660	78522
chr16	78962	79272
chr16	107812	108104
chr16	814200	814413
chr16	1328018	1328329
chr16	1646841	1646972
chr16	1699426	1699655
chr16	2236301	2236435
chr16	3078224	3078323
chr16	3165382	3165496
chr16	3316242	3316411
chr16	4965623	4965793
chr16	4985265	4985441
chr16	5070482	5070691
chr16	5559011	5559440
chr16	6527151	6527350
chr16	6622756	6622944
chr16	7091853	7091996
chr16	7092060	7092208
chr16	7642693	7642870
chr16	8231236	8231456
chr16	8701926	8702425
chr16	8763444	8763778
chr16	8784009	8784377
chr16	8838249	8838414
chr16	8942585	8942868
chr16	8977578	8977813
chr16	9010164	9010375
chr16	9829369	9829553
chr16	11144013	11144125
chr16	11424260	11424669
chr16	11669290	11669443
chr16	12032089	12032358
chr16	12221552	12221756
chr16	12284114	12284273
chr16	12461176	12461402
chr16	12540491	12540664
chr16	14327554	14327985
chr16	15175757	15176038
chr16	16910182	16910447
chr16	16919132	16919290
chr16	16919574	16919774
chr16	17546654	17546837
chr16	18432902	18433153
chr16	18454834	18454998
chr16	18462777	18463168
chr16	18524750	18525062
chr16	18558419	18558552
chr16	18904394	18904610
chr16	18915083	18915344
chr16	18918884	18918987
chr16	18926260	18926450
chr16	18933692	18933896
chr16	19030630	19030779
chr16	19118217	19118403
chr16	19776521	19776633
chr16	19776876	19777058
chr16	19777679	19777793
chr16	19777940	19778471
chr16	20339194	20339517
chr16	20456771	20457178
chr16	20811708	20811940
chr16	21108272	21108455
chr16	21118210	21118490
chr16	21148516	21148739
chr16	21387112	21387407
chr16	21644496	21644769
chr16	21658031	21658261
chr16	21973583	21973789
chr16	22544072	22544229
chr16	23108907	23109043
chr16	23128278	23128435
chr16	23128564	23128676
chr16	23146195	23146600
chr16	23496565	23496658
chr16	23827923	23828155
chr16	23919354	23919574
chr16	24357964	24358157
chr16	24481103	24481271
chr16	24490090	24490472
chr16	24743310	24743483
chr16	24798476	24798929
chr16	24889960	24890212
chr16	24890714	24890961
chr16	24894018	24894109
chr16	25044363	25044578
chr16	25170221	25170397
chr16	25502927	25503147
chr16	25513824	25513949
chr16	25523611	25523861
chr16	25524464	25524858
chr16	25630190	25630364
chr16	25640595	25640806
chr16	25641149	25641287
chr16	25642816	25642946
chr16	25667154	25667283
chr16	26757077	26757494
chr16	26757779	26758007
chr16	26789100	26789155
chr16	26790501	26790794
chr16	26854084	26854303
chr16	26854411	26854628
chr16	26894456	26894589
chr16	26915411	26915645
chr16	26925177	26925462
chr16	26927912	26928213
chr16	26929618	26929908
chr16	27867507	27867681
chr16	27949889	27950298
chr16	27955767	27955945
chr16	27956691	27956815
chr16	27978892	27979117
chr16	27999436	27999970
chr16	28448825	28449036
chr16	28690060	28690346
chr16	28797633	28797840
chr16	28841982	28842123
chr16	28858998	28859122
chr16	28897718	28898051
chr16	28898865	28899126
chr16	28899293	28899502
chr16	28927402	28927772
chr16	28935614	28935706
chr16	28937563	28937781
chr16	28938041	28938238
chr16	28938412	28938584
chr16	28938687	28938821
chr16	29145703	29146045
chr16	29245218	29245561
chr16	29508578	29508757
chr16	29512721	29512830
chr16	29772225	29772519
chr16	30638881	30639190
chr16	30930376	30930533
chr16	30982634	30982777
chr16	31390286	31390623
chr16	31649262	31649483
chr16	31862566	31862763
chr16	31871997	31872078
chr16	31878757	31878896
chr16	31909178	31909376
chr16	31956756	31957069
chr16	32353293	32353460
chr16	32363667	32363848
chr16	32368124	32368239
chr16	32410462	32410685
chr16	32441564	32441946
chr16	32442270	32442475
chr16	32867793	32868013
chr16	32870351	32870510
chr16	33150391	33150629
chr16	33304247	33304356
chr16	33627112	33627345
chr16	33655199	33655585
chr16	33779945	33780199
chr16	33781366	33781495
chr16	33802026	33802210
chr16	33805309	33805666
chr16	34174955	34175079
chr16	34255480	34255781
chr16	34256905	34257088
chr16	34290668	34290843
chr16	34290977	34291126
chr16	34350922	34350988
chr16	34447411	34447832
chr16	34495420	34495587
chr16	35457148	35457353
chr16	35587699	35587798
chr16	38744205	38744615
chr16	39654241	39654406
chr16	39728870	39729094
chr16	39900516	39900669
chr16	39902611	39902828
chr16	39914045	39914277
chr16	40866813	40867047
chr16	40924075	40924275
chr16	40942299	40942607
chr16	42079953	42080086
chr16	42205228	42205448
chr16	42806898	42807058
chr16	43621941	43622164
chr16	44447238	44447393
chr16	44553476	44553594
chr16	44554150	44554264
chr16	44559486	44559724
chr16	44778575	44778936
chr16	45074891	45075004
chr16	45618669	45618835
chr16	45981254	45981475
chr16	46195688	46195889
chr16	46199063	46199257
chr16	46233429	46233582
chr16	46249835	46250057
chr16	46250160	46250297
chr16	46819217	46819440
chr16	47928037	47928128
chr16	48480292	48480767
chr16	48480932	48481481
chr16	48790683	48790874
chr16	49370792	49371111
chr16	49375803	49376199
chr16	49473813	49473942
chr16	49474213	49474328
chr16	49649614	49649719
chr16	49734391	49734638
chr16	49741007	49741161
chr16	49826091	49826345
chr16	49994000	49994169
chr16	49997944	49998254
chr16	50003479	50003786
chr16	50003996	50004060
chr16	50591825	50592224
chr16	51948331	51948498
chr16	54745936	54746068
chr16	54889159	54889358
chr16	54914138	54914301
chr16	54940662	54941036
chr16	55009176	55009267
chr16	55049201	55049445
chr16	55113654	55113916
chr16	56422191	56422583
chr16	56518158	56518576
chr16	57056607	57056803
chr16	57371938	57372011
chr16	57393260	57393783
chr16	57441129	57441417
chr16	57846950	57847140
chr16	57879778	57880053
chr16	58037297	58037605
chr16	58038399	58038568
chr16	58412553	58412818
chr16	58443187	58443385
chr16	58674383	58674557
chr16	58676156	58676528
chr16	58676607	58676745
chr17	863234	863599
chr17	878962	879680
chr17	1003010	1003274
chr17	1033992	1034265
chr17	1419650	1419939
chr17	1522660	1522843
chr17	2405604	2405924
chr17	4017964	4018080
chr17	4915980	4916199
chr17	5366003	5366444
chr17	5621417	5621597
chr17	5621862	5622016
chr17	6191620	6191999
chr17	6225803	6225938
chr17	6272094	6272334
chr17	7188718	7188863
chr17	8227305	8227632
chr17	8229691	8229989
chr17	8437943	8438095
chr17	9814340	9814596
chr17	9870044	9870205
chr17	10062589	10062851
chr17	10079897	10080072
chr17	10649898	10650305
chr17	10667878	10668024
chr17	10670823	10671081
chr17	10698244	10698387
chr17	11327144	11327343
chr17	11397327	11397505
chr17	11957672	11957759
chr17	11957927	11958141
chr17	12854182	12854519
chr17	12860772	12860963
chr17	14433420	14433741
chr17	14434124	14434352
chr17	14895630	14895753
chr17	14899638	14899758
chr17	14904261	14904628
chr17	14904763	14904940
chr17	15554398	15554621
chr17	15613812	15613966
chr17	15761066	15761174
chr17	15761357	15761519
chr17	15950461	15950727
chr17	16072915	16073160
chr17	16077326	16077478
chr17	16077760	16077913
chr17	16599579	16599799
chr17	17457138	17457296
chr17	17626066	17626173
chr17	17646563	17646759
chr17	17676047	17676262
chr17	17834293	17834413
chr17	17837461	17837543
chr17	17965316	17965493
chr17	18042239	18042457
chr17	19572650	19573313
chr17	20339117	20339262
chr17	20399752	20400251
chr17	20400621	20400705
chr17	20405649	20405853
chr17	20727480	20727757
chr17	21022850	21022998
chr17	21070077	21070357
chr17	21282188	21282462
chr17	22382624	22382821
chr17	22390550	22390762
chr17	22392162	22392449
chr17	22396902	22397212
chr17	22430512	22430924
chr17	22432799	22433023
chr17	23302659	23302914
chr17	23387018	23387095
chr17	23691444	23691613
chr17	24260936	24261400
chr17	24379637	24379872
chr17	24380107	24380343
chr17	24675544	24675822
chr17	24689413	24689693
chr17	24717875	24718149
chr17	25050127	25050320
chr17	25363805	25364144
chr17	25697158	25697310
chr17	25701710	25701929
chr17	25737180	25737422
chr17	26593686	26593872
chr17	26600638	26600827
chr17	26620797	26621004
chr17	26709551	26709774
chr17	26752960	26753098
chr17	26776914	26777092
chr17	26789376	26789759
chr17	26800119	26800335
chr17	26806857	26807057
chr17	26816045	26816296
chr17	26889707	26889983
chr17	26890057	26890380
chr17	27784011	27784168
chr17	27787696	27788145
chr17	28026083	28026185
chr17	28166215	28166388
chr17	28166527	28166655
chr17	28214980	28215104
chr17	28767231	28767520
chr17	28768301	28768535
chr17	29400374	29400542
chr17	29871979	29872146
chr17	30440021	30440180
chr17	30561692	30562092
chr17	30562251	30562399
chr17	30711815	30711978
chr17	30855933	30856001
chr17	30953478	30953828
chr17	30955621	30955713
chr17	31402792	31402994
chr17	31403189	31403630
chr17	31424975	31425084
chr17	31425705	31425955
chr17	31836796	31837039
chr17	32580582	32580835
chr17	32581490	32581579
chr17	32617131	32617385
chr17	32629358	32629613
chr17	32629756	32629903
chr17	32631728	32631870
chr17	32631965	32632291
chr17	32665539	32665633
chr17	32716056	32716324
chr17	33581082	33581221
chr17	33621723	33621912
chr17	35061560	35061728
chr17	35063986	35064412
chr17	35155135	35155378
chr17	35173363	35173589
chr17	35399085	35399252
chr17	36716187	36716294
chr17	37003273	37003501
chr17	37426055	37426171
chr17	37485874	37486085
chr17	37517445	37517597
chr17	37548406	37548607
chr17	37861380	37861527
chr17	37919290	37919393
chr17	37938396	37938573
chr17	37947521	37948102
chr17	37948119	37948408
chr17	38076142	38076248
chr17	38367594	38367757
chr17	38737559	38737725
chr17	38738053	38738284
chr17	39909350	39909539
chr17	41419364	41419468
chr17	41432101	41432375
chr17	41665000	41665154
chr17	41914461	41914638
chr17	42129128	42129337
chr17	42849216	42849293
chr17	43396457	43396624
chr17	43430984	43431088
chr17	43792128	43792992
chr17	44139588	44139720
chr17	44469938	44470017
chr17	45821730	45821938
chr17	45888555	45888743
chr17	45892052	45892256
chr17	45962659	45962797
chr17	45962959	45963147
chr17	45971065	45971251
chr17	45973711	45973798
chr17	45975045	45975380
chr17	45975460	45975762
chr17	46004435	46004599
chr17	46084626	46084888
chr17	46094961	46095139
chr17	46095784	46095962
chr17	46522996	46523083
chr17	48979397	48979616
chr17	49334066	49334285
chr17	51186138	51186569
chr17	51186784	51187062
chr17	51187398	51187620
chr17	51199016	51199328
chr17	51284929	51285076
chr17	51352139	51352312
chr17	52179015	52179290
chr17	52397898	52398288
chr17	52410031	52410233
chr17	52412549	52412846
chr17	52414611	52414983
chr17	52424150	52424379
chr17	53813118	53813317
chr17	53864660	53864864
chr17	53915617	53916370
chr18	49594	52046
chr18	155855	156212
chr18	275674	276330
chr18	385743	386178
chr18	663700	663874
chr18	1105287	1105414
chr18	1105751	1105898
chr18	1383794	1384068
chr18	2177246	2177363
chr18	2188373	2188537
chr18	2509097	2509347
chr18	2513716	2513835
chr18	4803288	4803786
chr18	5001930	5002222
chr18	5387480	5387582
chr18	5616026	5616164
chr18	5638458	5638580
chr18	5638644	5638789
chr18	5641675	5641970
chr18	5841704	5841891
chr18	5884576	5884912
chr18	5888829	5889045
chr18	5889325	5889657
chr18	6845310	6845488
chr18	8355087	8355185
chr18	8770006	8770124
chr18	8984413	8984593
chr18	10254264	10254577
chr18	10265460	10265657
chr18	10266717	10266963
chr18	10268372	10268469
chr18	11583801	11584375
chr18	11621948	11622078
chr18	11624870	11624986
chr18	11762796	11762964
chr18	11763206	11763411
chr18	12045380	12045540
chr18	12357513	12357741
chr18	12523630	12523781
chr18	12530894	12531240
chr18	12564616	12564810
chr18	12826465	12826660
chr18	12945405	12945608
chr18	14058993	14059433
chr18	14746207	14746346
chr18	14774253	14774351
chr18	14774925	14775227
chr18	15456798	15456945
chr18	15460437	15460680
chr18	15520910	15521116
chr18	15694027	15694633
chr18	15782661	15782876
chr18	15924620	15924729
chr18	16553577	16553804
chr18	16575923	16576155
chr18	16645677	16645847
chr18	17566982	17567206
chr18	17801790	17801954
chr18	18072446	18072567
chr18	19492062	19492215
chr18	19663583	19663650
chr18	19794923	19795098
chr18	19985908	19986123
chr18	20164397	20164553
chr18	20167737	20168434
chr18	20168549	20168759
chr18	20171569	20171966
chr18	20851656	20851816
chr18	21712806	21713108
chr18	21880050	21880227
chr18	21880292	21880876
chr18	21887179	21887518
chr18	21887574	21887777
chr18	23144871	23144996
chr18	23671701	23671984
chr18	23975955	23976165
chr18	24099808	24099964
chr18	24175173	24175473
chr18	24696240	24696407
chr18	25391314	25391501
chr18	25529038	25529230
chr18	25536204	25536433
chr18	25989199	25989338
chr18	25990061	25990375
chr18	26803319	26803495
chr18	26804415	26804639
chr18	26939782	26939899
chr18	27114408	27114724
chr18	27119215	27119535
chr18	27557668	27557803
chr18	28471399	28471545
chr18	30191300	30191479
chr18	30320907	30321156
chr18	30376949	30377581
chr18	30552253	30552474
chr18	30653803	30653956
chr18	31144779	31144880
chr18	31686896	31687081
chr18	32936189	32936354
chr18	32954062	32954356
chr18	33081710	33081926
chr18	33126552	33127056
chr18	33237939	33238281
chr18	33687665	33687853
chr18	33791425	33791544
chr18	33791669	33791967
chr18	33799850	33800098
chr18	34972559	34972660
chr18	34972952	34973311
chr18	34983529	34983790
chr18	34995192	34995509
chr18	35366399	35366616
chr18	35446347	35446699
chr18	35708502	35708771
chr18	35731760	35732415
chr18	37187207	37187310
chr18	37219627	37219973
chr18	37222003	37222537
chr18	37227358	37227548
chr18	37237448	37237578
chr18	37264309	37264588
chr18	37418124	37418568
chr18	37547051	37547184
chr18	37547335	37547595
chr18	38268517	38268653
chr18	39147669	39147850
chr18	40636966	40637066
chr18	42387280	42387404
chr18	42537062	42537195
chr18	42717960	42718198
chr18	43144556	43144911
chr18	43322470	43322720
chr18	43352257	43352558
chr18	43975630	43976145
chr18	44080570	44080815
chr18	44119480	44119759
chr18	44221202	44221411
chr18	45830519	45830599
chr18	45837654	45837873
chr18	45899553	45899842
chr18	46636535	46636690
chr18	46651836	46652236
chr18	46662798	46663151
chr18	46887227	46887532
chr18	46889180	46889257
chr18	46925272	46925540
chr18	48795161	48795601
chr18	48799749	48800516
chr18	48835735	48835915
chr18	48853151	48853318
chr18	48870531	48870818
chr18	49537511	49537799
chr18	49640631	49641281
chr18	49868456	49868799
chr19	335147	335500
chr19	373686	374109
chr19	453528	453775
chr19	503018	503567
chr19	511029	511514
chr19	770540	770744
chr19	1264372	1264781
chr19	1512316	1512504
chr19	1638522	1638666
chr19	1638778	1639704
chr19	1845301	1845669
chr19	2439512	2439637
chr19	2440374	2440552
chr19	2535637	2535761
chr19	2551104	2551318
chr19	2552521	2552646
chr19	2896324	2896629
chr19	2903230	2903390
chr19	3042352	3042908
chr19	3339415	3339654
chr19	3340522	3340744
chr19	3340863	3341259
chr19	3491836	3491981
chr19	4583081	4583397
chr19	4673043	4673258
chr19	4684326	4684581
chr19	4693752	4694028
chr19	4828813	4828978
chr19	4890422	4890747
chr19	5972669	5972771
chr19	5976952	5977038
chr19	5982427	5982905
chr19	5988369	5988526
chr19	5988583	5989009
chr19	5994165	5994301
chr19	6007175	6007272
chr19	6009083	6009276
chr19	6028306	6028447
chr19	6035580	6035684
chr19	6046323	6046761
chr19	6330774	6331082
chr19	6331420	6331798
chr19	6334870	6334982
chr19	6392374	6392700
chr19	7356969	7357243
chr19	7394964	7395074
chr19	8043234	8043561
chr19	8192521	8192855
chr19	8197709	8197985
chr19	8233653	8233960
chr19	8236557	8236709
chr19	8351259	8351396
chr19	8354471	8354910
chr19	8583181	8583374
chr19	8590768	8590984
chr19	9163226	9163445
chr19	9458729	9458829
chr19	9574930	9575114
chr19	9632861	9633103
chr19	10289408	10289599
chr19	10290138	10290311
chr19	11054857	11055135
chr19	11071578	11072076
chr19	11494667	11494854
chr19	11510705	11511099
chr19	11609475	11609637
chr19	11686869	11687118
chr19	11875734	11875855
chr19	11876174	11876333
chr19	11920654	11920803
chr19	11998114	11998286
chr19	11998459	11998641
chr19	12013221	12013329
chr19	12015438	12015606
chr19	12025703	12025905
chr19	12609557	12609785
chr19	12618331	12618592
chr19	12682980	12683117
chr19	12776528	12776767
chr19	12856944	12857286
chr19	14657422	14657548
chr19	14657842	14658153
chr19	14717919	14718215
chr19	14851375	14851629
chr19	16830984	16831169
chr19	16833476	16833624
chr19	16834323	16834525
chr19	16834924	16835138
chr19	16835390	16835464
chr19	17595294	17595500
chr19	18463908	18464080
chr19	19053185	19053437
chr19	19053441	19053550
chr19	19242536	19242742
chr19	19342865	19343053
chr19	19571211	19571336
chr19	19832035	19832246
chr19	20132058	20132241
chr19	20141152	20141354
chr19	20175067	20175216
chr19	20176390	20176480
chr19	20176725	20176878
chr19	20176974	20177160
chr19	20180930	20181182
chr19	20181261	20181568
chr19	20191857	20192176
chr19	20465829	20465893
chr19	20470857	20471202
chr19	20471514	20471982
chr19	22501447	22501637
chr19	22875073	22875280
chr19	22878227	22878427
chr19	22892234	22892369
chr19	22892504	22892606
chr19	22969982	22970233
chr19	22976185	22976397
chr19	22980364	22980568
chr19	22982133	22982405
[truncated: 2,913 more rows]

## Sheet: 1c
chr1	78180	78297
chr1	268902	269155
chr1	273858	274077
chr1	510118	510314
chr1	512987	513532
chr1	513655	513796
chr1	519625	520109
chr1	558843	558949
chr1	559093	559474
chr1	723270	723365
chr1	765557	765798
chr1	777791	778040
chr1	779347	779679
chr1	881635	881791
chr1	929029	929327
chr1	1177043	1177343
chr1	1188184	1188445
chr1	1200952	1201077
chr1	1207854	1208125
chr1	1221793	1222053
chr1	1236784	1236952
chr1	1490234	1490322
chr1	1606046	1606156
chr1	1686072	1686345
chr1	2122884	2122978
chr1	2164437	2164581
chr1	3413719	3413909
chr1	3415686	3415976
chr1	3460867	3461108
chr1	3483131	3483610
chr1	3483759	3483867
chr1	3809520	3809635
chr1	4445553	4445757
chr1	4462492	4462626
chr1	4570157	4570307
chr1	5150555	5150773
chr1	5339485	5339805
chr1	5930388	5930516
chr1	6235138	6235279
chr1	6458696	6458860
chr1	6517310	6517440
chr1	7111391	7111528
chr1	7198161	7198423
chr1	7201581	7201690
chr1	7214804	7215052
chr1	7432491	7432863
chr1	7758897	7759027
chr1	7876912	7877078
chr1	7992608	7992778
chr1	8187354	8187683
chr1	8651600	8651897
chr1	8709741	8709820
chr1	9010545	9010712
chr1	9527519	9527643
chr1	9566891	9567273
chr1	9796110	9796298
chr1	9796514	9796765
chr1	10196807	10196925
chr1	10416026	10416278
chr1	10801555	10801626
chr1	10882707	10882783
chr1	10911726	10911841
chr1	10988044	10988248
chr1	11014230	11014330
chr1	11039366	11039437
chr1	11054160	11054310
chr1	11200548	11200712
chr1	11202789	11202989
chr1	11223217	11223348
chr1	11233885	11234016
chr1	11398467	11398593
chr1	11460175	11460313
chr1	11541116	11541205
chr1	11602436	11602550
chr1	11664437	11664534
chr1	11711813	11712091
chr1	11857353	11857567
chr1	12863362	12863545
chr1	12965626	12966049
chr1	13012281	13012412
chr1	13102233	13102356
chr1	13137731	13137930
chr1	13146403	13146562
chr1	13459932	13460414
chr1	13460550	13460832
chr1	13482080	13482404
chr1	13485440	13485560
chr1	13510484	13510548
chr1	13548717	13548900
chr1	13687177	13687310
chr1	13835354	13835476
chr1	13941762	13941877
chr1	13973631	13973751
chr1	14026823	14027033
chr1	14029938	14030176
chr1	15235764	15235947
chr1	15446479	15446573
chr1	15514855	15514959
chr1	16746555	16746684
chr1	16963819	16963981
chr1	17289746	17289947
chr1	17329122	17329333
chr1	17348275	17348457
chr1	17359448	17359583
chr1	17508615	17508734
chr1	17776284	17776462
chr1	18113601	18113877
chr1	18167045	18167173
chr1	18244193	18244346
chr1	18540001	18540108
chr1	19312900	19313067
chr1	19434845	19435058
chr1	19746350	19746545
chr1	19872167	19872310
chr1	20299402	20299473
chr1	20994028	20994192
chr1	21213825	21213942
chr1	21245279	21245543
chr1	21346382	21346476
chr1	21348698	21348791
chr1	21418551	21418712
chr1	21705062	21705233
chr1	21909818	21910231
chr1	22028466	22028576
chr1	22138728	22138836
chr1	22495636	22495741
chr1	22562790	22563114
chr1	22749137	22749343
chr1	23077903	23078033
chr1	23189756	23189976
chr1	23228146	23228353
chr1	23287876	23288048
chr1	23310841	23311022
chr1	23383218	23383415
chr1	23495425	23495611
chr1	23967013	23967137
chr1	24031335	24031481
chr1	24041543	24041769
chr1	24067243	24067349
chr1	24131848	24131926
chr1	24320455	24320578
chr1	24416787	24417066
chr1	24419672	24419755
chr1	24479430	24479586
chr1	24540846	24540959
chr1	24564519	24564736
chr1	25295603	25295803
chr1	25510310	25510475
chr1	25598521	25598666
chr1	26077765	26077947
chr1	27012439	27012797
chr1	27337666	27337871
chr1	27345284	27345355
chr1	28424918	28425036
chr1	28503442	28503622
chr1	29199845	29200109
chr1	29409575	29409847
chr1	29462090	29462197
chr1	29510373	29510525
chr1	29810362	29810587
chr1	30078469	30078759
chr1	30083078	30083353
chr1	30114013	30114184
chr1	30492500	30492646
chr1	30916296	30916440
chr1	31062483	31062627
chr1	31108891	31109070
chr1	31509112	31509298
chr1	32273617	32273719
chr1	32675649	32675803
chr1	32839040	32839256
chr1	32843055	32843160
chr1	32850000	32850153
chr1	32867645	32867768
chr1	32898845	32899092
chr1	33013472	33013680
chr1	33045193	33045349
chr1	33178294	33178368
chr1	33326428	33326644
chr1	33888355	33888541
chr1	33988435	33988693
chr1	34141964	34142100
chr1	34155962	34156120
chr1	34199564	34199683
chr1	34869371	34869480
chr1	35003869	35003962
chr1	35055492	35055643
chr1	35111503	35111641
chr1	35257509	35257678
chr1	35259327	35259580
chr1	36532293	36532541
chr1	36591316	36591377
chr1	36660115	36660262
chr1	37018707	37018807
chr1	37229309	37229426
chr1	37471464	37471522
chr1	37473092	37473313
chr1	37496347	37496524
chr1	37531001	37531086
chr1	37534282	37534399
chr1	37545455	37545569
chr1	37691765	37691985
chr1	37820667	37820874
chr1	37843874	37844023
chr1	37874150	37874329
chr1	37915688	37915830
chr1	38561893	38561994
chr1	38689906	38690138
chr1	38712920	38713273
chr1	38797693	38797892
chr1	38833036	38833180
chr1	39086860	39087188
chr1	39153913	39154042
chr1	40192464	40192648
chr1	40323374	40323600
chr1	40914217	40914573
chr1	40957384	40957584
chr1	40969854	40969945
chr1	41126202	41126341
chr1	41489063	41489154
chr1	41500930	41501137
chr1	41546708	41546832
chr1	41609688	41609987
chr1	41745401	41745569
chr1	41875925	41876102
chr1	42095958	42096073
chr1	42107734	42107906
chr1	42219995	42220097
chr1	42223654	42223848
chr1	42464272	42464433
chr1	42799594	42799659
chr1	43086258	43086456
chr1	43443797	43444013
chr1	43832329	43832690
chr1	44117235	44117643
chr1	44614527	44614584
chr1	44652035	44652282
chr1	44697272	44697431
chr1	44759579	44759926
chr1	44761693	44761960
chr1	44887513	44887599
chr1	44985188	44985413
chr1	44989999	44990154
chr1	45411793	45411940
chr1	45412080	45412200
chr1	45588820	45588911
chr1	45632805	45632980
chr1	45639205	45639343
chr1	45639463	45639621
chr1	45646995	45647111
chr1	46387904	46388098
chr1	46480932	46481061
chr1	46484812	46484971
chr1	46982740	46982914
chr1	47187990	47188431
chr1	47513884	47514038
chr1	47520036	47520138
chr1	47558180	47558398
chr1	48146575	48146719
chr1	48266347	48266475
chr1	49024329	49024561
chr1	49413659	49413728
chr1	49795536	49795880
chr1	49910220	49910475
chr1	50107647	50107772
chr1	50182244	50182368
chr1	50258940	50259080
chr1	51558725	51558890
chr1	51650471	51650619
chr1	51760019	51760325
chr1	51791107	51791257
chr1	52275397	52275930
chr1	52417139	52417332
chr1	52525560	52525751
chr1	52583093	52583214
chr1	52675333	52675489
chr1	52709168	52709367
chr1	52782036	52782134
chr1	52835549	52835711
chr1	52882158	52882248
chr1	52882626	52882760
chr1	52886974	52887223
chr1	52896725	52896976
chr1	52962293	52962385
chr1	53067547	53067752
chr1	53071102	53071330
chr1	53082918	53083072
chr1	53101393	53101488
chr1	53309564	53309707
chr1	53535617	53535727
chr1	53621238	53621334
chr1	54145186	54145622
chr1	54168316	54168494
chr1	54240702	54240887
chr1	54338337	54338423
chr1	54343231	54343330
chr1	54470527	54470618
chr1	54472988	54473107
chr1	54630467	54630629
chr1	54704432	54704566
chr1	54707184	54707360
chr1	55038323	55038452
chr1	55046580	55046695
chr1	55205940	55206041
chr1	55238296	55238744
chr1	55260869	55261043
chr1	55311340	55311545
chr1	55346920	55347120
chr1	55603580	55603991
chr1	55665971	55666249
chr1	55669245	55669380
chr1	55733000	55733128
chr1	55903409	55903706
chr1	56306522	56306619
chr1	56341255	56341385
chr1	56746717	56746854
chr1	56889753	56889945
chr1	57004546	57004713
chr1	57009376	57009511
chr1	57068210	57068474
chr1	57212938	57213197
chr1	57258672	57258790
chr1	57297583	57297662
chr1	57602748	57602913
chr1	57659479	57659631
chr1	57660827	57661168
chr1	57691709	57691909
chr1	57739271	57739685
chr1	57835234	57835305
chr1	57866668	57866763
chr1	57876836	57877100
chr1	57883793	57883940
chr1	57886467	57886629
chr1	57887010	57887175
chr1	57902364	57902419
chr1	58055207	58055289
chr1	58074704	58074845
chr1	58090597	58090665
chr1	58440249	58440440
chr1	58576593	58576795
chr1	58617707	58617903
chr1	58726054	58726169
chr1	58777985	58778051
chr1	58779377	58779467
chr1	59235039	59235230
chr1	59309930	59310003
chr1	59327416	59327737
chr1	59345081	59345300
chr1	59345563	59345772
chr1	59346344	59346452
chr1	59349820	59349890
chr1	59362273	59362455
chr1	59386199	59386450
chr1	59418679	59418893
chr1	59531277	59531400
chr1	59690865	59690973
chr1	59701225	59701327
chr1	59709945	59710102
chr1	59725508	59725618
chr1	59789583	59789813
chr1	59936167	59936588
chr1	59986991	59987164
chr1	59988595	59989003
chr1	60154207	60154380
chr1	60175639	60175892
chr1	60212783	60212977
chr1	60231196	60231299
chr10	188077	188236
chr10	236117	236351
chr10	239873	240191
chr10	241886	241986
chr10	294380	294532
chr10	319531	319688
chr10	338827	339133
chr10	511429	511572
chr10	513832	514014
chr10	551301	551450
chr10	563928	564027
chr10	960518	960799
chr10	1178743	1179233
chr10	1244587	1244760
chr10	1343319	1343501
chr10	1524565	1524701
chr10	1757074	1757293
chr10	1974809	1975020
chr10	2742591	2742751
chr10	2925941	2926125
chr10	3734491	3734572
chr10	3758901	3759048
chr10	4065799	4065885
chr10	4176360	4176516
chr10	4514539	4514749
chr10	4927408	4927530
chr10	5056873	5056978
chr10	5111844	5112122
chr10	5231802	5231882
chr10	5244732	5244894
chr10	5329192	5329304
chr10	5958587	5958792
chr10	6016428	6016619
chr10	6308129	6308268
chr10	6380558	6380751
chr10	6617783	6617843
chr10	6758534	6758630
chr10	6856136	6856294
chr10	6899491	6899611
chr10	7002988	7003179
chr10	7170482	7170605
chr10	7172000	7172273
chr10	7266734	7266820
chr10	7452332	7452399
chr10	7520495	7520709
chr10	7665940	7666199
chr10	7858961	7859139
chr10	8614404	8614531
chr10	8937045	8937237
chr10	9161249	9161482
chr10	9360949	9361200
chr10	9465677	9465824
chr10	9983974	9984149
chr10	10729448	10729732
chr10	11010137	11010263
chr10	11013616	11013812
chr10	11087396	11087759
chr10	11261392	11261456
chr10	11327506	11327567
chr10	11447971	11448167
chr10	11456899	11456972
chr10	11952588	11952669
chr10	12112179	12112273
chr10	12231272	12231395
chr10	12368131	12368396
chr10	12588680	12588803
chr10	12954300	12954449
chr10	12989911	12990123
chr10	13434139	13434264
chr10	13864613	13864690
chr10	14003042	14003148
chr10	14254003	14254119
chr10	14462962	14463059
chr10	14719034	14719355
chr10	14907507	14907707
chr10	15088394	15088500
chr10	15473250	15473618
chr10	15488807	15489050
chr10	15533668	15533851
chr10	15558807	15558911
chr10	15892522	15892758
chr10	15928014	15928173
chr10	16274117	16274260
chr10	16449440	16449569
chr10	16454549	16454866
chr10	16503571	16503725
chr10	16539780	16540004
chr10	16650273	16650384
chr10	17053125	17053292
chr10	17066803	17066935
chr10	17126703	17126848
chr10	17204270	17204403
chr10	17277415	17277632
chr10	17359434	17359593
chr10	17449623	17449777
chr10	17512013	17512092
chr10	17607539	17607741
chr10	17794151	17794235
chr10	17881164	17881503
chr10	18013426	18013637
chr10	18423167	18423376
chr10	19016304	19016412
chr10	19196962	19197198
chr10	19199042	19199321
chr10	19240993	19241230
chr10	19383279	19383412
chr10	19410096	19410262
chr10	19504439	19504515
chr10	19726644	19726858
chr10	20048080	20048176
chr10	20147620	20147861
chr10	20294137	20294272
chr10	20576166	20576337
chr10	21122634	21122805
chr10	21286637	21286891
chr10	21628953	21629063
chr10	21837872	21838011
chr10	21865765	21865859
chr10	22326841	22327065
chr10	22350520	22350744
chr10	22506723	22506870
chr10	22751060	22751345
chr10	22935014	22935105
chr10	23016543	23016772
chr10	23573281	23573400
chr10	23584119	23584297
chr10	23598998	23599241
chr10	23610688	23610945
chr10	23693484	23693552
chr10	23848264	23848529
chr10	24364601	24364839
chr10	24373176	24373297
chr10	24855403	24855519
chr10	24870919	24871102
chr10	24908839	24909099
chr10	25019609	25019901
chr10	25134456	25134536
chr10	25152632	25152776
chr10	25259674	25259812
chr10	25283834	25283959
chr10	25513236	25513423
chr10	25547388	25547530
chr10	25592861	25592917
chr10	25777091	25777239
chr10	25793633	25793759
chr10	25963209	25963286
chr10	26196176	26196354
chr10	26784642	26784808
chr10	26802052	26802175
chr10	26890217	26890468
chr10	26895963	26896137
chr10	26932870	26932973
chr10	27096553	27096761
chr10	27235251	27235396
chr10	27283894	27283997
chr10	27304731	27304855
chr10	27803202	27803338
chr10	27803424	27803663
chr10	28011016	28011193
chr10	28038649	28038906
chr10	28943411	28943588
chr10	29302041	29302411
chr10	29521843	29521919
chr10	29917831	29917945
chr10	29955519	29955732
chr10	29957513	29957732
chr10	30036773	30036919
chr10	30102101	30102366
chr10	30388025	30388179
chr10	30662274	30662397
chr10	31098951	31099069
chr10	31562565	31562690
chr10	31693756	31694056
chr10	32632756	32633034
chr10	32653415	32653625
chr10	32701163	32701346
chr10	32759607	32759681
chr10	33630624	33630887
chr10	33687231	33687406
chr10	33797500	33797666
chr10	33852765	33852875
chr10	33864478	33864702
chr10	33909554	33909666
chr10	33934524	33934769
chr10	33977055	33977310
chr10	34394482	34394666
chr10	34438850	34439060
chr10	34451257	34451421
chr10	35005120	35005464
chr10	35228980	35229126
chr10	35402913	35403073
chr10	35790000	35790143
chr10	35924805	35925054
chr10	35938773	35938974
chr10	36021604	36021908
chr10	36148924	36149157
chr10	36262256	36262398
chr10	36358128	36358339
chr10	36455073	36455262
chr10	36455787	36455963
chr10	36600898	36601026
chr10	37073639	37073939
chr10	37527610	37528236
chr10	37689737	37689837
chr10	37715979	37716116
chr10	38027034	38027223
chr10	38129062	38129291
chr10	38395724	38395980
chr10	38902688	38902821
chr10	39299983	39300181
chr10	39356693	39356785
chr10	39532024	39532083
chr10	39640367	39640539
chr10	39664394	39664523
chr10	39771702	39771816
chr10	39783666	39783814
chr10	39874252	39874674
chr10	39933466	39933685
chr10	39984333	39984466
chr10	40059522	40059599
chr10	40769171	40769322
chr10	41172019	41172374
chr10	42080018	42080099
chr10	42549065	42549301
chr10	42714540	42714700
chr10	43251755	43251834
chr10	43338460	43338533
chr10	43363230	43363408
chr10	43435369	43435554
chr10	43528211	43528446
chr10	43530079	43530273
chr10	43602115	43602393
chr10	44795909	44795995
chr10	44819267	44819489
chr10	45135915	45136155
chr10	45146545	45146749
chr10	45227562	45227684
chr10	45231755	45231964
chr10	45241821	45242117
chr10	45335541	45335691
chr10	45645462	45645647
chr10	45723390	45723718
chr10	45796915	45797063
chr10	46076945	46077728
chr10	46247038	46247184
chr10	46571981	46573767
chr11	32731	33010
chr11	164679	164911
chr11	165675	165864
chr11	167316	167569
chr11	230756	230886
chr11	240624	241106
chr11	364081	364359
chr11	394126	394535
chr11	659845	660088
chr11	661309	661461
chr11	897923	898060
chr11	898119	898350
chr11	1573550	1573694
chr11	1861967	1862232
chr11	2346568	2346693
chr11	2399693	2399905
chr11	2602998	2603185
chr11	2693836	2694158
chr11	2698311	2698594
chr11	3008357	3008444
chr11	3537912	3538089
chr11	4138936	4139200
chr11	4145428	4145648
chr11	4156664	4157144
chr11	4237592	4237898
chr11	5435228	5435401
chr11	5537233	5537420
chr11	5593487	5593580
chr11	5983357	5983460
chr11	6017409	6017489
chr11	6540750	6541035
chr11	6601149	6601264
chr11	6649980	6650315
chr11	7569347	7569644
chr11	8012312	8012424
chr11	8716125	8716264
chr11	8795304	8795459
chr11	9049661	9049830
chr11	9771409	9771632
chr11	9993345	9993470
chr11	10321330	10321492
chr11	10536320	10536469
chr11	10872926	10872993
chr11	10931918	10932083
chr11	10998303	10998527
chr11	11000684	11000816
chr11	11048157	11048350
chr11	11242431	11242636
chr11	11309995	11310247
chr11	11396834	11397076
chr11	11610668	11610759
chr11	11639946	11640058
chr11	11677809	11677992
chr11	11789491	11789574
chr11	12044400	12044735
chr11	13158179	13158321
chr11	13192886	13193008
chr11	13321129	13321258
chr11	13440098	13440192
chr11	13782740	13782962
chr11	13989776	13989889
chr11	14055905	14056105
chr11	14128733	14128969
chr11	14385720	14385856
chr11	14429525	14429598
chr11	14482150	14482243
chr11	14511222	14511391
chr11	14681234	14681452
chr11	14999072	14999273
chr11	15438994	15439244
chr11	15553509	15553628
chr11	15644328	15644490
chr11	15651373	15651444
chr11	15651524	15651635
chr11	15760930	15761467
chr11	15768405	15768643
chr11	15769004	15769180
chr11	15769970	15770218
chr11	15774319	15774684
chr11	15775184	15775807
chr11	15776882	15777283
chr11	15781696	15782138
chr11	16149242	16149427
chr11	16561431	16561655
chr11	16656180	16656395
chr11	16731058	16731222
chr11	16850211	16850318
chr11	16970739	16970990
chr11	17532689	17532830
chr11	17811415	17811565
chr11	18504206	18504272
chr11	18615607	18615801
chr11	18777287	18777542
chr11	18863740	18863914
chr11	19235428	19235530
chr11	19295358	19295637
chr11	19410900	19411016
chr11	19447877	19447984
chr11	20089781	20089953
chr11	20343138	20343395
chr11	20851286	20851472
chr11	20915638	20915724
chr11	21380957	21381174
chr11	21914413	21914633
chr11	21952976	21953165
chr11	21961097	21961350
chr11	22252675	22252917
chr11	22970808	22971084
chr11	22973475	22973728
chr11	24038118	24038286
chr11	24140821	24140970
chr11	24173246	24173475
chr11	24204292	24204414
chr11	24408406	24408569
chr11	24520414	24520568
chr11	24975023	24975121
chr11	24985157	24985282
chr11	25069426	25069595
chr11	25450762	25450932
chr11	25761196	25761396
chr11	25762457	25762596
chr11	25920752	25920939
chr11	26342500	26342594
chr11	26491763	26491943
chr11	26910592	26910792
chr11	26959656	26959777
chr11	27543301	27543491
chr11	27616290	27616388
chr11	27693907	27694120
chr11	28208037	28208154
chr11	28265603	28265776
chr11	28272386	28272567
chr11	28559345	28559575
chr11	28808826	28808899
chr11	29383904	29384169
chr11	29404180	29404359
chr11	29405231	29405391
chr11	29513036	29513307
chr11	30009649	30009878
chr11	30196608	30196759
chr11	30289903	30290110
chr11	30465582	30465698
chr11	30637199	30637319
chr11	30778358	30778715
chr11	30816277	30816523
chr11	30919744	30919853
chr11	31552730	31552944
chr11	31625039	31625209
chr11	31720897	31721024
chr11	31861700	31861810
chr11	31911121	31911280
chr11	31912623	31913036
chr11	32135997	32136428
chr11	32442642	32442793
chr11	32623561	32623646
chr11	32912986	32913189
chr11	33147497	33147602
chr11	33904823	33904937
chr11	35008597	35008794
chr11	35095550	35095725
chr11	35158532	35158692
chr11	35366545	35366764
chr11	35383482	35383800
chr11	35713306	35713568
chr11	35722701	35722838
chr11	35739124	35739352
chr11	36050009	36050120
chr11	36133299	36133491
chr11	36570525	36570708
chr11	36783948	36784175
chr11	37108708	37108887
chr11	37135841	37136073
chr11	37257723	37257919
chr11	37596839	37597019
chr11	37751875	37751983
chr11	37782429	37782556
chr11	37836481	37836681
chr11	38286004	38286196
chr11	38429058	38429292
chr11	38470845	38471227
chr11	38588387	38588532
chr11	39020092	39020233
chr11	39400695	39400823
chr11	39535033	39535156
chr11	39947197	39947308
chr11	40385126	40385375
chr11	40546206	40546397
chr11	40817853	40817956
chr11	40992865	40992992
chr11	41091611	41091724
chr11	41513200	41513407
chr11	41595752	41595864
chr11	41607199	41607388
chr11	41691235	41691513
chr11	41746795	41747021
chr11	41787357	41787548
chr11	41848575	41848815
chr11	42104964	42105265
chr11	42246898	42247078
chr11	42248938	42249287
chr11	42271101	42271317
chr11	42314375	42314540
chr11	42594921	42595117
chr11	42640873	42641106
chr11	43238784	43238936
chr11	43553553	43553761
chr11	43647246	43647427
chr11	43963140	43963277
chr11	43963403	43963564
chr11	44221487	44221703
chr11	44649151	44649330
chr11	44680288	44680599
chr11	45385972	45386045
chr11	45427734	45428083
chr11	45433462	45433722
chr11	45470300	45470434
chr11	45541204	45541273
chr11	45542890	45543113
chr11	45558890	45558969
chr11	45737014	45737154
chr11	45827877	45827976
chr11	46080037	46080207
chr11	46080350	46080498
chr11	46189388	46189592
chr11	46212124	46212205
chr11	46237895	46238210
chr11	46251874	46252337
chr12	27031	27225
chr12	47241	47336
chr12	192232	192796
chr12	193033	193266
chr12	252523	252624
chr12	355845	356162
chr12	401807	402032
chr12	475050	475178
chr12	514102	514235
chr12	590686	590921
chr12	657775	657882
chr12	737602	737786
chr12	800463	800542
chr12	840385	840584
chr12	1033682	1033977
chr12	1257460	1257741
chr12	1575935	1576117
chr12	1619958	1620077
chr12	1769275	1769583
chr12	2317331	2317607
chr12	2398916	2399015
chr12	2536140	2536286
chr12	2536791	2537011
chr12	2760749	2760901
chr12	3081619	3081782
chr12	3142502	3142568
chr12	3152856	3152954
chr12	3156001	3156179
chr12	3309354	3309516
chr12	3364125	3364311
chr12	3610961	3611195
chr12	3662250	3662394
chr12	3976442	3976744
chr12	5043965	5044064
chr12	5154152	5154291
chr12	5269606	5269789
chr12	5448387	5448526
chr12	5853939	5854102
chr12	5872087	5872292
chr12	5880369	5880513
chr12	5884112	5884307
chr12	5909686	5909807
chr12	6510548	6510733
chr12	6517810	6517982
chr12	6640689	6640764
chr12	6642016	6642136
chr12	6988534	6988673
chr12	7208265	7208482
chr12	7388159	7388276
chr12	7499592	7499724
chr12	7591190	7591303
chr12	7892323	7892495
chr12	7905413	7905546
chr12	7930697	7930849
chr12	8196132	8196330
chr12	8564962	8565125
chr12	8623895	8624183
chr12	8845462	8845582
chr12	9186110	9186295
chr12	9190811	9190933
chr12	9205328	9205443
chr12	9431779	9432031
chr12	9435352	9435407
chr12	9538525	9538688
chr12	9574345	9574505
chr12	9615022	9615196
chr12	10022636	10022769
chr12	10177659	10177855
chr12	10183552	10183690
chr12	10184953	10185061
chr12	11549477	11549668
chr12	11655253	11655348
chr12	12976901	12977010
chr12	13586670	13586930
chr12	13813697	13813861
chr12	14422544	14422710
chr12	14570734	14570882
chr12	14585489	14585599
chr12	14703633	14703719
chr12	14826380	14826504
chr12	15108354	15108466
chr12	15207938	15208092
chr12	15333079	15333290
chr12	15716055	15716229
chr12	15845607	15845717
chr12	15967794	15967980
chr12	15972590	15972707
chr12	16263328	16263486
chr12	16540881	16541093
chr12	16571452	16571520
chr12	16582391	16582639
chr12	16834344	16834528
chr12	16834590	16834686
chr12	16842243	16842390
chr12	16842808	16843040
chr12	16843164	16843292
chr12	16843852	16844510
chr12	16844672	16845008
chr12	16845384	16845525
chr12	16855957	16856119
chr12	16856800	16856995
chr12	16953753	16954023
chr12	16994243	16994433
chr12	17394763	17394990
chr12	17432464	17432659
chr12	17467157	17467325
chr12	17616936	17617037
chr12	18057863	18057960
chr12	18156140	18156338
chr12	18244786	18245007
chr12	18245564	18245717
chr12	18349958	18350101
chr12	18404556	18404804
chr12	18474592	18474770
chr12	18586633	18586777
chr12	18587887	18588080
chr12	18687563	18687697
chr12	18806411	18806684
chr12	18807868	18807957
chr12	18892725	18892819
chr12	19676661	19676768
chr12	19748975	19749143
chr12	20905769	20906039
chr12	20968806	20968933
chr12	21187755	21187929
chr12	21456366	21456613
chr12	21617838	21617912
chr12	21787668	21787812
chr12	21790656	21790752
chr12	21964390	21964463
chr12	22505012	22505123
chr12	23078156	23078258
chr12	23253926	23254122
chr12	23717176	23717365
chr12	23724911	23725034
chr12	23770587	23770655
chr12	24001013	24001234
chr12	24337373	24337481
chr12	24360377	24360738
chr12	24710000	24710077
chr12	24816155	24816325
chr12	25255283	25255506
chr12	25268066	25268290
chr12	25270138	25270269
chr12	25594417	25594502
chr12	25617922	25618103
chr12	25703667	25703826
chr12	25732002	25732083
chr12	26023100	26023223
chr12	26096307	26096535
chr12	26812052	26812133
chr12	26948643	26948827
chr12	27196244	27196742
chr12	27342439	27342648
chr12	27492678	27492864
chr12	27972125	27972543
chr12	28016600	28016744
chr12	28023891	28024074
chr12	28083429	28083561
chr12	28165130	28165327
chr12	28369488	28369699
chr12	28626811	28626891
chr12	28685621	28685855
chr12	28791573	28791722
chr12	28810127	28810215
chr12	29146461	29146670
chr12	29168604	29168795
chr12	29186682	29186770
chr12	29390764	29390947
chr12	30066732	30066810
chr12	30088375	30088480
chr12	30332209	30332539
chr12	30492202	30492302
chr12	30660399	30660680
chr12	30723283	30723544
chr12	30760543	30760661
chr12	30875485	30875546
chr12	31058573	31058734
chr12	31107818	31108040
chr12	31311346	31311435
chr12	31489908	31490063
chr12	31635233	31635468
chr12	31700046	31700250
chr12	31817214	31817386
chr12	31838336	31838618
chr12	31954342	31954591
chr12	31969005	31969153
chr12	32015089	32015282
chr12	32019328	32019635
chr12	32023242	32023394
chr12	32164725	32164832
chr12	32204036	32204138
chr12	32243542	32243623
chr12	32247701	32247852
chr12	32298696	32298812
chr12	32918526	32918702
chr12	32927520	32927638
chr12	32978079	32978245
chr12	32981982	32982228
chr12	33190724	33191008
chr12	33207773	33207974
chr12	33232407	33232484
chr12	33377422	33377651
chr12	33727178	33727302
chr12	33838231	33838369
chr12	33943172	33943299
chr12	34148512	34148645
chr12	34723147	34723276
chr12	34989633	34989798
chr12	35048501	35048582
chr12	35087643	35087742
chr12	35142783	35142881
chr12	35258742	35259063
chr12	35262773	35262993
chr12	35379414	35379562
chr12	36130665	36130811
chr12	37266260	37266453
chr12	37289786	37289976
chr12	37306482	37306772
chr12	37576105	37576187
chr12	37615513	37615673
chr12	37748880	37749052
chr12	37812530	37812731
chr12	37853631	37853779
chr12	38020020	38020178
chr12	38043066	38043286
chr12	38145944	38146076
chr12	38159303	38159586
chr12	38460199	38460389
chr12	38905676	38905974
chr12	38969799	38970067
chr12	38999528	38999699
chr12	39042401	39042535
chr12	39050605	39050764
chr12	39077158	39077302
chr12	39121349	39121466
chr12	39741268	39741475
chr12	40028047	40028264
chr12	40180084	40180577
chr12	40190757	40190907
chr12	40211125	40211348
chr12	40394617	40394751
chr12	40411021	40411106
chr12	40520729	40520860
chr12	40529624	40529788
chr12	40592354	40592599
chr12	40940214	40940337
chr12	40999121	40999320
chr12	41212086	41212337
chr12	41217646	41218148
chr12	41406402	41406491
chr12	41435900	41436094
chr12	41487374	41487490
chr12	41607757	41607905
chr12	42026484	42026792
chr12	42327888	42328145
chr12	42583228	42583457
chr12	42584193	42584415
chr12	42721352	42721605
chr12	43118321	43118506
chr12	43382519	43382716
chr12	43766424	43766602
chr12	43869476	43869719
chr12	44193760	44193923
chr12	44259459	44259565
chr12	44462199	44462285
chr12	45359488	45359646
chr12	45411222	45411455
chr12	45749139	45749326
chr12	45780094	45780207
chr12	45862587	45862661
chr12	45967095	45967420
chr12	46418960	46419323
chr12	46419344	46419502
chr12	46462314	46462462
chr12	47016913	47017176
chr12	47028173	47028306
chr12	47070867	47071044
chr12	47071179	47071301
chr12	47342309	47342482
chr12	47376299	47376538
chr12	47408423	47408555
chr12	48052788	48052859
chr12	48095024	48095528
chr12	48315918	48316201
chr12	48397752	48398062
chr12	48779465	48779636
chr12	48875800	48875935
chr12	48911212	48911499
chr12	48944694	48944885
chr12	48952877	48953103
chr12	48968698	48969120
chr12	49027759	49028309
chr12	49033754	49033853
chr12	49159659	49159830
chr12	49402823	49402909
chr12	49442316	49442419
chr12	49523577	49523921
chr12	49562117	49562485
chr12	49742235	49742429
chr12	49803102	49803520
chr12	49804845	49805208
chr12	50279168	50279326
chr12	50329808	50330052
chr12	50418725	50419095
chr12	50449372	50449656
chr12	50593236	50593329
chr12	50607893	50608075
chr13	38612	38690
chr13	181418	181526
chr13	197226	197489
chr13	225401	225632
chr13	288957	289101
chr13	456450	456705
chr13	523130	523330
chr13	1044759	1044983
chr13	1091769	1091975
chr13	1295842	1295998
chr13	1706131	1706378
chr13	1898548	1898944
chr13	1989178	1989262
chr13	2068703	2068907
chr13	2312051	2312238
chr13	2424687	2424777
chr13	2522229	2522349
chr13	2685985	2686091
chr13	2730729	2730926
chr13	2732515	2732802
chr13	2744815	2745025
chr13	3325673	3325826
chr13	4120651	4120787
chr13	4595277	4595438
chr13	4650448	4650594
chr13	4894106	4894300
chr13	5512185	5512315
chr13	5513295	5513426
chr13	5513602	5513857
chr13	5654533	5654653
chr13	6026799	6026939
chr13	6261298	6261385
chr13	6542770	6542957
chr13	6765756	6765892
chr13	6836616	6836870
chr13	6966299	6966485
chr13	6986773	6986916
chr13	7472071	7472208
chr13	7774554	7774809
chr13	8204108	8204287
chr13	9232993	9233087
chr13	9386163	9386416
chr13	9386709	9386871
chr13	9663221	9663481
chr13	9710279	9710480
chr13	10108123	10108346
chr13	10505765	10505891
chr13	10600178	10600478
chr13	10804950	10805057
chr13	10907780	10907873
chr13	11279723	11279890
chr13	11311135	11311241
chr13	11588282	11588526
chr13	11761556	11761696
chr13	12169183	12169506
chr13	12200832	12200939
chr13	12790028	12790117
chr13	13142048	13142342
chr13	13345575	13345949
chr13	13544762	13544901
chr13	13579029	13579160
chr13	13936245	13936348
chr13	14027431	14027521
chr13	15062562	15062711
chr13	15063340	15063474
chr13	15120460	15120713
chr13	15349003	15349264
chr13	15393856	15393924
chr13	15642504	15642686
chr13	15785093	15785315
chr13	15793442	15793536
chr13	15898930	15899135
chr13	15948132	15948276
chr13	16471309	16471457
chr13	17680000	17680253
chr13	17772546	17772792
chr13	17791282	17791402
chr13	17807181	17807332
chr13	17830549	17830703
chr13	17876652	17876838
chr13	17920871	17921092
chr13	17970128	17970542
chr13	18249665	18249744
chr13	18659007	18659083
chr13	18746849	18747010
chr13	18865458	18865602
chr13	19726740	19726881
chr13	19882661	19882935
chr13	19892820	19892924
chr13	19902141	19902355
chr13	20031144	20031366
chr13	20080555	20080711
chr13	20552451	20552615
chr13	20634441	20634555
chr13	20851721	20851853
chr13	21513763	21513936
chr13	21758711	21758935
chr13	21983455	21983612
chr13	22300838	22301072
chr13	22374764	22374924
chr13	22487879	22488094
chr13	22815873	22816157
chr13	22894749	22895173
chr13	22937977	22938098
chr13	22986244	22986468
chr13	23159517	23159665
chr13	23214514	23214587
chr13	23329037	23329279
chr13	23400604	23400709
chr13	23412756	23412956
chr13	23469632	23469836
chr13	24086156	24086324
chr13	24154154	24154247
chr13	24186791	24186947
chr13	24210698	24210881
chr13	24238062	24238219
chr13	24385762	24385871
chr13	24509672	24509763
chr13	24627496	24627679
chr13	24666023	24666232
chr13	24687005	24687133
chr13	24706200	24706477
chr13	24918909	24919164
chr13	25043359	25043555
chr13	25791901	25792040
chr13	26009590	26009950
chr13	26030249	26030422
chr13	26043624	26043856
chr13	26046684	26046821
chr13	26593808	26593997
chr13	26878047	26878188
chr13	27082114	27082202
chr13	27113063	27113241
chr13	27135963	27136178
chr13	27268367	27268652
chr13	27351324	27351497
chr13	27558707	27558841
chr13	27558926	27559111
chr13	27705492	27705622
chr13	27755409	27755536
chr13	27963437	27963609
chr13	28206748	28206939
chr13	28353816	28353925
chr13	28364300	28364409
chr13	28472199	28472422
chr13	28502449	28502740
chr13	28521595	28521732
chr13	28557623	28557792
chr13	29248237	29248480
chr13	30431103	30431365
chr13	31565145	31565279
chr13	31946618	31946837
chr13	31980651	31980779
chr13	32291564	32291647
chr13	32371234	32371411
chr13	32391368	32391510
chr13	32478844	32479014
chr13	32556978	32557271
chr13	32565991	32566116
chr13	32683801	32683994
chr13	32711522	32711683
chr13	32802723	32803009
chr13	32899589	32899841
chr13	33063175	33063393
chr13	33196685	33196844
chr13	33271007	33271163
chr13	33358174	33358332
chr13	33358475	33358616
chr13	33553068	33553170
chr13	33964667	33964873
chr13	34091240	34091463
chr13	35071948	35072159
chr13	35856654	35856802
chr13	36037498	36037654
chr13	36357834	36357974
chr13	36378540	36378774
chr13	36743949	36744305
chr13	36777471	36777597
chr13	36783417	36783609
chr13	36788035	36788513
chr13	36805303	36805691
chr13	37040943	37041107
chr13	37049228	37049456
chr13	37083213	37083378
chr13	37132058	37132230
chr13	37136068	37136159
chr13	37209496	37209608
chr13	37361794	37361925
chr13	37420384	37420498
chr13	37539218	37539401
chr13	37572453	37572639
chr13	37733670	37733833
chr13	37815806	37816107
chr13	37834089	37834283
chr13	37849649	37849862
chr13	37898417	37898500
chr13	38045637	38045741
chr13	38198069	38198192
chr13	38455356	38455460
chr13	38859778	38859970
chr13	38883228	38883418
chr13	39016863	39017017
chr13	39298674	39298745
chr13	39392310	39392416
chr13	39800518	39800708
chr13	39829986	39830168
chr13	39845409	39845542
chr13	39889396	39889624
chr13	39889938	39890048
chr13	39991855	39992012
chr13	40024501	40024718
chr13	40656970	40657106
chr13	40754990	40755230
chr13	40766041	40766389
chr13	40779658	40779869
chr13	40880638	40880731
chr13	41006828	41007057
chr13	41163532	41163675
chr13	41594695	41594912
chr13	41633555	41633749
chr13	41699590	41700025
chr13	41710946	41711038
chr13	41861060	41861260
chr13	42512045	42512196
chr13	42559449	42559587
chr13	42662852	42662959
chr13	42675932	42676091
chr13	42745136	42745368
chr13	42897891	42898190
chr13	43196814	43197066
chr13	43250491	43250657
chr13	43251834	43252069
chr13	43277604	43277712
chr13	43282228	43282315
chr13	43416438	43416672
chr13	43508000	43508205
chr13	43607751	43607890
chr13	43686928	43687079
chr13	44014133	44014256
chr13	44105545	44105819
chr13	44171996	44172132
chr13	44251654	44251955
chr13	44303312	44303434
chr13	44920606	44920765
chr13	44942287	44942386
chr13	45138322	45138452
chr13	45281921	45282087
chr13	45351316	45351442
chr13	45382249	45382490
chr13	45674101	45674208
chr13	45693247	45693312
chr13	45881372	45881534
chr13	45936493	45936611
chr13	46140300	46140424
chr13	46204175	46204274
chr13	46229201	46229571
chr13	46709123	46709292
chr13	46720415	46720677
chr13	47309162	47309302
chr13	47327918	47328002
chr13	47435869	47436033
chr13	47541446	47541560
chr13	47581238	47581362
chr13	47670862	47671306
chr13	47728206	47728476
chr13	47765048	47765372
chr13	47775977	47776143
chr13	47799561	47799835
chr13	48122685	48123111
chr13	48615314	48615604
chr13	48642242	48642373
chr13	48650927	48651218
chr13	48662864	48663070
chr13	48701796	48702636
chr13	48725211	48725311
chr13	48910612	48910743
chr13	49131150	49131263
chr13	49165275	49165522
chr13	49469157	49469357
chr13	49512534	49512749
chr13	49561555	49561786
chr13	49724549	49724746
chr13	50237145	50237379
chr13	50440279	50440462
chr13	50663054	50663136
chr13	50893397	50893496
chr13	50987314	50987378
chr13	51896770	51896949
chr13	52061277	52061424
chr13	52230279	52230358
chr13	52519211	52519363
chr13	53112750	53112873
chr13	53286922	53287024
chr13	53288587	53288793
chr13	53288900	53289093
chr13	53642768	53642993
chr13	53957845	53958326
chr13	53997009	53997353
chr14	110090	110202
chr14	122426	122519
chr14	124256	124594
chr14	149644	149861
chr14	309822	310144
chr14	460131	460540
chr14	512953	513052
chr14	746868	747073
chr14	747740	747913
chr14	789171	789313
chr14	816495	816712
chr14	819076	819308
chr14	1005490	1005670
chr14	1174822	1175049
chr14	1404380	1404488
chr14	1749867	1750295
chr14	1852684	1852808
chr14	2083800	2083966
chr14	2207108	2207408
chr14	2309006	2309205
chr14	2546422	2546536
chr14	2755220	2755328
chr14	3042892	3043018
chr14	3179608	3179779
chr14	3434316	3434621
chr14	3470506	3470702
chr14	4114934	4115064
chr14	4218358	4218637
chr14	4277376	4278176
chr14	4283115	4283356
chr14	4328067	4328184
chr14	4329785	4329901
chr14	4527560	4527838
chr14	4574540	4574799
chr14	4745839	4745981
chr14	4809636	4809776
chr14	4849317	4849419
chr14	4956545	4956715
chr14	5545026	5545290
chr14	6112309	6112476
chr14	6261896	6262093
chr14	6472832	6472947
chr14	6671033	6671245
chr14	6932630	6932757
chr14	6978337	6978430
chr14	7029528	7029781
chr14	7311560	7311725
chr14	7863498	7863663
chr14	7889793	7889913
chr14	8372317	8372568
chr14	8413096	8413257
chr14	8578901	8579097
chr14	8630824	8631098
chr14	8855872	8856273
chr14	8968928	8969184
chr14	10252595	10252707
chr14	10558093	10558216
chr14	10602522	10602759
chr14	10888475	10888612
chr14	11019000	11019115
chr14	11111912	11112085
chr14	11601311	11601491
chr14	11610009	11610303
chr14	11642524	11642970
chr14	11643803	11644012
chr14	11655942	11656147
chr14	11656700	11656868
chr14	12150092	12150279
chr14	12186499	12186636
chr14	12466906	12466982
chr14	12666634	12666807
chr14	12673400	12673578
chr14	13044807	13045055
chr14	13102508	13102653
chr14	13950215	13950390
chr14	14004438	14004847
chr14	14012750	14013018
chr14	14014755	14014951
chr14	14026928	14027024
chr14	14044734	14044959
chr14	14062229	14062413
chr14	14653738	14653874
chr14	14944293	14944413
chr14	14993668	14993799
chr14	15023783	15023924
chr14	15140831	15140994
chr14	15351430	15351674
chr14	15954607	15954743
chr14	16020013	16020252
chr14	16123978	16124265
chr14	16139711	16139862
chr14	16165065	16165191
chr14	16500000	16500159
chr14	16611450	16611742
chr14	17050476	17050560
chr14	17514063	17514147
chr14	17550097	17550264
chr14	17566910	17567155
chr14	17585642	17585889
chr14	17590670	17590939
chr14	17764581	17764714
chr14	17950652	17950782
chr14	18290900	18291099
chr14	18468236	18468463
chr14	18540168	18540272
chr14	18883351	18883532
chr14	19071653	19071863
chr14	19076381	19076556
chr14	19090212	19090314
chr14	19459181	19459316
chr14	19687150	19687323
chr14	19733159	19733296
chr14	19744036	19744208
chr14	20038513	20038737
chr14	20276504	20276659
chr14	20747824	20747965
chr14	20914412	20914624
chr14	21289209	21289448
chr14	21373777	21374066
chr14	21889039	21889133
chr14	21948029	21948184
chr14	21950059	21950464
chr14	22225798	22225973
chr14	22292477	22292601
chr14	23295944	23296031
chr14	23317453	23317568
chr14	23379110	23379273
chr14	24003220	24003322
chr14	24305659	24305802
chr14	24518565	24518746
chr14	24543086	24543175
chr14	24560359	24560452
chr14	24636617	24636757
chr14	24673881	24674021
chr14	24683276	24683382
chr14	24801697	24801809
chr14	24852574	24852755
chr14	25259359	25259488
chr14	25349487	25349578
chr14	25388545	25388712
chr14	25850131	25850330
chr14	25895590	25895773
chr14	25902070	25902197
chr14	25959679	25959922
chr14	25992851	25993010
chr14	26140336	26140507
chr14	26430147	26430249
chr14	26442710	26442921
chr14	26450740	26450910
chr14	26458790	26459070
chr14	26571845	26571985
chr14	26691747	26691867
chr14	26804031	26804165
chr14	26834747	26834852
chr14	27956994	27957141
chr14	28400408	28400605
chr14	28780443	28780523
chr14	28972479	28972704
chr14	29283095	29283207
chr14	30140355	30140568
chr14	30253119	30253437
chr14	30440663	30440918
chr14	30467604	30467809
chr14	30499726	30499890
chr14	30532118	30532432
chr14	30816868	30816998
chr14	31155168	31155352
chr14	31442758	31442865
chr14	31514003	31514124
chr14	32124364	32124522
chr14	32275105	32275247
chr14	32402898	32403087
chr14	32551975	32552078
chr14	32624679	32624893
chr14	32642815	32643137
chr14	33075519	33075677
chr14	33102143	33102336
chr14	33203326	33203608
chr14	33356814	33356989
chr14	33390039	33390161
chr14	33971284	33971430
chr14	34135329	34135503
chr14	34196669	34196762
chr14	34524583	34524717
chr14	34526604	34526697
chr14	34682950	34683329
chr14	34726023	34726303
chr14	34899605	34899728
chr14	34900976	34901167
chr14	34903565	34903689
chr14	34908239	34908430
chr14	35018221	35018360
chr14	35112609	35112751
chr14	35112873	35112989
chr14	35118495	35118605
chr14	35218035	35218325
chr14	35588185	35588405
chr14	36036420	36036648
chr14	36129766	36130077
chr14	36380134	36380270
chr14	36441985	36442110
chr14	36477931	36478043
chr14	36478572	36478677
chr14	36598958	36599136
chr14	36644850	36644945
chr14	36679766	36679968
chr14	36803965	36804074
chr14	36825520	36825666
chr14	36918633	36918758
chr14	37208083	37208372
chr14	37837337	37837472
chr14	37928677	37928865
chr14	37978348	37978465
chr14	37989239	37989374
chr14	38143785	38144048
chr14	38348166	38348303
chr14	38982783	38982950
chr14	39518699	39518872
chr14	39611815	39611975
chr14	39829487	39829798
chr14	40276764	40276865
chr14	40282572	40282900
chr14	40289410	40289811
chr14	40289933	40290141
chr14	40293513	40293746
chr14	40317002	40317140
chr14	40416775	40416866
chr14	40550663	40550793
chr14	40551156	40551330
chr14	40648049	40648265
chr14	40797041	40797165
chr14	40916887	40917012
chr14	41412546	41412897
chr14	42056901	42057211
chr14	42146596	42146701
chr14	42162399	42162547
chr14	42191195	42191271
chr14	42688331	42688405
chr14	42820807	42820918
chr14	42836239	42836381
chr14	42895673	42895962
chr14	43140323	43140591
chr14	43200642	43200738
chr14	43291835	43291987
chr14	43462264	43462414
chr14	43990035	43990150
chr14	44218657	44218871
chr14	44612163	44612394
chr14	44690383	44690653
chr14	45546460	45546752
chr14	45670536	45670711
chr14	45714720	45714818
chr14	45896154	45896265
chr14	45999820	45999912
chr14	46244479	46244663
chr14	46513910	46514027
chr14	47500563	47500667
chr14	47638846	47639236
chr14	47642786	47643039
chr14	47645813	47646152
chr14	47649759	47649951
chr14	47685941	47686101
chr14	48119739	48119893
chr14	48394010	48394105
chr14	48400319	48400509
chr14	48540134	48540257
chr14	49132793	49132991
chr14	49133307	49133418
chr14	49749917	49750046
chr14	49750484	49750875
chr14	50135719	50135794
chr14	50440525	50440674
chr14	50512389	50512682
chr14	50533417	50533511
chr14	50621404	50621565
chr14	51056163	51056340
chr14	51158828	51159491
chr14	51274710	51274857
chr14	51649100	51649338
chr14	51748508	51748789
chr14	52254389	52254598
chr14	52327419	52327546
chr14	52349245	52349404
chr14	52647551	52647784
chr14	52709637	52709830
chr14	52752883	52753130
chr14	53117499	53117802
chr14	53118949	53119126
chr14	53128077	53128305
chr14	53227139	53227419
chr14	53248073	53248383
chr14	53343886	53344529
chr14	53395405	53395644
chr14	53401975	53402079
chr14	53436226	53436906
chr14	53491999	53492168
chr14	53518444	53518718
chr14	53656260	53656507
chr14	53656540	53656676
chr15	32632	32746
chr15	60502	60629
chr15	77476	77849
chr15	317964	318385
chr15	361289	361624
chr15	513312	514027
chr15	1085851	1085980
chr15	1112991	1113112
chr15	1141985	1142271
chr15	1255955	1256048
chr15	1312328	1312590
chr15	1435432	1435607
chr15	1440183	1440460
chr15	1516409	1516548
chr15	1549642	1549807
chr15	1554976	1555122
chr15	1682157	1682612
chr15	1843318	1843514
chr15	1934338	1934415
chr15	2098006	2098133
chr15	2435486	2435650
chr15	2443906	2444102
chr15	2578088	2578201
chr15	2581273	2581450
chr15	2670098	2670188
chr15	2728641	2728811
chr15	2860118	2860269
chr15	2915860	2915976
chr15	3102280	3102388
chr15	3220920	3221051
chr15	3386757	3386908
chr15	3513583	3513917
chr15	3622221	3622329
chr15	3684779	3684874
chr15	3819302	3819427
chr15	3986677	3986820
chr15	4657193	4657402
chr15	4657444	4657649
chr15	4697844	4698096
chr15	4830397	4830556
chr15	4895060	4895438
chr15	4982199	4982342
chr15	5223969	5224267
chr15	5356390	5356515
chr15	5544251	5544378
chr15	5764813	5764917
chr15	6000172	6000364
chr15	6273550	6273667
chr15	6303437	6303606
chr15	6711614	6712101
chr15	6922633	6922719
chr15	7012263	7012375
chr15	7261582	7261857
chr15	8104825	8104995
chr15	8447334	8447529
chr15	8586545	8586640
chr15	8789665	8789841
chr15	8819064	8819346
chr15	8832204	8832406
chr15	8876665	8876882
chr15	9410481	9410663
chr15	9524289	9524558
chr15	9527625	9527858
chr15	9622457	9622669
chr15	9806045	9806164
chr15	9937544	9937655
chr15	9954326	9954406
chr15	10109864	10110032
chr15	10193801	10193883
chr15	10199142	10199223
chr15	10322575	10322667
chr15	10595494	10595551
chr15	10617334	10617464
chr15	11276003	11276292
chr15	11328556	11328727
chr15	11390426	11390602
chr15	12034621	12034764
chr15	12034978	12035110
chr15	12328183	12328272
chr15	12392578	12392713
chr15	12748853	12749079
chr15	13012334	13012481
chr15	13101693	13101821
chr15	13219668	13219833
chr15	13411657	13411769
chr15	13873622	13873745
chr15	13954376	13956524
chr15	13956531	13956801
chr15	13957611	13958292
chr15	13958471	13958581
chr15	13958869	13959062
chr15	13959821	13961819
chr15	14315070	14315276
chr15	14881866	14881958
chr15	15525654	15525869
chr15	15723253	15723581
chr15	15745992	15746084
chr15	15990914	15991046
chr15	15997347	15997473
chr15	15999148	15999315
chr15	16119312	16119769
chr15	16132998	16133208
chr15	16364571	16364861
chr15	16373287	16373465
chr15	16389111	16389345
chr15	16536343	16536576
chr15	16566334	16566522
chr15	16848208	16848345
chr15	17307361	17307527
chr15	17784287	17784498
chr15	18154443	18154542
chr15	18372571	18372898
chr15	18533997	18534121
chr15	19261998	19262258
chr15	19306891	19306994
chr15	19338581	19338688
chr15	19379525	19379613
chr15	19682843	19683046
chr15	19913206	19913373
chr15	19960493	19960561
chr15	21081545	21081709
chr15	21132711	21132894
chr15	21137793	21138033
chr15	21460245	21460609
chr15	21792472	21792827
chr15	22567392	22567702
chr15	22862818	22862993
chr15	23088897	23089063
chr15	23235060	23235305
chr15	23566420	23566596
chr15	24168738	24168875
chr15	24251450	24251704
chr15	24253236	24253455
chr15	24290381	24290511
chr15	24412035	24412132
chr15	24612928	24613112
chr15	24758406	24758524
chr15	24891022	24891165
chr15	24960068	24960268
chr15	24960666	24960818
chr15	24977671	24977816
chr15	25132303	25132626
chr15	25707968	25708148
chr15	26073310	26073394
chr15	26073589	26073966
chr15	26119500	26119673
chr15	26169961	26170038
chr15	26209668	26209949
chr15	27584428	27584562
chr15	27673962	27674218
chr15	27801156	27801392
chr15	27810768	27810892
chr15	27952077	27952183
chr15	28308863	28309123
chr15	28466600	28466887
chr15	28469888	28470016
chr15	29320050	29320161
chr15	29476910	29477052
chr15	29721712	29721784
chr15	29840882	29841085
chr15	29848442	29848672
chr15	29849460	29849671
chr15	30026169	30026446
chr15	30267673	30267773
chr15	30390919	30391090
chr15	30402250	30402335
chr15	30409736	30410086
chr15	30448256	30448491
chr15	30548757	30548855
chr15	31137500	31137641
chr15	31920580	31920725
chr15	32375843	32376115
chr15	32930389	32930569
chr15	33362890	33362985
chr15	33639872	33640021
chr15	33864854	33865066
chr15	33895089	33895261
chr15	33950995	33951091
chr15	33970628	33970852
chr15	33977625	33977738
chr15	33998036	33998165
chr15	33998567	33998674
chr15	33998922	33999285
chr15	33999938	34000114
chr15	34183259	34183478
chr15	34195990	34196161
chr15	34198654	34198867
chr15	34271646	34271714
chr15	34272081	34272331
chr15	34443411	34443618
chr15	34466478	34466634
chr15	34467238	34467376
chr15	34513695	34513917
chr15	34651262	34651413
chr15	34746627	34746894
chr15	35093034	35093154
chr15	35322751	35322966
chr15	35656434	35656917
chr15	35677431	35677525
chr15	35906684	35906765
chr15	36281283	36281392
chr15	36298655	36298786
chr15	36328878	36328985
chr15	36367234	36367355
chr15	36661874	36661949
chr15	36967146	36967256
chr15	36969332	36969563
chr15	37171654	37171867
chr15	37339522	37339814
chr15	37461179	37461366
chr15	37471186	37471365
chr15	37876831	37876968
chr15	37946411	37946634
chr15	38000579	38000874
chr15	38054239	38054426
chr15	38141256	38141350
chr15	38194715	38194920
chr15	38196650	38196828
chr15	38678809	38678888
chr15	38749618	38749716
chr15	38794860	38795016
chr15	39314176	39314381
chr15	39491989	39492285
chr15	39691674	39691749
chr15	40055588	40055786
chr15	40121013	40121129
chr15	40408480	40408668
chr15	40638324	40638547
chr15	40719793	40719952
chr15	40869577	40869926
chr15	41032671	41033208
chr15	41195228	41195479
chr15	41473771	41473844
chr15	41766798	41766957
chr15	42010216	42010571
chr15	42036091	42036278
chr15	42063061	42063225
chr15	42218750	42218832
chr15	42228101	42228400
chr15	42231018	42231142
chr15	42236837	42237247
chr15	42333167	42333355
chr15	43551383	43551863
chr15	43560137	43560428
chr15	43618750	43619018
chr15	43893597	43893786
chr15	44144365	44144603
chr15	44300280	44300617
chr15	44335616	44335847
chr15	44368770	44369054
chr15	44384818	44385025
chr15	44412836	44413038
chr15	44539056	44539372
chr15	44806579	44806742
chr15	44910976	44911304
[truncated: 5,952 more rows]

## Sheet: 1d
chr1	600725	601530
chr1	1031787	1032000
chr1	1470639	1471027
chr1	2797794	2798635
chr1	3288974	3289499
chr1	4105132	4105546
chr1	4127632	4128122
chr1	4142293	4142438
chr1	4165980	4166581
chr1	4176189	4176772
chr1	4176881	4177061
chr1	4177093	4177163
chr1	4187066	4187554
chr1	4194214	4194666
chr1	4225774	4226359
chr1	4357454	4357770
chr1	4796855	4797333
chr1	4816394	4816655
chr1	4838911	4839406
chr1	4872880	4873392
chr1	5323853	5324170
chr1	5329143	5329464
chr1	6404222	6404702
chr1	6404802	6404878
chr1	6417941	6418256
chr1	6440335	6440465
chr1	6754090	6754744
chr1	6773682	6774057
chr1	6779465	6779930
chr1	6815920	6816397
chr1	7807824	7808146
chr1	8360046	8360545
chr1	8499836	8500206
chr1	8559094	8559211
chr1	9283158	9283866
chr1	9505443	9505832
chr1	10677246	10677393
chr1	10677488	10677900
chr1	11003739	11004026
chr1	11013136	11013526
chr1	11317331	11317485
chr1	11598152	11598618
chr1	12155103	12155225
chr1	12155650	12156047
chr1	12158171	12158674
chr1	12158825	12159569
chr1	12173491	12173771
chr1	12180836	12181365
chr1	12184838	12185244
chr1	12187646	12188072
chr1	12241884	12242298
chr1	12960528	12960703
chr1	14057423	14057967
chr1	15280206	15280522
chr1	15916639	15916763
chr1	15978715	15978941
chr1	16041518	16041792
chr1	16053453	16053688
chr1	16116479	16116912
chr1	16118640	16118893
chr1	16118945	16119424
chr1	16124274	16124618
chr1	16126260	16126739
chr1	16371934	16372454
chr1	16389548	16389690
chr1	16392023	16392374
chr1	16508292	16508907
chr1	17577315	17577814
chr1	18398371	18398460
chr1	18410289	18410579
chr1	18413725	18414517
chr1	18415370	18416006
chr1	18693758	18694258
chr1	18839390	18839618
chr1	19060276	19060834
chr1	20532731	20533277
chr1	20597119	20597563
chr1	20597826	20598338
chr1	21442089	21442455
chr1	21905421	21905779
chr1	21926912	21927355
chr1	22564510	22565096
chr1	22570969	22571605
chr1	22608628	22609010
chr1	22613669	22613871
chr1	22618114	22618309
chr1	22750043	22750313
chr1	22794449	22794985
chr1	22836565	22836949
chr1	22837259	22837417
chr1	22837541	22838110
chr1	23675480	23676201
chr1	23709757	23710040
chr1	23716455	23716696
chr1	23747934	23748407
chr1	23982157	23982782
chr1	24291708	24291847
chr1	24294941	24295652
chr1	25230814	25231456
chr1	25251540	25251753
chr1	25847672	25847831
chr1	25847873	25848377
chr1	25881511	25882095
chr1	26059048	26059357
chr1	26140133	26141114
chr1	26169665	26169929
chr1	26450235	26450649
chr1	28609785	28610129
chr1	28779822	28780377
chr1	28784441	28784956
chr1	28801763	28802151
chr1	28816249	28816342
chr1	29714222	29714577
chr1	30679844	30680319
chr1	30684936	30685572
chr1	30693209	30694437
chr1	30700899	30701154
chr1	30715924	30716386
chr1	30759989	30760308
chr1	30958957	30959504
chr1	30984755	30985707
chr1	30998276	30998803
chr1	31005979	31006395
chr1	32927742	32928068
chr1	35339247	35339654
chr1	35340590	35340897
chr1	35372411	35372660
chr1	35405981	35406703
chr1	35515631	35516292
chr1	35517693	35518358
chr1	35535743	35535986
chr1	35639280	35639634
chr1	35647980	35648393
chr1	38581603	38581839
chr1	39276172	39276567
chr1	39277685	39278157
chr1	39828006	39828421
chr1	39855353	39855681
chr1	39878662	39879272
chr1	39898930	39899453
chr1	39911029	39911302
chr1	39915130	39916023
chr1	39931317	39931812
chr1	39940851	39941637
chr1	39975399	39975934
chr1	40306456	40307016
chr1	40790953	40791745
chr1	40808335	40809051
chr1	40852647	40853252
chr1	40910305	40910840
chr1	41215756	41216197
chr1	41295444	41295895
chr1	41891188	41891347
chr1	42561391	42561774
chr1	42840621	42840995
chr1	42841147	42841269
chr1	42946020	42946376
chr1	43098201	43098530
chr1	43160816	43161084
chr1	43161245	43161839
chr1	43161926	43162336
chr1	45179547	45179852
chr1	45457801	45457993
chr1	46076113	46076223
chr1	46102098	46102336
chr1	46186895	46187276
chr1	46196737	46197447
chr1	46203611	46203853
chr1	46205210	46205369
chr1	46580338	46580916
chr1	46605413	46605784
chr1	46609449	46609776
chr1	46614271	46614588
chr1	46659864	46660196
chr1	46666530	46666936
chr1	46667004	46667622
chr1	46669462	46669987
chr1	46708649	46709058
chr1	46766729	46766990
chr1	46772802	46773395
chr1	47001607	47001738
chr1	47041419	47041599
chr1	47237505	47237948
chr1	47282206	47282746
chr1	47310550	47310738
chr1	47718745	47719145
chr1	47722442	47723183
chr1	47725174	47725845
chr1	47725972	47726403
chr1	47963441	47963813
chr1	49825007	49825256
chr1	49841344	49841812
chr1	49843437	49843672
chr1	50296472	50296936
chr1	50326439	50326768
chr1	50343357	50343868
chr1	50352378	50353134
chr1	50353337	50353599
chr1	50376106	50376831
chr1	50403173	50403586
chr1	50717231	50717725
chr1	51244990	51245229
chr1	51300167	51300762
chr1	51401482	51401957
chr1	51667052	51667510
chr1	51668671	51669236
chr1	51692749	51693224
chr1	51698249	51698658
chr1	51975954	51976888
chr1	52012969	52013523
chr1	52369758	52370469
chr1	52779202	52779664
chr1	52779725	52779888
chr1	52869005	52869102
chr1	53224132	53224477
chr1	54558477	54559131
chr1	54561405	54561824
chr1	54566776	54567292
chr1	54578910	54579266
chr1	54579332	54580342
chr1	54581881	54582578
chr1	54593940	54594167
chr1	54594404	54594801
chr1	54725582	54725688
chr1	55751831	55752281
chr1	55814187	55814447
chr1	56721467	56721726
chr1	56960129	56960439
chr1	56981114	56981869
chr1	56982276	56982481
chr1	56982549	56982718
chr1	58721471	58722002
chr1	59236580	59236780
chr1	59676377	59677258
chr1	59722558	59723050
chr1	59781400	59781583
chr1	60023237	60023560
chr1	60120973	60121964
chr1	60319891	60320484
chr10	618202	618470
chr10	738328	738993
chr10	956689	957358
chr10	973638	973770
chr10	1081034	1081654
chr10	1143638	1144011
chr10	1146338	1146658
chr10	1154696	1155060
chr10	1157411	1157828
chr10	1162912	1163115
chr10	1535267	1535401
chr10	1778725	1779373
chr10	1836889	1837219
chr10	2495326	2495628
chr10	2496525	2496730
chr10	2500985	2501201
chr10	2504487	2504678
chr10	2504769	2504942
chr10	2504977	2505229
chr10	2708643	2709818
chr10	2821604	2822061
chr10	3794538	3795030
chr10	4123517	4124011
chr10	4128062	4129041
chr10	4132345	4132938
chr10	4160698	4161035
chr10	4189363	4189889
chr10	4205606	4205801
chr10	4644766	4644907
chr10	4648749	4649205
chr10	4681788	4682203
chr10	4836656	4837480
chr10	4878000	4878683
chr10	5332627	5332934
chr10	5949955	5950460
chr10	7070313	7070585
chr10	7856929	7857175
chr10	7861088	7861548
chr10	7936475	7936876
chr10	9312889	9313124
chr10	9568699	9569285
chr10	10175608	10175755
chr10	10175850	10176736
chr10	10182343	10182568
chr10	10185409	10186075
chr10	10284902	10285536
chr10	10296267	10296818
chr10	10299291	10299649
chr10	10305375	10305736
chr10	10315489	10316238
chr10	10803146	10803765
chr10	10820814	10821391
chr10	10831265	10831808
chr10	10842877	10842987
chr10	10843185	10843676
chr10	10860541	10861068
chr10	10862682	10863580
chr10	10868506	10869770
chr10	10888674	10889157
chr10	10922665	10923455
chr10	10981536	10981989
chr10	11396983	11397267
chr10	11485928	11486074
chr10	11549242	11549408
chr10	12048302	12048728
chr10	12431646	12432128
chr10	13016264	13016362
chr10	13028200	13028307
chr10	13163006	13163256
chr10	13474362	13474490
chr10	13508477	13509057
chr10	13511794	13512323
chr10	13518018	13518709
chr10	13518945	13520213
chr10	13521218	13521470
chr10	13584756	13584948
chr10	13734305	13734846
chr10	13735731	13736262
chr10	14840007	14840340
chr10	14968545	14968636
chr10	15067993	15068143
chr10	17396167	17396437
chr10	17480082	17480406
chr10	17483568	17483780
chr10	19064186	19064394
chr10	19067117	19067797
chr10	19073456	19073879
chr10	20263067	20263327
chr10	21278479	21278812
chr10	22020849	22021154
chr10	22064198	22064595
chr10	22233963	22234458
chr10	22268227	22268659
chr10	22269396	22269626
chr10	22740010	22740655
chr10	22823099	22823625
chr10	22923977	22924407
chr10	23495130	23495550
chr10	24293713	24293958
chr10	24956050	24956266
chr10	26281260	26281834
chr10	26285292	26285845
chr10	26293847	26294261
chr10	26745684	26746261
chr10	26964841	26965428
chr10	27023230	27023536
chr10	27762355	27762880
chr10	27766099	27766634
chr10	27791719	27792469
chr10	27792792	27793107
chr10	27839671	27840172
chr10	27856099	27856657
chr10	27862507	27862924
chr10	27919210	27919844
chr10	27928222	27929137
chr10	28071409	28071825
chr10	28150044	28150304
chr10	28155393	28155695
chr10	28218229	28218361
chr10	28560629	28561166
chr10	28817869	28818044
chr10	28883954	28884902
chr10	28925409	28925652
chr10	29565030	29565604
chr10	29622525	29622705
chr10	30053890	30054104
chr10	30734556	30735140
chr10	30742708	30743185
chr10	30792225	30792309
chr10	30792368	30792553
chr10	32168745	32169050
chr10	32183833	32184174
chr10	32251051	32251464
chr10	32256901	32257100
chr10	32259054	32259507
chr10	32294396	32294794
chr10	32302131	32302385
chr10	32346486	32346765
chr10	32419775	32420339
chr10	32427788	32428092
chr10	32430793	32430989
chr10	32450092	32450473
chr10	32481511	32481771
chr10	32481915	32482226
chr10	32482488	32482721
chr10	32494363	32494817
chr10	32518288	32518633
chr10	32536392	32537198
chr10	33038887	33039385
chr10	33090275	33091099
chr10	33135010	33135369
chr10	33146557	33146751
chr10	33262809	33263325
chr10	33277569	33277780
chr10	33363750	33364204
chr10	34016770	34017143
chr10	34123934	34124317
chr10	34126304	34126711
chr10	34647420	34648008
chr10	34650318	34650668
chr10	36560495	36560800
chr10	37069115	37069487
chr10	37580619	37581061
chr10	37644594	37645036
chr10	37842473	37842937
chr10	38378498	38378657
chr10	38443878	38444254
chr10	38544908	38545280
chr10	38944848	38945164
chr10	39046201	39046542
chr10	39077145	39077863
chr10	39089105	39089383
chr10	39472723	39473098
chr10	39493493	39493636
chr10	39498411	39498928
chr10	39505367	39505727
chr10	39589536	39589684
chr10	39705171	39705577
chr10	39709954	39710276
chr10	39733431	39733790
chr10	39748159	39748873
chr10	39751108	39751741
chr10	42270939	42271295
chr10	43226532	43226713
chr10	43526555	43526687
chr10	43618864	43619613
chr10	43620791	43621004
chr10	43621142	43621466
chr10	43637699	43638320
chr10	43639917	43640392
chr10	43717952	43718510
chr10	43954437	43954876
chr10	43957880	43958374
chr10	43963966	43964362
chr10	43989654	43989939
chr10	43990223	43990671
chr10	43991026	43991204
chr10	43993836	43994272
chr10	44394207	44394903
chr10	44395246	44395491
chr10	44822369	44822462
chr10	44933848	44934095
chr10	45170216	45170388
chr10	45188383	45188559
chr10	45381652	45382100
chr10	45386774	45387681
chr10	45496012	45496639
chr10	45496726	45497220
chr10	46086810	46087299
chr10	46118299	46118755
chr10	46121616	46122249
chr10	46550876	46551014
chr11	957122	957337
chr11	2040391	2040587
chr11	2139877	2140062
chr11	2149132	2149303
chr11	2151354	2151636
chr11	2151895	2152049
chr11	2162318	2162681
chr11	2277968	2278338
chr11	2278458	2278650
chr11	2828110	2828598
chr11	2849131	2849276
chr11	2849331	2849653
chr11	2860469	2860957
chr11	3381671	3382116
chr11	3820600	3821019
chr11	3821050	3821364
chr11	4279210	4279560
chr11	4323747	4324186
chr11	5510729	5511258
chr11	6136216	6136416
chr11	6136576	6137179
chr11	6141177	6141409
chr11	6679241	6679657
chr11	7674568	7674671
chr11	7675030	7675277
chr11	7675731	7676004
chr11	7679201	7679365
chr11	7717785	7718337
chr11	7734038	7734496
chr11	7849592	7850111
chr11	8535388	8535956
chr11	8551897	8552172
chr11	8630763	8631011
chr11	8640164	8640822
chr11	9518807	9519358
chr11	9602421	9602851
chr11	10678885	10679181
chr11	10925623	10925828
chr11	10962181	10962619
chr11	11774937	11775301
chr11	13827548	13827918
chr11	14023318	14023448
chr11	14591993	14592135
chr11	14697596	14697914
chr11	14698091	14698230
chr11	14716527	14716723
chr11	14766022	14766380
chr11	14791776	14792148
chr11	14792211	14792454
chr11	14811386	14811638
chr11	15976535	15976895
chr11	15981793	15982161
chr11	16285303	16285563
chr11	16316588	16316875
chr11	16666784	16667165
chr11	16695598	16695778
chr11	16696139	16696227
chr11	16739656	16740605
chr11	16809202	16809962
chr11	16817974	16818271
chr11	16955979	16956228
chr11	17006664	17007245
chr11	18064539	18068994
chr11	18233856	18234228
chr11	18800981	18801397
chr11	19021873	19022407
chr11	19029576	19029919
chr11	19059559	19059682
chr11	19127843	19128379
chr11	19132176	19132926
chr11	19134756	19135201
chr11	19142956	19143773
chr11	19156110	19156460
chr11	19169766	19170352
chr11	19337466	19337846
chr11	19400043	19401064
chr11	19401991	19402211
chr11	19405951	19406549
chr11	19699499	19699769
chr11	19706461	19706677
chr11	19774302	19774502
chr11	20234796	20235136
chr11	20440136	20440521
chr11	20451259	20451622
chr11	20476101	20476463
chr11	20481887	20482359
chr11	20483759	20484038
chr11	22069127	22069424
chr11	22380979	22381323
chr11	22403545	22404023
chr11	22439442	22439821
chr11	22449763	22450215
chr11	22482725	22482804
chr11	22488020	22488462
chr11	22492859	22493251
chr11	22493547	22493826
chr11	22673157	22673365
chr11	22721357	22721709
chr11	22792497	22793175
chr11	22802977	22803453
chr11	22805284	22806037
chr11	22807268	22807601
chr11	22808000	22808529
chr11	22822589	22822891
chr11	22837699	22837785
chr11	22882262	22882529
chr11	22915670	22916122
chr11	22993379	22993915
chr11	23178741	23179250
chr11	23314267	23314424
chr11	23330930	23331266
chr11	24151364	24151752
chr11	24402786	24403111
chr11	24413960	24414102
chr11	24474015	24474401
chr11	24574146	24574572
chr11	24599008	24599426
chr11	24616443	24617162
chr11	24653854	24654130
chr11	24664644	24665140
chr11	24671488	24671795
chr11	24675215	24675652
chr11	24747636	24747814
chr11	24873834	24874167
chr11	24948461	24948830
chr11	25036762	25036900
chr11	25651354	25651793
chr11	25873718	25873985
chr11	25878986	25879397
chr11	25883547	25883814
chr11	25935519	25935938
chr11	25936002	25936746
chr11	25945459	25945671
chr11	26156805	26157072
chr11	26164909	26165402
chr11	26186288	26186555
chr11	26527790	26528132
chr11	26743573	26743984
chr11	26756629	26757396
chr11	26899045	26899254
chr11	26973513	26973735
chr11	26974198	26974903
chr11	26977387	26977622
chr11	27587489	27587788
chr11	27590832	27591057
chr11	27751656	27751773
chr11	27771187	27771371
chr11	28361967	28362333
chr11	28551663	28551830
chr11	28753404	28753968
chr11	28787940	28788290
chr11	29116183	29116520
chr11	29116665	29116952
chr11	29134601	29135387
chr11	29146387	29147353
chr11	29193069	29193328
chr11	29216471	29216827
chr11	29220752	29221187
chr11	29228284	29228806
chr11	29259733	29260031
chr11	29432900	29433044
chr11	29439618	29439976
chr11	29452052	29452735
chr11	29488821	29489741
chr11	30224028	30224397
chr11	30439758	30440519
chr11	30699245	30699418
chr11	30880565	30880806
chr11	30908638	30909085
chr11	30998791	30999073
chr11	31003666	31003962
chr11	31031204	31031791
chr11	32152072	32152667
chr11	32152726	32153006
chr11	32171778	32171875
chr11	32174248	32174631
chr11	32179423	32179615
chr11	32179688	32179787
chr11	32179852	32180269
chr11	32181928	32182133
chr11	32182555	32183206
chr11	32183382	32183629
chr11	32288850	32289010
chr11	33234362	33234882
chr11	34235978	34236292
chr11	34431204	34431742
chr11	35627690	35628092
chr11	35715737	35715953
chr11	35852873	35853438
chr11	35942348	35942498
chr11	36380729	36380943
chr11	36453894	36454350
chr11	36559347	36559819
chr11	37160462	37161011
chr11	37320734	37321031
chr11	37327107	37327382
chr11	38630890	38630968
chr11	38902791	38903093
chr11	38913102	38913770
chr11	38928796	38930002
chr11	38935855	38936514
chr11	38938501	38939005
chr11	38950354	38950710
chr11	38966985	38967708
chr11	39354470	39354943
chr11	39905790	39906076
chr11	40436405	40436835
chr11	40452310	40452674
chr11	40461629	40462064
chr11	40462243	40462604
chr11	40477295	40477782
chr11	40696772	40696948
chr11	41194911	41195013
chr11	42159207	42159564
chr11	42168785	42169147
chr11	42482605	42483500
chr11	42511615	42511936
chr11	42921239	42921613
chr11	43042411	43042626
chr11	43077119	43077630
chr11	43079319	43079667
chr11	43081411	43081761
chr11	43083215	43083580
chr11	43086096	43086532
chr11	43087930	43088467
chr11	43089513	43090035
chr11	43093785	43094332
chr11	43103468	43103751
chr11	43111532	43111945
chr11	43131345	43131610
chr11	43132087	43132511
chr11	43137745	43138114
chr11	43138224	43138531
chr11	43141010	43141361
chr11	43142792	43143734
chr11	43144831	43145034
chr11	43145304	43145427
chr11	43145978	43146319
chr11	43148685	43148895
chr11	43149018	43149130
chr11	43149448	43149856
chr11	43151215	43152059
chr11	43152514	43152755
chr11	43155025	43155311
chr11	43160514	43160683
chr11	43163814	43164142
chr11	43164934	43165445
chr11	43165487	43165680
chr11	43174559	43174868
chr11	43175002	43176077
chr11	43712756	43713014
chr11	43723739	43723992
chr11	43771459	43771695
chr11	44209485	44209762
chr11	44276068	44276487
chr11	44290804	44291552
chr11	44793234	44793650
chr11	44904268	44904744
chr11	44911361	44911447
chr11	44911560	44912147
chr11	45616532	45617003
chr11	45787128	45787495
chr11	46511034	46511215
chr12	1073903	1074273
chr12	1764493	1765048
chr12	2052934	2053314
chr12	2205138	2205419
chr12	2256536	2257024
chr12	3547444	3547532
chr12	3547977	3548189
chr12	3728792	3728978
chr12	5347399	5348295
chr12	5560843	5560948
chr12	6093571	6093864
chr12	6097070	6097411
chr12	6108635	6108759
chr12	6135529	6135920
chr12	6471985	6472496
chr12	7079421	7079702
chr12	7166591	7166770
chr12	8365578	8365985
chr12	8922041	8922269
chr12	8945996	8946415
chr12	8947967	8948342
chr12	9281556	9281983
chr12	9288511	9289053
chr12	9477873	9478640
chr12	9596239	9596505
chr12	9669229	9669614
chr12	9712456	9712859
chr12	9790564	9791046
chr12	9798843	9799165
chr12	10118551	10118760
chr12	11620533	11620750
chr12	11889208	11889519
chr12	11976186	11976368
chr12	12158931	12159342
chr12	12173901	12174256
chr12	15440493	15440548
chr12	15466463	15466538
chr12	16604444	16604867
chr12	16624432	16624986
chr12	17086001	17086230
chr12	18411569	18412071
chr12	19663948	19664681
chr12	20870413	20870744
chr12	21482039	21482404
chr12	21574783	21575105
chr12	23046752	23047018
chr12	23047230	23047590
chr12	23312587	23312952
chr12	23576488	23576738
chr12	23610597	23611926
chr12	23612202	23612588
chr12	23613760	23613996
chr12	23614054	23614483
chr12	23622645	23623166
chr12	23647661	23648446
chr12	24172313	24172551
chr12	24172866	24173134
chr12	24860249	24860484
chr12	24943657	24943826
chr12	25021873	25022133
chr12	26334832	26335347
chr12	26476659	26477356
chr12	26477409	26477607
chr12	26938801	26939535
chr12	27024300	27024955
chr12	27034108	27034498
chr12	27092711	27092915
chr12	27093076	27093625
chr12	27095850	27096567
chr12	27113373	27114335
chr12	27128132	27128534
chr12	27547467	27547561
chr12	27985943	27986229
chr12	28193811	28194016
chr12	28245167	28245586
chr12	28393911	28394251
chr12	28411535	28412214
chr12	28414800	28415303
chr12	28436764	28437238
chr12	28437885	28438000
chr12	28453542	28453712
chr12	28476270	28476400
chr12	28567912	28568508
chr12	28691590	28691681
chr12	28692239	28692494
chr12	28694539	28694796
chr12	28697957	28698176
chr12	28722915	28723605
chr12	28731041	28731406
chr12	28733603	28734011
chr12	29037024	29037259
chr12	29075050	29075595
chr12	29106083	29106751
chr12	29116879	29117608
chr12	29990253	29990760
chr12	30118594	30118716
chr12	30387712	30387915
chr12	30740098	30740340
chr12	30824570	30824713
chr12	30978953	30979451
chr12	31799438	31799995
chr12	32691448	32691618
chr12	32692116	32692294
chr12	32692434	32692844
chr12	32693045	32693575
chr12	32699985	32700250
chr12	32735358	32735536
chr12	32747974	32748614
chr12	32749716	32750194
chr12	32760778	32761703
chr12	32762617	32763221
chr12	32782414	32782590
chr12	32782659	32782955
chr12	32785830	32786029
chr12	32889116	32889399
chr12	33041095	33041350
chr12	33087912	33088136
chr12	33359890	33360099
chr12	33374989	33375329
chr12	33690593	33690715
chr12	33849644	33849980
chr12	34983597	34983792
chr12	35211470	35211850
chr12	35488032	35488380
chr12	35831001	35831343
chr12	35831375	35831712
chr12	35839624	35839942
chr12	36280569	36281239
chr12	36281308	36281603
chr12	36334945	36335346
chr12	36337331	36337710
chr12	36376419	36376776
chr12	36559983	36561159
chr12	36563635	36564161
chr12	36588939	36589143
chr12	36592036	36592394
chr12	36594027	36594508
chr12	36604116	36605219
chr12	36613252	36613648
chr12	36705652	36705923
chr12	36734416	36735110
chr12	36817363	36817688
chr12	37120917	37121467
chr12	37541110	37541520
chr12	37772326	37772729
chr12	37780514	37781108
chr12	37820292	37820733
chr12	37827492	37827718
chr12	37873673	37873851
chr12	37876878	37877190
chr12	37885221	37885786
chr12	38211714	38212070
chr12	38240681	38240857
chr12	38240906	38241033
chr12	38282098	38282514
chr12	38336613	38336982
chr12	38354998	38355264
chr12	38419101	38419487
chr12	38514556	38514954
chr12	38520268	38520655
chr12	38533933	38534406
chr12	38579655	38580163
chr12	38608328	38608559
chr12	38639112	38639520
chr12	38705483	38705767
chr12	38707946	38708271
chr12	38771323	38772022
chr12	38779447	38779976
chr12	38951063	38951371
chr12	38951499	38951802
chr12	40132571	40132846
chr12	40140182	40140495
chr12	40153001	40153397
chr12	41194376	41194551
chr12	44173108	44173468
chr12	44184733	44185399
chr12	44250623	44251003
chr12	44272478	44272961
chr12	44285141	44285538
chr12	45394684	45394830
chr12	45465171	45465711
chr12	46667032	46667964
chr12	46689610	46689842
chr12	46697877	46698544
chr12	46932144	46932523
chr12	46940053	46940352
chr12	47697084	47697360
chr12	49391283	49392125
chr12	49633060	49633926
chr13	475779	476614
chr13	509732	510638
chr13	513841	514224
chr13	514658	514805
chr13	1128551	1129179
chr13	1179782	1179996
chr13	1180062	1180476
chr13	1184874	1185380
chr13	1194765	1195174
chr13	1195324	1195798
chr13	1204426	1204930
chr13	1254209	1254585
chr13	1475020	1475253
chr13	1738475	1739098
chr13	1741489	1741635
chr13	1920648	1920900
chr13	2676413	2676669
chr13	2767084	2767442
chr13	2780721	2781129
chr13	2819153	2819621
chr13	2854737	2855197
chr13	3231085	3231762
chr13	3299981	3300377
chr13	3308729	3309041
chr13	3311877	3312623
chr13	3442886	3443444
chr13	3457262	3457660
chr13	3457698	3457946
chr13	3478383	3478716
chr13	3522590	3523008
chr13	3551459	3551860
chr13	4047814	4048278
chr13	4956100	4956405
chr13	5033477	5034382
chr13	5103801	5104115
chr13	5107692	5108040
chr13	5129504	5130188
chr13	5144129	5144325
chr13	5150091	5150372
chr13	5172873	5172969
chr13	5174620	5175244
chr13	5175649	5176382
chr13	5187283	5187416
chr13	5200017	5200707
chr13	5200940	5201257
chr13	5212788	5213250
chr13	5247948	5248199
chr13	5304860	5305159
chr13	5420115	5420422
chr13	5436625	5436938
chr13	5438711	5438815
chr13	5438893	5439593
chr13	5449695	5450042
chr13	5450127	5450337
chr13	5526976	5527462
chr13	5557676	5558192
chr13	5607715	5608123
chr13	5718458	5718980
chr13	5725789	5726234
chr13	5739078	5739395
chr13	5757046	5757513
chr13	5758694	5759704
chr13	5760256	5760517
chr13	5760582	5760710
chr13	5760823	5760926
chr13	5761006	5762181
chr13	6393835	6393987
chr13	6419315	6419669
chr13	6453478	6453671
chr13	6605345	6605658
chr13	7282873	7283294
chr13	7304283	7304768
chr13	7309353	7309909
chr13	8012690	8012859
chr13	9350671	9350915
chr13	9587638	9587821
chr13	9729824	9729953
chr13	9829816	9830258
chr13	9876782	9877124
chr13	9877210	9877845
chr13	10002824	10003474
chr13	10031916	10032987
chr13	10165934	10166274
chr13	10166620	10167119
chr13	10175924	10176529
chr13	10578083	10578479
chr13	10578569	10578687
chr13	10585933	10586152
chr13	11152893	11154087
chr13	11154456	11154998
chr13	11164278	11164735
chr13	11167465	11168138
chr13	11193614	11194428
chr13	12933771	12934315
chr13	13111059	13111944
chr13	13111970	13112438
chr13	13137783	13138299
chr13	13187601	13188168
chr13	13283192	13283925
chr13	13364930	13365832
chr13	13411530	13412117
chr13	13514424	13514642
chr13	13561387	13561610
chr13	13824872	13825308
chr13	14787044	14787703
chr13	14799622	14800120
chr13	14834439	14834587
chr13	14836638	14837115
chr13	14840043	14840272
chr13	14843687	14843941
chr13	14847897	14848566
chr13	15446568	15446687
chr13	16681734	16681843
chr13	16685808	16686158
chr13	17039845	17040713
chr13	17058397	17058657
chr13	17062021	17062133
chr13	17088490	17088771
chr13	17137117	17137525
chr13	17141874	17142645
chr13	17166241	17166898
chr13	17203913	17204803
chr13	17206613	17206920
chr13	17231484	17231756
chr13	17238629	17238896
chr13	17270140	17271232
chr13	17317402	17317898
chr13	17323284	17323712
chr13	17323754	17323981
chr13	17325979	17326157
chr13	17326550	17326691
chr13	17343765	17343907
chr13	17344057	17344638
chr13	17400056	17400365
chr13	17407763	17408003
chr13	17410412	17410736
chr13	17417948	17418227
chr13	17436029	17436376
chr13	17446323	17446769
chr13	17453826	17454381
chr13	17463085	17463532
chr13	17497780	17498051
chr13	17580281	17580446
chr13	17603134	17603473
chr13	17666891	17667236
chr13	18299389	18299745
chr13	18300627	18301034
chr13	18309884	18310461
chr13	18491024	18491389
chr13	18491452	18491912
chr13	18544721	18544861
chr13	18883423	18883682
chr13	18883836	18884483
chr13	18894101	18894628
chr13	19226097	19226192
chr13	19370534	19370649
chr13	19372584	19373194
chr13	19373532	19373998
chr13	19516098	19516274
chr13	19899114	19899474
chr13	20638666	20639047
chr13	20639569	20639977
chr13	21048465	21048654
chr13	21904502	21904669
chr13	22028966	22029291
chr13	22052045	22052321
chr13	22085387	22085970
chr13	22152536	22153230
chr13	22158509	22158953
chr13	22185094	22185263
chr13	22197132	22197223
chr13	22198126	22198390
chr13	22198786	22199031
chr13	22431978	22432224
chr13	22443914	22444195
chr13	22444291	22444376
chr13	22630361	22630583
chr13	22962110	22962216
chr13	23099367	23099602
chr13	23419621	23420360
chr13	23879720	23880852
chr13	24698643	24699243
chr13	24806924	24807315
chr13	24842741	24843508
chr13	24846664	24846806
chr13	24869427	24869635
chr13	24874140	24875280
chr13	24875731	24876467
chr13	25125600	25126143
chr13	25186055	25186654
chr13	25212448	25212535
chr13	25316415	25316928
chr13	25653847	25654101
chr13	26111403	26112062
chr13	26138299	26138811
chr13	26175783	26176552
chr13	26259214	26259632
chr13	26377075	26377549
chr13	26438967	26439407
chr13	26495357	26495768
chr13	26586420	26586654
chr13	26923039	26923384
chr13	27498800	27499184
chr13	28015092	28015616
chr13	28675431	28675611
chr13	28691336	28691613
chr13	28729284	28729729
chr13	28729946	28730184
chr13	28733768	28734200
chr13	28755496	28755730
chr13	28755787	28755955
chr13	28758755	28759130
chr13	28762686	28762960
chr13	28763051	28763404
chr13	28765234	28765900
chr13	28797524	28798384
chr13	29045572	29045948
chr13	29077447	29078748
chr13	29351586	29351876
chr13	29355181	29355871
chr13	29360919	29361367
chr13	29401368	29401572
chr13	29401582	29401824
chr13	29869518	29870238
chr13	29939352	29940085
chr13	29994277	29994951
chr13	30211136	30211443
chr13	30211603	30211821
chr13	30225703	30226352
chr13	30536276	30536976
chr13	30710993	30711739
chr13	30729823	30730781
chr13	31035398	31035761
chr13	31049991	31050621
chr13	31365685	31365833
chr13	31481375	31481541
chr13	31496830	31497073
chr13	31530531	31530792
chr13	31552609	31553406
chr13	31555891	31556272
chr13	32913623	32913889
chr13	33510389	33510691
chr13	33615690	33616070
chr13	33638888	33639194
chr13	33639297	33639623
chr13	33658261	33658556
chr13	33972101	33972770
chr13	33974280	33974771
chr13	33983057	33983249
chr13	33991610	33992048
chr13	34022928	34023254
chr13	34038069	34038379
chr13	34048695	34049064
chr13	34049239	34049501
chr13	34049583	34049809
chr13	34051419	34051928
chr13	34053311	34054016
chr13	34058571	34058851
chr13	34068379	34068726
chr13	34079025	34080080
chr13	34117848	34118153
chr13	34118169	34118326
chr13	34145968	34146605
chr13	34171358	34171645
chr13	34262189	34262579
chr13	34273546	34273756
chr13	34319420	34319910
chr13	34348096	34348441
chr13	34598808	34599153
chr13	35008228	35008504
chr13	35031482	35031554
chr13	35563977	35564296
chr13	35681406	35681596
chr13	35681637	35681779
chr13	36230215	36230685
chr13	36297552	36297861
chr13	36309267	36310100
chr13	36315299	36315942
chr13	36938349	36938678
chr13	37100357	37100808
chr13	37233674	37233959
chr13	37246616	37247039
chr13	37506236	37506657
chr13	37510073	37510434
chr13	38558659	38558873
chr13	38719903	38720183
chr13	38792646	38793184
chr13	39811620	39812057
chr13	40036369	40037016
chr13	40460118	40460883
chr13	40493508	40494162
chr13	41815467	41815660
chr13	43332850	43332980
chr13	43552231	43552630
chr13	43771700	43772038
chr13	45930647	45931153
chr13	46514274	46514649
chr13	46518294	46518762
chr13	46521549	46521978
chr13	46525546	46526131
chr13	46534402	46534686
chr13	46542028	46542812
chr13	46598711	46598999
chr13	46619663	46620049
chr13	46728068	46728339
chr13	47011748	47012316
chr13	47027152	47027488
chr13	47043864	47044690
chr13	47045526	47045661
chr13	47079193	47079697
chr13	47836497	47836670
chr13	48106254	48106621
chr13	48917426	48918052
chr13	49677964	49678346
chr13	49759901	49760315
chr13	50320490	50320708
chr13	51995973	51996342
chr13	52214435	52214770
chr13	52215011	52215126
chr13	52249204	52249786
chr13	53015203	53015672
chr13	53021793	53021992
chr13	53022153	53022301
chr13	53029676	53030067
chr13	54013102	54013686
chr13	54014575	54015269
chr13	54015807	54016427
chr13	54020053	54020626
chr14	167373	168103
chr14	433548	433856
chr14	619356	619516
chr14	988791	989019
chr14	1070904	1071277
chr14	1151404	1151755
chr14	1538107	1538533
chr14	1762425	1762844
chr14	1956688	1957029
chr14	4535732	4536133
chr14	4876793	4877141
chr14	5167994	5168124
chr14	5168246	5169108
chr14	5177658	5178059
chr14	5386865	5387462
chr14	5395360	5396084
chr14	5474808	5475336
chr14	5519778	5520179
chr14	5563385	5563471
chr14	5688336	5688815
chr14	5688900	5689000
chr14	6376488	6376879
chr14	7094228	7094477
chr14	7097432	7098832
chr14	7214258	7214731
chr14	7988357	7988835
chr14	8517907	8518376
chr14	9593438	9593748
chr14	10777036	10777657
chr14	11235770	11235954
chr14	11262518	11262845
chr14	13064152	13064897
chr14	14088949	14089700
chr14	14923677	14923749
chr14	14926237	14926341
chr14	15313042	15313734
chr14	15313921	15314146
chr14	15374559	15374796
chr14	15379931	15380520
chr14	15385157	15385472
chr14	17183513	17183604
chr14	18183685	18183933
chr14	18268970	18269183
chr14	18318998	18319479
chr14	18323693	18324334
chr14	18477437	18477684
chr14	18478608	18479021
chr14	18493616	18493994
chr14	18698724	18699046
chr14	18730236	18730443
chr14	18731771	18732607
chr14	18837882	18838463
chr14	18839065	18839273
chr14	19139727	19139821
chr14	19528263	19528615
chr14	19644192	19644472
chr14	19657896	19658010
chr14	19661948	19662922
chr14	20342367	20342544
chr14	21271547	21271745
chr14	21380116	21380647
chr14	21466778	21467099
chr14	21477253	21477496
chr14	21477585	21477875
chr14	21533535	21533704
chr14	21611068	21611405
chr14	21922392	21922634
chr14	22063478	22064151
chr14	22146802	22147438
chr14	22206364	22206471
chr14	22831923	22832918
chr14	24390984	24391248
chr14	24466182	24466784
chr14	25203472	25203794
chr14	25470725	25471026
chr14	25484801	25485124
chr14	25845277	25845966
chr14	25920067	25920713
chr14	26481601	26481821
chr14	26500317	26500761
chr14	26623334	26623517
chr14	26665618	26665741
chr14	26903520	26903799
chr14	26930348	26930642
chr14	26965412	26965825
chr14	27387579	27388214
chr14	27606965	27607139
chr14	27644340	27644839
chr14	27647201	27648183
chr14	27656256	27656683
chr14	27679444	27680093
chr14	27684182	27684631
chr14	27686975	27687819
chr14	27688443	27688881
chr14	27697507	27697889
chr14	27710241	27710520
chr14	27713803	27714228
chr14	27715180	27715516
chr14	27715977	27716113
chr14	27716232	27716470
chr14	27716829	27717184
chr14	27752444	27752644
chr14	28290475	28290964
chr14	28308308	28308751
chr14	28497420	28497751
chr14	28899437	28899680
chr14	30200884	30201253
chr14	30201508	30201748
chr14	30360006	30360368
chr14	30721588	30722170
chr14	30762060	30762621
chr14	30779610	30779831
chr14	30786843	30787099
chr14	31416781	31417045
chr14	31724618	31724842
chr14	31979835	31980840
chr14	31983444	31984225
chr14	32017759	32018051
chr14	32019840	32020226
chr14	32034791	32035329
chr14	32047017	32047356
chr14	32339787	32339986
chr14	32340119	32340365
chr14	32772971	32773673
chr14	32773815	32774454
chr14	32779198	32779405
chr14	32816714	32816894
chr14	32820844	32821361
chr14	32839866	32840036
chr14	32851468	32851620
chr14	32854067	32854599
chr14	32886405	32886703
chr14	32891732	32892072
chr14	32909060	32909394
chr14	32931246	32931747
chr14	32940837	32941178
chr14	32943127	32943369
chr14	32977055	32977386
chr14	32979495	32980122
chr14	32981234	32981643
chr14	32981816	32981992
chr14	32987960	32988290
chr14	32991161	32991892
chr14	33423324	33423883
chr14	33509104	33509863
chr14	33511224	33511397
chr14	33511562	33512021
chr14	33514777	33514980
chr14	33517058	33517367
chr14	33522206	33522571
chr14	33523244	33523901
chr14	33533008	33533167
chr14	33540069	33540714
chr14	33552125	33552407
chr14	33585367	33586037
chr14	33596859	33597454
chr14	33760849	33761194
chr14	33767288	33767669
chr14	33769189	33769411
chr14	33795556	33796122
chr14	33818631	33818920
chr14	33842771	33843297
chr14	33847007	33847513
chr14	34185777	34186027
chr14	34291001	34291375
chr14	34440207	34440414
chr14	34722591	34722933
chr14	34728822	34729220
chr14	34985278	34985759
chr14	35625403	35625698
chr14	36181935	36183084
chr14	36216575	36216850
chr14	37126647	37126810
chr14	37450814	37451066
chr14	37593508	37593956
chr14	37594305	37594632
chr14	37594910	37595253
chr14	37598486	37598815
chr14	37728566	37729094
chr14	37758053	37758313
chr14	38470541	38471246
chr14	38476894	38477600
chr14	38823082	38823485
chr14	38824174	38824446
chr14	38879410	38880223
chr14	38911269	38911672
chr14	38912434	38912732
chr14	38946282	38946758
chr14	38956183	38956621
chr14	39037901	39038616
chr14	40692488	40693066
chr14	40733107	40733382
chr14	40935566	40936485
chr14	41069913	41070201
chr14	41210599	41211717
chr14	41318202	41318565
chr14	41466740	41466945
chr14	41477266	41477669
chr14	41500773	41501111
chr14	41505855	41506613
chr14	41530634	41530799
chr14	41531612	41532276
chr14	41563710	41564127
chr14	41574037	41574949
chr14	41600319	41600720
chr14	41603512	41603755
chr14	41603880	41604122
chr14	41645673	41645964
chr14	41646018	41646442
chr14	41670825	41671303
chr14	43147934	43148281
chr14	44318099	44318633
chr14	44385652	44386100
chr14	44394254	44395101
chr14	44396207	44396670
chr14	44402030	44402385
chr14	44406444	44407263
chr14	44408178	44408458
chr14	44408820	44409279
chr14	44409310	44409406
chr14	44595263	44595702
chr14	44983944	44984508
chr14	45116269	45116552
chr14	45116617	45116961
chr14	45120231	45120713
chr14	45359963	45360360
chr14	45907992	45908454
chr14	47201451	47201679
chr14	48043960	48044419
chr14	48048459	48048861
chr14	48078102	48078482
chr14	48319182	48319627
chr14	48354079	48354212
chr14	49100978	49101356
chr14	50816650	50817375
chr14	50820474	50821054
chr14	50847655	50848177
chr14	50898610	50898962
chr14	50937186	50937713
chr14	50942831	50943628
chr14	51533054	51533189
chr14	51957929	51958221
chr15	90377	90892
chr15	2313659	2313960
chr15	2417792	2418411
chr15	3433051	3433368
chr15	3457040	3457532
chr15	3558870	3559381
chr15	3711998	3712194
chr15	3720554	3721163
chr15	3764608	3765206
chr15	4363371	4364314
chr15	4879435	4880446
chr15	6780880	6781260
chr15	7014886	7015121
chr15	7103555	7103843
chr15	7114406	7114601
chr15	7264834	7265101
chr15	8352339	8352973
chr15	8383314	8383766
chr15	8591330	8591702
chr15	8795441	8795598
chr15	8885065	8885547
chr15	8885689	8885890
chr15	9053075	9053705
chr15	9093519	9093615
chr15	9093796	9094470
chr15	10300529	10300798
chr15	10301305	10301446
chr15	10301625	10301734
chr15	10302179	10302428
chr15	10305501	10305739
chr15	10546995	10547628
chr15	10601154	10601369
chr15	10629493	10629994
chr15	10723370	10723778
chr15	10728182	10728776
chr15	10732367	10732677
chr15	10768051	10768639
chr15	10772824	10773100
chr15	11011600	11011802
chr15	11906437	11906839
chr15	12147499	12147844
chr15	13377228	13377557
chr15	13681679	13682148
chr15	13747008	13747511
chr15	13750237	13750613
chr15	14062487	14063112
chr15	14072794	14073719
chr15	14085646	14085972
chr15	14086045	14086498
chr15	14092305	14093078
chr15	14469859	14470208
chr15	14511314	14511588
chr15	15011326	15011675
chr15	15023764	15024223
chr15	15248433	15248881
chr15	15248913	15249126
chr15	15271525	15271898
chr15	15279636	15279932
chr15	15295348	15295922
chr15	15299824	15300273
chr15	15301176	15301473
chr15	15302023	15302415
chr15	15302741	15303012
chr15	15304768	15305264
chr15	15311107	15311384
chr15	16614555	16615003
chr15	16971420	16971558
chr15	16989538	16990377
chr15	17022891	17023280
chr15	17039506	17039818
chr15	17234862	17235112
chr15	17235320	17235919
chr15	17238909	17239415
chr15	17243809	17244305
chr15	17288364	17288682
chr15	17447260	17447456
chr15	17519275	17519556
chr15	17520705	17520959
chr15	18071739	18072194
chr15	18797260	18797655
chr15	18974227	18974782
chr15	18977547	18978233
chr15	18983781	18983869
chr15	18985683	18986135
chr15	18989720	18990080
chr15	18990375	18990765
chr15	19428118	19428699
chr15	19430421	19430842
chr15	19431042	19431365
chr15	19432283	19432533
chr15	19432597	19433026
chr15	19464814	19465305
chr15	19709736	19709999
chr15	20288121	20288689
chr15	20364276	20364543
chr15	20839890	20840157
chr15	20881576	20882643
chr15	21314398	21314527
chr15	21393105	21393204
chr15	21774155	21774402
chr15	22266177	22266603
chr15	22319493	22320112
chr15	22770029	22770612
chr15	22930291	22930515
chr15	23128205	23128648
chr15	23301646	23301991
chr15	23312309	23312500
chr15	23995195	23995639
chr15	24030644	24030938
chr15	24472357	24472621
chr15	24794997	24795258
chr15	25229263	25229476
chr15	25719486	25719928
chr15	26436215	26436763
chr15	26448492	26448807
chr15	26541012	26541562
chr15	26551103	26551270
chr15	26552195	26552751
chr15	26564031	26564701
chr15	26604140	26604440
chr15	26669908	26670564
chr15	26672620	26673071
chr15	26718650	26718748
chr15	26722318	26722730
chr15	26777288	26777906
chr15	27224750	27225231
chr15	27717463	27717687
chr15	28031348	28031665
chr15	28047839	28048442
chr15	28058682	28059382
chr15	28063985	28064901
chr15	28075906	28076460
chr15	28080791	28081398
chr15	28099168	28099438
chr15	28103593	28103955
chr15	28104234	28104526
chr15	28108268	28108412
chr15	28130217	28130710
chr15	28370722	28371363
chr15	28376422	28376863
chr15	28412208	28412480
chr15	28435026	28435405
chr15	28436511	28436761
chr15	28730567	28731289
chr15	28959940	28960131
chr15	28960288	28960641
chr15	28995772	28995962
chr15	29050226	29050825
chr15	29105456	29105871
chr15	29118525	29118920
chr15	29119509	29120001
chr15	29127213	29127560
chr15	29247442	29247709
chr15	29953991	29954297
chr15	30014424	30014657
chr15	30374889	30375135
chr15	30375258	30375468
chr15	30558703	30559001
chr15	30745814	30746168
chr15	31319419	31319747
chr15	31320131	31320400
chr15	31323200	31323327
chr15	31338573	31338798
chr15	32394570	32394900
chr15	32949068	32949585
chr15	33066763	33066873
chr15	33091512	33091739
chr15	33332908	33333322
chr15	34751698	34752336
chr15	34779522	34779647
chr15	34779721	34779977
chr15	34796293	34796826
chr15	34851319	34851657
chr15	35086126	35086435
chr15	35189240	35189502
chr15	35440749	35441033
chr15	36046220	36046953
chr15	36058305	36058669
chr15	36061240	36061326
chr15	36061558	36062250
chr15	36066989	36067511
chr15	36084144	36084705
chr15	36084805	36085014
chr15	37033882	37034112
chr15	37473881	37474188
chr15	37474277	37474802
chr15	37476815	37477407
chr15	37477550	37477711
chr15	37497411	37497986
chr15	37510607	37511284
chr15	37516516	37516970
chr15	37528193	37528660
chr15	37561708	37561864
chr15	37573410	37573942
chr15	37576933	37577242
chr15	37740013	37740463
chr15	38211216	38212062
chr15	38246630	38247073
chr15	38420120	38420582
chr15	39194582	39195433
chr15	39372678	39372921
chr15	40361361	40361967
chr15	40541305	40541859
chr15	40734177	40734421
chr15	40734656	40735017
chr15	40736364	40736755
chr15	41266414	41266890
chr15	42052707	42052785
chr15	42053146	42053987
chr15	43346870	43347146
chr15	44410031	44410156
chr15	44423088	44424595
chr15	44459318	44459870
chr15	44985111	44985278
chr15	45827331	45827760
chr15	45884769	45885063
chr15	46175897	46176245
chr15	46195832	46196330
chr15	46428335	46428902
chr16	450722	451175
chr16	453977	454816
chr16	818593	818881
chr16	820404	821011
chr16	854533	855102
chr16	938834	939656
chr16	939760	940005
chr16	979596	980011
chr16	981963	982607
chr16	1062211	1062538
chr16	1126331	1126708
chr16	1303828	1304243
chr16	1305025	1305647
chr16	1391838	1392110
chr16	1452746	1453169
chr16	1480346	1481005
chr16	3261537	3261743
chr16	3926387	3927203
chr16	3948805	3949259
chr16	4906194	4906675
chr16	5110342	5110690
chr16	5320512	5320983
chr16	5626057	5626393
chr16	6273523	6273660
chr16	6766988	6767332
chr16	6774933	6775556
chr16	6780523	6781423
chr16	6786910	6787261
chr16	6795172	6795582
chr16	6934269	6934429
chr16	6945430	6945648
chr16	7431027	7431549
chr16	7452206	7452821
chr16	7460958	7461511
chr16	7464178	7464537
chr16	7523828	7524143
chr16	7534846	7535172
chr16	7539332	7539751
chr16	7540128	7540405
chr16	7609300	7609604
chr16	7649649	7649917
chr16	7722590	7722980
chr16	8086828	8087120
chr16	8355573	8355960
chr16	8671500	8671752
chr16	8720543	8720725
chr16	8727128	8727888
chr16	8734194	8734729
chr16	8751501	8751598
chr16	8949331	8949838
chr16	8950107	8950575
chr16	8954690	8954926
chr16	8975357	8975772
chr16	8999470	8999831
chr16	9015192	9015958
chr16	9027401	9027733
chr16	9524410	9524541
chr16	9711752	9712151
chr16	9935857	9936463
chr16	10325314	10325853
chr16	11462094	11462200
chr16	11462361	11462577
chr16	11463064	11463642
chr16	11467969	11468082
chr16	11468349	11468774
chr16	11936220	11936789
chr16	12183142	12183605
chr16	12186561	12186946
chr16	12743151	12743499
chr16	12793100	12794023
chr16	12794546	12794687
chr16	15024845	15025046
chr16	15167293	15167631
chr16	16165397	16165763
chr16	16309020	16309351
chr16	16638243	16640768
chr16	16641034	16641233
chr16	16642244	16642497
chr16	16692889	16693296
chr16	17003721	17003807
chr16	17005018	17005506
chr16	17018520	17018705
chr16	17051245	17051626
chr16	17074306	17074437
chr16	17442652	17443017
chr16	17453881	17454157
chr16	17645118	17645339
chr16	17811554	17811794
chr16	18392864	18393038
chr16	18397790	18398425
chr16	18756821	18757178
chr16	18764439	18764572
chr16	18765082	18765462
chr16	18766377	18766605
chr16	18899752	18900518
chr16	20290589	20290863
chr16	20806344	20806817
chr16	20877919	20878330
chr16	21206981	21207294
chr16	21332977	21333468
chr16	21340507	21340715
chr16	21360950	21361367
chr16	21368279	21368419
chr16	21368483	21368910
chr16	21369372	21369513
chr16	21398017	21398272
chr16	21399587	21400149
chr16	21400935	21401777
chr16	21401840	21402539
chr16	21402688	21404438
chr16	21440158	21441181
chr16	21457406	21457875
chr16	21489168	21489392
chr16	21718192	21718702
chr16	22459199	22459639
chr16	22978293	22978630
chr16	23010052	23010153
chr16	23010327	23010563
chr16	23010891	23011454
chr16	23011538	23011830
chr16	23014872	23014999
chr16	23052478	23053159
chr16	23195014	23195249
chr16	23743880	23744340
chr16	23845261	23845591
chr16	23846503	23846891
chr16	24748434	24748858
chr16	24775996	24776427
chr16	25105039	25105505
chr16	25207790	25207983
chr16	25511565	25511964
chr16	25526060	25526753
chr16	25527279	25527726
chr16	25834128	25834398
chr16	25845676	25846028
chr16	26301338	26301513
chr16	26314739	26314949
chr16	26318833	26319105
chr16	26337680	26338166
chr16	26350602	26351641
chr16	26357868	26358486
chr16	26359035	26359162
chr16	26361701	26362083
chr16	26363342	26363754
chr16	26373502	26373772
chr16	26401261	26401404
chr16	26443738	26443992
chr16	26750669	26751066
chr16	26871197	26871442
chr16	27102005	27102331
chr16	29654847	29655067
chr16	31271702	31271934
chr16	31275275	31275585
chr16	31292131	31292356
chr16	31332569	31332809
chr16	31392440	31392815
chr16	31450879	31451207
chr16	31468250	31468908
chr16	31474727	31475210
chr16	31485789	31486143
chr16	31488810	31489194
chr16	31489341	31489460
chr16	31800017	31800592
chr16	32389942	32390047
chr16	33219634	33220025
chr16	33458569	33458748
chr16	33459997	33460247
chr16	34136536	34136837
chr16	34663985	34664859
chr16	34684851	34685150
chr16	34685219	34685476
chr16	34691346	34691859
chr16	34832027	34832945
chr16	34860778	34861259
chr16	34870191	34870603
chr16	34905265	34905619
chr16	35004496	35004917
chr16	35062132	35062428
chr16	35063533	35064334
chr16	35258130	35258442
chr16	35440299	35440748
chr16	35730004	35730582
chr16	35731484	35732556
chr16	35737371	35737669
chr16	35798207	35799146
chr16	35801703	35801944
chr16	35802650	35803054
chr16	35808129	35808661
chr16	35860813	35861387
chr16	35904352	35904739
chr16	35906451	35907582
chr16	35907762	35908119
chr16	36367349	36367431
chr16	36492480	36493227
chr16	38011010	38011162
chr16	38417221	38417335
chr16	38424144	38424815
chr16	39196885	39197175
chr16	39197267	39197448
chr16	39272708	39273103
chr16	39279198	39279619
chr16	39423642	39424199
chr16	39430247	39430759
chr16	39434010	39434432
chr16	39464382	39464885
chr16	39629018	39629496
chr16	39631834	39632208
chr16	39633450	39633765
chr16	39639315	39639801
chr16	39999916	40000069
chr16	40745998	40746604
chr16	40766139	40766735
chr16	40823537	40823815
chr16	41363391	41363998
chr16	41688040	41688292
chr16	41704048	41704500
chr16	41719308	41719737
chr16	41769111	41769635
chr16	41782695	41782933
chr16	42304728	42304931
chr16	42855403	42855739
chr16	42962631	42963353
chr16	43109970	43110228
chr16	43421803	43422172
chr16	43446246	43446599
chr16	43452418	43452764
chr16	43539363	43539690
chr16	44532069	44532543
chr16	44866574	44867458
chr16	45079168	45079463
chr16	45163757	45164019
chr16	45172624	45173143
chr16	45735197	45735816
chr16	45741730	45742037
chr16	45742513	45742878
chr16	45999365	45999824
chr16	46068524	46069066
chr16	47691173	47691572
chr16	47693699	47694555
chr16	49075046	49075893
chr16	49284965	49285436
chr16	49293009	49293460
chr16	49293913	49294117
chr16	49307954	49308787
chr16	49311500	49311848
chr16	49313981	49314457
chr16	49317531	49317988
chr16	49340999	49341347
chr16	49932463	49933786
chr16	52222160	52222442
chr16	52871866	52872483
chr16	54591445	54592018
chr16	54688754	54689198
chr16	54700500	54700997
chr16	55025614	55026242
chr16	55209845	55210282
chr16	55879318	55879483
chr16	55981507	55981738
chr16	56346917	56347368
chr16	56541891	56542269
chr16	56592681	56593076
chr16	56601634	56601929
chr16	56605028	56605404
chr16	56635317	56635636
chr16	56651851	56652534
chr16	56820157	56820338
chr16	57000853	57001061
chr16	57451898	57452384
chr16	57454439	57455775
chr16	57494195	57494449
chr16	57498610	57498904
chr16	58390635	58390747
chr17	698023	698660
chr17	1049279	1050021
chr17	1059383	1060209
chr17	1120775	1121301
chr17	1122244	1122585
chr17	1537068	1537292
chr17	2926529	2927677
chr17	4279871	4279934
chr17	5409367	5409558
chr17	6580792	6581277
chr17	6718546	6718735
chr17	6780497	6780923
chr17	6836392	6836519
chr17	7442872	7443135
chr17	7443337	7443548
chr17	7966080	7966833
chr17	8544143	8544549
chr17	9048823	9049384
chr17	9457482	9457725
chr17	10070205	10070633
chr17	10130353	10130826
chr17	10149165	10149679
chr17	10231794	10232216
chr17	10257433	10257899
chr17	10278529	10278925
chr17	10736907	10737152
chr17	10781744	10782089
chr17	10783671	10784291
chr17	10810728	10811076
chr17	10832564	10832792
chr17	10852950	10853523
chr17	10932042	10932619
chr17	10935221	10935714
chr17	11006181	11006373
chr17	11186792	11187133
chr17	11189400	11190144
[truncated: 4,642 more rows]

## Sheet: 1e
chr1	293136	293346
chr1	479044	479236
chr1	1032284	1032382
chr1	1396214	1396325
chr1	1435772	1435954
chr1	1522774	1523010
chr1	1529197	1529325
chr1	3949220	3949469
chr1	4908764	4909001
chr1	5846694	5846816
chr1	6158358	6158553
chr1	6746046	6746351
chr1	6749330	6749437
chr1	11009337	11009410
chr1	11025421	11025548
chr1	12293098	12293289
chr1	14119452	14119755
chr1	14464636	14464895
chr1	14473457	14473699
chr1	14822700	14822860
chr1	15022990	15023058
chr1	15477845	15478074
chr1	19948439	19948724
chr1	20439363	20439526
chr1	20553532	20553685
chr1	20559583	20559661
chr1	20561002	20561104
chr1	20583225	20583659
chr1	22818063	22818355
chr1	23008630	23008749
chr1	24356524	24356694
chr1	24769101	24769261
chr1	25230508	25230611
chr1	28792981	28793258
chr1	29630945	29631103
chr1	31002433	31002681
chr1	33520688	33520865
chr1	34985124	34985391
chr1	35007197	35007287
chr1	35441205	35441426
chr1	36026249	36026389
chr1	37777922	37778040
chr1	39209847	39210054
chr1	39547281	39547456
chr1	39574380	39574493
chr1	39757394	39757541
chr1	41279418	41279676
chr1	41282354	41282500
chr1	42806331	42806533
chr1	42957640	42957837
chr1	43168969	43169286
chr1	43175280	43175448
chr1	45299199	45299390
chr1	46011767	46011918
chr1	46458647	46458792
chr1	46694461	46694642
chr1	46698158	46698389
chr1	46747207	46747598
chr1	47031421	47031741
chr1	47761879	47762067
chr1	49889260	49889461
chr1	50219715	50219876
chr1	50850081	50850234
chr1	51422649	51422811
chr1	51454496	51454705
chr1	51689682	51689872
chr1	53570850	53571147
chr1	54311036	54311386
chr1	54768665	54768845
chr1	55419982	55420147
chr1	55833090	55833245
chr1	56283017	56283275
chr1	56283755	56283897
chr1	56284986	56285132
chr1	56683696	56683861
chr1	56960742	56960820
chr1	57479323	57479387
chr1	57498399	57498554
chr1	59599472	59599710
chr1	60325198	60325396
chr10	729803	730322
chr10	758873	758976
chr10	769645	770224
chr10	1057794	1058285
chr10	1304694	1304845
chr10	1804446	1804583
chr10	1868248	1868473
chr10	9303610	9303757
chr10	9622115	9622295
chr10	10205384	10205766
chr10	10208371	10208578
chr10	11398074	11398226
chr10	12809610	12809831
chr10	14662574	14662726
chr10	18917568	18917708
chr10	19077186	19077478
chr10	20720298	20720444
chr10	21104638	21105100
chr10	21259450	21259691
chr10	21310767	21310901
chr10	22222598	22222841
chr10	22783614	22783826
chr10	22791251	22791405
chr10	23897648	23897909
chr10	24067285	24067493
chr10	24745853	24746030
chr10	26268088	26268219
chr10	26795345	26795594
chr10	26813740	26813966
chr10	26944759	26944888
chr10	27867111	27867246
chr10	28113042	28113249
chr10	28444844	28444997
chr10	28471962	28472166
chr10	29185908	29186217
chr10	30822156	30822370
chr10	32311739	32312034
chr10	32374653	32374788
chr10	32522394	32522724
chr10	32544913	32545131
chr10	32745358	32745581
chr10	33120027	33120173
chr10	33129225	33129349
chr10	38426373	38426822
chr10	39019345	39019756
chr10	39490681	39490919
chr10	41081476	41081739
chr10	42412190	42412422
chr10	42814845	42815188
chr10	43391751	43391895
chr10	43490062	43490319
chr10	43762786	43763010
chr10	44867960	44868125
chr10	44936607	44936923
chr10	44975984	44976108
chr10	44978792	44979004
chr10	45030923	45031404
chr10	45091388	45091672
chr10	45296892	45297005
chr10	45495335	45495523
chr10	45544606	45544741
chr10	46471820	46471979
chr11	793107	793328
chr11	1592163	1592394
chr11	1991709	1991991
chr11	2659001	2659318
chr11	2825505	2825964
chr11	3144218	3144501
chr11	3849235	3849505
chr11	3866392	3866583
chr11	4954971	4955173
chr11	5686599	5686837
chr11	5799626	5799716
chr11	7578513	7578791
chr11	8053138	8053581
chr11	8665064	8665281
chr11	10720535	10720671
chr11	14036180	14036337
chr11	14234575	14234682
chr11	14867268	14867592
chr11	16943859	16944005
chr11	17303160	17303320
chr11	18562711	18562945
chr11	18743938	18744187
chr11	19303680	19303863
chr11	19749064	19749237
chr11	21172527	21172776
chr11	21591309	21591457
chr11	23050702	23050930
chr11	26758145	26758264
chr11	27763244	27763460
chr11	27776032	27776198
chr11	29936033	29936147
chr11	30310665	30310965
chr11	31759078	31759225
chr11	33122027	33122484
chr11	33278659	33279056
chr11	33513777	33513925
chr11	35280106	35280244
chr11	37240432	37240722
chr11	37530142	37530308
chr11	37601150	37601323
chr11	37653188	37653468
chr11	37758129	37758354
chr11	38407072	38407309
chr11	38445334	38445612
chr11	39065750	39066142
chr11	39346313	39346483
chr11	41116846	41117024
chr11	42385263	42385433
chr11	42394316	42394523
chr11	43035746	43035971
chr11	43119082	43119267
chr11	43121198	43121432
chr11	43304816	43305045
chr11	44939856	44940194
chr11	45193901	45194064
chr11	45773854	45774023
chr11	46610252	46610398
chr12	632315	632577
chr12	1773787	1773906
chr12	2121453	2121786
chr12	2276582	2276824
chr12	3101778	3101946
chr12	3932826	3933136
chr12	4003046	4003185
chr12	5850130	5850428
chr12	7212913	7213149
chr12	8951902	8952285
chr12	10865272	10865409
chr12	11524150	11524358
chr12	12152668	12152904
chr12	13029002	13029197
chr12	17304404	17304657
chr12	17425695	17425921
chr12	21508665	21508890
chr12	22806909	22807267
chr12	26303913	26304034
chr12	28211610	28211819
chr12	30264275	30264443
chr12	31802469	31802709
chr12	32625193	32625658
chr12	32693719	32693887
chr12	32698327	32698540
chr12	32699520	32699770
chr12	32709454	32709543
chr12	32721400	32721690
chr12	32834569	32834868
chr12	34745658	34746104
chr12	35787115	35787443
chr12	36740273	36740493
chr12	38121879	38122141
chr12	38378322	38378472
chr12	39107594	39107849
chr12	40005406	40005723
chr12	40117672	40117970
chr12	40129688	40129949
chr12	40162068	40162313
chr12	42999246	42999411
chr12	43348578	43348682
chr12	43349831	43349938
chr12	43777705	43777893
chr12	44210826	44211031
chr12	45181886	45182044
chr12	45369860	45370060
chr12	45574259	45574369
chr12	46778787	46779093
chr12	46857996	46858254
chr12	47808521	47808764
chr12	48636589	48636870
chr12	49275137	49275374
chr12	49495701	49496143
chr12	49540423	49540576
chr12	49888946	49889196
chr13	183918	184101
chr13	483128	483229
chr13	1108337	1108863
chr13	1167369	1167887
chr13	1198461	1198591
chr13	1477750	1477899
chr13	1487454	1487848
chr13	1699105	1699271
chr13	1815910	1816037
chr13	2319761	2320070
chr13	2801762	2802056
chr13	3549676	3549882
chr13	3550733	3550947
chr13	5072308	5072498
chr13	5700224	5700565
chr13	6364865	6365216
chr13	9922145	9922517
chr13	10058797	10059064
chr13	10160737	10161063
chr13	10609646	10609767
chr13	10824814	10825081
chr13	10855701	10855989
chr13	11007144	11007378
chr13	12460181	12460261
chr13	13009790	13010084
chr13	14865249	14865371
chr13	14925996	14926169
chr13	15018934	15019165
chr13	18809602	18809835
chr13	19546865	19547014
chr13	19806742	19806925
chr13	20401910	20402237
chr13	23108191	23108299
chr13	26338086	26338251
chr13	26735492	26735702
chr13	27158794	27159019
chr13	28553876	28554135
chr13	28610142	28610600
chr13	28948970	28949201
chr13	29783720	29783925
chr13	29914257	29914546
chr13	29965915	29966127
chr13	30079033	30079236
chr13	30525846	30526032
chr13	31519865	31520037
chr13	35528387	35528501
chr13	36921389	36921497
chr13	37097881	37097970
chr13	39417294	39417625
chr13	40161389	40161501
chr13	43923439	43923679
chr13	44191073	44191252
chr13	44912469	44912719
chr13	45117671	45117887
chr13	45322612	45323023
chr13	45685211	45685382
chr13	45901732	45902058
chr13	46679744	46680097
chr13	46938590	46938892
chr13	47004519	47004659
chr13	47148053	47148365
chr13	48127110	48127330
chr13	48479574	48479774
chr13	48776664	48776824
chr13	48914657	48914854
chr13	49134492	49134711
chr13	49623195	49623269
chr13	49695172	49695368
chr13	49708243	49708469
chr13	49917853	49918053
chr13	50265083	50265462
chr13	51708975	51709438
chr13	52240362	52240734
chr13	52254930	52255037
chr13	52484985	52485190
chr13	53022639	53022754
chr13	53022903	53023105
chr13	53864660	53864876
chr13	53930441	53930623
chr13	54036441	54036756
chr14	1147257	1147356
chr14	4928366	4928508
chr14	4987836	4988105
chr14	5056270	5056704
chr14	5371154	5371404
chr14	5789238	5789625
chr14	8271691	8271946
chr14	10108696	10108805
chr14	11508002	11508201
chr14	12021348	12021575
chr14	12035707	12035785
chr14	14755264	14755540
chr14	14833242	14833570
chr14	14903166	14903371
chr14	14905269	14905430
chr14	16519104	16519339
chr14	18293032	18293165
chr14	21285830	21285984
chr14	21400833	21401080
chr14	21546312	21546524
chr14	22337062	22337390
chr14	26088190	26088342
chr14	26577954	26578153
chr14	26664995	26665150
chr14	26704364	26704468
chr14	26704659	26704824
chr14	27082286	27082445
chr14	27579558	27579696
chr14	28775694	28775864
chr14	29223106	29223603
chr14	29433812	29434052
chr14	30715073	30715190
chr14	31568845	31568998
chr14	32701464	32701587
chr14	33436623	33437047
chr14	34981335	34981562
chr14	34991494	34991809
chr14	35052560	35052697
chr14	36257640	36258153
chr14	36276198	36276405
chr14	36279272	36279434
chr14	36280440	36280589
chr14	37696787	37696912
chr14	38519152	38519405
chr14	39464063	39464186
chr14	41090085	41090297
chr14	41132082	41132284
chr14	41213577	41213768
chr14	41441332	41441451
chr14	45957443	45957649
chr14	48098542	48098848
chr14	48969160	48969357
chr14	48985307	48985447
chr14	48985885	48986038
chr14	49372686	49372922
chr14	49555675	49555806
chr14	50721996	50722051
chr14	50908487	50908812
chr14	51345718	51345934
chr14	51962950	51963352
chr14	52568034	52568200
chr14	52728812	52729087
chr14	53025272	53025599
chr14	53379516	53379678
chr15	339882	340085
chr15	1802823	1802948
chr15	3034905	3035463
chr15	3495017	3495192
chr15	6275301	6275687
chr15	7870058	7870257
chr15	7961271	7961466
chr15	9089248	9089467
chr15	9146364	9146552
chr15	10539488	10539572
chr15	10643256	10643549
chr15	12357562	12357700
chr15	12859306	12859422
chr15	13294498	13294757
chr15	13685886	13686265
chr15	14529175	14529496
chr15	20572214	20572430
chr15	22810944	22811157
chr15	24549419	24549617
chr15	26486703	26486886
chr15	26599184	26599615
chr15	26609009	26609224
chr15	26716701	26716959
chr15	27109297	27109615
chr15	29115588	29115862
chr15	29459247	29459372
chr15	29943214	29943403
chr15	30087903	30088292
chr15	31322846	31322996
chr15	32815192	32815639
chr15	32874092	32874227
chr15	33637952	33638125
chr15	34806382	34806775
chr15	34889956	34890157
chr15	34891304	34891564
chr15	34893563	34893906
chr15	35178543	35178831
chr15	35755134	35755370
chr15	36510015	36510093
chr15	37468966	37469224
chr15	37559474	37559809
chr15	38019382	38019579
chr15	38073659	38073959
chr15	38189585	38189804
chr15	38725654	38725735
chr15	38725903	38726004
chr15	39297173	39297381
chr15	39897435	39897642
chr15	40227704	40227911
chr15	40712768	40712958
chr15	41987408	41987648
chr15	42176366	42176522
chr15	44844303	44844566
chr15	46024307	46024395
chr15	46375405	46375719
chr15	46389522	46389720
chr15	46539458	46539703
chr15	46733971	46734353
chr15	46972704	46972936
chr16	511034	511164
chr16	577334	577431
chr16	616194	616373
chr16	832843	833017
chr16	2308667	2308903
chr16	2493788	2494106
chr16	2534681	2535064
chr16	2785890	2786129
chr16	3013882	3014075
chr16	4534419	4534716
chr16	6435946	6436095
chr16	7488769	7488910
chr16	9047321	9047643
chr16	9074667	9074951
chr16	9797135	9797513
chr16	12851642	12851882
chr16	13844995	13845131
chr16	15468589	15468822
chr16	16162755	16163124
chr16	18821205	18821365
chr16	19852607	19853234
chr16	19988773	19989031
chr16	20824935	20825177
chr16	23737141	23737372
chr16	25143405	25143635
chr16	28549668	28549846
chr16	30752859	30753105
chr16	31351657	31352168
chr16	31432580	31432904
chr16	31472133	31472362
chr16	31473373	31473612
chr16	31475904	31476189
chr16	31531050	31531180
chr16	33175152	33175366
chr16	34080760	34081303
chr16	34232328	34232423
chr16	34604035	34604269
chr16	34732264	34732594
chr16	34760820	34761340
chr16	34872526	34872798
chr16	35087052	35087279
chr16	35122297	35122544
chr16	35562558	35562756
chr16	35653999	35654186
chr16	35771628	35771985
chr16	35903958	35904106
chr16	35926965	35927201
chr16	39345425	39345683
chr16	40671738	40671836
chr16	41020640	41020776
chr16	41562836	41562978
chr16	42852478	42852688
chr16	42953984	42954142
chr16	43523006	43523261
chr16	45692588	45692713
chr16	46931728	46932020
chr16	47045785	47045943
chr16	51595615	51595775
chr16	51662045	51662377
chr16	51808624	51809005
chr16	52833162	52833533
chr16	52983117	52983336
chr16	53000346	53000748
chr16	55248312	55248715
chr16	56095896	56095982
chr16	56096241	56096373
chr16	57279168	57279271
chr16	57315430	57315661
chr17	468	552
chr17	1285976	1286170
chr17	2266728	2266843
chr17	5843512	5843778
chr17	7027554	7027947
chr17	7094412	7094558
chr17	7367439	7367559
chr17	8672561	8672715
chr17	10954946	10955235
chr17	11159436	11159729
chr17	12726680	12726913
chr17	16219789	16219916
chr17	17480395	17480699
chr17	17830195	17830447
chr17	17849178	17849408
chr17	18417070	18417274
chr17	19385588	19385842
chr17	20256935	20257086
chr17	20896216	20896339
chr17	20908851	20908938
chr17	21233755	21234143
chr17	21272293	21272416
chr17	21616070	21616378
chr17	21621532	21621676
chr17	21623095	21623309
chr17	21896529	21896904
chr17	27081168	27081359
chr17	29062366	29062688
chr17	29065996	29066263
chr17	29089225	29089571
chr17	29138986	29139297
chr17	29167712	29167802
chr17	30605289	30605710
chr17	31094338	31094482
chr17	31718722	31718881
chr17	32703621	32703723
chr17	34197093	34197178
chr17	34877212	34877333
chr17	35226211	35226396
chr17	35697175	35697530
chr17	35917897	35918085
chr17	37774000	37774223
chr17	37828534	37828614
chr17	38785509	38785646
chr17	38837237	38837403
chr17	39397854	39397986
chr17	39793257	39793387
chr17	41545031	41545111
chr17	41578402	41578576
chr17	41962188	41962600
chr17	43120273	43120505
chr17	44270651	44270861
chr17	44370134	44370391
chr17	44393508	44393697
chr17	46105534	46106029
chr17	47570860	47570976
chr17	48392922	48393321
chr17	50385388	50385526
chr17	51052038	51052194
chr17	52067607	52067765
chr17	52851481	52851873
chr18	113618	113901
chr18	1696708	1696828
chr18	3912315	3912501
chr18	4958747	4959142
chr18	5213506	5213643
chr18	5422733	5422925
chr18	7020793	7020952
chr18	7245061	7245245
chr18	7273378	7274351
chr18	7834372	7834457
chr18	8090630	8090953
chr18	8111439	8111775
chr18	8138053	8138156
chr18	8182990	8183134
chr18	8608470	8608733
chr18	9346322	9346630
chr18	9586434	9586653
chr18	9835189	9835454
chr18	11183566	11183886
chr18	12067026	12067109
chr18	13965289	13965552
chr18	14883339	14883628
chr18	14905094	14905291
chr18	15540590	15540710
chr18	16156067	16156125
chr18	17263614	17263885
chr18	19641194	19641296
chr18	19878071	19878391
chr18	21822212	21822556
chr18	22408280	22408533
chr18	22448202	22448403
chr18	22534365	22534489
chr18	22980610	22980931
chr18	23238381	23238562
chr18	23497449	23497560
chr18	23520284	23520416
chr18	23614568	23614728
chr18	24299333	24299630
chr18	24468756	24468851
chr18	24573913	24574125
chr18	24583513	24583743
chr18	26496769	26497059
chr18	26620241	26620489
chr18	27680018	27680369
chr18	28877834	28877954
chr18	30355998	30356239
chr18	32363878	32363995
chr18	34296837	34297241
chr18	34707443	34707603
chr18	35319479	35319913
chr18	35339918	35340300
chr18	36844821	36845082
chr18	36982263	36982493
chr18	37018015	37018171
chr18	37071264	37071671
chr18	37094762	37094982
chr18	43570249	43570701
chr18	44321267	44321550
chr18	45582359	45582491
chr18	46337478	46337900
chr18	46865128	46865486
chr18	49390532	49390868
chr18	49734186	49734406
chr19	795753	796067
chr19	870786	871047
chr19	878506	878901
chr19	925169	925335
chr19	1029010	1029167
chr19	1104059	1104262
chr19	1142371	1142500
chr19	1144140	1144409
chr19	1236225	1236452
chr19	1899967	1900288
chr19	1936739	1937233
chr19	1967940	1968111
chr19	2744943	2745074
chr19	3231028	3231273
chr19	4152526	4152745
chr19	4213768	4213892
chr19	4236009	4236305
chr19	4717128	4717367
chr19	5510680	5510770
chr19	6880619	6880847
chr19	6886279	6886482
chr19	6926979	6927185
chr19	7053961	7054162
chr19	8645218	8645339
chr19	9205518	9205711
chr19	9447220	9447344
chr19	9578206	9578330
chr19	10544333	10544485
chr19	10747647	10747876
chr19	11424669	11424825
chr19	13229568	13229832
chr19	13797351	13797510
chr19	15843749	15844029
chr19	17202377	17202575
chr19	17715133	17715299
chr19	22062140	22062327
chr19	22200616	22200862
chr19	22286115	22286471
chr19	22480043	22480362
chr19	23020554	23020764
chr19	23023354	23023541
chr19	24442277	24442556
chr19	25149052	25149414
chr19	25710123	25710322
chr19	26574592	26574793
chr19	27235458	27235645
chr19	28182001	28182326
chr19	28470899	28471166
chr19	28472725	28472894
chr19	29596390	29596723
chr19	30853448	30853863
chr19	33312064	33312302
chr19	33319600	33319766
chr19	33760207	33760611
chr19	33831585	33831723
chr19	34051586	34051861
chr19	34205612	34205726
chr19	34395033	34395229
chr19	34746485	34746600
chr19	35415686	35415955
chr19	36361913	36362044
chr19	37738058	37738401
chr19	37992473	37992591
chr19	39062771	39062911
chr19	39129453	39129582
chr19	39155269	39155566
chr19	39304625	39304817
chr19	39819489	39819694
chr19	40296180	40296431
chr19	40361160	40361297
chr19	42105724	42105929
chr19	42169906	42170305
chr19	42405614	42405826
chr19	43307712	43307884
chr19	45712893	45713300
chr19	46953203	46953449
chr19	47742386	47742681
chr19	48374202	48374370
chr19	48831103	48831230
chr19	48866994	48867350
chr19	49169666	49169999
chr19	49441736	49441866
chr19	49483448	49483563
chr19	49495253	49495374
chr19	49548388	49548699
chr2	150815	151203
chr2	762657	762795
chr2	1021701	1021893
chr2	3720179	3720357
chr2	5923693	5923862
chr2	7909590	7909991
chr2	10053748	10054002
chr2	11654596	11654791
chr2	11706788	11707004
chr2	11859925	11860188
chr2	12698720	12698909
chr2	14791310	14791478
chr2	15038525	15038682
chr2	16037715	16038230
chr2	16155579	16155723
chr2	17621976	17622104
chr2	20162639	20162884
chr2	23391386	23391639
chr2	28604615	28604769
chr2	29423947	29424221
chr2	29437035	29437218
chr2	29634558	29634655
chr2	29687977	29688217
chr2	29703418	29704004
chr2	31018588	31018749
chr2	34131283	34131642
chr2	34196051	34196197
chr2	36957232	36957485
chr2	38676505	38676742
chr2	40885425	40885707
chr2	41479625	41480041
chr2	42970498	42970693
chr2	44438958	44439116
chr2	45105804	45106006
chr2	45459828	45459969
chr2	45993330	45993526
chr2	46504682	46504858
chr2	46594558	46594855
chr2	46605677	46605877
chr2	46925819	46926061
chr2	48083663	48084034
chr2	49357854	49358290
chr2	49685751	49685861
chr2	50548238	50548811
chr2	50849261	50849417
chr2	50940191	50940396
chr2	51046821	51047017
chr2	53104799	53104974
chr2	54104500	54104703
chr2	54730584	54730757
chr2	54917290	54917467
chr2	55055499	55056046
chr2	55311440	55311665
chr2	55557775	55557876
chr2	56567711	56567814
chr2	57953651	57953967
chr2	58008338	58008536
chr2	58016465	58016688
chr2	58833896	58834093
chr2	58987760	58987890
chr2	59085617	59085747
chr2	59086963	59087080
chr2	59676998	59677130
chr20	678820	679011
chr20	1930958	1931223
chr20	2415181	2415458
chr20	3600975	3601369
chr20	4226749	4226848
chr20	4304935	4305188
chr20	4505589	4505900
chr20	4634078	4634305
chr20	5026063	5026645
chr20	5042163	5042490
chr20	5601112	5601395
chr20	5879982	5880170
chr20	6805204	6805354
chr20	8000122	8000258
chr20	8630278	8630482
chr20	8647691	8648077
chr20	8911801	8911900
chr20	9195586	9195906
chr20	13792391	13792632
chr20	16121156	16121338
chr20	20524290	20524628
chr20	20608587	20608667
chr20	20632068	20632352
chr20	21130608	21131110
chr20	21174197	21174433
chr20	21248398	21248637
chr20	21280037	21280273
chr20	21469519	21469717
chr20	21498991	21499245
chr20	21735901	21736188
chr20	22496899	22497064
chr20	23221245	23221552
chr20	24051128	24051447
chr20	24349736	24349894
chr20	24806748	24807135
chr20	28150409	28150702
chr20	30158042	30158177
chr20	30286464	30286722
chr20	31939415	31939713
chr20	32482320	32482671
chr20	32487256	32487368
chr20	32497437	32497817
chr20	37805142	37805422
chr20	37826671	37826834
chr20	38932920	38933202
chr20	40595567	40595677
chr20	42164584	42164713
chr20	42569233	42569351
chr20	43888164	43888357
chr20	44242526	44242750
chr20	44404196	44404511
chr20	44914358	44914530
chr20	44936319	44936518
chr20	45042737	45043042
chr20	45600148	45600447
chr20	46801997	46802098
chr20	46802519	46802757
chr20	47505762	47505926
chr20	48102891	48103041
chr20	48384455	48384776
chr20	48385201	48385401
chr20	48905448	48905709
chr20	49221589	49221852
chr20	49273462	49273541
chr20	51894414	51894584
chr20	52344411	52344654
chr20	52355307	52355443
chr20	53098256	53098480
chr20	53711652	53711879
chr20	54323174	54323330
chr20	54457083	54457484
chr21	156460	156783
chr21	157404	157576
chr21	328093	328431
chr21	403688	404114
chr21	895931	896019
chr21	1015592	1015774
chr21	1017776	1017976
chr21	1529924	1530183
chr21	1649669	1649847
chr21	2067066	2067356
chr21	2071945	2072208
chr21	3001603	3001819
chr21	3065121	3065488
chr21	3068954	3069177
chr21	3071260	3071477
chr21	3124827	3125013
chr21	3309857	3310077
chr21	3357882	3358144
chr21	3386725	3386842
chr21	3389844	3390092
chr21	3402192	3402330
chr21	4459463	4459671
chr21	4648246	4648386
chr21	4709307	4709476
chr21	5121356	5121620
chr21	5412644	5412837
chr21	5689213	5689395
chr21	6126646	6126827
chr21	6217635	6217752
chr21	6315618	6315782
chr21	6570507	6570730
chr21	6970582	6970717
chr21	6971477	6971606
chr21	7520599	7520726
chr21	7718552	7719033
chr21	7850681	7850850
chr21	7941241	7941530
chr21	7987955	7988307
chr21	8117148	8117378
chr21	9291279	9291519
chr21	10215907	10215988
chr21	10845135	10845306
chr21	11737784	11738088
chr21	11749888	11750055
chr21	14000233	14000367
chr21	14164451	14164874
chr21	14248197	14248369
chr21	14248396	14248526
chr21	15292915	15293072
chr21	15990326	15990502
chr21	17884609	17884740
chr21	17915291	17915452
chr21	18401252	18401494
chr21	19540892	19541028
chr21	19676339	19676565
chr21	19685237	19685582
chr21	19685689	19685834
chr21	19689885	19690157
chr21	19708438	19708741
chr21	19708881	19709011
chr21	22886217	22886713
chr21	23249924	23250177
chr21	23255471	23255621
chr21	23599370	23599622
chr21	24285700	24285900
chr21	26047435	26047615
chr21	28583089	28583222
chr21	32434761	32435065
chr21	35450699	35451146
chr21	35740936	35741228
chr21	37412431	37412837
chr21	39772900	39773053
chr21	39785420	39785551
chr21	41017495	41017596
chr21	43929905	43930256
chr21	43931093	43931278
chr21	43931833	43931988
chr21	44025769	44026185
chr21	44074535	44074732
chr22	7694	7991
chr22	213808	213909
chr22	414523	414763
chr22	800157	800352
chr22	983142	983422
chr22	2415299	2415718
chr22	2596148	2596339
chr22	7710113	7710450
chr22	7761713	7761895
chr22	11317424	11317646
chr22	13141426	13141572
chr22	13167459	13167721
chr22	14846431	14846694
chr22	15091007	15091127
chr22	15886216	15886380
chr22	17146290	17146567
chr22	17210294	17210633
chr22	17857945	17858099
chr22	20761609	20761745
chr22	21655460	21655690
chr22	22858415	22858719
chr22	24353847	24354132
chr22	24544181	24544381
chr22	24584489	24584781
chr22	24655863	24656053
chr22	24933553	24933822
chr22	25034843	25035064
chr22	25045095	25045515
chr22	26942680	26942839
chr22	26943093	26943254
chr22	26949627	26950269
chr22	27536759	27536865
chr22	29219656	29219737
chr22	29847306	29847452
chr22	31340629	31341007
chr22	31346382	31346612
chr22	32027470	32027752
chr22	35243555	35243726
chr22	36063383	36063539
chr22	36766306	36766477
chr22	37284541	37284836
chr22	37473042	37473290
chr22	37685536	37685869
chr22	39026368	39026722
chr22	40160614	40160831
chr22	40213557	40213724
chr22	40428731	40429006
chr22	41021250	41021572
chr22	41031041	41031311
chr22	41031493	41031723
chr22	41350537	41350745
chr22	41599601	41599913
chr23	229461	229641
chr23	537471	537581
chr23	538341	538424
chr23	2866162	2866307
chr23	2904420	2904549
chr23	3429247	3429490
chr23	3760375	3760459
chr23	5236886	5236974
chr23	5341678	5341784
chr23	5371480	5371807
chr23	5866697	5866932
chr23	7915833	7916074
chr23	7932686	7932953
chr23	7969821	7969911
chr23	8004507	8004759
chr23	11411439	11411605
chr23	11653338	11653481
chr23	12392259	12392501
chr23	13220214	13220522
chr23	14353546	14353683
chr23	14539187	14539420
chr23	15722333	15722663
chr23	15833865	15834349
chr23	16574036	16574390
chr23	16575404	16575659
chr23	16590874	16591125
chr23	17372164	17372351
chr23	17489833	17490071
chr23	18634228	18634346
chr23	19444915	19445046
chr23	19693414	19693570
chr23	21178842	21178974
chr23	21765876	21766097
chr23	22949678	22949806
chr23	23410059	23410182
chr23	24140804	24141002
chr23	24202541	24202827
chr23	24625113	24625296
chr23	25069337	25069593
chr23	28579360	28579645
chr23	28589861	28590116
chr23	28934276	28934471
chr23	31030531	31030921
chr23	31644003	31644341
chr23	33001463	33001651
chr23	33146706	33146799
chr23	33496923	33497139
chr23	34538069	34538228
chr23	34558067	34558338
chr23	34821553	34821640
chr23	38321333	38321584
chr23	41281088	41281251
chr23	41406743	41407020
chr23	41447329	41447736
chr23	43959818	43959999
chr23	44300131	44300330
chr23	44505468	44505720
chr23	44619521	44619633
chr23	45235471	45235604
chr23	45736644	45736921
chr23	45860871	45861119
chr23	46007391	46007605
chr23	46043845	46044434
chr24	322113	322307
chr24	516910	517104
chr24	1195213	1195423
chr24	1337078	1337223
chr24	1831941	1832107
chr24	2181434	2181549
chr24	2763337	2763824
chr24	3139347	3139504
chr24	3183217	3183334
chr24	3195944	3196083
chr24	4530216	4530426
chr24	4946756	4947007
chr24	5046471	5046758
chr24	5968375	5968472
chr24	7532774	7532971
chr24	7744769	7745006
chr24	8231715	8231855
chr24	10386816	10387052
chr24	11389443	11389649
chr24	11500954	11501134
chr24	11596131	11596212
chr24	11765205	11765306
chr24	12549027	12549369
chr24	14285993	14286169
chr24	18821170	18821379
chr24	20090949	20091357
chr24	20277784	20277961
chr24	22183178	22183500
chr24	22206719	22206888
chr24	22629513	22629636
chr24	23774745	23774910
chr24	25161533	25161722
chr24	28481459	28481791
chr24	31612523	31612704
chr24	32108918	32109100
chr24	33192672	33192870
chr24	33260186	33260396
chr24	34102599	34102868
chr24	36022698	36022852
chr24	36169248	36169443
chr24	36659567	36659777
chr24	40218929	40219086
chr24	40345280	40345821
chr24	40600856	40600979
chr24	42788618	42788955
chr24	43702725	43702840
chr24	43782093	43782265
chr25	276180	276396
chr25	528678	528801
chr25	798274	798524
chr25	1369025	1369226
chr25	1905445	1905752
chr25	2102750	2103089
chr25	3034681	3034850
chr25	3376359	3376577
chr25	4093691	4093833
chr25	5174252	5174427
chr25	6555899	6556093
chr25	6757589	6757785
chr25	6985664	6985846
chr25	7037117	7037263
chr25	7721460	7721547
chr25	8747391	8747654
chr25	8757520	8757796
chr25	8765299	8765693
chr25	8770870	8771241
chr25	8772502	8772660
chr25	8777185	8777601
chr25	10532317	10532579
chr25	11494196	11494394
chr25	11791068	11791561
chr25	12572739	12573058
chr25	14720504	14720768
chr25	14968690	14968973
chr25	15036358	15036701
chr25	15243417	15243610
chr25	15304109	15304276
chr25	15406690	15406817
chr25	15407565	15407918
chr25	15883744	15883902
chr25	17007171	17007370
chr25	19149588	19149811
chr25	20788627	20788850
chr25	22016603	22016885
chr25	22024154	22024357
chr25	23317575	23317870
chr25	26318549	26318891
chr25	29053933	29054105
chr25	30869319	30869449
chr25	34167269	34167463
chr25	34218872	34219004
chr25	34849799	34849990
chr25	35708545	35709055
chr25	35983913	35984108
chr3	1650138	1650213
chr3	2089858	2089965
chr3	2186777	2187051
chr3	2516492	2516666
chr3	2550455	2550663
chr3	2551513	2551820
chr3	3527135	3527351
chr3	4051741	4051835
chr3	5744264	5744431
chr3	5754296	5754478
chr3	6825516	6825987
chr3	8193251	8193401
chr3	8469566	8469904
chr3	9057815	9058175
chr3	10282460	10282622
chr3	10741813	10742001
chr3	12277837	12278049
chr3	12696898	12697289
chr3	14302997	14303300
chr3	14355382	14355584
chr3	14455237	14455448
chr3	14472707	14472986
chr3	14518988	14519258
chr3	15307948	15308109
chr3	16369354	16369509
chr3	17040825	17040989
chr3	17560915	17561377
chr3	18290693	18290823
chr3	18378603	18378755
chr3	18383408	18383600
chr3	21853191	21853559
chr3	22918015	22918302
chr3	23021632	23021766
chr3	23023442	23023679
chr3	24114682	24114892
chr3	24493835	24494091
chr3	26611981	26612158
chr3	26909909	26910230
chr3	26921753	26921868
chr3	28513973	28514083
chr3	29248478	29248879
chr3	29417016	29417290
chr3	30535270	30535527
chr3	30593938	30594066
chr3	30927986	30928104
chr3	32118006	32118145
chr3	32569345	32569740
chr3	34275056	34275346
chr3	35841595	35841695
chr3	36260809	36260907
chr3	39226435	39226544
chr3	42549158	42549244
chr3	43254476	43254723
chr3	43400945	43401066
chr3	46743677	46744038
chr3	47673435	47673607
chr3	49955671	49955820
chr3	51586319	51586472
chr3	52532424	52532646
chr3	54394991	54395270
chr3	59425067	59425172
chr3	60389144	60389362
chr3	60671495	60671745
chr3	60695787	60695896
chr3	60711940	60712028
chr3	60903650	60903977
chr3	60912170	60912319
chr3	61189680	61189844
chr3	61522095	61522223
chr3	63001343	63001530
chr3	63042723	63042831
chr4	416769	416871
chr4	547721	547930
chr4	1250549	1250773
chr4	1271214	1271389
chr4	3263283	3263416
chr4	3276728	3276911
chr4	3905640	3905998
chr4	5637216	5637591
chr4	5649690	5649876
chr4	5883691	5883979
chr4	5944425	5944575
chr4	6015356	6015623
chr4	6289489	6289607
chr4	7291807	7292165
chr4	7614281	7614469
chr4	8098262	8098343
chr4	10322137	10322476
chr4	10513754	10513868
chr4	11815395	11815519
chr4	12967019	12967117
chr4	14435882	14436135
chr4	14607506	14607673
chr4	14610391	14610545
chr4	15431680	15431936
chr4	15990726	15990843
chr4	16487585	16487733
chr4	17673130	17673214
chr4	17734376	17734731
chr4	18008335	18008547
chr4	18207708	18207969
chr4	18398532	18398697
chr4	18442341	18442557
chr4	20265040	20265357
chr4	22791680	22791768
chr4	22903629	22903800
chr4	23482210	23482540
chr4	23691956	23692169
chr4	24516281	24516478
chr4	25411455	25411672
chr4	27292763	27293032
chr4	28269508	28269756
chr4	32562289	32562457
chr4	35233920	35234269
chr4	37407511	37407720
chr4	37871904	37872062
chr4	40339808	40340081
chr4	40341114	40341347
chr4	43854409	43854649
chr4	43928052	43928146
chr4	43980752	43980922
chr4	48167250	48167453
chr4	51405255	51405350
chr4	52996407	52996547
chr4	52999247	52999539
chr4	53706439	53706690
chr4	53706949	53707020
chr4	53851065	53851284
chr4	54137546	54137761
chr4	55898594	55898882
chr4	59180469	59180633
chr4	59653371	59653552
chr4	61822824	61823031
chr5	85083	85326
chr5	134943	135304
chr5	178708	178832
chr5	718495	718822
chr5	945409	945672
chr5	1493984	1494253
chr5	2313045	2313304
chr5	2370288	2370498
chr5	2372070	2372222
chr5	2401704	2401883
chr5	2726817	2727130
chr5	2881666	2881869
chr5	3422849	3423245
chr5	3835088	3835342
chr5	3835565	3835666
chr5	3926802	3927082
chr5	3981532	3981652
chr5	4385348	4385424
chr5	4707396	4707490
chr5	5028921	5029132
chr5	5099731	5100051
chr5	6399969	6400110
chr5	6532750	6532939
chr5	6537579	6537979
chr5	7164860	7165054
chr5	8180827	8181097
chr5	8181874	8182126
chr5	8396440	8396640
chr5	8556249	8556508
chr5	8799260	8799508
chr5	8800980	8801299
chr5	9033799	9033986
chr5	9498849	9498994
chr5	9801044	9801170
chr5	11121998	11122107
chr5	11926749	11926969
chr5	12455726	12455855
chr5	13181965	13182189
chr5	15600809	15601001
chr5	15650257	15650569
chr5	17441272	17441642
chr5	17866928	17867358
chr5	17904887	17905154
chr5	18890195	18890317
chr5	19106978	19107199
chr5	19297167	19297363
chr5	19313582	19313794
chr5	19386057	19386325
chr5	19730405	19730679
chr5	19776372	19776512
chr5	20116540	20116727
chr5	21186058	21186282
chr5	24275664	24275860
chr5	25778461	25778539
chr5	26310932	26311076
chr5	27134679	27134977
chr5	27164924	27165345
chr5	27452565	27452667
chr5	28906887	28907003
chr5	30123049	30123230
chr5	31225600	31226014
chr5	31682461	31682784
chr5	31682979	31683095
chr5	31935000	31935160
chr5	32332200	32332311
chr5	32332618	32332810
chr5	33261663	33261918
chr5	33262475	33262698
chr5	33780644	33780770
chr5	35504504	35504598
chr5	36705568	36705795
chr5	36789351	36789455
chr5	36871381	36871507
chr5	37810901	37811361
chr5	38529001	38529249
chr5	38533100	38533387
chr5	38534910	38535354
chr5	39346900	39347221
chr5	39935988	39936400
chr5	40440112	40440219
chr5	40465681	40465954
chr5	40565542	40565893
chr5	40645526	40645755
chr5	42037462	42037664
chr5	42170419	42170631
chr5	42239689	42239772
chr5	42273854	42274001
chr5	42388683	42388787
chr5	42416969	42417287
chr5	42611409	42611514
chr5	44061114	44061211
chr5	46018564	46018856
chr5	46626342	46626595
chr5	46642277	46642542
chr5	46683506	46683713
chr5	47593781	47593888
chr5	49576000	49576316
chr5	50508785	50508975
chr5	50511031	50511367
chr5	51098003	51098384
chr5	51857044	51857218
chr5	52023830	52024070
chr5	55471000	55471265
chr5	57670589	57670868
chr5	58299620	58299726
chr5	58820711	58820913
chr5	58831242	58831448
chr5	58841754	58841965
chr5	58875404	58875604
chr5	59585652	59585816
chr5	61109314	61109504
chr5	62250365	62250497
chr5	62579882	62580005
chr5	65465347	65465471
chr5	65493745	65494017
chr5	67747860	67747979
chr5	69573824	69574131
chr5	71037238	71037579
chr5	73502405	73502602
chr5	74715213	74715449
chr5	74902028	74902511
chr5	74906127	74906439
chr5	74975229	74975400
chr5	75408735	75409052
chr6	102461	102683
chr6	1074209	1074324
chr6	1136185	1136402
chr6	1818427	1818750
chr6	2522567	2522889
chr6	2668396	2668641
chr6	2745134	2745346
chr6	2762719	2762935
chr6	2931003	2931214
chr6	3223951	3224122
chr6	3360966	3361208
chr6	3393541	3393849
chr6	3598526	3598692
chr6	3944018	3944365
chr6	4300412	4300654
chr6	4767590	4767914
chr6	4959787	4959993
chr6	6431750	6432042
chr6	6451916	6452231
chr6	6478776	6479208
chr6	7864094	7864189
chr6	9041935	9042157
chr6	9049855	9050051
chr6	9698952	9699353
chr6	10633123	10633275
chr6	11133815	11134114
chr6	12252890	12253015
chr6	13678024	13678286
chr6	14239535	14239666
chr6	14278631	14278845
chr6	14702966	14703250
chr6	14856013	14856168
chr6	16002592	16002756
chr6	16057474	16057734
chr6	16060574	16060974
chr6	19215493	19215651
chr6	21068230	21068443
chr6	21077912	21078069
chr6	22776116	22776195
chr6	25380911	25381161
chr6	25610006	25610180
chr6	25713556	25713789
chr6	25849549	25849662
chr6	26174801	26174885
chr6	26443555	26443807
chr6	29485325	29485486
chr6	30537626	30537858
chr6	30548194	30548356
chr6	31953796	31954020
chr6	31955222	31955420
chr6	32763646	32763813
chr6	33008215	33008485
chr6	33121466	33121861
chr6	34547800	34547905
chr6	34766475	34766890
chr6	35269629	35269871
chr6	36449880	36450179
chr6	36476488	36476811
chr6	36644322	36644678
chr6	39345507	39345646
chr6	39398741	39398865
chr6	41597104	41597313
chr6	41640578	41640877
chr6	42551448	42551659
chr6	42571908	42572076
chr6	42582285	42582409
chr6	42775247	42775456
chr6	42795389	42795657
chr6	43819721	43819905
chr6	43963709	43964175
chr6	44732963	44733199
chr6	48095393	48095617
chr6	49621473	49621749
chr6	50892828	50892999
chr6	51204511	51204732
chr6	53161810	53162082
chr6	54000438	54000643
chr6	54015277	54015517
chr6	54557796	54558032
chr6	54858364	54858616
chr6	56225932	56226288
chr6	56325740	56325931
chr6	56850311	56850537
chr6	57657862	57657958
chr6	57697226	57697835
chr6	58581630	58581883
chr6	58599281	58599396
chr6	59423078	59423238
chr6	59747944	59748225
chr7	1673079	1673204
chr7	1737926	1738159
chr7	1749195	1749272
chr7	4346142	4346355
chr7	8022445	8022665
chr7	8384401	8384549
chr7	8385052	8385297
chr7	9098302	9098375
chr7	9104802	9105011
chr7	10240038	10240398
chr7	10603434	10603868
chr7	12077024	12077227
chr7	12719124	12719374
chr7	13084651	13084787
chr7	13312557	13312800
chr7	15051280	15051872
chr7	15182569	15182808
chr7	15226357	15226577
chr7	15236354	15236725
chr7	16016488	16016778
chr7	16237805	16238000
chr7	16638031	16638315
chr7	16651325	16651495
chr7	16751375	16751477
chr7	16775590	16775817
chr7	16807863	16808116
chr7	16826331	16826413
chr7	17186688	17187117
chr7	17521225	17521455
chr7	17610299	17610473
chr7	17646317	17646521
chr7	17824482	17824806
chr7	17828155	17828448
chr7	17834445	17834567
chr7	17968208	17968420
chr7	17971651	17971892
chr7	22183567	22183749
chr7	23052957	23053064
chr7	23927758	23927924
chr7	25117458	25117611
chr7	25643111	25643254
chr7	29242786	29243152
chr7	32125882	32126047
chr7	35244340	35244560
chr7	35879044	35879366
chr7	36141308	36141532
chr7	37034023	37034417
chr7	37063007	37063305
chr7	39040199	39040434
chr7	39869266	39869499
chr7	39969222	39969383
chr7	40293500	40293697
chr7	40293761	40293914
chr7	41863124	41863515
chr7	42515000	42515402
chr7	43101002	43101286
chr7	47245731	47246026
chr7	47852439	47852615
chr7	47877733	47877953
chr7	49547227	49547471
chr7	50515624	50515820
chr7	50515964	50516164
chr7	51011236	51011465
chr7	54642619	54642832
chr7	54690248	54690519
chr7	55466164	55466372
chr7	55938149	55938272
chr7	56989173	56989452
chr7	57187298	57187569
chr7	58051550	58051737
chr7	59311216	59311408
chr7	62093080	62093377
chr7	62117770	62118153
chr7	62313142	62313345
chr7	65508965	65509054
chr7	68834876	68835054
chr7	69340626	69340882
chr7	69474974	69475417
chr7	70436605	70436833
chr7	71742930	71743118
chr7	72090678	72090898
chr7	72352374	72352508
chr7	72485198	72485515
chr7	73372453	73372598
chr7	73737206	73737395
chr7	74071315	74071487
chr7	74167805	74167935
chr7	74267258	74267725
chr7	75330122	75330262
chr7	75525209	75525510
chr7	75603920	75604240
chr7	75664546	75664837
chr7	75835666	75835818
chr7	75836472	75836783
chr7	76087778	76088155
chr8	202604	202837
chr8	224559	225057
chr8	559331	559419
chr8	1418237	1418450
chr8	1555501	1555606
chr8	2078350	2078581
chr8	2863818	2863954
chr8	3003010	3003265
chr8	3128262	3128391
chr8	3142262	3142523
chr8	3192442	3192747
chr8	3251237	3251385
chr8	3256589	3256768
chr8	3311589	3311776
chr8	4698015	4698092
chr8	4778026	4778348
chr8	5007341	5007539
chr8	5157160	5157403
chr8	5347884	5348027
chr8	5813873	5814049
chr8	5821830	5822084
chr8	6275954	6276102
chr8	8041713	8041967
chr8	8141813	8142115
chr8	8388099	8388253
chr8	9010782	9010935
chr8	11260558	11260648
chr8	11272334	11272579
chr8	11705416	11705638
chr8	13537427	13537634
chr8	13537843	13537952
chr8	14828113	14828277
chr8	14917886	14918075
chr8	14949124	14949413
chr8	15049519	15049732
chr8	16064090	16064254
chr8	17750205	17750295
chr8	19148661	19148787
chr8	19983337	19983444
chr8	20086065	20086128
chr8	20291264	20291655
chr8	20309376	20309627
chr8	21731829	21732049
chr8	24144296	24144611
chr8	24342093	24342334
chr8	24346124	24346182
chr8	27313823	27314031
chr8	27411240	27411514
chr8	27455585	27455951
chr8	27473615	27473881
chr8	29023950	29024108
chr8	29369021	29369166
chr8	29848363	29848503
chr8	29879383	29879672
chr8	29926332	29926412
chr8	30471916	30472154
chr8	31406371	31406493
chr8	32292707	32292777
chr8	33872986	33873097
chr8	34220176	34220430
chr8	34873058	34873354
chr8	36867615	36867722
chr8	38244612	38244809
chr8	40149669	40149824
chr8	41967231	41967385
chr8	43212988	43213247
chr8	43576507	43576607
chr8	44058055	44058134
chr8	47724511	47724686
chr8	49092468	49092717
chr8	49150106	49150304
chr8	49546323	49546478
chr8	50278651	50278967
chr8	50435420	50435557
chr8	50446917	50447138
chr8	50447213	50447337
chr8	50495039	50495263
chr8	50631879	50632185
chr8	50674818	50674945
chr8	50675310	50675515
chr8	52937414	52937479
chr8	53689449	53689643
chr8	55440826	55441009
chr8	55453760	55453867
chr9	1580450	1580702
chr9	2096857	2097155
chr9	2175568	2175799
chr9	2646555	2646899
chr9	3387645	3387832
chr9	3815480	3815711
chr9	6466287	6466601
chr9	6474803	6475042
chr9	6475451	6475605
chr9	7639360	7639554
chr9	7759627	7759851
chr9	10500309	10500630
chr9	10757180	10757441
chr9	11259690	11259895
chr9	15124914	15125188
chr9	15148074	15148364
chr9	15362281	15362450
chr9	16950652	16950843
chr9	18315535	18315719
chr9	19159383	19159518
chr9	19353683	19353776
chr9	20331165	20331432
chr9	22053570	22053759
chr9	22275267	22275379
chr9	22691628	22691822
chr9	22723596	22723825
chr9	22731958	22732220
chr9	22798710	22798898
chr9	23401273	23401460
chr9	23537616	23537904
chr9	23937273	23937418
chr9	25095999	25096123
chr9	27287398	27287965
chr9	27765129	27765341
chr9	28087949	28088308
chr9	29019527	29019713
chr9	29223285	29223417
chr9	29227215	29227464
chr9	31740286	31740524
chr9	32426402	32426706
chr9	33531057	33531187
chr9	33754011	33754319
chr9	33756129	33756340
chr9	33768183	33768339
chr9	33788502	33788654
chr9	34288265	34288460
chr9	35602847	35603069
chr9	38268324	38268532
chr9	38355322	38355668
chr9	38637585	38637961
chr9	38761135	38761271
chr9	39872796	39873023
chr9	39905023	39905383
chr9	40794849	40795045
chr9	42624272	42624388
chr9	44841057	44841230
chr9	45549631	45550001
chr9	48730744	48730845
chr9	48800722	48801182
chr9	48817500	48817707
chr9	48837809	48838086
chr9	48953587	48953796
chr9	50301377	50301598
chr9	50735554	50735878
chr9	50792959	50793249
chr9	51458011	51458426
chr9	52208753	52209176
chr9	52991765	52991921
chr9	53060992	53061101
chr9	53095440	53095799
chr9	53468360	53468556
chr9	54922860	54923137
chr9	55014628	55014951
chr9	55489605	55489747
chr9	56733524	56733666
chr9	57631302	57631523
chr1	109677	110101
chr1	293124	293278
chr1	479007	479303
chr1	493552	493759
chr1	625719	625923
chr1	1032242	1032615
chr1	1396205	1396354
chr1	1435731	1436024
chr1	1522477	1522595
chr1	1522788	1523080
chr1	1529148	1529357
chr1	1998283	1998381
chr1	2020711	2020957
chr1	2837771	2837949
chr1	3306523	3306669
chr1	3685809	3686030
chr1	3949144	3949564
chr1	4008991	4009503
chr1	4302516	4302729
chr1	4342100	4342246
chr1	4799666	4799856
chr1	4908628	4909050
chr1	4962851	4963005
chr1	5818221	5818411
chr1	5830206	5830380
chr1	5846654	5846829
chr1	5942659	5943274
chr1	6158343	6158572
chr1	6597500	6597608
chr1	6746052	6746364
chr1	6749216	6749446
chr1	7125430	7125555
chr1	7747998	7748173
chr1	8374541	8374696
chr1	10276168	10276393
chr1	10628423	10628777
chr1	10723619	10723976
chr1	11009066	11009403
chr1	11025211	11025562
chr1	11286753	11286985
chr1	11390953	11391142
chr1	11700734	11700846
chr1	12154779	12154885
chr1	12293038	12293311
chr1	13018487	13018761
chr1	13500119	13500208
chr1	14119415	14119798
chr1	14464636	14464901
chr1	14473461	14473699
chr1	14822695	14822892
chr1	15022875	15023124
chr1	15201615	15201748
chr1	15477788	15478175
chr1	15917703	15917862
chr1	16377554	16377760
chr1	16478530	16478608
chr1	17265838	17265992
chr1	17695231	17695387
chr1	19344067	19344341
chr1	19948416	19948749
chr1	20419866	20419971
chr1	20439290	20439675
chr1	20444746	20445051
chr1	20491638	20491858
chr1	20553446	20553773
chr1	20559538	20559683
chr1	20560854	20561332
chr1	20583160	20583797
chr1	20635360	20635662
chr1	22609328	22609623
chr1	22713267	22713354
chr1	22818035	22818398
chr1	22848705	22848970
chr1	22854100	22854375
chr1	22939776	22940169
chr1	23008586	23008832
chr1	23009311	23009383
chr1	23881736	23881884
chr1	24103155	24103268
chr1	24352418	24352659
chr1	24356472	24356827
chr1	24741793	24741983
chr1	24769024	24769293
chr1	25174572	25174963
chr1	25230490	25230700
chr1	25920188	25920677
chr1	26993672	26993804
chr1	27425861	27426005
chr1	27549532	27549629
chr1	28543386	28543624
chr1	28543688	28543809
chr1	28760131	28760447
chr1	28789763	28789978
chr1	28792835	28793277
chr1	29630714	29631100
chr1	29988389	29988552
chr1	30504636	30504735
chr1	30947168	30947255
chr1	30989104	30989275
chr1	31002248	31002810
chr1	31097847	31098387
chr1	31125314	31125415
chr1	31586491	31586678
chr1	32083746	32083859
chr1	32847785	32847907
chr1	33520669	33520887
chr1	33983823	33983907
chr1	34339098	34339217
chr1	34648592	34648730
chr1	34733149	34733386
chr1	34985150	34985416
chr1	35007109	35007284
chr1	35295865	35296097
chr1	35441210	35441473
chr1	36026170	36026471
chr1	36091100	36091286
chr1	36182279	36182396
chr1	37086222	37086368
chr1	37449391	37449631
chr1	37777856	37778041
chr1	39042516	39042768
chr1	39209871	39210062
chr1	39262035	39262226
chr1	39547237	39547458
chr1	39564453	39564683
chr1	39574355	39574566
chr1	39757166	39757595
chr1	39764823	39765081
chr1	39780116	39780470
chr1	39780510	39780752
chr1	39987435	39987672
chr1	41213603	41213897
chr1	41222073	41222552
chr1	41225233	41225623
chr1	41269163	41269404
chr1	41278264	41278399
chr1	41279378	41279706
chr1	41282323	41282572
chr1	41301551	41301787
chr1	41950502	41950657
chr1	42677089	42677243
chr1	42806311	42806590
chr1	42885499	42885611
chr1	42957631	42957853
chr1	43015482	43015649
chr1	43126449	43126743
chr1	43168783	43169481
chr1	43175085	43175529
chr1	44218552	44218714
chr1	45299214	45299393
chr1	45445056	45445459
chr1	46011712	46011970
chr1	46441303	46441501
chr1	46458586	46458959
chr1	46535867	46536200
chr1	46639530	46639846
chr1	46639939	46640032
chr1	46693821	46694293
chr1	46694428	46694647
chr1	46694933	46695049
chr1	46698146	46698469
chr1	46747194	46747605
chr1	46814541	46814721
chr1	47031443	47031730
chr1	47737842	47738076
chr1	47761879	47762082
chr1	47773776	47773978
chr1	48021546	48021697
chr1	48345236	48345291
chr1	48962628	48962715
chr1	49068942	49069211
chr1	49071453	49071856
chr1	49526641	49526869
chr1	49889295	49889483
chr1	50219602	50219920
chr1	50302228	50302405
chr1	50718512	50718745
chr1	50849977	50850346
chr1	50858546	50858864
chr1	50916079	50916265
chr1	51135740	51135843
chr1	51201140	51201371
chr1	51391686	51391950
chr1	51416912	51417095
chr1	51422645	51422877
chr1	51454502	51454919
chr1	51458235	51458405
chr1	51610243	51610402
chr1	51610637	51610757
chr1	51689577	51690129
chr1	52328709	52328813
chr1	52438970	52439177
chr1	53031362	53031429
chr1	53570727	53571157
chr1	54119592	54119702
chr1	54310983	54311483
chr1	54378428	54378573
chr1	54392182	54392300
chr1	54768145	54768551
chr1	54768670	54768892
chr1	54812362	54812569
chr1	54876729	54876846
chr1	55000823	55000888
chr1	55419946	55420264
chr1	55691817	55691922
chr1	55833061	55833255
chr1	55956816	55956943
chr1	55996046	55996181
chr1	56206569	56206687
chr1	56278169	56278348
chr1	56279591	56279949
chr1	56280248	56280325
chr1	56280847	56280973
chr1	56281032	56281416
chr1	56281591	56281704
chr1	56281953	56282369
chr1	56282707	56283599
chr1	56283641	56284240
chr1	56284453	56284634
chr1	56284947	56285158
chr1	56286204	56286496
chr1	56287106	56287219
chr1	56312662	56312776
chr1	56683634	56683917
chr1	56684491	56684645
chr1	56723158	56723351
chr1	56959869	56959979
chr1	56960697	56960899
chr1	57189640	57189778
chr1	57349728	57349830
chr1	57349880	57349969
chr1	57385748	57385875
chr1	57458440	57458561
chr1	57479297	57479450
chr1	57498385	57498573
chr1	57503060	57503181
chr1	57503381	57503553
chr1	57758999	57759105
chr1	58089176	58089304
chr1	58486502	58486577
chr1	58742834	58742923
chr1	58758059	58758342
chr1	58764295	58764454
[truncated: 5,305 more rows]

## Sheet: 1f
chr1	44433368	44433768
chr1	52297448	52297848
chr1	432036	432436
chr1	522163	522563
chr1	529544	529944
chr1	550330	550730
chr1	591810	592210
chr1	592475	592875
chr1	593289	593689
chr1	594137	594537
chr1	596915	597315
chr1	644676	645076
chr1	1203958	1204358
chr1	2086799	2087199
chr1	2113776	2114176
chr1	2119560	2119960
chr1	2120243	2120643
chr1	2125732	2126132
chr1	2155861	2156261
chr1	3406478	3406878
chr1	4292032	4292432
chr1	4549588	4549988
chr1	4855274	4855674
chr1	4930208	4930608
chr1	4936252	4936652
chr1	5030189	5030589
chr1	7730859	7731259
chr1	7731332	7731732
chr1	7732003	7732403
chr1	8551512	8551912
chr1	8552022	8552422
chr1	9016916	9017316
chr1	10197035	10197435
chr1	11201666	11202066
chr1	11430530	11430930
chr1	11440692	11441092
chr1	11441247	11441647
chr1	13000335	13000735
chr1	14046212	14046612
chr1	14047115	14047515
chr1	14088645	14089045
chr1	14105567	14105967
chr1	14107024	14107424
chr1	15176196	15176596
chr1	15313249	15313649
chr1	16060580	16060980
chr1	17285744	17286144
chr1	17377797	17378197
chr1	17399312	17399712
chr1	17453930	17454330
chr1	17590140	17590540
chr1	17613013	17613413
chr1	18132904	18133304
chr1	18142987	18143387
chr1	18144017	18144417
chr1	18144927	18145327
chr1	19373326	19373726
chr1	19599614	19600014
chr1	19964830	19965230
chr1	20390572	20390972
chr1	23231011	23231411
chr1	23334942	23335342
chr1	23785466	23785866
chr1	23791743	23792143
chr1	24065988	24066388
chr1	24085003	24085403
chr1	24193157	24193557
chr1	24193610	24194010
chr1	24412332	24412732
chr1	25253913	25254313
chr1	25293815	25294215
chr1	25583570	25583970
chr1	25590490	25590890
chr1	25595492	25595892
chr1	25603981	25604381
chr1	29460720	29461120
chr1	30132375	30132775
chr1	31287748	31288148
chr1	33006723	33007123
chr1	33044558	33044958
chr1	33191701	33192101
chr1	33378122	33378522
chr1	34207785	34208185
chr1	34243861	34244261
chr1	34245091	34245491
chr1	34248633	34249033
chr1	34260954	34261354
chr1	34263369	34263769
chr1	34294011	34294411
chr1	34299567	34299967
chr1	35250657	35251057
chr1	35626429	35626829
chr1	35627049	35627449
chr1	35629732	35630132
chr1	36524255	36524655
chr1	36686555	36686955
chr1	37228127	37228527
chr1	37533223	37533623
chr1	37591640	37592040
chr1	37817775	37818175
chr1	38558834	38559234
chr1	38768268	38768668
chr1	39881004	39881404
chr1	40692787	40693187
chr1	40776990	40777390
chr1	40843538	40843938
chr1	41530124	41530524
chr1	41619309	41619709
chr1	41620438	41620838
chr1	41924672	41925072
chr1	42170720	42171120
chr1	45252428	45252828
chr1	45362512	45362912
chr1	45511675	45512075
chr1	45643371	45643771
chr1	45651070	45651470
chr1	46251664	46252064
chr1	46723137	46723537
chr1	47066283	47066683
chr1	47100100	47100500
chr1	47258242	47258642
chr1	47327988	47328388
chr1	48145399	48145799
chr1	48145956	48146356
chr1	48243102	48243502
chr1	50188382	50188782
chr1	51237347	51237747
chr1	52485068	52485468
chr1	52729568	52729968
chr1	52786621	52787021
chr1	52799171	52799571
chr1	52806597	52806997
chr1	52812343	52812743
chr1	52876740	52877140
chr1	52885591	52885991
chr1	52915920	52916320
chr1	52994659	52995059
chr1	53805978	53806378
chr1	53825338	53825738
chr1	53828707	53829107
chr1	54414002	54414402
chr1	54467822	54468222
chr1	54675907	54676307
chr1	54719714	54720114
chr1	54731810	54732210
chr1	55282193	55282593
chr1	55592048	55592448
chr1	55673195	55673595
chr1	57298453	57298853
chr1	57653190	57653590
chr1	58098104	58098504
chr1	59211796	59212196
chr1	59491194	59491594
chr1	59491951	59492351
chr1	59765055	59765455
chr1	59766929	59767329
chr1	59806465	59806865
chr1	59947793	59948193
chr1	59948765	59949165
chr1	60098065	60098465
chr1	60099376	60099776
chr1	60101377	60101777
chr1	60104694	60105094
chr1	60255875	60256275
chr1	60285651	60286051
chr2	42074101	42074501
chr2	165130	165530
chr2	510345	510745
chr2	515906	516306
chr2	932240	932640
chr2	1571569	1571969
chr2	1747306	1747706
chr2	1760554	1760954
chr2	1906991	1907391
chr2	1909128	1909528
chr2	2991232	2991632
chr2	3452348	3452748
chr2	3572951	3573351
chr2	3696692	3697092
chr2	4222056	4222456
chr2	4318209	4318609
chr2	4321028	4321428
chr2	4439921	4440321
chr2	4957849	4958249
chr2	5082112	5082512
chr2	5905767	5906167
chr2	7458561	7458961
chr2	7730966	7731366
chr2	7881419	7881819
chr2	8444064	8444464
chr2	9324884	9325284
chr2	9334028	9334428
chr2	9371143	9371543
chr2	9412879	9413279
chr2	9794832	9795232
chr2	9795780	9796180
chr2	9863114	9863514
chr2	10195105	10195505
chr2	10237847	10238247
chr2	10272004	10272404
chr2	10539065	10539465
chr2	11516793	11517193
chr2	12131998	12132398
chr2	13972403	13972803
chr2	14944304	14944704
chr2	15071162	15071562
chr2	15318436	15318836
chr2	16060721	16061121
chr2	16067171	16067571
chr2	16111123	16111523
chr2	16111655	16112055
chr2	16794297	16794697
chr2	19255644	19256044
chr2	19259046	19259446
chr2	19259358	19259758
chr2	19270898	19271298
chr2	19567141	19567541
chr2	19924378	19924778
chr2	20695622	20696022
chr2	20764106	20764506
chr2	20811498	20811898
chr2	21683236	21683636
chr2	21902576	21902976
chr2	21903480	21903880
chr2	21903725	21904125
chr2	22059078	22059478
chr2	22253669	22254069
chr2	22254621	22255021
chr2	22292122	22292522
chr2	22300413	22300813
chr2	22322662	22323062
chr2	22444706	22445106
chr2	23115039	23115439
chr2	24069003	24069403
chr2	24551078	24551478
chr2	24603566	24603966
chr2	24912749	24913149
chr2	25078431	25078831
chr2	26434661	26435061
chr2	26438392	26438792
chr2	29183752	29184152
chr2	29560976	29561376
chr2	29596938	29597338
chr2	29599795	29600195
chr2	29614494	29614894
chr2	29765922	29766322
chr2	29906644	29907044
chr2	29907098	29907498
chr2	29959646	29960046
chr2	30002400	30002800
chr2	31397244	31397644
chr2	31429390	31429790
chr2	31508450	31508850
chr2	31508909	31509309
chr2	31556858	31557258
chr2	31798557	31798957
chr2	32446261	32446661
chr2	32988658	32989058
chr2	33021967	33022367
chr2	33029563	33029963
chr2	33045962	33046362
chr2	33059413	33059813
chr2	33095556	33095956
chr2	33404162	33404562
chr2	33477144	33477544
chr2	33485619	33486019
chr2	33574671	33575071
chr2	34223958	34224358
chr2	35271832	35272232
chr2	35439625	35440025
chr2	35443067	35443467
chr2	35443932	35444332
chr2	35446102	35446502
chr2	35710977	35711377
chr2	36303451	36303851
chr2	36617053	36617453
chr2	36619624	36620024
chr2	36860057	36860457
chr2	36973414	36973814
chr2	37040549	37040949
chr2	37182345	37182745
chr2	37255864	37256264
chr2	37317418	37317818
chr2	37320506	37320906
chr2	37347317	37347717
chr2	37402405	37402805
chr2	37456400	37456800
chr2	37465659	37466059
chr2	39801262	39801662
chr2	40823877	40824277
chr2	42184331	42184731
chr2	42560199	42560599
chr2	42672340	42672740
chr2	43798835	43799235
chr2	44472473	44472873
chr2	44563303	44563703
chr2	44659260	44659660
chr2	44849209	44849609
chr2	45564870	45565270
chr2	46402618	46403018
chr2	47680012	47680412
chr2	47742838	47743238
chr2	47807480	47807880
chr2	47853507	47853907
chr2	47903505	47903905
chr2	48273977	48274377
chr2	48289180	48289580
chr2	49489728	49490128
chr2	50039447	50039847
chr2	50442398	50442798
chr2	52018773	52019173
chr2	52449906	52450306
chr2	52654988	52655388
chr2	52667716	52668116
chr2	52670833	52671233
chr2	54986749	54987149
chr2	55308185	55308585
chr2	55308609	55309009
chr2	55874437	55874837
chr2	56271341	56271741
chr2	56895153	56895553
chr2	57834711	57835111
chr2	58130407	58130807
chr2	58131802	58132202
chr2	59505662	59506062
chr2	59659646	59660046
chr2	59664680	59665080
chr2	60061718	60062118
chr2	60215399	60215799
chr3	35913439	35913839
chr3	36568794	36569194
chr3	832678	833078
chr3	1651256	1651656
chr3	2109160	2109560
chr3	4349208	4349608
chr3	5787159	5787559
chr3	5803930	5804330
chr3	5839154	5839554
chr3	5888382	5888782
chr3	6539416	6539816
chr3	7175574	7175974
chr3	7533183	7533583
chr3	7811619	7812019
chr3	8296266	8296666
chr3	8645823	8646223
chr3	11896347	11896747
chr3	11899282	11899682
chr3	12054431	12054831
chr3	12627438	12627838
chr3	12681169	12681569
chr3	12686837	12687237
chr3	12735879	12736279
chr3	12845897	12846297
chr3	13192133	13192533
chr3	13486037	13486437
chr3	13514571	13514971
chr3	13737457	13737857
chr3	14504499	14504899
chr3	14821072	14821472
chr3	15385134	15385534
chr3	15399140	15399540
chr3	15399580	15399980
chr3	15406218	15406618
chr3	15676171	15676571
chr3	15726191	15726591
chr3	15764594	15764994
chr3	16156908	16157308
chr3	16418630	16419030
chr3	16435623	16436023
chr3	16435965	16436365
chr3	16795990	16796390
chr3	16799437	16799837
chr3	16817114	16817514
chr3	16931995	16932395
chr3	17826317	17826717
chr3	17826839	17827239
chr3	18527771	18528171
chr3	18582173	18582573
chr3	19108992	19109392
chr3	20040010	20040410
chr3	21005560	21005960
chr3	21368874	21369274
chr3	21548237	21548637
chr3	22590084	22590484
chr3	22599117	22599517
chr3	22656287	22656687
chr3	22880490	22880890
chr3	22909053	22909453
chr3	22909345	22909745
chr3	23152969	23153369
chr3	23279510	23279910
chr3	23452959	23453359
chr3	23631728	23632128
chr3	24972266	24972666
chr3	25357318	25357718
chr3	25442545	25442945
chr3	26010008	26010408
chr3	26055180	26055580
chr3	26062719	26063119
chr3	26172977	26173377
chr3	26239423	26239823
chr3	26263693	26264093
chr3	26826668	26827068
chr3	27797522	27797922
chr3	27801917	27802317
chr3	27833235	27833635
chr3	27849818	27850218
chr3	27896978	27897378
chr3	27953525	27953925
chr3	30127915	30128315
chr3	30182480	30182880
chr3	30305386	30305786
chr3	31040700	31041100
chr3	31259329	31259729
chr3	31546880	31547280
chr3	31802331	31802731
chr3	31998536	31998936
chr3	32426154	32426554
chr3	32426754	32427154
chr3	32533296	32533696
chr3	32533536	32533936
chr3	32554133	32554533
chr3	32554375	32554775
chr3	32626434	32626834
chr3	32643395	32643795
chr3	32705097	32705497
chr3	32708764	32709164
chr3	32996160	32996560
chr3	33078120	33078520
chr3	33575435	33575835
chr3	33678442	33678842
chr3	34242825	34243225
chr3	34572051	34572451
chr3	34595465	34595865
chr3	34632059	34632459
chr3	34632390	34632790
chr3	34746908	34747308
chr3	35252084	35252484
chr3	35590669	35591069
chr3	35590956	35591356
chr3	35592625	35593025
chr3	35659166	35659566
chr3	36158168	36158568
chr3	36209981	36210381
chr3	36275161	36275561
chr3	36344840	36345240
chr3	36349047	36349447
chr3	36362000	36362400
chr3	36697632	36698032
chr3	36698215	36698615
chr3	36699132	36699532
chr3	36702450	36702850
chr3	36711006	36711406
chr3	36722976	36723376
chr3	36819638	36820038
chr3	36823129	36823529
chr3	37000452	37000852
chr3	37042447	37042847
chr3	37061621	37062021
chr3	37564197	37564597
chr3	37689514	37689914
chr3	39338081	39338481
chr3	39384032	39384432
chr3	39396875	39397275
chr3	39455154	39455554
chr3	39476795	39477195
chr3	39489790	39490190
chr3	39497102	39497502
chr3	39621697	39622097
chr3	39621974	39622374
chr3	39626218	39626618
chr3	39652691	39653091
chr3	39671632	39672032
chr3	39673941	39674341
chr3	40420182	40420582
chr3	40435754	40436154
chr3	40529671	40530071
chr3	40531803	40532203
chr3	40532540	40532940
chr3	40625770	40626170
chr3	40737827	40738227
chr3	40791224	40791624
chr3	40960206	40960606
chr3	41556640	41557040
chr3	42005047	42005447
chr3	42008271	42008671
chr3	42037550	42037950
chr3	42623076	42623476
chr3	44113965	44114365
chr3	44250636	44251036
chr3	44254672	44255072
chr3	45321146	45321546
chr3	45346665	45347065
chr3	45835392	45835792
chr3	46312991	46313391
chr3	46365579	46365979
chr3	47566079	47566479
chr3	47590351	47590751
chr3	47625826	47626226
chr3	47661363	47661763
chr3	47743022	47743422
chr3	48323638	48324038
chr3	48326729	48327129
chr3	48380729	48381129
chr3	48824206	48824606
chr3	49417827	49418227
chr3	49440283	49440683
chr3	49767591	49767991
chr3	49773606	49774006
chr3	49774165	49774565
chr3	49775031	49775431
chr3	49890558	49890958
chr3	50649258	50649658
chr3	50651974	50652374
chr3	50772977	50773377
chr3	50775673	50776073
chr3	51775958	51776358
chr3	52321696	52322096
chr3	52418239	52418639
chr3	52418900	52419300
chr3	52450065	52450465
chr3	53699985	53700385
chr3	53984553	53984953
chr3	53984742	53985142
chr3	54025060	54025460
chr3	55476487	55476887
chr3	55824154	55824554
chr3	55852542	55852942
chr3	56370220	56370620
chr3	56376167	56376567
chr3	57862294	57862694
chr3	57986733	57987133
chr3	58335632	58336032
chr3	58466004	58466404
chr3	58497701	58498101
chr3	58575499	58575899
chr3	58576014	58576414
chr3	59626632	59627032
chr3	59655436	59655836
chr3	60548755	60549155
chr3	61061164	61061564
chr3	61849346	61849746
chr3	62094989	62095389
chr3	62185724	62186124
chr3	62571758	62572158
chr3	62821789	62822189
chr3	63086969	63087369
chr3	63112093	63112493
chr3	63140863	63141263
chr4	55574342	55574742
chr4	12975888	12976288
chr4	658217	658617
chr4	688316	688716
chr4	820405	820805
chr4	857689	858089
chr4	1443243	1443643
chr4	1612714	1613114
chr4	1888207	1888607
chr4	1897462	1897862
chr4	2385600	2386000
chr4	3850771	3851171
chr4	3950190	3950590
chr4	3956307	3956707
chr4	3958329	3958729
chr4	4303527	4303927
chr4	4304095	4304495
chr4	4424618	4425018
chr4	4428285	4428685
chr4	4428616	4429016
chr4	4429001	4429401
chr4	4430513	4430913
chr4	4431142	4431542
chr4	4447893	4448293
chr4	4471892	4472292
chr4	4602894	4603294
chr4	5758697	5759097
chr4	5869582	5869982
chr4	6748211	6748611
chr4	6760860	6761260
chr4	6781329	6781729
chr4	7315368	7315768
chr4	7319332	7319732
chr4	7358912	7359312
chr4	7473989	7474389
chr4	7474557	7474957
chr4	7475092	7475492
chr4	7739390	7739790
chr4	7788437	7788837
chr4	8117231	8117631
chr4	8125724	8126124
chr4	8126054	8126454
chr4	8683211	8683611
chr4	8840149	8840549
chr4	9820432	9820832
chr4	9834578	9834978
chr4	9838699	9839099
chr4	10565972	10566372
chr4	10585708	10586108
chr4	10600936	10601336
chr4	10619859	10620259
chr4	10624514	10624914
chr4	10647109	10647509
chr4	10649195	10649595
chr4	10662960	10663360
chr4	11011367	11011767
chr4	11055067	11055467
chr4	11129975	11130375
chr4	11209767	11210167
chr4	11210147	11210547
chr4	11782062	11782462
chr4	11952765	11953165
chr4	12515025	12515425
chr4	12669683	12670083
chr4	12887529	12887929
chr4	12975688	12976088
chr4	13225832	13226232
chr4	13239048	13239448
chr4	13273719	13274119
chr4	13438988	13439388
chr4	13456741	13457141
chr4	13468424	13468824
chr4	13554044	13554444
chr4	13578446	13578846
chr4	13678252	13678652
chr4	14082939	14083339
chr4	14237960	14238360
chr4	15200928	15201328
chr4	15558035	15558435
chr4	15624372	15624772
chr4	15634778	15635178
chr4	15648448	15648848
chr4	15655304	15655704
chr4	15668467	15668867
chr4	15669062	15669462
chr4	15956149	15956549
chr4	16131956	16132356
chr4	17109027	17109427
chr4	17343661	17344061
chr4	17608341	17608741
chr4	17623287	17623687
chr4	17911998	17912398
chr4	19040631	19041031
chr4	19096930	19097330
chr4	19188745	19189145
chr4	19189205	19189605
chr4	19190481	19190881
chr4	19734356	19734756
chr4	19750735	19751135
chr4	19767838	19768238
chr4	20307057	20307457
chr4	20395422	20395822
chr4	20406595	20406995
chr4	20504821	20505221
chr4	20511144	20511544
chr4	20513672	20514072
chr4	20554935	20555335
chr4	20817557	20817957
chr4	20958510	20958910
chr4	21434143	21434543
chr4	21443708	21444108
chr4	21466976	21467376
chr4	21495354	21495754
chr4	21714616	21715016
chr4	21921619	21922019
chr4	22789490	22789890
chr4	22854357	22854757
chr4	23358851	23359251
chr4	23546707	23547107
chr4	23939447	23939847
chr4	23942997	23943397
chr4	24136697	24137097
chr4	24860684	24861084
chr4	24868034	24868434
chr4	26565570	26565970
chr4	27170625	27171025
chr4	27674517	27674917
chr4	27806099	27806499
chr4	28428660	28429060
chr4	29554268	29554668
chr4	29611634	29612034
chr4	30010521	30010921
chr4	30192036	30192436
chr4	30479507	30479907
chr4	31163420	31163820
chr4	31164486	31164886
chr4	31730882	31731282
chr4	31946534	31946934
chr4	32848504	32848904
chr4	33163088	33163488
chr4	33174836	33175236
chr4	34296779	34297179
chr4	35379582	35379982
chr4	36015113	36015513
chr4	37446963	37447363
chr4	38655168	38655568
chr4	38749177	38749577
chr4	39032235	39032635
chr4	39378491	39378891
chr4	40284721	40285121
chr4	40916712	40917112
chr4	41370849	41371249
chr4	42579154	42579554
chr4	42680159	42680559
chr4	43031112	43031512
chr4	43692051	43692451
chr4	43849483	43849883
chr4	44475761	44476161
chr4	45075305	45075705
chr4	45502988	45503388
chr4	45519150	45519550
chr4	46980493	46980893
chr4	49363935	49364335
chr4	50409508	50409908
chr4	50434199	50434599
chr4	50961465	50961865
chr4	51008303	51008703
chr4	51105016	51105416
chr4	51346213	51346613
chr4	52611850	52612250
chr4	53021599	53021999
chr4	54660856	54661256
chr4	54904472	54904872
chr4	55111246	55111646
chr4	55112194	55112594
chr4	61278146	61278546
chr4	61788516	61788916
chr4	62025560	62025960
chr4	62034139	62034539
chr4	62058493	62058893
chr4	62060945	62061345
chr4	62078664	62079064
chr4	62089322	62089722
chr5	4849354	4849754
chr5	32374697	32375097
chr5	194257	194657
chr5	840908	841308
chr5	1802256	1802656
chr5	1805237	1805637
chr5	2767208	2767608
chr5	3155586	3155986
chr5	4064286	4064686
chr5	4109626	4110026
chr5	4998933	4999333
chr5	5055353	5055753
chr5	5056378	5056778
chr5	6736274	6736674
chr5	6846458	6846858
chr5	7118415	7118815
chr5	8726552	8726952
chr5	10789251	10789651
chr5	11429068	11429468
chr5	12897581	12897981
chr5	13325380	13325780
chr5	13785334	13785734
chr5	13785633	13786033
chr5	14682149	14682549
chr5	14720241	14720641
chr5	14720595	14720995
chr5	14909290	14909690
chr5	14945681	14946081
chr5	14974690	14975090
chr5	16030239	16030639
chr5	16045772	16046172
chr5	17171460	17171860
chr5	17464979	17465379
chr5	17732102	17732502
chr5	17792060	17792460
chr5	17793817	17794217
chr5	18088835	18089235
chr5	18137522	18137922
chr5	18824279	18824679
chr5	18986462	18986862
chr5	19044771	19045171
chr5	19546931	19547331
chr5	19547398	19547798
chr5	20786879	20787279
chr5	20833720	20834120
chr5	21717056	21717456
chr5	22111540	22111940
chr5	22143619	22144019
chr5	23857623	23858023
chr5	23861273	23861673
chr5	24018167	24018567
chr5	24176005	24176405
chr5	24901732	24902132
chr5	24921021	24921421
chr5	24925746	24926146
chr5	25358743	25359143
chr5	25362791	25363191
chr5	25363081	25363481
chr5	25474128	25474528
chr5	25476571	25476971
chr5	26096223	26096623
chr5	26145348	26145748
chr5	26419552	26419952
chr5	26492513	26492913
chr5	26495927	26496327
chr5	26519010	26519410
chr5	26521716	26522116
chr5	26542113	26542513
chr5	27320096	27320496
chr5	27320324	27320724
chr5	27320624	27321024
chr5	27322750	27323150
chr5	27386915	27387315
chr5	27784805	27785205
chr5	27860913	27861313
chr5	27862084	27862484
chr5	27862563	27862963
chr5	29048242	29048642
chr5	29495418	29495818
chr5	29500344	29500744
chr5	29541099	29541499
chr5	29567284	29567684
chr5	29571931	29572331
chr5	30698576	30698976
chr5	31739343	31739743
chr5	32241339	32241739
chr5	32354706	32355106
chr5	32358467	32358867
chr5	32375187	32375587
chr5	32378245	32378645
chr5	32381055	32381455
chr5	32575971	32576371
chr5	32588596	32588996
chr5	32668245	32668645
chr5	32804826	32805226
chr5	32823768	32824168
chr5	34397613	34398013
chr5	34416633	34417033
chr5	36169394	36169794
chr5	36647343	36647743
chr5	37356736	37357136
chr5	37356954	37357354
chr5	37915088	37915488
chr5	38202191	38202591
chr5	38255425	38255825
chr5	38451015	38451415
chr5	38698655	38699055
chr5	38846131	38846531
chr5	39256115	39256515
chr5	39273059	39273459
chr5	39557979	39558379
chr5	39939527	39939927
chr5	40017557	40017957
chr5	40683359	40683759
chr5	40733576	40733976
chr5	41266494	41266894
chr5	41321217	41321617
chr5	41640233	41640633
chr5	41664684	41665084
chr5	42488795	42489195
chr5	42490003	42490403
chr5	42726726	42727126
chr5	42879860	42880260
chr5	42947914	42948314
chr5	42972139	42972539
chr5	42999353	42999753
chr5	43013622	43014022
chr5	43680681	43681081
chr5	43709739	43710139
chr5	43853343	43853743
chr5	43861255	43861655
chr5	43895971	43896371
chr5	44583172	44583572
chr5	44617655	44618055
chr5	44631434	44631834
chr5	45054541	45054941
chr5	45156767	45157167
chr5	45529421	45529821
chr5	45571362	45571762
chr5	45904831	45905231
chr5	45905210	45905610
chr5	46325387	46325787
chr5	46327785	46328185
chr5	47497839	47498239
chr5	47498105	47498505
chr5	47890149	47890549
chr5	47909162	47909562
chr5	49708877	49709277
chr5	50273355	50273755
chr5	50274019	50274419
chr5	50655902	50656302
chr5	50658786	50659186
chr5	50677980	50678380
chr5	50682711	50683111
chr5	50692147	50692547
chr5	51035435	51035835
chr5	51882166	51882566
chr5	52602052	52602452
chr5	52603313	52603713
chr5	52608953	52609353
chr5	52639161	52639561
chr5	52735111	52735511
chr5	52743896	52744296
chr5	55148020	55148420
chr5	56560466	56560866
chr5	57776658	57777058
chr5	57776989	57777389
chr5	57824663	57825063
chr5	58007801	58008201
chr5	58558365	58558765
chr5	58558675	58559075
chr5	58916457	58916857
chr5	58922190	58922590
chr5	58925709	58926109
chr5	58948843	58949243
chr5	59005114	59005514
chr5	59006249	59006649
chr5	59013450	59013850
chr5	59093566	59093966
chr5	59576298	59576698
chr5	60026274	60026674
chr5	60508844	60509244
chr5	61002129	61002529
chr5	62566825	62567225
chr5	63022899	63023299
chr5	63046276	63046676
chr5	65020788	65021188
chr5	65128137	65128537
chr5	66495466	66495866
chr5	66495977	66496377
chr5	66590342	66590742
chr5	67484607	67485007
chr5	67536024	67536424
chr5	67537595	67537995
chr5	67541193	67541593
chr5	69300096	69300496
chr5	69422850	69423250
chr5	70744603	70745003
chr5	71346479	71346879
chr5	72269861	72270261
chr5	72270217	72270617
chr5	75414981	75415381
chr6	22813	23213
chr6	60847	61247
chr6	61465	61865
chr6	65929	66329
chr6	218202	218602
chr6	1374309	1374709
chr6	1413983	1414383
chr6	1550585	1550985
chr6	2134164	2134564
chr6	3846181	3846581
chr6	4093435	4093835
chr6	4293951	4294351
chr6	6156800	6157200
chr6	6706096	6706496
chr6	6929764	6930164
chr6	6944145	6944545
chr6	7222065	7222465
chr6	7380909	7381309
chr6	7382815	7383215
chr6	7401091	7401491
chr6	7424267	7424667
chr6	7491938	7492338
chr6	7492372	7492772
chr6	7619249	7619649
chr6	7688416	7688816
chr6	7692730	7693130
chr6	7699525	7699925
chr6	9077201	9077601
chr6	9077714	9078114
chr6	9551351	9551751
chr6	9559397	9559797
chr6	9561668	9562068
chr6	9566155	9566555
chr6	10823776	10824176
chr6	10824299	10824699
chr6	10999896	11000296
chr6	11209816	11210216
chr6	12824589	12824989
chr6	12933899	12934299
chr6	13695662	13696062
chr6	13758219	13758619
chr6	13926903	13927303
chr6	16166317	16166717
chr6	16191401	16191801
chr6	16294475	16294875
chr6	18048760	18049160
chr6	19400612	19401012
chr6	20007266	20007666
chr6	20074425	20074825
chr6	20084344	20084744
chr6	20388370	20388770
chr6	21315621	21316021
chr6	21481896	21482296
chr6	21622057	21622457
chr6	21622852	21623252
chr6	21641389	21641789
chr6	21642895	21643295
chr6	23831738	23832138
chr6	26265100	26265500
chr6	26772521	26772921
chr6	27169674	27170074
chr6	27275795	27276195
chr6	27659470	27659870
chr6	27703756	27704156
chr6	27934337	27934737
chr6	27954515	27954915
chr6	28382272	28382672
chr6	28671525	28671925
chr6	28799100	28799500
chr6	28969699	28970099
chr6	29452461	29452861
chr6	29459909	29460309
chr6	29462000	29462400
chr6	30360037	30360437
chr6	30360270	30360670
chr6	30360481	30360881
chr6	30646178	30646578
chr6	30649861	30650261
chr6	30651064	30651464
chr6	30655290	30655690
chr6	30659339	30659739
chr6	30933153	30933553
chr6	32860974	32861374
chr6	33226242	33226642
chr6	33245978	33246378
chr6	33289708	33290108
chr6	33517741	33518141
chr6	33535473	33535873
chr6	34573270	34573670
chr6	34701922	34702322
chr6	34978942	34979342
chr6	35171912	35172312
chr6	35692939	35693339
chr6	36411824	36412224
chr6	36788516	36788916
chr6	37209273	37209673
chr6	37611518	37611918
chr6	37998569	37998969
chr6	38729280	38729680
chr6	39030324	39030724
chr6	39070569	39070969
chr6	39247314	39247714
chr6	39247885	39248285
chr6	39258021	39258421
chr6	39258610	39259010
chr6	39264999	39265399
chr6	39283375	39283775
chr6	39293401	39293801
chr6	40010004	40010404
chr6	40016423	40016823
chr6	40027511	40027911
chr6	40409542	40409942
chr6	40587409	40587809
chr6	40588342	40588742
chr6	41052730	41053130
chr6	41138777	41139177
chr6	41500803	41501203
chr6	41503089	41503489
chr6	42406605	42407005
chr6	42406936	42407336
chr6	43183014	43183414
chr6	43202295	43202695
chr6	43207085	43207485
chr6	44003005	44003405
chr6	44349620	44350020
chr6	45835141	45835541
chr6	46513034	46513434
chr6	46513334	46513734
chr6	47692968	47693368
chr6	47702038	47702438
chr6	47867799	47868199
chr6	48026186	48026586
chr6	49002638	49003038
chr6	49003513	49003913
chr6	49011600	49012000
chr6	49434195	49434595
chr6	49449252	49449652
chr6	49479569	49479969
chr6	49757829	49758229
chr6	49804594	49804994
chr6	50348845	50349245
chr6	50450536	50450936
chr6	50603480	50603880
chr6	51552559	51552959
chr6	52439274	52439674
chr6	52457759	52458159
chr6	52460024	52460424
chr6	52606434	52606834
chr6	52637341	52637741
chr6	52665629	52666029
chr6	52975668	52976068
chr6	54229472	54229872
chr6	54534785	54535185
chr6	54582569	54582969
chr6	54592259	54592659
chr6	54662895	54663295
chr6	54687683	54688083
chr6	54705605	54706005
chr6	54783862	54784262
chr6	55664791	55665191
chr6	56110832	56111232
chr6	56154470	56154870
chr6	56180614	56181014
chr6	56294629	56295029
chr6	56295611	56296011
chr6	57588894	57589294
chr6	57665003	57665403
chr6	59450289	59450689
chr7	946985	947385
chr7	1005316	1005716
chr7	1547234	1547634
chr7	1651615	1652015
chr7	2658058	2658458
chr7	2658372	2658772
chr7	2663270	2663670
chr7	2675699	2676099
chr7	2695851	2696251
chr7	2725464	2725864
chr7	2772903	2773303
chr7	2775329	2775729
chr7	2790510	2790910
chr7	2790766	2791166
chr7	4237394	4237794
chr7	5278230	5278630
chr7	5291730	5292130
chr7	5563160	5563560
chr7	6703635	6704035
chr7	6797147	6797547
chr7	7069553	7069953
chr7	7070309	7070709
chr7	7196197	7196597
chr7	7455716	7456116
chr7	7616132	7616532
chr7	8379240	8379640
chr7	9195191	9195591
chr7	9220418	9220818
chr7	9221096	9221496
chr7	9763605	9764005
chr7	10266288	10266688
chr7	12336868	12337268
chr7	14872073	14872473
chr7	14873853	14874253
chr7	16989370	16989770
chr7	17278147	17278547
chr7	18784633	18785033
chr7	19207405	19207805
chr7	19239221	19239621
chr7	19264370	19264770
chr7	19914188	19914588
chr7	19945224	19945624
chr7	20970299	20970699
chr7	20972008	20972408
chr7	20972237	20972637
chr7	20989553	20989953
chr7	20990074	20990474
chr7	20995183	20995583
chr7	20998285	20998685
chr7	21261234	21261634
chr7	21263757	21264157
chr7	21363552	21363952
chr7	21615217	21615617
chr7	21659618	21660018
chr7	21840583	21840983
chr7	21840929	21841329
chr7	22906516	22906916
chr7	22910237	22910637
chr7	22924057	22924457
chr7	22924493	22924893
chr7	22925247	22925647
chr7	22925548	22925948
chr7	22928327	22928727
chr7	23823412	23823812
chr7	23826276	23826676
chr7	24026253	24026653
chr7	24083034	24083434
chr7	24115574	24115974
chr7	24744611	24745011
chr7	24826966	24827366
chr7	24861455	24861855
chr7	25949159	25949559
chr7	26056801	26057201
chr7	26057460	26057860
chr7	26071452	26071852
chr7	26911397	26911797
chr7	26920421	26920821
chr7	27162765	27163165
chr7	27670486	27670886
chr7	27671149	27671549
chr7	27701942	27702342
chr7	27726167	27726567
chr7	28039428	28039828
chr7	29883591	29883991
chr7	30163318	30163718
chr7	30942427	30942827
chr7	31568539	31568939
chr7	31807113	31807513
chr7	31807339	31807739
chr7	31927548	31927948
chr7	32048868	32049268
chr7	32055146	32055546
chr7	32058039	32058439
chr7	32081667	32082067
chr7	32409051	32409451
chr7	32410713	32411113
chr7	33797530	33797930
chr7	33825875	33826275
chr7	33827582	33827982
chr7	33827866	33828266
chr7	33860736	33861136
chr7	34235968	34236368
chr7	34804163	34804563
chr7	35029976	35030376
chr7	35247319	35247719
chr7	35446008	35446408
chr7	35480580	35480980
chr7	35510386	35510786
chr7	35557875	35558275
chr7	35608901	35609301
chr7	35875745	35876145
chr7	36002843	36003243
chr7	36004286	36004686
chr7	36017175	36017575
chr7	36250884	36251284
chr7	36255586	36255986
chr7	36255902	36256302
chr7	36256605	36257005
chr7	36804737	36805137
chr7	36910286	36910686
chr7	37822831	37823231
chr7	38651583	38651983
chr7	39170410	39170810
chr7	39172956	39173356
chr7	39272436	39272836
chr7	39283726	39284126
chr7	39394420	39394820
chr7	39408342	39408742
chr7	39542865	39543265
chr7	39751913	39752313
chr7	39752414	39752814
chr7	39758720	39759120
chr7	40184546	40184946
chr7	40296974	40297374
chr7	41956533	41956933
chr7	41966517	41966917
chr7	43118120	43118520
chr7	43897942	43898342
chr7	44192362	44192762
chr7	44626790	44627190
chr7	45581571	45581971
chr7	45681721	45682121
chr7	45682487	45682887
chr7	47087384	47087784
chr7	47583220	47583620
chr7	47583675	47584075
chr7	50045674	50046074
chr7	50174712	50175112
chr7	50333469	50333869
chr7	51094135	51094535
chr7	51120870	51121270
chr7	51121768	51122168
chr7	51125180	51125580
chr7	51198795	51199195
chr7	51257191	51257591
chr7	51356021	51356421
chr7	51357025	51357425
chr7	51964284	51964684
chr7	52070682	52071082
chr7	52185723	52186123
chr7	53872070	53872470
chr7	53872757	53873157
chr7	53878005	53878405
chr7	53880891	53881291
chr7	54682373	54682773
chr7	54778738	54779138
chr7	54799962	54800362
chr7	54907913	54908313
chr7	55971620	55972020
chr7	56191256	56191656
chr7	56192066	56192466
chr7	56206150	56206550
chr7	56686205	56686605
chr7	56714989	56715389
chr7	56737675	56738075
chr7	56860377	56860777
chr7	56935292	56935692
chr7	57638689	57639089
chr7	57651283	57651683
chr7	57939521	57939921
chr7	57943232	57943632
chr7	57968856	57969256
chr7	58189608	58190008
chr7	58351141	58351541
chr7	58352274	58352674
chr7	58988886	58989286
chr7	58991349	58991749
chr7	59285995	59286395
chr7	60274373	60274773
chr7	60578154	60578554
chr7	60796472	60796872
chr7	60852558	60852958
chr7	61025062	61025462
chr7	62908090	62908490
chr7	62918509	62918909
chr7	65760073	65760473
chr7	65890711	65891111
chr7	66506538	66506938
chr7	66518787	66519187
chr7	66704423	66704823
chr7	66722239	66722639
chr7	67916529	67916929
chr7	68543914	68544314
chr7	68587118	68587518
chr7	68781254	68781654
chr7	69786007	69786407
chr7	70415450	70415850
chr7	72063201	72063601
chr7	72516086	72516486
chr7	72523238	72523638
chr7	72525385	72525785
chr7	72525640	72526040
chr7	74695848	74696248
chr7	74834533	74834933
chr7	75210284	75210684
chr7	76217521	76217921
chr7	76486454	76486854
chr7	76672211	76672611
chr7	76682808	76683208
chr7	77021405	77021805
chr7	77027895	77028295
chr8	501957	502357
chr8	1119456	1119856
chr8	1225961	1226361
chr8	2162850	2163250
chr8	2958354	2958754
chr8	3510716	3511116
chr8	3517001	3517401
chr8	3685627	3686027
chr8	4690730	4691130
chr8	4711241	4711641
chr8	5825934	5826334
chr8	7139561	7139961
chr8	7369040	7369440
chr8	7651688	7652088
chr8	7662968	7663368
chr8	8676814	8677214
chr8	8725384	8725784
chr8	9420697	9421097
chr8	9427224	9427624
chr8	9438124	9438524
chr8	9444768	9445168
chr8	9459544	9459944
chr8	9478154	9478554
chr8	9480144	9480544
chr8	9494689	9495089
chr8	9518751	9519151
chr8	10188603	10189003
chr8	10762935	10763335
chr8	10773049	10773449
chr8	10942912	10943312
chr8	10943277	10943677
chr8	11266646	11267046
chr8	11453242	11453642
chr8	11453725	11454125
chr8	11510518	11510918
chr8	11710827	11711227
chr8	12182074	12182474
chr8	12230477	12230877
chr8	12818125	12818525
chr8	12949483	12949883
chr8	13544421	13544821
chr8	13545957	13546357
chr8	14057790	14058190
chr8	14608149	14608549
chr8	15510166	15510566
chr8	15620139	15620539
chr8	15623880	15624280
chr8	15625752	15626152
chr8	16823306	16823706
chr8	16938850	16939250
chr8	16944503	16944903
chr8	16964813	16965213
chr8	16967907	16968307
chr8	16973449	16973849
chr8	17014800	17015200
chr8	17033367	17033767
chr8	17034308	17034708
chr8	17185922	17186322
chr8	17263287	17263687
chr8	17265206	17265606
chr8	17275324	17275724
chr8	17517887	17518287
chr8	17613272	17613672
chr8	17952442	17952842
chr8	17980336	17980736
chr8	18030352	18030752
chr8	19576534	19576934
chr8	20096246	20096646
chr8	20112697	20113097
chr8	20411762	20412162
chr8	20638016	20638416
chr8	20694937	20695337
chr8	20705630	20706030
chr8	20707515	20707915
chr8	20886904	20887304
chr8	21261357	21261757
chr8	21311440	21311840
chr8	21632161	21632561
chr8	22902563	22902963
chr8	22903043	22903443
chr8	23148624	23149024
chr8	23360872	23361272
chr8	23689776	23690176
chr8	24005134	24005534
chr8	24052296	24052696
chr8	24067500	24067900
chr8	24110886	24111286
chr8	24460340	24460740
chr8	24543204	24543604
chr8	24721380	24721780
chr8	24988849	24989249
chr8	25114302	25114702
chr8	25671925	25672325
chr8	25915347	25915747
chr8	25925791	25926191
chr8	25926037	25926437
chr8	26463657	26464057
chr8	26465923	26466323
chr8	26701051	26701451
chr8	27140165	27140565
chr8	27144590	27144990
chr8	27208205	27208605
chr8	27482561	27482961
chr8	27628526	27628926
chr8	27808181	27808581
chr8	29239634	29240034
chr8	29259363	29259763
chr8	29572649	29573049
chr8	31355648	31356048
chr8	31363919	31364319
chr8	31411562	31411962
chr8	31519950	31520350
chr8	31575783	31576183
chr8	31804228	31804628
chr8	31936860	31937260
chr8	31968435	31968835
chr8	33609576	33609976
chr8	33653929	33654329
chr8	33672253	33672653
chr8	33673444	33673844
chr8	35800852	35801252
chr8	35812548	35812948
chr8	38032677	38033077
chr8	38118920	38119320
chr8	38119387	38119787
chr8	38194605	38195005
chr8	38602283	38602683
chr8	39100789	39101189
chr8	39166907	39167307
chr8	39206350	39206750
chr8	39289457	39289857
chr8	40479389	40479789
chr8	40479914	40480314
chr8	40498657	40499057
chr8	42714873	42715273
chr8	43306019	43306419
chr8	45333955	45334355
chr8	45549680	45550080
chr8	45550064	45550464
chr8	45553183	45553583
chr8	45553573	45553973
chr8	45601451	45601851
chr8	45620156	45620556
chr8	45698413	45698813
chr8	45833690	45834090
chr8	45848639	45849039
chr8	48122271	48122671
chr8	48556158	48556558
chr8	49344066	49344466
chr8	49944860	49945260
chr8	51476659	51477059
chr8	51824999	51825399
chr8	51850499	51850899
chr8	52122567	52122967
chr8	52311456	52311856
chr8	52595340	52595740
chr8	52715488	52715888
chr8	53008049	53008449
chr8	53076015	53076415
chr8	54119283	54119683
chr8	54355300	54355700
chr8	54534194	54534594
chr8	55121487	55121887
chr8	55170479	55170879
chr8	55212744	55213144
chr8	55221292	55221692
chr8	55221670	55222070
chr8	55424868	55425268
chr8	56135581	56135981
chr8	56138717	56139117
chr8	56143689	56144089
chr8	56144066	56144466
chr9	16053	16453
chr9	492687	493087
chr9	646383	646783
chr9	662587	662987
chr9	680480	680880
chr9	986802	987202
chr9	992685	993085
chr9	1675902	1676302
chr9	2622215	2622615
chr9	4367655	4368055
chr9	5263948	5264348
chr9	8665578	8665978
chr9	9160254	9160654
chr9	9419326	9419726
chr9	9449356	9449756
chr9	9688397	9688797
chr9	9693798	9694198
chr9	9968548	9968948
chr9	10954067	10954467
chr9	11558576	11558976
chr9	11732104	11732504
chr9	13360022	13360422
chr9	13685372	13685772
chr9	14238189	14238589
chr9	14821711	14822111
chr9	15239544	15239944
chr9	15672396	15672796
chr9	15703372	15703772
chr9	15709156	15709556
chr9	15737824	15738224
chr9	16681743	16682143
chr9	17825002	17825402
chr9	18103564	18103964
chr9	18128473	18128873
chr9	18263814	18264214
chr9	18266144	18266544
chr9	18539528	18539928
chr9	19409373	19409773
chr9	19445550	19445950
chr9	19987673	19988073
chr9	20567629	20568029
chr9	21810352	21810752
chr9	21817721	21818121
chr9	21818326	21818726
chr9	22271011	22271411
chr9	22277168	22277568
chr9	22306451	22306851
chr9	22327607	22328007
chr9	22425104	22425504
chr9	22453086	22453486
chr9	22520079	22520479
chr9	22979986	22980386
chr9	22980717	22981117
chr9	22984006	22984406
chr9	22985183	22985583
chr9	23426151	23426551
chr9	24109744	24110144
chr9	24361020	24361420
chr9	24406738	24407138
chr9	24825461	24825861
chr9	25111427	25111827
chr9	25163423	25163823
chr9	25180349	25180749
chr9	25262251	25262651
chr9	25272917	25273317
chr9	25377830	25378230
chr9	26454357	26454757
chr9	26459265	26459665
chr9	26721486	26721886
chr9	26784886	26785286
chr9	27129970	27130370
chr9	27168006	27168406
chr9	29162037	29162437
chr9	29900391	29900791
chr9	29926411	29926811
chr9	29933361	29933761
chr9	30005465	30005865
chr9	31146860	31147260
chr9	31269335	31269735
chr9	31300432	31300832
chr9	31300797	31301197
chr9	31396963	31397363
chr9	31609028	31609428
chr9	31899080	31899480
chr9	32357924	32358324
chr9	32376354	32376754
chr9	32863417	32863817
chr9	33893122	33893522
chr9	33958291	33958691
chr9	34032696	34033096
chr9	34083328	34083728
chr9	34330704	34331104
chr9	34838563	34838963
chr9	34913643	34914043
chr9	35404179	35404579
chr9	38028576	38028976
chr9	39241469	39241869
chr9	39510545	39510945
chr9	39510759	39511159
chr9	39724044	39724444
chr9	40809593	40809993
chr9	40818434	40818834
chr9	40836919	40837319
chr9	40965814	40966214
chr9	40988649	40989049
chr9	41024146	41024546
chr9	41038571	41038971
chr9	41050335	41050735
chr9	41050685	41051085
chr9	41067669	41068069
chr9	41087320	41087720
chr9	41087614	41088014
chr9	41771832	41772232
chr9	41862528	41862928
chr9	41919343	41919743
chr9	41923618	41924018
chr9	42308583	42308983
chr9	42414605	42415005
chr9	42568271	42568671
chr9	42568878	42569278
chr9	43368833	43369233
chr9	44975772	44976172
chr9	45072797	45073197
chr9	45137365	45137765
chr9	45420508	45420908
chr9	45432777	45433177
chr9	45435723	45436123
chr9	46613393	46613793
chr9	46661913	46662313
chr9	46669287	46669687
chr9	47143730	47144130
chr9	47282633	47283033
chr9	47284197	47284597
chr9	47487595	47487995
chr9	47660546	47660946
chr9	47660825	47661225
chr9	47972666	47973066
chr9	48868867	48869267
chr9	48973686	48974086
chr9	50453532	50453932
chr9	52571823	52572223
chr9	52918018	52918418
chr9	53733577	53733977
chr9	55191249	55191649
chr10	101825	102225
chr10	117515	117915
chr10	232909	233309
chr10	265250	265650
chr10	285240	285640
chr10	1273077	1273477
chr10	1822453	1822853
chr10	1824270	1824670
chr10	2652322	2652722
chr10	2652619	2653019
chr10	2655847	2656247
chr10	2746109	2746509
chr10	2961442	2961842
chr10	3157913	3158313
chr10	3209299	3209699
chr10	3211975	3212375
chr10	3297162	3297562
chr10	3299649	3300049
chr10	4556466	4556866
chr10	4927529	4927929
chr10	5243835	5244235
chr10	5920274	5920674
chr10	5984141	5984541
chr10	6935469	6935869
chr10	7002515	7002915
chr10	7292147	7292547
chr10	7939858	7940258
chr10	8141316	8141716
chr10	8141809	8142209
chr10	8693480	8693880
chr10	8744172	8744572
chr10	9939315	9939715
chr10	9981551	9981951
chr10	10349805	10350205
chr10	10716957	10717357
chr10	10785903	10786303
chr10	10786392	10786792
chr10	10788772	10789172
chr10	10894597	10894997
chr10	10895030	10895430
chr10	10895379	10895779
chr10	11159688	11160088
chr10	11227766	11228166
chr10	11317502	11317902
chr10	13169336	13169736
chr10	13174304	13174704
chr10	13340147	13340547
chr10	13341722	13342122
chr10	15075728	15076128
chr10	15077184	15077584
chr10	15082005	15082405
chr10	15085660	15086060
chr10	15213019	15213419
chr10	15520332	15520732
chr10	15520693	15521093
chr10	15529701	15530101
chr10	15627985	15628385
chr10	16951047	16951447
chr10	17058600	17059000
chr10	17773175	17773575
chr10	17986382	17986782
chr10	18230941	18231341
chr10	19298405	19298805
chr10	20224310	20224710
chr10	20555526	20555926
chr10	20565715	20566115
chr10	20604896	20605296
chr10	20617174	20617574
chr10	21347733	21348133
chr10	21442734	21443134
chr10	22347924	22348324
chr10	22348250	22348650
chr10	22353246	22353646
chr10	22735889	22736289
chr10	24353537	24353937
chr10	25171784	25172184
chr10	26002861	26003261
chr10	26227372	26227772
chr10	26287462	26287862
chr10	26753006	26753406
chr10	26988097	26988497
chr10	27294867	27295267
chr10	27302710	27303110
chr10	27768132	27768532
chr10	27784798	27785198
chr10	27872236	27872636
chr10	27979811	27980211
chr10	28735860	28736260
chr10	28762997	28763397
chr10	28766291	28766691
chr10	28779015	28779415
chr10	28948724	28949124
chr10	29043901	29044301
chr10	29044401	29044801
chr10	32260567	32260967
chr10	32760085	32760485
chr10	33081876	33082276
chr10	34011661	34012061
chr10	34206127	34206527
chr10	34206416	34206816
chr10	34351350	34351750
chr10	34641927	34642327
chr10	34907907	34908307
chr10	34908189	34908589
chr10	34908503	34908903
chr10	34969793	34970193
chr10	36003515	36003915
chr10	36145462	36145862
chr10	36166754	36167154
chr10	36170297	36170697
chr10	36400832	36401232
chr10	36445950	36446350
chr10	36496867	36497267
chr10	36505882	36506282
chr10	38126028	38126428
chr10	38386987	38387387
chr10	38407633	38408033
chr10	38567265	38567665
chr10	39585438	39585838
chr10	40603624	40604024
chr10	40691642	40692042
chr10	43722900	43723300
chr10	44402490	44402890
chr10	45637556	45637956
chr10	45637817	45638217
chr10	45717807	45718207
chr10	45719844	45720244
chr10	45720354	45720754
chr10	45891355	45891755
chr10	46172515	46172915
chr10	46182002	46182402
chr10	46348016	46348416
chr10	46574980	46575380
chr10	46575433	46575833
chr10	46577017	46577417
chr10	46577740	46578140
chr11	29608	30008
chr11	82078	82478
chr11	85419	85819
chr11	495997	496397
chr11	554559	554959
chr11	644059	644459
chr11	734614	735014
chr11	883941	884341
chr11	1846486	1846886
chr11	2307521	2307921
chr11	2307960	2308360
chr11	2316486	2316886
chr11	2411078	2411478
chr11	2695856	2696256
chr11	3833332	3833732
chr11	4012272	4012672
chr11	4094705	4095105
chr11	5256369	5256769
chr11	5486587	5486987
chr11	5779540	5779940
chr11	6128412	6128812
chr11	6151132	6151532
chr11	6226567	6226967
chr11	6537907	6538307
chr11	6569835	6570235
chr11	6573635	6574035
chr11	6589284	6589684
chr11	6706715	6707115
chr11	6707093	6707493
chr11	6724222	6724622
chr11	6784479	6784879
chr11	7116609	7117009
chr11	7123817	7124217
chr11	7173923	7174323
chr11	7725702	7726102
chr11	7725973	7726373
chr11	8723706	8724106
chr11	8737871	8738271
chr11	9577676	9578076
chr11	10606293	10606693
chr11	10620966	10621366
chr11	10861577	10861977
chr11	10862415	10862815
chr11	11106390	11106790
chr11	11239710	11240110
chr11	11339637	11340037
chr11	11698934	11699334
chr11	11863153	11863553
chr11	11868397	11868797
chr11	11871962	11872362
chr11	11947704	11948104
chr11	12018043	12018443
chr11	12043566	12043966
chr11	12281726	12282126
chr11	12282107	12282507
chr11	13720305	13720705
chr11	13751356	13751756
chr11	13779652	13780052
chr11	15783031	15783431
chr11	16677253	16677653
chr11	16849779	16850179
chr11	16866300	16866700
chr11	16889364	16889764
chr11	16952836	16953236
chr11	18309652	18310052
chr11	18463373	18463773
chr11	18578404	18578804
chr11	18643283	18643683
chr11	18646202	18646602
chr11	18814037	18814437
chr11	19026511	19026911
chr11	19079377	19079777
chr11	19137897	19138297
chr11	19146826	19147226
chr11	19202773	19203173
chr11	19220498	19220898
chr11	19236473	19236873
chr11	19238851	19239251
chr11	19292793	19293193
chr11	19315883	19316283
chr11	19316574	19316974
chr11	19321926	19322326
chr11	19329737	19330137
chr11	19330740	19331140
chr11	19331127	19331527
chr11	19462154	19462554
chr11	19462414	19462814
chr11	20114482	20114882
chr11	20294707	20295107
chr11	22013074	22013474
chr11	22050034	22050434
chr11	22057731	22058131
chr11	22096686	22097086
chr11	22098634	22099034
chr11	22107609	22108009
chr11	22776664	22777064
chr11	22923168	22923568
chr11	23972832	23973232
chr11	23987097	23987497
chr11	23987465	23987865
chr11	24014034	24014434
chr11	24337374	24337774
chr11	24338591	24338991
chr11	24388953	24389353
chr11	24577019	24577419
chr11	24965303	24965703
chr11	24976742	24977142
chr11	24991953	24992353
chr11	25957956	25958356
chr11	25968675	25969075
chr11	25970388	25970788
chr11	26179605	26180005
chr11	26307384	26307784
chr11	26389517	26389917
chr11	26862399	26862799
chr11	26864087	26864487
chr11	26864548	26864948
chr11	27260775	27261175
chr11	27578752	27579152
chr11	27578976	27579376
chr11	27686753	27687153
chr11	28477576	28477976
chr11	29367711	29368111
chr11	29371674	29372074
chr11	29502437	29502837
chr11	30465896	30466296
chr11	30641083	30641483
chr11	30821757	30822157
chr11	30912036	30912436
chr11	31510115	31510515
chr11	33244725	33245125
chr11	35207705	35208105
chr11	35463454	35463854
chr11	35476088	35476488
chr11	35476626	35477026
chr11	36233594	36233994
chr11	36572497	36572897
chr11	36603075	36603475
chr11	36621487	36621887
chr11	36662125	36662525
chr11	36861289	36861689
chr11	38129214	38129614
chr11	39071728	39072128
chr11	40567150	40567550
chr11	41604641	41605041
chr11	42234642	42235042
chr11	42258714	42259114
chr11	42275308	42275708
chr11	42308637	42309037
chr11	43231466	43231866
chr11	43368659	43369059
chr11	43397595	43397995
chr11	43471688	43472088
chr11	43924958	43925358
chr11	44252654	44253054
chr11	44483037	44483437
chr11	45221081	45221481
chr11	45232908	45233308
chr11	45513342	45513742
chr11	45516298	45516698
chr11	45520203	45520603
chr11	45525781	45526181
chr11	45526576	45526976
chr11	45542135	45542535
chr11	45544170	45544570
chr11	45567431	45567831
chr11	45578984	45579384
chr11	45605416	45605816
chr11	46098871	46099271
chr11	46237047	46237447
chr11	46254867	46255267
chr12	464340	464740
chr12	825227	825627
chr12	895222	895622
chr12	911350	911750
chr12	983087	983487
chr12	2188452	2188852
chr12	2198174	2198574
chr12	3639620	3640020
chr12	3739888	3740288
chr12	3980088	3980488
chr12	3980622	3981022
chr12	4929683	4930083
chr12	5120367	5120767
chr12	5589975	5590375
chr12	5591411	5591811
chr12	5751939	5752339
chr12	5885925	5886325
chr12	5886306	5886706
chr12	5929604	5930004
chr12	6560048	6560448
chr12	6604880	6605280
chr12	7877909	7878309
chr12	8193270	8193670
chr12	8633842	8634242
chr12	8901529	8901929
chr12	9425376	9425776
chr12	9465687	9466087
chr12	9482249	9482649
chr12	9482805	9483205
chr12	9524499	9524899
chr12	9524818	9525218
chr12	9607473	9607873
chr12	10237089	10237489
chr12	10770647	10771047
chr12	11141836	11142236
chr12	11554463	11554863
chr12	12419937	12420337
chr12	12949199	12949599
chr12	12968423	12968823
chr12	14245839	14246239
chr12	14734793	14735193
chr12	14849235	14849635
chr12	15209624	15210024
chr12	15225522	15225922
chr12	16087802	16088202
chr12	16415976	16416376
chr12	18160337	18160737
chr12	18202839	18203239
chr12	18203103	18203503
chr12	18230726	18231126
chr12	18231658	18232058
chr12	18237722	18238122
chr12	18326272	18326672
chr12	18487211	18487611
[truncated: 1,947 more rows]

## Sheet: 1g
chr9	14676202	14676702
chr10	17330907	17331407
chr2	17759235	17759735
chr5	12505687	12506187
chr1	180559142	180559642
chr10	102659618	102660118
chr1	132200619	132201119
chr16	15114827	15115327
chr10	13328525	13329025
chr18	11632862	11633362
chr3	121897820	121898320
chr14	105369631	105370131
chr5	12404221	12404721
chr13	72198488	72198988
chr7	96102594	96103094
chr19	9066075	9066575
chr10	21287521	21288021
chr4	22144900	22145400
chr4	29091440	29091940
chr12	40888206	40888706
chr9	9987462	9987962
chr2	55713068	55713568
chr4	128654434	128654934
chr2	62531026	62531526
chr16	76201119	76201619
chr1	106860848	106861348
chr18	57786239	57786739
chr3	134189989	134190489
chr19	20406412	20406912
chr6	114988113	114988613
chr1	16824698	16825198
chr1	10570874	10571374
chr3	54050207	54050707
chr4	109900978	109901478
chr14	110723992	110724492
chr15	91864050	91864550
chr11	88570866	88571366
chr13	38162632	38163132
chr6	56856722	56857222
chr10	101635264	101635764
chr14	92678759	92679259
chr17	56425165	56425665
chr1	12055814	12056314
chr13	17085112	17085612
chr2	116734397	116734897
chr14	22695891	22696391
chr4	35082310	35082810
chr10	110168065	110168565
chr1	67961172	67961672
chr9	9949148	9949648
chr10	69527220	69527720
chr4	29083083	29083583
chr14	99605402	99605902
chr5	63014602	63015102
chr12	92386152	92386652
chr5	58040039	58040539
chr2	109969859	109970359
chrX	167233046	167233546
chr4	65912337	65912837
chr3	108586498	108586998
chr16	56056867	56057367
chr2	41955807	41956307
chr11	16660412	16660912
chr18	46675842	46676342
chr1	40279282	40279782
chr2	48326829	48327329
chr12	89950066	89950566
chr1	153185923	153186423
chr7	102399185	102399685
chr13	26531949	26532449
chr17	47887679	47888179
chr6	127475125	127475625
chr3	159847534	159848034
chr1	69331585	69332085
chr15	56746964	56747464
chr17	40802988	40803488
chr9	75523637	75524137
chr6	147292075	147292575
chr5	128684338	128684838
chr18	7614237	7614737
chr7	72691784	72692284
chr9	32223995	32224495
chr15	38978263	38978763
chr2	97965150	97965650
chr9	73068063	73068563
chr13	92687104	92687604
chr11	8641573	8642073
chr9	102088511	102089011
chr3	121617331	121617831
chr17	90791837	90792337
chr7	112416486	112416986
chr6	76052917	76053417
chrX	133387641	133388141
chr15	23451975	23452475
chr7	115580460	115580960
chr8	90069319	90069819
chr8	32958047	32958547
chr2	79315020	79315520
chr12	65194093	65194593
chr17	14144233	14144733
chr10	115561211	115561711
chr11	22001492	22001992
chr10	69271235	69271735
chr3	55755058	55755558
chr3	10277285	10277785
chr11	19102947	19103447
chr5	91038608	91039108
chr8	5438987	5439487
chr2	68925522	68926022
chr4	123046229	123046729
chr11	91204422	91204922
chr6	51076942	51077442
chr2	17769148	17769648
chr13	7802637	7803137
chr3	69954061	69954561
chr15	27968120	27968620
chr16	53271869	53272369
chr6	101354101	101354601
chr6	112628361	112628861
chr13	38159073	38159573
chr15	63252891	63253391
chr4	89090193	89090693
chr15	25509875	25510375
chr18	8972797	8973297
chr19	53451279	53451779
chr10	64744122	64744622
chr2	107232777	107233277
chr7	19403870	19404370
chr10	67106953	67107453
chr3	57951171	57951671
chr15	55370693	55371193
chr16	55770329	55770829
chr1	165985990	165986490
chr12	28047872	28048372
chr14	123966456	123966956
chr3	117044280	117044780
chr3	37723983	37724483
chr13	114003434	114003934
chr3	143017461	143017961
chr6	37427999	37428499
chr12	35642359	35642859
chr15	57659950	57660450
chr2	19579716	19580216
chr6	121098528	121099028
chr12	65593514	65594014
chr3	69711838	69712338
chr13	63280300	63280800
chr18	5016711	5017211
chr5	91296896	91297396
chr18	50023752	50024252
chr12	56822100	56822600
chr14	99449039	99449539
chr3	37484016	37484516
chr9	97635272	97635772
chr4	151746250	151746750
chr13	38230381	38230881
chr2	110373167	110373667
chr3	34411560	34412060
chr12	79433745	79434245
chr1	34159908	34160408
chr13	52139269	52139769
chr9	14662816	14663316
chr15	37672179	37672679
chr6	148338313	148338813
chr1	161444788	161445288
chr10	39659857	39660357
chr3	58744424	58744924
chr3	81433452	81433952
chr18	69916015	69916515
chr4	123588880	123589380
chr1	150730203	150730703
chr8	32218829	32219329
chr16	47164288	47164788
chr5	13505771	13506271
chr4	156059623	156060123
chr18	65081774	65082274
chr1	107528628	107529128
chr2	102097403	102097903
chr4	7266669	7267169
chr18	43506346	43506846
chr8	46397439	46397939
chr2	85532168	85532668
chr3	52566427	52566927
chr1	9799829	9800329
chr1	12744708	12745208
chr7	89365134	89365634
chr15	30345687	30346187
chr6	6458882	6459382
chr1	21690431	21690931
chr1	69286297	69286797
chr2	48077122	48077622
chr14	108747120	108747620
chr14	53821752	53822252
chr18	65698307	65698807
chr4	81236156	81236656
chr15	11712727	11713227
chr3	92169792	92170292
chr4	64175902	64176402
chr1	144306203	144306703
chr3	49703059	49703559
chr1	21283755	21284255
chr12	95376441	95376941
chr9	99871672	99872172
chr4	81332742	81333242
chr2	143889868	143890368
chr14	118566282	118566782
chr18	54576481	54576981
chr1	72960122	72960622
chr13	90679591	90680091
chr8	43264671	43265171
chr10	13369554	13370054
chr14	99885103	99885603
chr4	72049607	72050107
chr7	70590376	70590876
chr18	61774413	61774913
chr5	17638498	17638998
chr10	51463690	51464190
chr4	30781534	30782034
chr3	34909253	34909753
chr6	70974483	70974983
chr10	126452364	126452864
chr17	79244359	79244859
chr10	115484537	115485037
chr16	29911185	29911685
chr15	37159322	37159822
chr5	12116923	12117423
chr14	103649990	103650490
chr4	98401154	98401654
chr6	77536971	77537471
chr17	62940646	62941146
chr2	72855543	72856043
chr2	46512621	46513121
chr15	62470300	62470800
chr16	88563238	88563738
chr14	105684976	105685476
chr17	67226868	67227368
chr8	35985271	35985771
chr10	9129343	9129843
chr12	50588354	50588854
chr8	4586265	4586765
chr14	118850566	118851066
chr13	38998874	38999374
chr17	4331647	4332147
chr4	87867404	87867904
chr14	103500831	103501331
chr10	11801658	11802158
chr9	104123870	104124370
chr12	119390008	119390508
chr1	138623983	138624483
chr1	108328610	108329110
chr10	37725515	37726015
chr8	21759352	21759852
chr3	59194078	59194578
chr18	20188186	20188686
chr4	68536151	68536651
chr9	30149697	30150197
chr6	30121475	30121975
chr15	38192933	38193433
chr2	137605839	137606339
chr17	14157635	14158135
chr19	26134620	26135120
chr12	57275453	57275953
chr9	94269178	94269678
chr4	72285199	72285699
chr3	58254586	58255086
chr1	193514278	193514778
chr12	118620898	118621398
chr13	115977343	115977843
chr6	49221816	49222316
chr8	113865608	113866108
chr10	7005132	7005632
chr2	122345525	122346025
chr16	72688307	72688807
chr8	10508948	10509448
chr6	7782775	7783275
chr12	51111710	51112210
chr10	128584153	128584653
chr7	89606076	89606576
chr1	19758017	19758517
chr14	105341711	105342211
chr8	8881626	8882126
chr18	6752229	6752729
chr13	95791394	95791894
chrX	11285828	11286328
chr13	96168971	96169471
chr19	21175323	21175823
chr11	67558749	67559249
chr3	60617523	60618023
chr3	144042657	144043157
chr12	118903539	118904039
chr1	172441904	172442404
chr4	9471366	9471866
chr12	97655596	97656096
chr13	91178410	91178910
chr2	136618173	136618673
chr10	94720277	94720777
chr16	93042778	93043278
chr9	38886677	38887177
chr18	4785392	4785892
chrX	20547518	20548018
chr2	22293759	22294259
chr7	29341758	29342258
chr1	69729200	69729700
chr10	51596856	51597356
chr7	50827233	50827733
chr6	6467576	6468076
chr7	118883817	118884317
chr9	86880277	86880777
chr15	55457730	55458230
chr5	122318881	122319381
chr13	25754766	25755266
chr14	99578953	99579453
chr2	21234778	21235278
chr3	92090996	92091496
chr17	71159124	71159624
chr15	86033877	86034377
chr16	90709654	90710154
chr14	79527667	79528167
chr6	134773866	134774366
chr9	103376455	103376955
chr17	67508223	67508723
chr13	107925482	107925982
chr1	135499044	135499544
chr8	35184466	35184966
chr18	49559042	49559542
chr1	45889116	45889616
chr6	144155000	144155500
chr14	117028152	117028652
chr8	103788227	103788727
chr14	118322437	118322937
chr10	88970948	88971448
chr11	16830445	16830945
chr16	64092363	64092863
chr17	81554213	81554713
chr10	49256168	49256668
chr17	78223916	78224416
chr10	112264162	112264662
chr6	3658929	3659429
chr18	51574625	51575125
chr2	115723479	115723979
chr3	92033776	92034276
chr13	14496972	14497472
chr13	3730224	3730724
chr5	72178810	72179310
chr15	5555678	5556178
chr8	8661043	8661543
chr1	193508167	193508667
chr19	32069560	32070060
chr12	14212902	14213402
chr5	16968704	16969204
chr4	20706484	20706984
chr3	101667140	101667640
chr4	132455027	132455527
chr19	55271234	55271734
chr8	17576063	17576563
chr9	95685674	95686174
chr14	22668372	22668872
chr5	97369403	97369903
chr10	19998685	19999185
chr13	5864029	5864529
chr2	109740964	109741464
chr3	120059928	120060428
chr4	96791238	96791738
chr18	27956470	27956970
chr13	71210765	71211265
chr6	51715411	51715911
chr1	172522419	172522919
chr13	90259313	90259813
chr17	42927253	42927753
chr3	109323389	109323889
chr1	19774458	19774958
chr2	4829601	4830101
chr11	8758722	8759222
chr2	13775103	13775603
chr5	32183265	32183765
chr3	80874046	80874546
chr15	87384222	87384722
chr15	53196108	53196608
chr3	9654639	9655139
chr4	95185290	95185790
chr12	36262264	36262764
chr14	119300052	119300552
chr1	76120778	76121278
chr6	84920857	84921357
chr3	82006893	82007393
chr13	28658623	28659123
chr12	3719196	3719696
chr3	81658398	81658898
chr14	16678388	16678888
chr13	9973807	9974307
chr6	22391106	22391606
chr18	45635668	45636168
chr15	70032146	70032646
chr3	24620426	24620926
chr13	93299383	93299883
chr14	20973772	20974272
chr1	12140208	12140708
chr6	94881112	94881612
chr4	5134064	5134564
chr3	50456482	50456982
chr6	37255941	37256441
chr15	28095129	28095629
chr15	27926855	27927355
chr7	88425692	88426192
chr10	32869485	32869985
chr10	26878869	26879369
chr1	94555821	94556321
chr3	9968273	9968773
chr1	171437204	171437704
chr11	89239813	89240313
chr13	38144937	38145437
chr3	85841715	85842215
chr5	3445039	3445539
chr3	37653941	37654441
chr18	30121493	30121993
chr5	98467109	98467609
chr3	75942372	75942872
chr10	53889485	53889985
chrX	110223283	110223783
chr16	49572764	49573264
chr2	141279172	141279672
chr15	53502307	53502807
chr16	57757236	57757736
chr11	34738907	34739407
chr9	26461027	26461527
chr1	15687861	15688361
chr11	59458939	59459439
chr13	16805530	16806030
chr16	97759599	97760099
chr18	42760093	42760593
chr5	4767799	4768299
chr1	181335710	181336210
chr1	46885229	46885729
chr13	21097378	21097878
chr13	7721431	7721931
chr3	144126791	144127291
chr14	11063416	11063916
chr4	95926645	95927145
chr13	6199035	6199535
chr3	144432105	144432605
chr2	117312691	117313191
chr1	162560039	162560539
chr2	4142455	4142955
chr14	101787774	101788274
chr7	50629104	50629604
chr18	42118353	42118853
chrX	86594797	86595297
chr1	172436822	172437322
chrX	166805476	166805976
chr11	6555436	6555936
chr2	80090233	80090733
chr1	3669476	3669976
chr3	93580912	93581412
chr6	15977851	15978351
chr14	29225897	29226397
chr7	129854789	129855289
chr13	55867524	55868024
chr15	37233190	37233690
chr15	53232128	53232628
chr14	98654390	98654890
chr13	63231473	63231973
chr16	74806796	74807296
chr1	9583838	9584338
chr4	63986528	63987028
chr5	36674580	36675080
chr17	74869502	74870002
chr1	15996107	15996607
chr9	76138349	76138849
chr14	73219429	73219929
chr2	112398661	112399161
chr3	102477582	102478082
chr14	51963619	51964119
chr10	17752453	17752953
chr3	30999514	31000014
chr2	146543806	146544306
chr17	78255644	78256144
chr4	120148564	120149064
chr10	122669959	122670459
chr14	72384870	72385370
chr9	13645118	13645618
chr18	55102027	55102527
chr8	125999859	126000359
chr12	36267919	36268419
chr2	136779771	136780271
chr5	87502621	87503121
chr6	5300599	5301099
chr13	114530121	114530621
chr15	54353718	54354218
chrX	100123358	100123858
chr2	52979087	52979587
chr3	79576081	79576581
chr12	17299852	17300352
chr16	94079860	94080360
chr4	141175643	141176143
chr19	17800730	17801230
chr13	91165923	91166423
chr17	42295592	42296092
chr4	89112567	89113067
chr10	18005354	18005854
chr7	113730637	113731137
chr17	90244833	90245333
chrX	17191144	17191644
chr3	154222188	154222688
chr3	58372297	58372797
chr14	61559912	61560412
chrX	153668256	153668756
chrX	80639472	80639972
chr8	31638015	31638515
chr13	13968707	13969207
chr1	79935844	79936344
chr3	137115543	137116043
chrX	50930087	50930587
chr1	13203653	13204153
chr1	68165833	68166333
chr4	14857152	14857652
chr12	95563330	95563830
chr5	86676273	86676773
chr2	9352146	9352646
chr13	110093943	110094443
chr15	94042709	94043209
chr7	73584178	73584678
chr15	42669069	42669569
chr15	61685634	61686134
chr11	8583374	8583874
chr10	4795872	4796372
chr7	72298910	72299410
chr16	72778424	72778924
chr11	19478839	19479339
chr5	3289840	3290340
chr10	115556799	115557299
chr6	41576476	41576976
chr4	20967740	20968240
chr16	73217566	73218066
chr2	45024403	45024903
chr3	8866125	8866625
chr8	57498760	57499260
chr11	5239710	5240210
chr12	99574142	99574642
chr9	6540259	6540759
chr4	76137498	76137998
chr5	39659330	39659830
chr7	124709002	124709502
chr5	59137949	59138449
chr3	94167282	94167782
chr6	126366040	126366540
chr14	99747093	99747593
chr6	146938902	146939402
chr2	6079815	6080315
chr12	89668916	89669416
chr5	5208091	5208591
chr7	138708286	138708786
chr2	13486485	13486985
chr2	102447789	102448289
chr5	12533688	12534188
chr5	100250395	100250895
chr8	3077444	3077944
chr17	70728905	70729405
chr1	156660181	156660681
chr14	76733225	76733725
chr18	54282231	54282731
chr4	89072185	89072685
chr2	102407492	102407992
chr6	76977759	76978259
chr13	48723477	48723977
chr2	75991369	75991869
chr1	66252133	66252633
chr14	120406108	120406608
chr1	183669536	183670036
chr2	124731345	124731845
chr4	109792231	109792731
chr11	24739822	24740322
chr7	66377014	66377514
chr8	126685396	126685896
chr5	60139164	60139664
chr14	111283634	111284134
chr6	71050849	71051349
chr13	13728130	13728630
chr5	62765982	62766482
chr13	116461664	116462164
chr8	44261050	44261550
chr15	61207396	61207896
chr12	33651163	33651663
chr16	74994825	74995325
chrX	140638041	140638541
chr16	30332107	30332607
chr12	103590767	103591267
chr5	28390059	28390559
chr3	81184798	81185298
chr5	86421298	86421798
chr10	15263152	15263652
chr3	42327837	42328337
chr1	39838792	39839292
chr15	68177802	68178302
chr3	35066801	35067301
chr3	49842136	49842636
chr17	31746677	31747177
chr17	81500689	81501189
chr6	80186754	80187254
chr16	74370604	74371104
chr2	146571684	146572184
chr7	84184640	84185140
chr3	123024473	123024973
chr6	56800223	56800723
chr17	77593766	77594266
chr17	90861887	90862387
chr8	4512036	4512536
chr10	31867565	31868065
chr16	45640350	45640850
chr16	25774551	25775051
chr5	28982544	28983044
chr10	108585393	108585893
chr2	13247090	13247590
chr9	11441102	11441602
chr6	121064117	121064617
chr2	115876006	115876506
chr1	46887791	46888291
chr2	57231353	57231853
chr15	80861226	80861726
chr13	20975849	20976349
chr1	19562169	19562669
chr8	108722670	108723170
chr17	39843928	39844428
chr7	137924726	137925226
chr14	105725803	105726303
chr16	10838797	10839297
chr15	10117003	10117503
chr13	79497295	79497795
chr8	44377642	44378142
chr11	11907952	11908452
chrX	80876064	80876564
chr17	6751253	6751753
chr3	80878537	80879037
chr1	182460746	182461246
chr2	104208025	104208525
chr8	48604414	48604914
chr13	52879780	52880280
chr15	50893115	50893615
chr13	52542119	52542619
chr15	50933036	50933536
chr4	70320593	70321093
chr10	102732081	102732581
chr12	94868244	94868744
chr3	67147120	67147620
chr13	55909877	55910377
chr3	59197477	59197977
chr15	22936258	22936758
chr6	127466873	127467373
chr17	13542714	13543214
chr2	20547085	20547585
chr12	101003074	101003574
chr15	64364385	64364885
chr12	70628553	70629053
chr1	77181502	77182002
chr3	109686677	109687177
chr16	33764408	33764908
chr4	82470175	82470675
chr5	51568231	51568731
chr8	17594569	17595069
chr7	133112432	133112932
chr3	131998995	131999495
chr4	133605164	133605664
chr12	68473309	68473809
chr8	47252321	47252821
chr19	28827708	28828208
chr15	7680984	7681484
chr7	97130523	97131023
chr3	137052708	137053208
chr9	66731097	66731597
chr11	84013132	84013632
chr19	26145342	26145842
chr5	92698452	92698952
chr16	25843557	25844057
chr13	113896676	113897176
chr2	71738481	71738981
chr1	13849012	13849512
chr18	34152483	34152983
chr5	10334367	10334867
chr11	10768054	10768554
chr9	14559470	14559970
chr1	157459775	157460275
chr3	48781427	48781927
chr13	110451971	110452471
chr17	44670266	44670766
chr19	20426533	20427033
chr18	53762407	53762907
chr5	77581228	77581728
chr6	116356245	116356745
chr13	37477774	37478274
chr12	10572003	10572503
chr2	82246815	82247315
chr10	119925848	119926348
chr16	41508552	41509052
chr10	27332464	27332964
chr1	138515311	138515811
chr13	47129333	47129833
chr4	69656423	69656923
chr8	31444835	31445335
chr8	90232533	90233033
chr16	94023536	94024036
chr4	32432804	32433304
chr10	95107752	95108252
chr3	116119018	116119518
chr7	90648015	90648515
chr2	108622752	108623252
chr13	70794137	70794637
chr4	94186848	94187348
chr12	39882260	39882760
chr1	83478437	83478937
chr14	21585592	21586092
chr6	15407899	15408399
chr10	41731138	41731638
chr14	87865553	87866053
chr4	7362070	7362570
chr17	79285178	79285678
chr12	47263321	47263821
chr12	76818077	76818577
chr8	22617194	22617694
chr15	66998180	66998680
chr15	9212903	9213403
chr1	11759381	11759881
chr8	118830232	118830732
chr17	90390883	90391383
chr13	94970101	94970601
chr15	64480559	64481059
chr15	36656622	36657122
chr13	46819236	46819736
chr15	48188914	48189414
chr9	29943192	29943692
chr9	46961136	46961636
chr6	122598514	122599014
chr6	18290560	18291060
chr3	63831014	63831514
chr17	79964829	79965329
chr4	26101961	26102461
chr18	57686603	57687103
chr11	19959757	19960257
chr19	26140531	26141031
chr7	109561750	109562250
chr9	120919023	120919523
chr16	57532122	57532622
chr14	85856402	85856902
chr3	148389438	148389938
chr4	98659426	98659926
chr16	21625763	21626263
chr8	113821134	113821634
chr6	83432966	83433466
chrX	17521008	17521508
chr2	60703275	60703775
chr8	60773338	60773838
chr10	69653162	69653662
chr1	14487568	14488068
chrX	8890794	8891294
chr2	138320999	138321499
chr4	88950572	88951072
chr1	42504543	42505043
chr16	56384848	56385348
chr18	6269839	6270339
chr1	106278499	106278999
chr1	72887839	72888339
chr7	3586211	3586711
chrX	83117233	83117733
chr10	123997027	123997527
chr1	52282174	52282674
chr17	29368722	29369222
chr3	74858277	74858777
chr13	116166656	116167156
chr12	4662040	4662540
chr18	25127375	25127875
chr10	9157488	9157988
chr11	83620830	83621330
chr2	19702999	19703499
chr17	71980746	71981246
chr11	24293839	24294339
chr8	87225858	87226358
chr17	51653847	51654347
chr10	23220407	23220907
chr6	72370952	72371452
chr4	41265763	41266263
chr4	85707486	85707986
chr12	110687923	110688423
chr2	20653066	20653566
chr12	49480385	49480885
chr15	50735948	50736448
chr13	63072270	63072770
chr10	61150428	61150928
chr13	39611510	39612010
chr8	128030800	128031300
chr3	10292523	10293023
chr13	63088180	63088680
chr11	7780540	7781040
chr16	62799429	62799929
chr3	131143194	131143694
chr7	109739866	109740366
chr12	87401800	87402300
chr9	47675073	47675573
chr5	12242194	12242694
chr3	92583082	92583582
chr4	80515916	80516416
chr2	135724468	135724968
chr16	84616473	84616973
chr15	28004474	28004974
chr11	87689518	87690018
chrX	131428322	131428822
chr13	109481357	109481857
chr15	29260162	29260662
chr18	66740345	66740845
chr12	17097796	17098296
chr15	37197831	37198331
chr1	172456222	172456722
chr8	14985972	14986472
chr11	3362806	3363306
chr9	13552367	13552867
chr13	16564950	16565450
chr18	48628854	48629354
chr1	14016794	14017294
chr15	25752415	25752915
chr13	69592196	69592696
chr16	14940406	14940906
chr10	18863284	18863784
chr1	12065056	12065556
chr6	23314262	23314762
chr3	7682856	7683356
chr6	127375766	127376266
chr16	76563583	76564083
chr2	172977380	172977880
chr1	153140808	153141308
chr3	136221302	136221802
chr1	193550732	193551232
chr3	51901087	51901587
chr8	125372295	125372795
chr10	19464314	19464814
chr7	70891639	70892139
chr16	22572610	22573110
chr7	125534860	125535360
chr11	27733012	27733512
chr16	41317776	41318276
chr6	120276985	120277485
chr16	53241981	53242481
chr18	13624197	13624697
chr2	85510417	85510917
chr17	9598043	9598543
chr6	67300834	67301334
chr6	142647579	142648079
chr11	91131132	91131632
chr2	109923104	109923604
chr10	7258465	7258965
chr6	94675602	94676102
chr3	67892071	67892571
chr8	35918557	35919057
chr12	6376470	6376970
chr3	24099142	24099642
chr3	19406171	19406671
chr1	12749239	12749739
chr15	10079435	10079935
chr8	4413703	4414203
chr13	60534744	60535244
chr18	41295484	41295984
chr3	148559704	148560204
chr14	23592867	23593367
chr8	108726505	108727005
chr16	14943461	14943961
chrX	50012177	50012677
chr6	106230893	106231393
chr3	109672801	109673301
chr11	12470606	12471106
chr8	80853318	80853818
chr13	90399120	90399620
chr13	81571289	81571789
chr14	93507897	93508397
chr10	35028448	35028948
chr8	96835470	96835970
chr15	55702017	55702517
chr3	5829627	5830127
chr7	90651066	90651566
chr15	57648337	57648837
chr10	44730742	44731242
chr14	101839994	101840494
chr1	106321302	106321802
chr1	170766861	170767361
chr4	31290148	31290648
chr5	86725416	86725916
chr12	107572523	107573023
chr2	13697507	13698007
chr2	138585830	138586330
chr16	90407845	90408345
chr9	53301414	53301914
chrX	166971653	166972153
chr1	157256503	157257003
chr9	43489795	43490295
chr16	88573057	88573557
chr6	87186819	87187319
chr1	143559886	143560386
chr15	20095735	20096235
chr7	35434168	35434668
chr4	28998387	28998887
chr3	84595167	84595667
chr12	57623996	57624496
chr9	101378989	101379489
chr8	93369189	93369689
chr8	96952595	96953095
chr8	122460462	122460962
chr10	111005058	111005558
chr1	18105026	18105526
chr7	89464054	89464554
chr8	107466761	107467261
chr9	46112266	46112766
chr10	35502606	35503106
chr10	44875417	44875917
chr3	75937934	75938434
chr3	122058444	122058944
chr5	50126588	50127088
chr13	72692117	72692617
chr7	144628231	144628731
chr14	11513493	11513993
chr1	77957246	77957746
chr13	113885732	113886232
chr13	81279305	81279805
chr6	6586186	6586686
chr15	51025849	51026349
chr9	77587041	77587541
chr17	48001895	48002395
chr16	35981486	35981986
chr12	107011063	107011563
chr9	41832453	41832953
chrX	51417692	51418192
chr5	43948018	43948518
chr4	72171762	72172262
chr10	68396136	68396636
chr8	76973064	76973564
chr2	60879039	60879539
chr7	109629855	109630355
chr3	67450690	67451190
chr7	113591082	113591582
chr1	193510025	193510525
chr14	20610090	20610590
chr1	131063967	131064467
chr8	10442681	10443181
chr15	69203864	69204364
chr7	79316282	79316782
chr15	38973421	38973921
chr3	142863217	142863717
chr2	68994855	68995355
chr5	62778676	62779176
chr2	153238365	153238865
chr5	29187942	29188442
chr15	55315500	55316000
chr1	41303459	41303959
chr13	102372659	102373159
chr10	93912752	93913252
chr3	9513689	9514189
chr6	126375216	126375716
chr1	51872850	51873350
chr3	130792566	130793066
chr6	87258747	87259247
chr8	71602662	71603162
chr9	82306218	82306718
chr11	3615543	3616043
chr8	7764018	7764518
chr1	80075666	80076166
chr6	8293917	8294417
chr16	70446058	70446558
chr5	87547169	87547669
chr19	11685900	11686400
chr19	50964866	50965366
chr9	12358272	12358772
chr19	21165633	21166133
chr2	170308937	170309437
chr3	143498927	143499427
chr3	119956003	119956503
chr11	14182010	14182510
chr2	113020079	113020579
chr10	120339243	120339743
chr3	121462716	121463216
chr12	69437069	69437569
chr1	14309857	14310357
chr3	24719219	24719719
chr10	16829377	16829877
chr2	115225940	115226440
chr7	56899854	56900354
chr16	23913367	23913867
chr5	100239630	100240130
chr8	64482753	64483253
chr4	82428044	82428544
chr3	9858316	9858816
chr8	95505577	95506077
chr2	140769088	140769588
chr1	180307619	180308119
chr3	29378349	29378849
chr12	74075555	74076055
chr19	24508276	24508776
chr19	32529498	32529998
chr8	95175635	95176135
chr15	96975105	96975605
chr1	46902244	46902744
chr15	91252448	91252948
chr2	129052537	129053037
chr7	112645833	112646333
chr5	60007224	60007724
chr3	58882936	58883436
chr19	26168188	26168688
chr16	94261045	94261545
chr1	52227960	52228460
chr12	74691047	74691547
chr3	149060989	149061489
chr9	67092982	67093482
chr13	114629970	114630470
chr17	7247081	7247581
chr17	70921583	70922083
chr6	3993677	3994177
chr14	59051456	59051956
chr16	42746155	42746655
chr6	15618483	15618983
chr1	41447158	41447658
chr18	11561933	11562433
chr17	70948708	70949208
chr8	26887107	26887607
chr8	60626179	60626679
chr3	101070778	101071278
chr17	33783241	33783741
chr14	46080795	46081295
chr8	54724219	54724719
chr4	30676997	30677497
chr2	115817856	115818356
chr7	89208528	89209028
chr9	43542123	43542623
chr8	49513986	49514486
chr1	51327072	51327572
chr14	8421023	8421523
chr8	98309357	98309857
chr8	28679692	28680192
chr6	27800706	27801206
chr6	92641966	92642466
chr2	95400763	95401263
chr1	175104497	175104997
chr1	82129849	82130349
chr15	51070979	51071479
chr18	57845175	57845675
chr5	3909336	3909836
chr5	66586284	66586784
chr3	108423990	108424490
chr10	108307741	108308241
chr17	70746572	70747072
chr2	53803179	53803679
chr3	34773655	34774155
chr17	70888574	70889074
chr7	52005952	52006452
chr14	120321984	120322484
chr1	77739120	77739620
chr10	46047024	46047524
chr6	65021904	65022404
chr13	62872145	62872645
chr10	111803395	111803895
chr3	80883543	80884043
chr17	9904544	9905044
chr10	126935531	126936031
chr14	87420458	87420958
chr1	76717659	76718159
chr17	84026088	84026588
chr4	81926583	81927083
chr10	5203781	5204281
chr5	91052432	91052932
chr6	138414704	138415204
chr12	102730378	102730878
chr5	131891781	131892281
chr13	3877202	3877702
chr15	80785464	80785964
chr9	117197452	117197952
chr5	10417607	10418107
chr7	120722799	120723299
chr7	130982381	130982881
chr4	90744017	90744517
chr1	10637139	10637639
chr18	59072851	59073351
chr5	13406375	13406875
chr16	24115380	24115880
chr8	78647811	78648311
chr9	116919434	116919934
chr17	83320379	83320879
chr5	86730503	86731003
chr2	108843870	108844370
chr10	29708441	29708941
chr6	25710646	25711146
chr2	46056247	46056747
chr2	168920004	168920504
chr1	53620337	53620837
chr10	40727003	40727503
chr4	68838490	68838990
chrX	153374999	153375499
chr17	10533620	10534120
chr10	10545163	10545663
chr10	68039608	68040108
chr12	36355724	36356224
chr11	36267195	36267695
chr17	15325947	15326447
chr9	82170270	82170770
chr5	42781188	42781688
chr8	77433308	77433808
chr2	24608612	24609112
chr7	130013063	130013563
chr1	181623128	181623628
chr12	97931854	97932354
chr3	19828400	19828900
chr19	26258576	26259076
chr1	106283134	106283634
chr10	109718730	109719230
chr7	138849606	138850106
chr17	40330225	40330725
chr5	134946568	134947068
chrX	17512101	17512601
chr10	116912550	116913050
chr15	41741807	41742307
chr5	138931993	138932493
chr10	69570925	69571425
chr16	55318288	55318788
chr12	107617154	107617654
chr13	71373181	71373681
chr17	56819752	56820252
chr1	193568507	193569007
chr1	105246225	105246725
chr13	63879407	63879907
chr14	13770618	13771118
chr13	112758275	112758775
chr10	18388715	18389215
chr4	118123123	118123623
chrX	162260917	162261417
chr18	65606301	65606801
chr2	57266899	57267399
chr4	57088302	57088802
chr8	57725207	57725707
chr17	14235062	14235562
chr10	29285710	29286210
chr8	12873616	12874116
chr1	35961912	35962412
chr15	9435773	9436273
chr15	13751268	13751768
chr5	21493591	21494091
chr3	117406769	117407269
chr16	90648066	90648566
chr2	6463940	6464440
chr1	64814019	64814519
chr18	11597088	11597588
chr12	15800807	15801307
chr2	46187231	46187731
chr5	13517904	13518404
chr1	191784989	191785489
chr4	20566950	20567450
chr10	94141228	94141728
chr10	110191936	110192436
chr11	20347386	20347886
chr3	50893195	50893695
chr12	50605736	50606236
chr17	62337885	62338385
chr9	47604234	47604734
chr12	73764601	73765101
chr1	3662426	3662926
chr17	47436323	47436823
chr13	108300556	108301056
chr19	19976364	19976864
chr13	115014090	115014590
chr8	15953241	15953741
chr18	7334730	7335230
chr5	22451740	22452240
chr14	74091791	74092291
chr7	73853256	73853756
chr2	19588262	19588762
chr16	11021640	11022140
chr10	127975505	127976005
chr1	73279111	73279611
chr4	88264531	88265031
chr16	14776534	14777498
chr13	115006315	115006815
chr10	108626315	108626815
chr2	110186422	110186922
chr1	184065893	184066393
chr10	52253377	52253877
chr12	31973469	31973969
chr18	28470402	28470902
chr3	10916937	10917437
chr3	133754600	133755100
chr13	33078263	33078763
chr3	34918225	34918725
chr3	83775379	83775879
chr5	62802826	62803326
chr8	27174389	27174889
chr2	139493769	139494269
chr13	55818805	55819305
chr16	21595323	21595823
chr18	44515098	44515598
chr5	12946723	12947223
chr7	109578885	109579385
chr8	17704073	17704573
chr11	9726674	9727174
chr5	31693086	31693586
chr6	111802926	111803426
chr17	44547980	44548480
chr12	31305993	31306493
chr15	30371049	30371549
chr17	31355698	31356198
chr16	76958543	76959043
chr7	63999091	63999591
chr2	165909650	165910150
chr5	35757516	35758016
chr2	79532663	79533163
chr1	54747890	54748390
chr8	113845628	113846128
chr12	71249524	71250024
chr16	25418168	25418668
chr3	102152847	102153347
chr10	14986590	14987090
chr13	12007904	12008404
chr15	30359742	30360242
chrX	169881668	169882168
chr3	69233631	69234131
chr13	119695660	119696160
chr3	140940377	140940877
chr19	28557524	28558024
chr3	38585418	38585918
chr12	79525931	79526431
chr4	76459523	76460023
chr18	57818894	57819394
chr6	122291928	122292428
chr5	71745662	71746162
chr8	18906829	18907329
chr10	5032370	5032870
chr15	60898917	60899417
chr7	35076615	35077115
chr4	123050833	123051333
chr1	45866602	45867102
chr1	191193487	191193987
chr7	66770691	66771191
chr10	56559570	56560070
chr11	109011660	109012160
chr18	74962069	74962569
chr13	95807124	95807624
chr12	26581474	26581974
chr10	19935813	19936313
chr2	54305432	54305932
chr9	69467434	69467934
chr12	53492635	53493135
chr2	58844464	58844964
chr15	92303274	92303774
chr15	36877412	36877912
chr4	103961125	103961625
chr13	31915246	31915746
chr12	66339102	66339602
chr5	32425628	32426128
chr11	29908790	29909290
chr9	16347752	16348252
chr1	189854653	189855153
chr4	150846181	150846681
chr5	67633523	67634023
chr5	46042454	46042954
chr2	65510140	65510640
chr12	91693530	91694030
chr17	59443573	59444073
chr8	8258360	8258860
chr2	169536975	169537475
chr13	107469511	107470011
chr3	122088274	122088774
chr14	9331573	9332073
chr15	3521723	3522223
chr15	12230418	12230918
chr10	17356035	17356535
chr1	107748576	107749076
chr3	37667698	37668198
chrX	47467203	47467703
chr4	142229021	142229521
chr3	84665412	84665912
chr12	14301577	14302077
chr3	126350232	126350732
chr3	123025672	123026172
chr8	56212176	56212676
chr12	80007768	80008268
chr8	83757025	83757525
chr10	126257110	126257610
chr4	8942974	8943474
chr6	17771356	17771856
chr11	7031847	7032347
chr16	95659210	95659710
chr15	69458535	69459035
chr4	103188854	103189354
chr1	118873499	118873999
chr17	82024310	82024810
chr1	152084555	152085055
chr6	67535483	67535983
chr9	53264284	53264784
chr4	63032582	63033082
chr1	14220100	14220600
chr10	20178734	20179234
chr13	9304715	9305215
chr6	53324138	53324638
chr15	27014413	27014913
chr13	111014061	111014561
chr11	7891167	7891667
chrX	42518739	42519239
chr11	121143258	121143758
chr9	116259555	116260055
chr9	41918769	41919269
chr16	72996051	72996551
chr6	15264004	15264504
chr18	57837318	57837818
chr1	153172378	153172878
chr2	60267493	60267993
chr1	176980440	176980940
chr3	148558982	148559482
chr15	55333416	55333916
chr10	97479343	97479843
chr10	21504403	21504903
chr3	7487777	7488277
chr1	137940205	137940705
chr13	111979681	111980181
chr3	138850374	138850874
chr3	88594087	88594587
chr7	27224889	27225389
chr11	76924819	76925319
chr9	11285037	11285537
chr4	31207814	31208314
chr16	55225270	55225770
chr5	102399040	102399540
chr7	88494405	88494905
chr16	72666535	72667035
chr2	13140572	13141072
chr9	108197230	108197730
chr6	128994175	128994675
chr6	137696719	137697219
chr1	165844496	165844996
chr4	49065855	49066355
chr4	97258758	97259258
chr12	52749957	52750457
chr11	3366378	3366878
chr13	90546666	90547166
chr2	10960767	10961267
chr4	81178718	81179218
chr3	109332670	109333170
chr2	5426034	5426534
chr1	162295447	162295947
chr12	13417080	13417580
chr2	72253791	72254291
chr13	5892671	5893171
chr5	5271023	5271523
chr3	116148195	116148695
chr2	146787334	146787834
chr2	61950842	61951342
chr9	67081514	67082014
chr16	97594150	97594650
chr9	23374961	23375461
chr3	115728182	115728682
chr3	143924151	143924651
chr8	83181774	83182274
chr7	140090583	140091083
chr14	17063384	17063884
chr8	92190593	92191093
chr6	12055940	12056440
chr12	43963784	43964284
chr3	40750044	40750544
chr6	67531172	67531672
chr16	57747273	57747773
chr14	108791226	108791726
chr19	14586313	14586813
chr4	87838626	87839126
chr5	101764916	101765416
chrX	164283740	164284240
chr19	20953183	20953683
chr4	12645856	12646356
chr3	37962836	37963336
chr17	87609557	87610057
chr6	7350699	7351199
chr19	14499929	14500429
chr8	92387777	92388277
chr6	134168500	134169000
chr1	154695156	154695656
chr15	5461692	5462192
chr12	98139855	98140355
chr12	119218038	119218538
chr1	151650681	151651181
chr11	25349619	25350119
chr1	32959548	32960048
chr18	28899673	28900173
chr15	11729403	11729903
chr10	99204099	99204599
chr2	142807621	142808121
chr10	70595039	70595539
chr4	94715058	94715558
chr10	18370868	18371368
chr1	106077443	106077943
chr1	102505720	102506220
chr12	24877219	24877719
chrX	42401411	42401911
chr14	120203361	120203861
chr5	9042657	9043157
chr3	34456817	34457317
chr11	92169242	92169742
chr16	64265044	64265544
chr14	37523584	37524084
chr12	57034508	57035008
chr13	29628229	29628729
chr10	85533164	85533664
chr13	115989020	115989520
chr16	97763541	97764041
chr5	44836323	44836823
chr2	47377133	47377633
chr1	18223649	18224149
chr1	165302665	165303165
chr12	36385614	36386114
chr12	55478553	55479053
chr12	107281188	107281688
chr17	6869187	6869687
chr9	79165578	79166078
chr9	16450606	16451106
chr16	14930707	14931207
chr15	91577527	91578027
chr12	36507017	36507517
chr15	50798780	50799280
chr4	46055828	46056328
chr12	79466390	79466890
chr2	115346489	115346989
chr18	29835689	29836189
chr10	118917442	118917942
chr13	72352819	72353319
chr19	47559448	47559948
chr4	128736999	128737499
chr10	94843183	94843683
chr1	188667422	188667922
chr10	43578874	43579374
chr10	47028736	47029236
chr2	72996939	72997439
chr5	99218261	99218761
chr17	5600448	5600948
chr11	100261917	100262417
chr15	35103106	35103606
chr19	27736574	27737074
chr11	29926522	29927022
chr2	134001179	134001679
chrX	103437559	103438059
chr4	71522605	71523105
chr11	36305535	36306035
chr3	148429111	148429611
chr19	28186523	28187023
chr16	21650234	21650734
chr7	130053772	130054272
chr14	118551261	118551761
chr11	87276498	87276998
chr8	8292727	8293227
chr3	151363253	151363753
chr2	72241824	72242324
chrX	152690722	152691222
chr16	16865830	16866330
chr16	62173235	62173735
chr1	86449931	86450431
chr3	141112462	141112962
chr4	29068305	29068805
chr3	44716736	44717236
chr3	60424117	60424617
chr15	39248240	39248740
chr3	25508355	25508855
chr15	94074020	94074520
chr1	135258430	135258930
chr5	92263652	92264152
chr6	22366737	22367237
chr8	103145324	103145824
chr3	79994183	79994683
chr1	117021917	117022417
chr13	29246422	29246922
chr17	37039225	37039725
chr15	14311642	14312142
chr13	91165177	91165677
chrX	13524210	13524710
chr11	99500099	99500599
chr12	33497315	33497815
chr4	150871387	150871887
chr11	71512460	71512960
chr5	119213667	119214167
chr16	90656396	90656896
chr1	73302924	73303424
chr5	44555841	44556341
chr8	99441764	99442264
chr13	28718639	28719139
chr19	10723775	10724275
chr14	79961072	79961572
chr10	108504827	108505327
chr8	77011838	77012338
chr9	102805967	102806467
chr10	13140241	13140741
chr1	137656922	137657422
chr18	33552476	33552976
chr17	11638459	11638959
chr16	74124170	74124670
chr3	51096278	51096778
chr16	26792272	26792772
chr6	140924093	140924593
chr16	26715566	26716066
chr8	35534759	35535259
chr8	30735434	30735934
chr13	62993502	62994002
chr6	23549838	23550338
chr14	12643966	12644466
chr12	87327591	87328091
chr3	126869481	126869981
chr11	110773703	110774203
chr17	50574205	50574705
chr11	121090941	121091441
chr7	86604490	86604990
chr4	30312185	30312685
chr3	94649200	94649700
chr14	94968246	94968746
chr3	29632311	29632811
chr3	69423382	69423882
chr10	12931437	12931937
chr13	38594260	38594760
chr3	35320086	35320586
chr1	135933716	135934216
chr5	7655196	7655696
chr12	91149550	91150050
chr1	75704806	75705306
chr6	61432108	61432608
chr5	102068021	102068521
chr5	99384519	99385019
chr6	31456925	31457425
chr18	33932467	33932967
chr10	39855288	39855788
chr18	65739594	65740094
chr4	31993306	31993806
chr16	92511265	92511765
chr6	84666691	84667191
chr13	114744739	114745239
chr10	54360758	54361258
chr7	54446505	54447005
chr7	98997724	98998224
chr2	78479921	78480421
chr6	112932528	112933028
chr13	31863438	31863938
chr11	88593880	88594380
chr2	17939720	17940220
chr7	64936871	64937371
chr8	34622647	34623147
chr5	113138346	113138846
chr18	78896435	78896935
chr9	72790724	72791224
chr16	44016147	44016647
chr14	82065172	82065672
chr17	78213061	78213561
chr2	52442001	52442501
chr1	86833082	86833582
chr3	110904514	110905014
chr1	135494995	135495495
chr17	14608195	14608695
chr3	109732267	109732767
chr4	89353432	89353932
chr8	47217974	47218474
chr19	57128061	57128561
chr8	36640225	36640725
chr12	68554871	68555371
chr16	44101189	44101689
chr10	23396744	23397244
chr7	130215738	130216238
chr15	100119376	100119876
chr3	38154464	38154964
chr3	148978112	148978612
chr13	90265753	90266253
chr13	104914426	104914926
chr9	83349443	83349943
chr2	58710123	58710623
chr7	87241065	87241565
chr8	10794184	10794684
chr9	94424891	94425391
chr3	41318803	41319303
chr14	61354601	61355101
chr12	39516858	39517358
chr12	58198809	58199309
chr16	56298804	56299304
chr9	76566930	76567430
chr7	99975421	99975921
chr9	35247765	35248265
chr18	63481884	63482384
chr6	23498573	23499073
chr18	55539051	55539551
chr19	26234575	26235075
chr4	90965348	90965848
chr7	93076376	93076876
chr15	86738154	86738654
chr14	118502612	118503112
chr8	127025318	127025818
chr4	142826163	142826663
chr2	142334349	142334849
chr1	105717670	105718170
chr2	79822892	79823392
chr4	4225794	4226294
chr3	24921765	24922265
chr1	15936510	15937010
chr1	136781724	136782224
chr6	17316656	17317156
chr14	98483216	98483716
chr3	52663269	52663769
chr2	110520836	110521336
chrX	42499458	42499958
chr6	7830800	7831300
chr9	120593414	120593914
chr18	15580956	15581456
chrX	120944574	120945074
chr1	64809044	64809544
chr18	45969822	45970322
chr8	100887463	100887963
chr2	44873654	44874154
chr8	62302718	62303218
chr15	11672128	11672628
chrX	164135714	164136214
chr16	51811005	51811505
chr5	48039136	48039636
chr9	97767206	97767706
chr12	91755277	91755777
chr18	57604888	57605388
chr3	46825550	46826050
chr18	32474090	32474590
chr19	28389048	28389548
chr3	142120288	142120788
chr5	138647237	138647737
chr15	30382957	30383457
chr17	94382940	94383440
chr8	103884798	103885298
chr15	97315294	97315794
chr15	69481182	69481682
chr2	63618659	63619159
chr1	180279643	180280143
chr1	169621243	169621743
chr1	189830739	189831239
chr13	73374150	73374650
chr2	106674668	106675168
chr2	147352658	147353158
chr6	112728749	112729249
chr17	35697890	35698390
chr11	58250474	58250974
chr4	130984459	130984959
chr10	91014236	91014736
chr10	52797421	52797921
chr1	52079872	52080372
chr14	105238758	105239258
chr4	25464799	25465299
chr8	104902730	104903230
chr10	125362592	125363092
chr1	3398911	3399411
chr3	49152829	49153329
chr16	6964870	6965370
chr14	12874941	12875441
chr10	126028657	126029157
chr17	59549098	59549598
chr5	105925568	105926068
chr16	69680947	69681447
chr16	46679122	46679622
chr2	14917547	14918047
chr10	72634081	72634581
chr5	72639489	72639989
chr15	82721418	82721918
chr12	54620278	54620778
chr3	109584683	109585183
chr19	34165754	34166254
chr6	121616457	121616957
chr11	88153809	88154309
chr1	68041969	68042469
chr18	35104860	35105360
chr1	13308849	13309349
chr2	49912140	49912640
chr10	43718794	43719294
chr10	102548308	102548808
chrX	93659843	93660343
chr15	23258038	23258538
chr1	133231638	133232138
chr1	185955680	185956180
chr19	32884207	32884707
chr9	43447458	43447958
chr14	101763747	101764247
chr16	91452368	91452868
chr12	70544852	70545352
chr2	124435534	124436034
chr2	63819196	63819696
chr12	52138295	52138795
chr2	23616762	23617262
chr3	29608669	29609169
chr17	22349269	22349769
chr8	8487568	8488068
chr13	47843373	47843873
chr1	189784571	189785071
chr1	90519606	90520106
chr3	69475313	69475813
chr8	61254133	61254633
chr14	99900923	99901423
chr10	73237958	73238458
chr3	21955289	21955789
chr19	21723777	21724277
chr2	116711159	116711659
chr3	147347449	147347949
chr9	43035156	43035656
chr9	99797375	99797875
chr6	103567284	103567784
chr12	3781135	3781635
chr13	3831908	3832408
chr8	24442377	24442877
chr15	52297836	52298336
chr10	120717326	120717826
chr1	77093545	77094045
chr4	84317346	84317846
chr7	99961039	99961539
chr3	115801466	115801966
chr18	54984511	54985011
chr8	4837691	4838191
chr16	64248465	64248965
chr7	18244989	18245489
chr8	44758667	44759167
chr2	79597042	79597542
chr5	100266623	100267123
chr18	40103367	40103867
chr16	31290755	31291255
chr18	88685564	88686064
chr3	143743147	143743647
chr11	87677990	87678490
chr1	157055255	157055755
chr16	65851497	65851997
chr3	144089650	144090150
chr2	146062608	146063108
chr2	135721847	135722347
chr3	47662435	47662935
chr13	116514855	116515355
chr2	160082072	160082572
chr14	118589341	118589841
chr10	35373241	35373741
chr9	96865611	96866111
chr4	152833665	152834165
chr4	67115938	67116438
chr16	84824634	84825134
chrX	57318299	57318799
chr5	29086088	29086588
chr7	19686833	19687333
chr6	98555623	98556123
chr15	38938530	38939030
chr12	57593500	57594000
chr3	56097013	56097513
chr5	141234305	141234805
chr3	126625036	126625536
chrX	51232778	51233278
chr19	47691637	47692137
chr19	16016143	16016643
chr14	108199075	108199575
chr2	61134818	61135318
chr5	64218437	64218937
chr6	22141352	22141852
chr10	34094720	34095220
chr6	29726426	29726926
chr10	67912446	67912946
chr4	27505234	27505734
chr18	15015203	15015703
chr15	13969785	13970285
chr13	16487065	16487565
chrX	130596618	130597118
chr7	53992372	53992872
chr1	77254291	77254791
chr1	183164248	183164748
chr11	24634714	24635214
chr3	35209918	35210418
chr2	101759512	101760012
chr4	25035633	25036133
chr11	28908469	28908969
chr1	179136718	179137218
chr3	151115750	151116250
chr5	28913928	28914428
chr12	24963314	24963814
chr4	24555994	24556494
chr6	127349299	127349799
chr15	23455866	23456366
chr4	82566829	82567329
chr2	116095814	116096314
chr3	81243304	81243804
chr14	59447816	59448316
chr14	7847635	7848135
chrX	52288746	52289246
chr10	88222729	88223229
chr5	88426646	88427146
chr13	19074833	19075333
chr15	92308438	92308938
chr2	160036195	160036695
chr2	38499346	38499846
chr14	7999265	7999765
chr13	39904149	39904649
chr18	33065307	33065807
chr10	9272180	9272680
chr18	44744417	44744917
chr1	39445214	39445714
chr1	119421231	119421731
chr7	89657219	89657719
chr15	20422625	20423125
chr1	182535085	182535585
chr18	20517901	20518401
chr9	34334060	34334560
chr5	49266817	49267317
chr7	25575913	25576413
chr12	98859543	98860043
chr15	36351828	36352328
chr6	145993017	145993517
chr18	61268740	61269240
chr7	80186888	80187388
chr2	129166987	129167487
chr9	118975323	118975823
chr3	34825060	34825560
chr14	99305339	99305839
chr9	14574884	14575384
chr16	76813000	76813500
chr3	138715218	138715718
chr6	99225865	99226365
chr7	68140367	68140867
chr19	21799800	21800300
chr8	6648050	6648550
chr2	171365502	171366002
chr2	160029367	160029867
chr1	193082368	193082868
chr11	28881451	28881951
chr3	152322100	152322600
chr5	52332124	52332624
chr12	98178275	98178775
chr3	40682360	40682860
chr1	69084089	69084589
chr12	57781870	57782370
chr9	115665110	115665610
chr3	96663441	96663941
chr2	124329493	124329993
chr4	88723425	88723925
chr16	20860565	20861065
chr13	47636607	47637107
chr16	25779877	25780377
chr10	96924253	96924753
chr7	105568967	105569467
chr16	40709395	40709895
chr4	148853533	148854033
chr10	43920742	43921242
chr8	44971139	44971639
chr11	72142842	72143342
chr13	94817802	94818302
chr15	96547520	96548020
chr6	19777311	19777811
chr5	10416901	10417401
chr18	11400760	11401260
chr3	55721124	55721624
chr8	14225955	14226455
chr3	16482780	16483280
chr1	77080743	77081243
chr17	43982832	43983332
chr10	82843973	82844473
chr14	17578713	17579213
chr11	111256086	111256586
chr10	44715412	44715912
chr2	115375294	115375794
chr10	36695970	36696470
chr10	13688548	13689048
chr10	8505649	8506149
chr4	88136153	88136653
chr6	5301715	5302215
chr16	72678937	72679437
chrX	167636645	167637145
chr8	8109714	8110214
chr18	63765849	63766349
chr1	184126894	184127394
chr15	50338273	50338773
chr16	24056864	24057364
chr13	96574097	96574597
chr3	76773579	76774079
chr19	15328629	15329129
chr13	34212817	34213317
chr12	55755684	55756184
chr8	10990723	10991223
chr18	26094232	26094732
chr17	82198996	82199496
chr3	58334004	58334504
chr3	85931805	85932305
chr7	118895656	118896156
chr14	64959584	64960084
chr19	37896056	37896556
chr1	39237768	39238268
chr13	97201056	97201556
chr17	81404203	81404703
chr1	193140968	193141468
chr4	48936457	48936957
chr15	91917747	91918247
chr1	15649662	15650162
chr2	59200519	59201019
chr16	20818742	20819242
chr1	167482695	167483195
chr12	39048325	39048825
chr7	83382885	83383385
chr12	57436797	57437297
chr14	98132858	98133358
chr16	89908120	89908620
chr13	118669715	118670215
chr1	36060259	36060759
chr13	17289081	17289581
chr6	135295371	135295871
chr6	15987218	15987718
chr1	32471152	32471652
chr1	157090981	157091481
chr1	99970486	99970986
chr10	44381090	44381590
chr14	53633737	53634237
chr18	34132590	34133090
chr10	125987929	125988429
chr13	95488636	95489136
chr2	178920457	178920957
chr1	69433935	69434435
chr5	14170640	14171140
chr10	35120364	35120864
chr9	47291355	47291855
chr4	24942681	24943181
chr1	128000846	128001346
chr3	76771531	76772031
chr12	54272146	54272646
chr1	71432497	71432997
chr7	72306446	72306946
chrX	97086420	97086920
chr14	40386114	40386614
chr16	30060417	30060917
chr16	55283405	55283905
chr15	50741893	50742393
chr18	40429868	40430368
chr13	104491033	104491533
chr15	96107525	96108025
chr3	105780756	105781256
chr10	108638985	108639485
chr12	25181295	25181795
chr13	69386624	69387124
chr7	95809852	95810352
chr3	129901145	129901645
chr2	135632278	135632778
chr5	72172693	72173193
chr13	63272482	63272982
chr8	34688734	34689234
chr11	13553363	13553863
chr1	162202690	162203190
chr7	16991598	16992098
chr1	21658591	21659091
chr6	120294481	120294981
chr2	100132888	100133388
chr4	59859993	59860493
chr14	14012450	14012950
chr13	64534111	64534611
chr6	15242514	15243014
chr9	121057691	121058191
chr8	106510659	106511159
chr5	4689107	4689607
chr15	63988984	63989484
chr9	14042623	14043123
chr12	103131314	103131814
chr2	91875978	91876478
chr3	148489295	148489795
chr14	117849747	117850247
chr5	133753818	133754318
chr1	125516831	125517331
chr6	98945402	98945902
chr10	117908074	117908574
chrX	23118052	23118552
chr6	28717599	28718099
chr19	22656734	22657234
chr4	100181838	100182338
chr1	43290444	43290944
chr4	46291548	46292048
chr8	49455797	49456297
chr13	100552237	100552737
chr5	23516876	23517376
chr11	52579022	52579522
chr2	10221779	10222279
chr4	20588993	20589493
chr3	53164779	53165279
chr11	22963332	22963832
chr3	104115021	104115521
chr18	12262043	12262543
chr3	20771051	20771551
chr4	97126050	97126550
chr3	24796673	24797173
chr4	123093417	123093917
chr3	53080610	53081110
chr2	150770762	150771262
chr16	77650639	77651139
chr15	54571141	54571641
chr2	103293186	103293686
chr13	73107335	73107835
chr5	125203247	125203747
chr3	81109804	81110304
chr10	44831019	44831519
chr1	171477920	171478420
chr8	91304423	91304923
chr13	92675914	92676414
chr10	67565925	67566425
chr10	111388002	111388502
chr2	114438305	114438805
chr13	41549202	41549702
chr2	49817108	49817608
chr5	17164982	17165482
chr1	134733577	134734077
chr15	38244797	38245297
chr9	8032786	8033286
chrX	85428876	85429376
chr10	21261811	21262311
chr6	22140696	22141196
chr7	29505386	29505886
chr3	128791967	128792467
chr3	54037102	54037602
[truncated: 12,256 more rows]

## Sheet: 1h
chr7	115453354	115453854
chr3	115027970	115028470
chr11	35053063	35053563
chr10	10701163	10701663
chr18	38835306	38835806
chr9	10229698	10230198
chr2	14312538	14313038
chr8	35020401	35020901
chr10	38855127	38855627
chr1	158213693	158214193
chr11	51414460	51414960
chr16	27195585	27196085
chr5	38184879	38185379
chr9	25387919	25388419
chr3	151905673	151906173
chr7	91785360	91785860
chr1	92130501	92131001
chr16	90999772	91000272
chr16	15103947	15104447
chr8	79868232	79868732
chr16	78040155	78040655
chrX	22747240	22747740
chr18	87289167	87289667
chr2	84248040	84248540
chr5	14230937	14231437
chr16	87575676	87576176
chr18	11330208	11330708
chr17	83990354	83990854
chr15	12408108	12408608
chr16	72957577	72958077
chr4	82197708	82198208
chr13	37214854	37215354
chr7	35688778	35689278
chr11	85492067	85492567
chr16	74467143	74467643
chr1	15154966	15155466
chr3	84209043	84209543
chr15	86645150	86645650
chr18	88879283	88879783
chr9	92707001	92707501
chr3	108689995	108690495
chr2	125275600	125276100
chr8	27607013	27607513
chr9	45849705	45850205
chr7	111365272	111365772
chr10	59543212	59543712
chr15	99333061	99333561
chr10	99411607	99412107
chr1	97656040	97656540
chr15	47943053	47943553
chr14	100366218	100366718
chr11	16606636	16607136
chr10	31467112	31467612
chr16	15294918	15295418
chr1	162254936	162255436
chr15	52928332	52928832
chr14	87541407	87541907
chr1	77866028	77866528
chr1	127981121	127981621
chr10	78297779	78298279
chr11	12867546	12868046
chr3	21557935	21558435
chr3	108759821	108760321
chr8	13654604	13655104
chr12	119449932	119450432
chr12	99467813	99468313
chr2	6320223	6320723
chr8	122556120	122556620
chr4	6109082	6109582
chr10	41957607	41958107
chr9	41768282	41768782
chr6	140456709	140457209
chr8	79534267	79534767
chr19	12545236	12545736
chr8	91221768	91222268
chr14	78060194	78060694
chr15	43585822	43586322
chr18	47256217	47256717
chr2	101762901	101763401
chr13	49466609	49467109
chr11	78505362	78505862
chr1	60823171	60823671
chr8	118847073	118847573
chr13	90814452	90814952
chr16	21441005	21441505
chr16	40295088	40295588
chr3	131470577	131471077
chr1	167660692	167661192
chr1	150708459	150708959
chr8	40215334	40215834
chrX	57303068	57303568
chr13	20217671	20218171
chr18	61526646	61527146
chr18	79487733	79488233
chr9	84094074	84094574
chr3	38413387	38413887
chr15	33015126	33015626
chr9	70241327	70241827
chr16	96563610	96564110
chr8	61646357	61646857
chr7	70696947	70697447
chr13	71868722	71869222
chr16	97863481	97863981
chr13	102933624	102934124
chr7	76309409	76309909
chr8	44094768	44095268
chr4	97093412	97093912
chr15	24916583	24917083
chr16	85985995	85986495
chr4	32283853	32284353
chr11	86944488	86944988
chr4	18446714	18447214
chr1	163126260	163126760
chr18	22482544	22483044
chr18	23767287	23767787
chr1	44810222	44810722
chr10	95182917	95183417
chr9	36826494	36826994
chr17	3405294	3405794
chr11	89145138	89145638
chr4	127440651	127441151
chr2	45522873	45523373
chr15	8806244	8806744
chr1	121116873	121117373
chr17	62776686	62777186
chr19	22916430	22916930
chr13	13576352	13576852
chr12	71569663	71570163
chr16	35240274	35240774
chr10	24365366	24365866
chr13	79784924	79785424
chr15	92268895	92269395
chr6	10758596	10759096
chr18	24186632	24187132
chr18	16593323	16593823
chr3	112787639	112788139
chr9	79607974	79608474
chr1	94642166	94642666
chr8	35268191	35268691
chr14	10631056	10631556
chr16	42255687	42256187
chr1	189398598	189399098
chr19	24719481	24719981
chr3	45965786	45966286
chr19	48475793	48476293
chr16	59517383	59517883
chr10	76668843	76669343
chr2	46107110	46107610
chr15	44760299	44760799
chr13	32508395	32508895
chr4	55651108	55651608
chr14	99876683	99877183
chr11	47389464	47389964
chr6	105847223	105847723
chr2	92831996	92832496
chr12	79531748	79532248
chr18	39250816	39251316
chr8	4535912	4536412
chr7	115411399	115411899
chr2	117435898	117436398
chr6	54532518	54533018
chr2	141565942	141566442
chr18	56035063	56035563
chr2	117573754	117574254
chr13	101896854	101897354
chr3	4267407	4267907
chr11	29924128	29924628
chr4	71218018	71218518
chr14	117377556	117378056
chr13	10909024	10909524
chr18	5101142	5101642
chr13	34799022	34799522
chr4	55928828	55929328
chr2	71374362	71374862
chr11	34420983	34421483
chr3	102611323	102611823
chr14	101222172	101222672
chr17	59631104	59631604
chr14	59878005	59878505
chr6	88753352	88753852
chr8	70934796	70935296
chr4	24969059	24969559
chr6	11585196	11585696
chr15	83223531	83224031
chr1	83871082	83871582
chr13	90474028	90474528
chr17	49592788	49593288
chr16	72362144	72362644
chrX	59710994	59711494
chr2	65792983	65793483
chr11	106794659	106795159
chr8	114671175	114671675
chr3	98086125	98086625
chr18	13621059	13621559
chr17	62775384	62775884
chr10	39701260	39701760
chr14	101784391	101784891
chr15	40297021	40297521
chr5	99084137	99084637
chr2	129960292	129960792
chr4	101707842	101708342
chr1	125639335	125639835
chr14	76979559	76980059
chr8	48100280	48100780
chr15	53113733	53114233
chr3	8873671	8874171
chr1	144280675	144281175
chr2	137631687	137632187
chr17	45073180	45073680
chr9	21496723	21497223
chr1	151686687	151687187
chr6	143571369	143571869
chr15	59585235	59585735
chr5	4530369	4530869
chr15	37734047	37734547
chr12	66888641	66889141
chr10	31539195	31539695
chr3	38875232	38875732
chr11	86820726	86821226
chr5	81370470	81370970
chr1	14512644	14513144
chr6	139738315	139738815
chr8	91263680	91264180
chr13	93388516	93389016
chr16	86159327	86159827
chr8	26688013	26688513
chr14	79089407	79089907
chr10	13212779	13213279
chr9	88421406	88421906
chr13	106691613	106692113
chr17	90653272	90653772
chr6	91020755	91021255
chr13	19518347	19518847
chr16	10843899	10844399
chr4	70390995	70391495
chr14	100270115	100270615
chr8	86668685	86669185
chr1	156964530	156965030
chr11	46917284	46917784
chr8	103238497	103238997
chr17	42580495	42580995
chr17	14767188	14767688
chr13	32585240	32585740
chr14	105979619	105980119
chr8	7060039	7060539
chr3	115695182	115695682
chr16	64585811	64586311
chr10	23754136	23754636
chr4	5676592	5677092
chr14	8297751	8298251
chr7	121090632	121091132
chr13	107935659	107936159
chr10	78356067	78356567
chr12	3451801	3452301
chr12	15135234	15135734
chr4	109918021	109918521
chr12	7512811	7513311
chr5	50228329	50228829
chr10	7040057	7040557
chr13	15867122	15867622
chr17	61899919	61900419
chr1	60876534	60877034
chr13	57846331	57846831
chr19	40647530	40648030
chr2	69352327	69352827
chr1	153711424	153711924
chr19	23382358	23382858
chr4	30933473	30933973
chr2	74894048	74894548
chr1	66931912	66932412
chr4	116300815	116301315
chr18	50897078	50897578
chr10	65180720	65181220
chr6	142609855	142610355
chr13	110353798	110354298
chr11	21644280	21644780
chr2	50446325	50446825
chr6	50726193	50726693
chr15	27782720	27783220
chr2	114735143	114735643
chr5	81107378	81107878
chr7	115379536	115380036
chr16	42872029	42872529
chr18	42658187	42658687
chr1	61081116	61081616
chr7	6802277	6802777
chr8	28299331	28299831
chr2	16491262	16491762
chr2	168628071	168628571
chr16	93993804	93994304
chr3	141491615	141492115
chr4	123239436	123239936
chr10	23562252	23562752
chr6	36926355	36926855
chr14	117904224	117904724
chr1	12285536	12286036
chr13	103316659	103317159
chr10	30549988	30550488
chr6	147816816	147817316
chr16	71062729	71063229
chr18	16750261	16750761
chr6	135092921	135093421
chr17	45276955	45277455
chr6	47404559	47405059
chr5	49196628	49197128
chr9	22839542	22840042
chr16	45261995	45262495
chr13	79967964	79968464
chr6	99762173	99762673
chr1	186287769	186288269
chr18	70372053	70372553
chr9	67550016	67550516
chr10	102971432	102971932
chrX	93064593	93065093
chr16	45819878	45820378
chr9	120206859	120207359
chr3	47095289	47095789
chr12	21139523	21140023
chr8	121665215	121665715
chr18	79417641	79418141
chr3	55511596	55512096
chr2	154915783	154916283
chr14	87694819	87695319
chr18	34401202	34401702
chr12	10617390	10617890
chr15	34846512	34847012
chr19	24098607	24099107
chr5	101445736	101446236
chr2	75763226	75763726
chr13	93957873	93958373
chr2	177193242	177193742
chr15	39221983	39222483
chr2	13558526	13559026
chr1	118442582	118443082
chr18	7512218	7512718
chr12	64449924	64450424
chr8	47082428	47082928
chr6	143590059	143590559
chr1	191881198	191881698
chr3	20710446	20710946
chr17	89067374	89067874
chr15	73154566	73155066
chr13	97410471	97410971
chr13	92857395	92857895
chr8	91282540	91283040
chr8	32376954	32377454
chr15	42591134	42591634
chr8	92505576	92506076
chr9	69472620	69473120
chr15	77089190	77089690
chr2	5199222	5199722
chr1	39312497	39312997
chr1	14129447	14129947
chr2	50123301	50123801
chr13	92720785	92721285
chr8	23301542	23302042
chr1	162003960	162004460
chr1	192798536	192799036
chr12	82309422	82309922
chr10	97292657	97293157
chr10	64641555	64642055
chr4	149661898	149662398
chr3	81667401	81667901
chr5	75279650	75280150
chr4	18320699	18321199
chr1	14716334	14716834
chrX	168977788	168978288
chr16	45331340	45331840
chr14	122570752	122571252
chr12	8056116	8056616
chr3	100394902	100395402
chr15	27808512	27809012
chr9	68999050	68999550
chr5	12099054	12099554
chr6	100725493	100725993
chr12	35214916	35215416
chr18	74472238	74472738
chr11	118363021	118363521
chr3	101779180	101779680
chr1	30017494	30017994
chr4	49750971	49751471
chr3	108379148	108379648
chr5	118535085	118535585
chr18	47281670	47282170
chr4	77259388	77259888
chr2	139334173	139334673
chr2	36184841	36185341
chr3	102266156	102266656
chr6	104403113	104403613
chr8	18816993	18817493
chr5	25544050	25544550
chr14	123201793	123202293
chr6	118858374	118858874
chr1	12062585	12063085
chr15	52414449	52414949
chr8	121465129	121465629
chr14	83959055	83959555
chr13	108084123	108084623
chr13	20223046	20223546
chr18	47357597	47358097
chr13	83649030	83649530
chr8	34871018	34871518
chr12	35478841	35479341
chr1	42748641	42749141
chr15	63411558	63412058
chr18	56250686	56251186
chr10	7991667	7992167
chr14	25795512	25796012
chr1	62248384	62248884
chr8	89507579	89508079
chr2	142149254	142149754
chr3	84702988	84703488
chr1	62770279	62770779
chr18	84700389	84700889
chr6	117405873	117406373
chr3	114053528	114054028
chr1	144112963	144113463
chr10	42713031	42713531
chr2	3816048	3816548
chr2	78539706	78540206
chr12	100711259	100711759
chrX	14283831	14284331
chr12	31218798	31219298
chrX	133912939	133913439
chr14	55664684	55665184
chr1	163267043	163267543
chr13	31677620	31678120
chr10	98691725	98692225
chr14	121261199	121261699
chr2	123024784	123025284
chr18	52808445	52808945
chr12	46395211	46395711
chr3	53265687	53266187
chr15	62112085	62112585
chr2	173352267	173352767
chr1	120842493	120842993
chr19	21834956	21835456
chr3	108751077	108751577
chr10	96460554	96461054
chr3	57004829	57005329
chr6	77516139	77516639
chr4	40580144	40580644
chrX	10566668	10567168
chr6	37571903	37572403
chr16	55747220	55747720
chr2	173377756	173378256
chr13	3770401	3770901
chr12	103565986	103566486
chr10	68707088	68707588
chr13	114641086	114641586
chr8	72295560	72296060
chr13	103636522	103637022
chr15	31568391	31568891
chr15	13126873	13127373
chr14	77153385	77153885
chr11	33445046	33445546
chr9	37870226	37870726
chr14	120148782	120149282
chr10	26350740	26351240
chr13	3670058	3670558
chr10	67223849	67224349
chr1	121323057	121323557
chrX	107508753	107509253
chr3	86443320	86443820
chr11	89606266	89606766
chr7	107664417	107664917
chr6	141399304	141399804
chr18	47151170	47151670
chr8	25074626	25075126
chr11	54413012	54413512
chr3	30476948	30477448
chr19	22780519	22781019
chr7	116122829	116123329
chr4	84018526	84019026
chr9	66620507	66621007
chr2	19555797	19556297
chr5	66958045	66958545
chr6	22459429	22459929
chr10	110386399	110386899
chr2	53094971	53095471
chr6	104386346	104386846
chr15	81137328	81137828
chr15	71531250	71531750
chr15	18951537	18952037
chr3	132877209	132877709
chr13	118731869	118732369
chr2	144245330	144245830
chr9	80382816	80383316
chr16	44752374	44752874
chr17	44842103	44842603
chr11	63879293	63879793
chr2	159241333	159241833
chr10	39769018	39769518
chrX	21434743	21435243
chr1	175574043	175574543
chr9	92411397	92411897
chr1	57741672	57742172
chr10	36308889	36309389
chr6	108095542	108096042
chr1	175753303	175753803
chr1	60604639	60605139
chr12	16151098	16151598
chr15	25567598	25568098
chr14	101509667	101510167
chr3	121553241	121553741
chr10	91199361	91199861
chr4	56136738	56137238
chr3	9898382	9898882
chr1	138388653	138389153
chr14	37306574	37307074
chr9	32385617	32386117
chr2	129852086	129852586
chr8	79678919	79679419
chr17	84258609	84259109
chr13	19052708	19053208
chr5	111644010	111644510
chr4	129218624	129219124
chr2	117190818	117191318
chr7	115485630	115486130
chr9	95034643	95035143
chr11	53749325	53749825
chr12	99699986	99700486
chr2	106653526	106654026
chr5	30002135	30002635
chr3	59454054	59454554
chr12	44524609	44525109
chr5	71822526	71823026
chr19	23972904	23973404
chr9	72877825	72878325
chr1	162957346	162957846
chr10	17042966	17043466
chr17	34680801	34681301
chr18	35376258	35376758
chr8	84722693	84723193
chr14	122607396	122607896
chr7	16002112	16002612
chrX	147535635	147536135
chr16	92719710	92720210
chr12	60211999	60212499
chr1	161025341	161025841
chr18	7199484	7199984
chr18	63586436	63586936
chr8	79449375	79449875
chr6	30671643	30672143
chr4	53304044	53304544
chr5	47469343	47469843
chr3	132359572	132360072
chr2	125295462	125295962
chr6	141050289	141050789
chr1	42775092	42775592
chr14	74877203	74877703
chr10	38965302	38965802
chr14	102505822	102506322
chr2	83714667	83715167
chr3	142237559	142238059
chr6	116791238	116791738
chr13	58845234	58845734
chr2	166468958	166469458
chr14	60806812	60807312
chr2	90545395	90545895
chr2	142244497	142244997
chr3	120969973	120970473
chr16	49951266	49951766
chr1	163299480	163299980
chr2	126322591	126323091
chr6	9078243	9078743
chr2	170411681	170412181
chr14	16554558	16555058
chr1	162207189	162207689
chr16	90547705	90548205
chr16	58583195	58583695
chr12	71337883	71338383
chr3	159760665	159761165
chr2	84525820	84526320
chr8	61662738	61663238
chr9	83657210	83657710
chr16	34640987	34641487
chr16	25041823	25042323
chr2	144224446	144224946
chr1	126442164	126442664
chr2	18923775	18924275
chr17	85748532	85749032
chr18	50087374	50087874
chr5	57779750	57780250
chr10	20455106	20455606
chr14	117841762	117842262
chr1	158192960	158193460
chr3	36492705	36493205
chr12	103433942	103434442
chr2	132006525	132007025
chrX	162705553	162706053
chr3	118443678	118444178
chr13	80864084	80864584
chr12	94910610	94911110
chr8	39759688	39760188
chr3	83541309	83541809
chr9	14965455	14965955
chr12	5770459	5770959
chr1	80654156	80654656
chr14	78329851	78330351
chr2	84217851	84218351
chr14	78254176	78254676
chr16	63693524	63694024
chr7	64942385	64942885
chr4	13659111	13659611
chr2	43858642	43859142
chrX	142665383	142665883
chr8	61428993	61429493
chr6	5935518	5936018
chr6	90764035	90764535
chr3	108174747	108175247
chr15	10628555	10629055
chr17	78521292	78521792
chr1	90855774	90856274
chr10	43279563	43280063
chr5	136861450	136861950
chr3	145691829	145692329
chr10	97293889	97294389
chr10	87676215	87676715
chr9	51986182	51986682
chr5	133482298	133482798
chr14	101287691	101288191
chr6	140505439	140505939
chr3	18084984	18085484
chr1	160693047	160693547
chr16	72913128	72913628
chr12	39938997	39939497
chr8	120050989	120051489
chr8	25211730	25212230
chr4	84030846	84031346
chr4	29122964	29123464
chr17	30474817	30475317
chr16	51352067	51352567
chr17	12709993	12710493
chr4	97611417	97611917
chr10	122894499	122894999
chr13	32183137	32183637
chr8	61776244	61776744
chr13	20242358	20242858
chr3	14971853	14972353
chr6	118958542	118959042
chr12	13518041	13518541
chr5	61080696	61081196
chr9	116729119	116729619
chr14	20431724	20432224
chr8	74974173	74974673
chr4	76766847	76767347
chr10	18475070	18475570
chr2	148327654	148328154
chr2	4620909	4621409
chr16	77689387	77689887
chr14	120705104	120705604
chr13	34643389	34643889
chr3	27580170	27580670
chr15	3344916	3345416
chr1	119863440	119863940
chr2	10993830	10994330
chr19	59156556	59157056
chr18	47065151	47065651
chr12	68045584	68046084
chr1	80015399	80015899
chr1	163705402	163705902
chr11	11851672	11852172
chr5	23529192	23529692
chr10	120501393	120501893
chr2	168466047	168466547
chr3	121576888	121577388
chr1	184244216	184244716
chr5	30013012	30013512
chr13	45018318	45018818
chr17	12868353	12868853
chr2	115764914	115765414
chr17	24349122	24349622
chr9	96583111	96583611
chrX	21450827	21451327
chr14	123470478	123470978
chr17	45319496	45319996
chr12	112990923	112991423
chr19	14416861	14417361
chr4	5584239	5584739
chr3	56280495	56280995
chr2	80144453	80144953
chr15	10735967	10736467
chr1	75040358	75040858
chr15	63445033	63445533
chr13	82066781	82067281
chr10	95780778	95781278
chr4	41399818	41400318
chr2	125000429	125000929
chr5	17210759	17211259
chr1	79995796	79996296
chr4	85218915	85219415
chr17	74942131	74942631
chr15	90463248	90463748
chr12	58219032	58219532
chr11	57918437	57918937
chr15	63191700	63192200
chr8	86821911	86822411
chr9	71959627	71960127
chr18	9190725	9191225
chr5	150465155	150465655
chr1	170664957	170665457
chr8	15012712	15013212
chr10	110059369	110059869
chr13	30177294	30177794
chr2	71280567	71281067
chr3	8796613	8797113
chr10	37400227	37400727
chr1	39713993	39714493
chr13	83461434	83461934
chr3	143375588	143376088
chr15	58580252	58580752
chr12	79707603	79708103
chr1	133941620	133942120
chr11	45718216	45718716
chr3	118465799	118466299
chr1	178573367	178573867
chr10	29824837	29825337
chr1	38262324	38262824
chr13	113630193	113630693
chr1	17606406	17606906
chr16	63960761	63961261
chr2	137152322	137152822
chr15	33335588	33336088
chr3	27888105	27888605
chr10	70428076	70428576
chr15	11075745	11076245
chr13	15089104	15089604
chr1	160224111	160224611
chr9	104007878	104008378
chr18	48449125	48449625
chr11	44533357	44533857
chr15	63012545	63013045
chr6	139770628	139771128
chr5	5180676	5181176
chr14	86006371	86006871
chr1	16398286	16398786
chr14	62792636	62793136
chr1	174665039	174665539
chr13	103018207	103018707
chr10	38968301	38968801
chr7	81825170	81825670
chr9	49818689	49819189
chr18	18629815	18630315
chr17	80786445	80786945
chr13	26283493	26283993
chrX	41345688	41346188
chr1	194345550	194346050
chr15	5826755	5827255
chr15	10726184	10726684
chr7	136645753	136646253
chr9	91058729	91059229
chr1	132952058	132952558
chr13	83201853	83202353
chr18	84712655	84713155
chr6	98864249	98864749
chr18	78968182	78968682
chr14	120089592	120090092
chr3	113824127	113824627
chr2	76603645	76604145
chr6	93234967	93235467
chr7	130147197	130147697
chr13	39074255	39074755
chr12	85200969	85201469
chr10	41732025	41732525
chr18	60058981	60059481
chr14	70252746	70253246
chr4	85837429	85837929
chr4	97575432	97575932
chr10	91858652	91859152
chr18	46622078	46622578
chr6	147455657	147456157
chr6	38997769	38998269
chr2	57353726	57354226
chr14	105161406	105161906
chr1	45947804	45948304
chr8	39590811	39591311
chr17	4042957	4043457
chr15	42822582	42823082
chr13	38433633	38434133
chr13	99488070	99488570
chr4	80436366	80436866
chr3	20005465	20005965
chr9	20760841	20761341
chr10	102042415	102042915
chr8	115208648	115209148
chr1	42169460	42169960
chr13	6473741	6474241
chr8	36645500	36646000
chr13	41524078	41524578
chr3	52447948	52448448
chr3	57516028	57516528
chr1	162052078	162052578
chr1	34218828	34219328
chr14	88394984	88395484
chr15	77247675	77248175
chr9	77445177	77445677
chr6	137064717	137065217
chr9	73173762	73174262
chr4	137647608	137648108
chr4	7379977	7380477
chr11	109157820	109158320
chr10	111630656	111631156
chr6	22524294	22524794
chr14	35112286	35112786
chr16	87938997	87939497
chr9	101703404	101703904
chr8	68458727	68459227
chr16	72854118	72854618
chr1	20069653	20070153
chr3	151891668	151892168
chr3	98108232	98108732
chr14	34445155	34445655
chr2	124461583	124462083
chr5	22522533	22523033
chr13	51221326	51221826
chr13	52100178	52100678
chr13	91916006	91916506
chr1	163398941	163399441
chr6	12138858	12139358
chr6	86843758	86844258
chr2	55818098	55818598
chr9	60920085	60920585
chr2	166409429	166409929
chr18	63529830	63530330
chr19	31380122	31380622
chr11	33341909	33342409
chr8	55977627	55978127
chr3	31212661	31213161
chr14	44831763	44832263
chr7	137085884	137086384
chr16	87567619	87568119
chr19	27066775	27067275
chr1	162254041	162254541
chr2	178513841	178514341
chr17	17600848	17601348
chr2	5075342	5075842
chr1	60824610	60825110
chr8	10534844	10535344
chr12	77898837	77899337
chr3	95922471	95922971
chr6	82519586	82520086
chr9	83217212	83217712
chr11	45311896	45312396
chr18	42978654	42979154
chr4	13242158	13242658
chr12	106076640	106077140
chr8	120966392	120966892
chr15	56570982	56571482
chr1	80091312	80091812
chr12	102280972	102281472
chr9	50536072	50536572
chr3	101468638	101469138
chr5	70323857	70324357
chr2	165625312	165625812
chr11	62938860	62939360
chr9	37365047	37365547
chr13	90472982	90473482
chr4	71130971	71131471
chr3	133563451	133563951
chr10	34131257	34131757
chr5	30000919	30001419
chr8	92491592	92492092
chr2	168314763	168315263
chr6	14196032	14196532
chr6	127870242	127870742
chr14	37315080	37315580
chr14	36919079	36919579
chr3	115976141	115976641
chr15	30285531	30286031
chr7	98797814	98798314
chr2	38235506	38236006
chr16	45435521	45436021
chr13	56566434	56566934
chr6	147143196	147143696
chr16	81784394	81784894
chr9	84178571	84179071
chr11	40534570	40535070
chr10	93501065	93501565
chr17	12162873	12163373
chr5	107213524	107214024
chr5	103473393	103473893
chr9	32666966	32667466
chr4	71969255	71969755
chr18	75478788	75479288
chr8	28744437	28744937
chr9	104589452	104589952
chr3	16414511	16415011
chr9	74449870	74450370
chr14	37340011	37340511
chr12	16456366	16456866
chr3	128296436	128296936
chr18	63415281	63415781
chr12	117415063	117415563
chr2	73404012	73404512
chr8	105178147	105178647
chr3	48176918	48177418
chr14	102989065	102989565
chr5	113804352	113804852
chr10	86226840	86227340
chr10	64342882	64343382
chr2	49625620	49626120
chr16	76432336	76432836
chr12	68584836	68585336
chr12	35679944	35680444
chr12	39946607	39947107
chr2	145881319	145881819
chr4	71839490	71839990
chr16	33903978	33904478
chr4	84158167	84158667
chr1	64322158	64322658
chr3	149811030	149811530
chr17	80862406	80862906
chr5	104371024	104371524
chr7	130047400	130047900
chr8	23843606	23844106
chr2	139207835	139208335
chr11	65476074	65476574
chr17	29589440	29589940
chr2	33868416	33868916
chr18	74641786	74642286
chr11	110176806	110177306
chr9	83760904	83761404
chr3	82275393	82275893
chr14	21313938	21314438
chr1	162604241	162604741
chr14	74846591	74847091
chr2	52007916	52008416
chr16	23144340	23144840
chr10	26479141	26479641
chr2	108795054	108795554
chr14	76324286	76324786
chr11	28999142	28999642
chr5	124950800	124951300
chr6	6543787	6544287
chr10	126125759	126126259
chr13	60069189	60069689
chr1	158827877	158828377
chr2	132703567	132704067
chr17	36808445	36808945
chr5	49996433	49996933
chr19	58300749	58301249
chr3	122518103	122518603
chr2	59913379	59913879
chr7	83717303	83717803
chr16	12426447	12426947
chr15	10928826	10929326
chr8	42144185	42144685
chr13	104560468	104560968
chr3	154202352	154202852
chr8	18723694	18724194
chr9	70590670	70591170
chr6	101502006	101502506
chr11	32840230	32840730
chr7	114773834	114774334
chr17	56693786	56694286
chr2	167589083	167589583
chr11	16895657	16896157
chr1	79710241	79711199
chr3	124075952	124076452
chr3	143147364	143147864
chr6	117241148	117241648
chr17	86400064	86400564
chr13	17219985	17220485
chrX	47835431	47835931
chr2	14000600	14001100
chr13	92490707	92491207
chr14	104044060	104044560
chr10	62185156	62185656
chr6	106118677	106119177
chr2	171028442	171028942
chr8	87877501	87878001
chr4	88994450	88994950
chr1	16236555	16237055
chr13	80985640	80986140
chr2	173452023	173452523
chr6	109276842	109277342
chr15	32273881	32274381
chr16	77133414	77133914
chr1	165590591	165591091
chr9	53786658	53787158
chr9	85905407	85905907
chr4	47587169	47587669
chr8	35907178	35907678
chr7	114479709	114480209
chr13	95749258	95749758
chr11	77442375	77442875
chr7	49668933	49669433
chr13	20823823	20824323
chr1	163209137	163209637
chr16	64671091	64671591
chr1	84667907	84668407
chr7	125972396	125972896
chr4	83234776	83235276
chr16	45224611	45225111
chr13	45332034	45332534
chr15	58458055	58458555
chr13	60455851	60456351
chr15	7767246	7767746
chr6	7479132	7479632
chr18	88746881	88747381
chr1	174675385	174675885
chr13	57696842	57697342
chr4	17889551	17890051
chr8	39846685	39847185
chr4	32174896	32175396
chr5	44722684	44723184
chr5	135274656	135275156
chr13	58938449	58938949
chr4	4335132	4335632
chr14	28315164	28315664
chr2	105247414	105247914
chr1	163607777	163608277
chr5	17006973	17007473
chr9	16301694	16302194
chr2	53050356	53050856
chr10	42843120	42843620
chr16	95844592	95845092
chr4	49507134	49507634
chr1	42410941	42411441
chr10	113342003	113342503
chr14	21710875	21711375
chr13	115037301	115037801
chr14	76644692	76645192
chr7	113795220	113795720
chr6	36739689	36740189
chr3	37659401	37659901
chr1	36030322	36030822
chr17	84352662	84353162
chr6	141410768	141411268
chr14	101951103	101951603
chr1	169882967	169883467
chr9	21752287	21752787
chr1	90750113	90750613
chr14	6474114	6474614
chr18	57351491	57351991
chr6	28482868	28483368
chr1	71587246	71587746
chr13	109492340	109492840
chr10	16441499	16441999
chr8	86047478	86047978
chr6	137687038	137687538
chr1	35935200	35935700
chr4	137989294	137989794
chr3	52192863	52193363
chr6	125510911	125511411
chr5	96911679	96912179
chr5	149837496	149837996
chr3	129657200	129657700
chr2	66392450	66392950
chr10	98259144	98259644
chr6	143727156	143727656
chr12	52854094	52854594
chr3	151870350	151870850
chr18	24953416	24953916
chr13	99793952	99794452
chr10	18081010	18081927
chr16	73325598	73326098
chr15	55132167	55132667
chr14	47638445	47638945
chr11	48934797	48935297
chr9	79479036	79479536
chr2	75685416	75685916
chr13	37361124	37361624
chr10	108604672	108605172
chr10	97555656	97556156
chr14	121604207	121604707
chr3	131608116	131608616
chr18	61657912	61658412
chr13	107573919	107574419
chr2	106683291	106683791
chr8	83226388	83226888
chr1	120027892	120028392
chr18	54342290	54342790
chr6	126190283	126190783
chr3	130859194	130859694
chr11	88400096	88400596
chr10	73887687	73888187
chr4	115843055	115843555
chr19	14393809	14394309
chr1	138037239	138037739
chr18	6941362	6941862
chr4	129204548	129205048
chr3	105999761	106000261
chr2	77595270	77595770
chr10	104849378	104849878
chr1	174654517	174655017
chr6	112898431	112898931
chr8	103874153	103874653
chr16	50309359	50309859
chr10	122029371	122029871
chr10	95680192	95680692
chr6	55332679	55333179
chr1	167588730	167589230
chr11	86981242	86981742
chr19	14240172	14240672
chr6	116786572	116787072
chr18	15195201	15195701
chr11	79802897	79803397
chr4	14802930	14803430
chr8	35406050	35406550
chr3	109936169	109936669
chr15	62475384	62475884
chr19	30107372	30107872
chr8	8233159	8233659
chr13	35832596	35833096
chr4	89486976	89487476
chr19	17736306	17736806
chr4	105697512	105698012
chr2	69155843	69156343
chr8	41556179	41556679
chr8	17057647	17058147
chr16	46020522	46021022
chr2	102649095	102649595
chr10	87751995	87752495
chr13	48810752	48811252
chr1	77847827	77848327
chr1	150829820	150830320
chr5	83005953	83006453
chr4	130723560	130724060
chr15	102628689	102629189
chr6	8285489	8285989
chr2	16709841	16710341
chr13	94116593	94117093
chr12	118569833	118570333
chr14	64626291	64626791
chr8	88678979	88679479
chr15	41397574	41398074
chrX	166366268	166366768
chr2	18948007	18948507
chr9	23407350	23407850
chr5	15882057	15882557
chr9	68210831	68211331
chr10	59004906	59005406
chr3	59346513	59347013
chr13	101129344	101129844
chr16	48429550	48430050
chr2	61642891	61643391
chr17	78562727	78563227
chr17	4040068	4040568
chr18	57766924	57767424
chr18	24931591	24932091
chrX	133911627	133912127
chr11	11853652	11854152
chr8	44165077	44166032
chr19	55374325	55374825
chr4	108913075	108913575
chr15	63172899	63173399
chr7	92358136	92358636
chr8	107767186	107767686
chr18	80234356	80234856
chr6	17629341	17629841
chr9	44986197	44986697
chr15	77021950	77022450
chr4	57318862	57319362
chr2	70940605	70941105
chr5	98690561	98691061
chr7	82993146	82993646
chr10	38973003	38973503
chr8	103779513	103780013
chr13	20635590	20636090
chr3	42162741	42163241
chr1	40550335	40550835
chr17	75179615	75180115
chr12	108861238	108861738
chr10	118984535	118985035
chr3	36835505	36836005
chr1	62416880	62417380
chr8	61355463	61355963
chr3	49274134	49274634
chr5	143001090	143001590
chr10	122829612	122830112
chr3	149624953	149625453
chrX	56667202	56667702
chr11	79856410	79856910
chr2	45600250	45600750
chrX	101338966	101339466
chr18	51326162	51326662
chr7	76185193	76185693
chr15	44050803	44051303
chr2	117214868	117215368
chr16	44708491	44708991
chr2	160174603	160175103
chr6	136091222	136091722
chr12	99308588	99309088
chr4	6718081	6718581
chr3	115974142	115974642
chr17	12782849	12783349
chr17	12170898	12171398
chr8	103372961	103373461
chr1	184304744	184305244
chr7	82416824	82417324
chr8	34155421	34155921
chr15	93209982	93210482
chr18	26955779	26956279
chr6	59412454	59412954
chr12	85126850	85127350
chr3	158300258	158300758
chr11	62034466	62034966
chr19	43474578	43475078
chr11	113847851	113848351
chr18	78485029	78485529
chr14	79122580	79123080
chr7	101854141	101854641
chr13	35392698	35393198
chr5	33117026	33117526
chr1	45056085	45056585
chr14	21964306	21964806
chr8	11357787	11358287
chr16	93328608	93329108
chr17	79233309	79233809
chr1	186263905	186264405
chr10	39629807	39630307
chr8	24113610	24114110
chr2	73087634	73088134
chr5	17021569	17022069
chr11	8706631	8707131
chr18	58146928	58147428
chr13	29108141	29108641
chr8	82943230	82943730
chr1	42240218	42240718
chr9	95322832	95323332
chr14	25350445	25350945
chr9	14585609	14586109
chr2	102302504	102303004
chr4	130333766	130334266
chr3	151909311	151909811
chr19	59759844	59760344
chr17	62961932	62962432
chr1	170131545	170132045
chr17	31405696	31406196
chr1	13530621	13531121
chr8	69742502	69743002
chr7	140111894	140112394
chr1	81521309	81521809
chr15	12394730	12395230
chr8	89169364	89169864
chr8	36930818	36931318
chr5	90339544	90340044
chr3	129640372	129640872
chr19	20393483	20393983
chr17	88598860	88599360
chr9	81726524	81727024
chr2	27835690	27836190
chr18	26642642	26643142
chr5	93260940	93261440
chr17	16218572	16219072
chr6	6247384	6247884
chr4	101689220	101689720
chr12	99642068	99642568
chr13	68765831	68766331
chr15	70506993	70507493
chr4	100137280	100137780
chr14	60655932	60656432
chr3	66315474	66315974
chr8	24411887	24412387
chr8	125168133	125168633
chr17	66659248	66659748
chr17	71128212	71128712
chr7	65384561	65385061
chr2	174008341	174008841
chr9	14842269	14842769
chr5	36165694	36166194
chr12	94085338	94085838
chr6	116994611	116995111
chr18	55016258	55016758
chr1	121399420	121399920
chr15	36328826	36329326
chr2	71279293	71279793
chr2	32317958	32318458
chr2	125802014	125802514
chr1	55617737	55618237
chr1	14460735	14461235
chr10	65835311	65835811
chr2	148233949	148234449
chr8	53892652	53893152
chr10	76632578	76633078
chr9	24299067	24299567
chr2	73475558	73476058
chr5	131787925	131788425
chr13	19428064	19428564
chr12	44388217	44388717
chr18	6905522	6906022
chr6	18517591	18518091
chr8	79515326	79515826
chr14	123469763	123470263
chr3	56590025	56590525
chr14	37266105	37266605
chr16	35106591	35107091
chr9	23134066	23134566
chr1	67049532	67050032
chr14	102722042	102722542
chr1	185731020	185731520
chr3	40179672	40180172
chr1	45756702	45757202
chr13	79443089	79443589
chr15	71484617	71485117
chr7	51339721	51340221
chr3	86538852	86539352
chr5	64877999	64878499
chr1	120767001	120767501
chr2	65119603	65120103
chr15	41493573	41494073
chr2	143018500	143019000
chr1	128517436	128517936
chr18	48772826	48773326
chr2	27529585	27530085
chr6	145446019	145446519
chr19	29180266	29180766
chr2	164496187	164496687
chr11	70772267	70772767
chr4	34976238	34976738
chr11	61970865	61971365
chr18	55134112	55134612
chr18	64684980	64685480
chr12	58268887	58269387
chr18	33090556	33091056
chr4	8787958	8788458
chr17	12875864	12876364
chr7	80745094	80745594
chr1	179096957	179097457
chrX	115586404	115586904
chr6	6260928	6261428
chr4	87380152	87380652
chr6	56616872	56617372
chr8	103165576	103166076
chr18	65257347	65257847
chr6	50985267	50985767
chr2	125922868	125923368
chr2	130512679	130513179
chr3	118471192	118471692
chr3	30244488	30244988
chr18	17135905	17136405
chr4	57514088	57514588
chr5	89897465	89897965
chr13	53320869	53321369
chr14	22609661	22610161
chr9	120899781	120900281
chr15	85778179	85778679
chr13	45650158	45650658
chr13	58443752	58444252
chr7	135600017	135600517
chr3	152760253	152760753
chr11	102611107	102611607
chr5	130141131	130141631
chr2	144683650	144684150
chr3	68508613	68509113
chr11	43257745	43258245
chr13	104585467	104585967
chr19	23967124	23967624
chr10	14210173	14210673
chr8	80948896	80949396
chr6	82029939	82030439
chr1	151887478	151887978
chr12	77857332	77857832
chr14	45812640	45813140
chr10	97624297	97624797
chr2	167565647	167566147
chr3	61582974	61583474
chr3	54413190	54413690
chr10	8978545	8979045
chr11	104577515	104578015
chr3	127900493	127900993
chr15	84235599	84236099
chr9	14642410	14642910
chr10	18423363	18423863
chr1	168169084	168169584
chr10	70176170	70176670
chr2	66052200	66052700
chr17	85175240	85175740
chr6	87330965	87331465
chr12	57137803	57138303
chr11	51896283	51896783
chr11	118365066	118365566
chr3	79235377	79235877
chr3	103464218	103464718
chr3	148800074	148800574
chr3	141940821	141941321
chr12	45067218	45067718
chr19	21068393	21068893
chr16	34094211	34094711
chr11	19773976	19774476
chr4	118520167	118520667
chr15	66727972	66728472
chr11	51226350	51226850
chr16	87267955	87268455
chr17	44039727	44040227
chr4	58400817	58401317
chr17	83987651	83988151
chr10	56782212	56782712
chr2	159309945	159310445
chr2	125929895	125930395
chr1	134913480	134913980
chr11	16808994	16809494
chr18	11847914	11848414
chr3	9402782	9403282
chr12	54822781	54823281
chr3	145217015	145217515
chr13	73446850	73447350
chr3	18160763	18161263
chr5	66553106	66553606
chr1	162186788	162187288
chr3	66162956	66163456
chr3	40508732	40509672
chr2	131392746	131393246
chr3	14151788	14152288
chr5	47675272	47675772
chr3	121309325	121309825
chr2	50520304	50520804
chr1	152531412	152531912
chrX	52325055	52325555
chr19	38455289	38455789
chr13	105015665	105016165
chr16	49616205	49616705
chr15	12310601	12311101
chr15	66419822	66420322
chrX	48076995	48077495
chr1	92814932	92815432
chr2	145612147	145612647
chr4	64576008	64576508
chr6	134543078	134543578
chr6	126385479	126385979
chr4	8945083	8945583
chr13	83175024	83175524
chr2	18952120	18952620
chr3	145833888	145834388
chr7	117739652	117740152
chr1	135291253	135291753
chr6	147726858	147727358
chr5	72122500	72123000
chr8	120216728	120217228
chr8	48146305	48146805
chr8	128267114	128267614
chr12	5237013	5237513
chr2	95658368	95658868
chr15	102997336	102997836
chr4	86273616	86274116
chr11	49981420	49981920
chr2	153798565	153799065
chr8	106321334	106321834
chr9	22686402	22686902
chr9	92613128	92613628
chr8	26848254	26848754
chr15	12513338	12513838
chr14	122688347	122688847
chr8	86820694	86821194
chr2	157711147	157711647
chr17	85789363	85789863
chr12	117479583	117480083
chr8	35455122	35455622
chr14	17408540	17409040
chr14	23931456	23931956
chr4	154420668	154421168
chr5	3442517	3443017
chr6	121541207	121541707
chr6	101345069	101345569
chr10	118451746	118452246
chr8	11276267	11276767
chr15	90183595	90184095
chr11	119868127	119868627
chr3	55339646	55340146
chr2	133791328	133791828
chr1	184645084	184645584
chr17	25987692	25988192
chr3	114065417	114065917
chr2	29281394	29281894
chr17	79120212	79120712
chr12	7780546	7781046
chr11	119271636	119272136
chr2	71698904	71699404
chr5	99617313	99617813
chr19	48123354	48123854
chr3	38540841	38541341
chr10	121976054	121976554
chr3	90579507	90580007
chr16	37715038	37715538
chr13	109725825	109726325
chr15	8896453	8896953
chr1	162018048	162018548
chr13	3952873	3953373
chr6	71664387	71664887
chr18	65055270	65055770
chr10	25362121	25362621
chr4	125363183	125363683
chr9	48452110	48452610
chr1	46891820	46892320
chr4	76461204	76461704
chr13	97662633	97663133
chr4	9379600	9380100
chr2	7551211	7551711
chr10	125844198	125844698
chr6	112401916	112402416
chr14	45456401	45456901
chr12	101789106	101789606
chr2	70367626	70368126
chr2	110062268	110062768
chr12	95585337	95585837
chr3	115961914	115962414
chr1	192070165	192070665
chr14	10006162	10006662
chr12	73506796	73507296
chr17	60610254	60610754
chr1	152540293	152540793
chr12	80146233	80146733
chr9	51507398	51507898
chr3	83347871	83348371
chr14	105664889	105665389
chr8	29095948	29096448
chr17	59588191	59588691
chr18	38823518	38824018
chr2	159270577	159271077
chr8	56286666	56287166
chr9	16305462	16305962
chr17	62984855	62985355
chr4	5565757	5566257
chr9	47545590	47546090
chr1	182520059	182520559
chr11	88131635	88132135
chr17	85886730	85887230
chr6	51333794	51334294
chr9	22979530	22980030
chr4	40587448	40587948
chr4	5678023	5678523
chr17	14532543	14533043
chr12	104679689	104680189
chr17	68923240	68923740
chr4	81564514	81565014
chr5	132622377	132622877
chr15	38928480	38928980
chr1	57211438	57211938
chr13	89467951	89468451
chr7	137090040	137090540
chr16	50905906	50906406
chr3	36675810	36676310
chr15	12634094	12634594
chr6	6038700	6039200
chr17	67237285	67237785
chr4	106313152	106313652
chr7	139326956	139327456
chr8	64029395	64029895
chr4	133311942	133312442
chr19	24312963	24313463
chr15	27231335	27231835
chr5	98386934	98387434
chr12	103040090	103040590
chr4	8826154	8826654
chr6	118346677	118347177
chr19	6652475	6652975
chr5	74168048	74168548
chr12	85126285	85126785
chr13	57894413	57894913
chr9	105714892	105715392
chr4	57489393	57489893
chr17	67866575	67867075
chr7	136320823	136321323
chr8	79251842	79252342
chr5	66490268	66490768
chr10	66862365	66862865
chr18	48307562	48308062
chr10	118640906	118641406
chr15	77245320	77245820
chr13	44452927	44453427
chr1	44216319	44216819
chr16	52049997	52050497
chr9	117348295	117348795
chr5	129518230	129518730
chr18	16803987	16804487
chr13	90896068	90896568
chr1	150137187	150137687
chr3	122333831	122334331
chr18	61231436	61231936
chr15	32432997	32433497
chr11	58453541	58454041
chr19	55593306	55593806
chr3	62942822	62943322
chr11	106589954	106590454
chr14	8124406	8124906
chr2	48424431	48424931
chr18	47254482	47254982
chr15	92417086	92417586
chr10	107615392	107615892
chr8	68727520	68728020
chr13	26945129	26945629
chr7	96745916	96746416
chr10	39345786	39346286
chr11	98094671	98095171
chr1	12722239	12722739
chr13	107328545	107329045
chr1	134082887	134083387
chr1	171796085	171796585
chr11	71729266	71729766
chr11	47304861	47305361
chr10	36308389	36308889
chr7	111019630	111020130
chr1	13783666	13784166
chr6	4417085	4417585
chr6	127266019	127266519
chr2	115483403	115483903
chr19	6190132	6190632
chr11	33070469	33070969
chr3	152726559	152727059
chr11	107094749	107095249
chr11	104229339	104229839
chr6	6801761	6802261
chr9	71746147	71746647
chr10	38121850	38122350
chr14	58678143	58678643
chr12	25771166	25771666
chr13	101483402	101483902
chr5	66527119	66527619
chr13	116947580	116948080
chr1	152986938	152987438
chr17	26573437	26573937
chr3	117752236	117752736
chr16	57765611	57766111
chr11	48767326	48767826
chr2	72923270	72923770
chr6	94871808	94872308
chr13	68752328	68752828
chr2	35260292	35260792
chr3	39676509	39677009
chr7	123068661	123069161
chr4	83256536	83257036
chr1	30527699	30528199
chr1	73783098	73783598
chr10	128779369	128779869
chr4	72554195	72554695
chr2	11655032	11655532
chr11	55992285	55992785
chr8	122181499	122181999
chr9	85820748	85821248
chr15	31571865	31572365
chr16	37732370	37732870
chr17	50229437	50229937
chr10	85464080	85464580
chr2	29421019	29421519
chr10	83968859	83969359
chrX	169123327	169123827
chr5	143010589	143011089
chr2	148478279	148478779
chr5	21144472	21144972
chr3	50694495	50694995
chr2	28591518	28592018
chr8	82870810	82871310
chr1	168064079	168064579
chr13	83565812	83566312
chr17	14748308	14748808
chr11	115768839	115769339
chr14	61975221	61975721
chr11	118327579	118328079
chr2	141296839	141297339
chr3	147284278	147284778
chr16	45257525	45258025
chr2	33186539	33187039
chr2	172450531	172451031
chr14	71338163	71338663
chr3	132560218	132560718
chr8	33186233	33186733
chr1	152496363	152496863
chr7	74413724	74414224
chr14	76608073	76608573
chr15	37041093	37041593
chr6	92526121	92526621
chr16	9695116	9695616
chr5	93114427	93114927
chr5	5175225	5175725
chr2	147689535	147690035
chr9	101438818	101439318
chr12	87175458	87175958
chr11	96524573	96525073
chr4	36971924	36972424
chr18	81795990	81796490
chr6	53995540	53996040
chr10	41914967	41915467
chr5	103370388	103370888
chr5	21313869	21314369
chr4	103544299	103544799
chr18	17195581	17196081
chr8	95372968	95373468
chr6	47305112	47305612
chr19	37612958	37613458
chr2	167206092	167206592
chr1	63093174	63093674
chr1	163283792	163284292
chr2	74942695	74943195
chr11	101979062	101979562
chr6	49780910	49781410
chr13	30394113	30394613
chr11	59418652	59419152
chr12	8846951	8847451
chr14	12401894	12402394
chr15	90709369	90709869
chr5	134719975	134720475
chr14	33581970	33582470
chr3	68592509	68593009
chr4	105640732	105641232
chr8	8771742	8772242
chr18	83740506	83741006
chr12	111315097	111315597
chr5	151056430	151056930
chr18	81572002	81572502
chr19	22070448	22070948
chr6	47390526	47391026
chr9	82103508	82104008
chr9	63892171	63892671
chr14	59633914	59634414
chr12	116803374	116803874
chr3	137442294	137442794
chr9	26528891	26529391
chr19	38440184	38440684
chr12	33675189	33675689
chr7	71885307	71885807
chr13	91134389	91134889
chr7	76119539	76120039
chrX	99239471	99239971
chr4	31819849	31820349
chr15	55415832	55416332
chr10	71816327	71816827
chr3	121526096	121526596
chr5	62605808	62606308
chr2	5198615	5199115
chr6	66212951	66213451
chr2	84738182	84738682
chr9	51031387	51031887
chr4	59674984	59675484
chr14	24886084	24886584
chr17	90702608	90703108
chr1	45837649	45838149
chr10	83785444	83785944
chr1	33505163	33505663
chr2	93133544	93134044
chr3	106554242	106554742
chr8	40089948	40090448
chr16	57478399	57478899
chr5	132372585	132373085
chr2	9161742	9162242
chr16	46097432	46097932
chr2	110540983	110541483
chr13	37440525	37441025
chr6	135087842	135088342
chr3	33876794	33877294
chr3	90209927	90210427
chr1	176962859	176963758
chr1	170110623	170111123
chr4	141767112	141767612
chr18	9768379	9768879
chr4	95896549	95897049
chr8	107544716	107545216
chr1	117290325	117290825
chr19	56089738	56090238
chr8	22787484	22787984
chr4	134156691	134157191
chr2	70370222	70370722
chr18	22193739	22194239
chr2	170551998	170552498
chr18	4518475	4518975
chr5	9092701	9093201
chr11	35357914	35358414
chr9	95075832	95076332
chr16	44053201	44053701
chr5	76416026	76416526
chr5	81474442	81474942
chr3	128519824	128520324
chr18	33482341	33482841
chr4	9233743	9234243
chr7	141566989	141567489
chr3	75170049	75170549
chr3	87660436	87660936
chr1	150760813	150761313
chr4	8906746	8907246
chr10	61397162	61397662
chr13	19454254	19454754
chr15	3422968	3423468
chr2	140934450	140934950
chr17	83983135	83983635
chr16	72914169	72914669
chr18	55325992	55326492
chr2	180148769	180149269
chr11	87407300	87407800
chr1	61103489	61103989
chr6	36830337	36830837
chr2	6483531	6484031
chrX	70550834	70551334
chr10	107905498	107905998
chr8	65067042	65067542
chr6	146221418	146221918
chr7	36262826	36263326
chr18	69410162	69410662
chr10	122915234	122915734
chr12	34598691	34599191
chr10	117669278	117669778
chr9	116945650	116946150
chr1	194231040	194231540
chr15	35865749	35866249
chr4	98318652	98319152
chr4	55117806	55118306
chr8	11569472	11569972
chr15	93536013	93536513
chr11	45680630	45681130
chr3	142350395	142350895
chr2	49627524	49628024
chr8	120715319	120715819
chr7	96899118	96899618
chr19	29557187	29557687
chr3	30724971	30725471
chr11	110534784	110535284
chr1	43005870	43006370
chr18	84777346	84777846
chr18	69408078	69408578
chr19	48009639	48010139
chr2	146818198	146818698
chrX	140510997	140511497
chr3	58342059	58342559
chr11	8438795	8439295
chr16	41557049	41557549
chr19	20792728	20793228
chr13	45564953	45565453
chrX	145430786	145431286
chr9	30521021	30521521
chr8	103234308	103234808
chr1	168308923	168309423
chr10	3280949	3281449
chrX	122373856	122374356
chr10	121150323	121150823
chr5	30095805	30096305
chr19	37781376	37781876
chr11	56911559	56912059
chr4	114349640	114350140
chr3	122111346	122111846
chr5	20778919	20779419
chr15	32328416	32328916
chr17	45048089	45048589
chr11	89501023	89501523
chr17	47177783	47178283
chr1	80709981	80710481
chr1	78347330	78347830
chr8	29963316	29963816
chr11	95614530	95615030
chr6	14750169	14750669
chr3	66373822	66374322
chr6	66012586	66013086
chr5	16507003	16507503
chr15	3321922	3322422
chr4	84088221	84088721
chr10	68672239	68672739
chr3	128520631	128521131
chr4	85758883	85759383
chr18	3653810	3654310
chr6	59408962	59409462
chr3	99047133	99047633
chr10	37434028	37434528
chr2	72409949	72410449
chr9	94362321	94362821
chr15	41642881	41643381
chr15	93696492	93696992
chr3	130086564	130087064
chr6	82140371	82140871
chr6	77545511	77546011
chr11	62941302	62941802
chr13	92365991	92366491
chr2	137568605	137569105
chr7	82579864	82580364
chr10	120646976	120647476
chr14	61761995	61762495
chr16	57440965	57441465
chr3	84075440	84075940
chr12	15729588	15730088
chr12	33129467	33129967
chrX	163296932	163297432
chr5	107541618	107542118
chr5	90507215	90507715
chr6	106426618	106427118
chr1	60825752	60826252
chr5	142392334	142392834
chr10	42249138	42249638
chr15	41413147	41413647
chr3	42023193	42023693
chr14	73013931	73014431
chr6	49670827	49671327
chr9	104693133	104693633
chr19	9052997	9053497
chr2	35322494	35322994
chr5	40735615	40736115
chrX	162085339	162085839
chr8	126694332	126694832
chr14	9251992	9252492
chr14	9449875	9450375
chr8	79079832	79080332
chr13	31077302	31077802
chr15	8283931	8284431
chr8	104022956	104023456
chr17	3396793	3397293
chr4	118077218	118077718
chr11	95808385	95808885
chr2	53029967	53030467
chr10	66879558	66880058
chr13	16915638	16916138
chr12	89286986	89287486
chr1	67346759	67347259
chr15	71516797	71517297
chr6	74218937	74219437
chr14	39120246	39120746
chr1	87036095	87036595
chr19	38671962	38672462
chr7	98332589	98333089
chr13	109802159	109802659
chr12	26501053	26501553
chr14	46026117	46026617
chr1	90838128	90838628
chr6	76456722	76457222
chr2	10166626	10167126
chr13	104393961	104394461
chr14	65704117	65704617
chr14	54609178	54609678
chr9	114948260	114948760
chr7	135833365	135833865
chr4	145199995	145200495
chr16	26079149	26079649
chr12	111743154	111743654
chr5	144142441	144142941
chr15	67289589	67290089
chr1	125395603	125396103
chr3	140253351	140253851
chr4	47342678	47343178
chrX	152172482	152172982
chr1	166819348	166819848
chr18	60480955	60481455
chr17	36237503	36238003
chr2	4445744	4446244
chr12	109897799	109898299
chr1	183807373	183807873
chr7	70219358	70219858
chr4	100144701	100145201
chr11	61602668	61603168
chr3	38534156	38534656
chr3	140575836	140576336
chr1	25504215	25504715
chr14	105016134	105016634
chr8	121468429	121468929
chr4	56120244	56120744
chr11	67360094	67360594
chr6	36841652	36842152
chr3	50307293	50307793
chr18	69400619	69401119
chr17	49535496	49535996
chr17	54896185	54896685
chr11	65244773	65245273
chr5	107167736	107168236
chr6	34035003	34035503
chr1	60396312	60396812
chr1	137332369	137332869
chr12	88555394	88555894
chr3	122506167	122506667
chr16	91882228	91882728
chr11	62309160	62309660
chr6	53584993	53585493
chr2	48520516	48521016
chr7	75525992	75526492
chr14	110115679	110116179
chr3	152701437	152701937
chr12	73332568	73333068
chr12	99753658	99754158
chr14	64845637	64846137
chr14	121119911	121120411
chr13	81352259	81352759
chr9	83387649	83388149
chr17	69048864	69049364
chr16	64524114	64524614
chr13	25696275	25696775
chr7	128867589	128868089
chr10	106632102	106632602
chr19	17264728	17265228
chr15	41429965	41430465
chr7	128551024	128551524
chr11	55978016	55978516
chr10	4513147	4513647
chr11	112176133	112176633
chr13	92930987	92931487
chr17	20955688	20956188
chr8	54451591	54452091
chr11	107407567	107408067
chr17	3200282	3200782
chr2	25592137	25592637
chr16	63105197	63105697
chr3	144411794	144412294
chr9	72828856	72829356
chr15	88888817	88889317
chr17	25083312	25083812
chr5	122522743	122523243
chr1	154756474	154756974
chr12	71480306	71480806
chr18	41905084	41905584
chrX	53193354	53193854
chr18	11973697	11974197
chr4	126978548	126979048
chr9	42211149	42211649
chr11	33221740	33222240
chr15	11064532	11065032
chr9	60093992	60094492
chr11	40753719	40754219
[truncated: 1,883 more rows]

## Sheet: 1i
chr9	14676202	14676702
chr16	15114827	15115327
chr18	11632862	11633362
chr4	128654434	128654934
chr19	20406412	20406912
chr2	109969859	109970359
chr9	75523637	75524137
chr9	32223995	32224495
chr15	38978263	38978763
chr17	14144233	14144733
chr11	22001492	22001992
chr3	55755058	55755558
chr2	68925522	68926022
chr4	123046229	123046729
chr15	27968120	27968620
chr6	101354101	101354601
chr3	37723983	37724483
chr15	57659950	57660450
chr18	5016711	5017211
chr4	123588880	123589380
chr4	156059623	156060123
chr18	65081774	65082274
chr18	43506346	43506846
chr1	9799829	9800329
chr1	12744708	12745208
chr4	81332742	81333242
chr1	72960122	72960622
chr16	29911185	29911685
chr15	37159322	37159822
chr14	103649990	103650490
chr17	62940646	62941146
chr2	72855543	72856043
chr16	88563238	88563738
chr14	118850566	118851066
chr9	104123870	104124370
chr3	59194078	59194578
chr6	30121475	30121975
chr2	122345525	122346025
chr16	72688307	72688807
chr10	128584153	128584653
chr1	172441904	172442404
chr18	4785392	4785892
chr1	69729200	69729700
chr5	122318881	122319381
chr14	99578953	99579453
chr9	103376455	103376955
chr8	8661043	8661543
chr3	101667140	101667640
chr13	5864029	5864529
chr1	172522419	172522919
chr2	4829601	4830101
chr6	22391106	22391606
chr15	27926855	27927355
chr3	85841715	85842215
chr3	75942372	75942872
chr2	141279172	141279672
chr16	97759599	97760099
chr1	46885229	46885729
chr14	101787774	101788274
chrX	166805476	166805976
chr14	29225897	29226397
chr15	37233190	37233690
chr9	13645118	13645618
chr2	52979087	52979587
chr3	79576081	79576581
chr4	141175643	141176143
chr3	154222188	154222688
chr13	110093943	110094443
chr6	41576476	41576976
chr8	57498760	57499260
chr7	138708286	138708786
chr17	70728905	70729405
chr1	156660181	156660681
chr2	102407492	102407992
chr2	75991369	75991869
chr1	66252133	66252633
chr7	66377014	66377514
chr8	126685396	126685896
chr8	44261050	44261550
chr17	81500689	81501189
chr15	80861226	80861726
chr16	10838797	10839297
chr11	11907952	11908452
chr13	52879780	52880280
chr3	59197477	59197977
chr2	20547085	20547585
chr12	101003074	101003574
chr12	70628553	70629053
chr16	33764408	33764908
chr11	84013132	84013632
chr5	92698452	92698952
chr16	25843557	25844057
chr18	34152483	34152983
chr17	44670266	44670766
chr5	77581228	77581728
chr17	79285178	79285678
chr12	76818077	76818577
chr11	19959757	19960257
chr6	83432966	83433466
chr8	60773338	60773838
chr10	69653162	69653662
chr11	24293839	24294339
chr6	72370952	72371452
chr12	110687923	110688423
chr13	63072270	63072770
chr3	10292523	10293023
chr13	63088180	63088680
chr11	7780540	7781040
chr11	87689518	87690018
chr15	37197831	37198331
chr8	14985972	14986472
chr13	69592196	69592696
chr1	193550732	193551232
chr6	67300834	67301334
chr6	142647579	142648079
chr6	94675602	94676102
chr8	108726505	108727005
chr16	14943461	14943961
chr8	80853318	80853818
chrX	166971653	166972153
chr8	122460462	122460962
chr7	89464054	89464554
chr3	122058444	122058944
chr7	144628231	144628731
chr12	107011063	107011563
chr5	43948018	43948518
chr10	68396136	68396636
chr7	113591082	113591582
chr1	193510025	193510525
chr1	131063967	131064467
chr2	68994855	68995355
chr2	153238365	153238865
chr4	82428044	82428544
chr8	26887107	26887607
chr3	101070778	101071278
chr1	82129849	82130349
chr3	108423990	108424490
chr17	70746572	70747072
chr17	70888574	70889074
chr14	120321984	120322484
chr17	9904544	9905044
chr4	81926583	81927083
chr13	3877202	3877702
chr8	78647811	78648311
chr2	168920004	168920504
chr8	77433308	77433808
chr7	130013063	130013563
chr5	134946568	134947068
chr15	41741807	41742307
chr10	69570925	69571425
chr14	13770618	13771118
chr13	112758275	112758775
chr10	18388715	18389215
chr18	65606301	65606801
chr1	35961912	35962412
chr2	6463940	6464440
chr18	11597088	11597588
chr12	15800807	15801307
chr13	108300556	108301056
chr1	184065893	184066393
chr5	31693086	31693586
chr7	63999091	63999591
chr12	71249524	71250024
chr19	28557524	28558024
chr3	38585418	38585918
chr12	79525931	79526431
chr7	66770691	66771191
chr1	189854653	189855153
chr3	122088274	122088774
chr15	12230418	12230918
chr16	95659210	95659710
chr9	53264284	53264784
chr4	63032582	63033082
chr9	41918769	41919269
chr16	72996051	72996551
chr1	153172378	153172878
chr1	137940205	137940705
chr11	76924819	76925319
chr16	72666535	72667035
chr6	137696719	137697219
chr11	3366378	3366878
chr1	162295447	162295947
chr8	83181774	83182274
chr6	67531172	67531672
chr17	87609557	87610057
chr5	9042657	9043157
chr12	36507017	36507517
chr11	100261917	100262417
chr3	79994183	79994683
chrX	13524210	13524710
chr9	102805967	102806467
chr10	13140241	13140741
chr3	51096278	51096778
chr10	12931437	12931937
chr5	102068021	102068521
chr7	98997724	98998224
chr11	88593880	88594380
chr19	57128061	57128561
chr8	36640225	36640725
chr7	130215738	130216238
chr2	58710123	58710623
chr3	41318803	41319303
chr7	99975421	99975921
chr4	142826163	142826663
chr2	142334349	142334849
chr6	17316656	17317156
chr3	52663269	52663769
chr1	64809044	64809544
chr12	91755277	91755777
chr19	32884207	32884707
chr2	124435534	124436034
chr1	189784571	189785071
chr8	61254133	61254633
chr19	21723777	21724277
chr8	24442377	24442877
chr18	54984511	54985011
chr16	31290755	31291255
chr11	87677990	87678490
chr16	84824634	84825134
chr10	67912446	67912946
chr1	77254291	77254791
chr1	183164248	183164748
chr3	81243304	81243804
chr14	7847635	7848135
chr1	39445214	39445714
chr1	182535085	182535585
chr7	25575913	25576413
chr18	61268740	61269240
chr19	21799800	21800300
chr1	193082368	193082868
chr11	28881451	28881951
chr3	152322100	152322600
chr4	88723425	88723925
chr10	8505649	8506149
chr4	88136153	88136653
chr8	8109714	8110214
chr8	10990723	10991223
chr19	37896056	37896556
chr16	20818742	20819242
chr16	89908120	89908620
chr6	135295371	135295871
chr9	121057691	121058191
chr13	100552237	100552737
chr5	23516876	23517376
chr13	92675914	92676414
chr12	73754288	73754788
chr8	106563794	106564294
chr1	192828900	192829400
chr19	46958473	46958973
chr1	73307219	73307719
chr1	193522010	193522510
chr2	153348049	153348549
chr5	103596266	103596766
chr11	21569461	21569961
chr7	130979577	130980077
chr4	129231872	129232372
chr7	116514420	116514920
chr10	121055391	121055891
chr11	24111928	24112428
chr9	51727853	51728353
chr1	133694411	133694911
chr3	134400646	134401146
chr2	30463828	30464328
chr18	67329178	67329678
chr2	68980838	68981338
chr15	35302391	35302891
chr4	41064094	41064594
chr8	26973979	26974479
chr6	100422010	100422510
chr4	143294337	143294837
chr5	24471511	24472011
chr7	66825595	66826095
chr9	120974499	120974999
chr7	74172708	74173208
chr2	166429899	166430399
chr1	64755895	64756395
chr7	129763590	129764090
chr6	113166671	113167171
chr2	59171483	59171983
chr12	91745769	91746269
chr13	34087195	34087695
chr13	89146003	89146503
chr2	58522568	58523068
chr8	123021254	123021754
chr13	58971277	58971777
chr18	12505286	12505786
chr13	29780720	29781220
chr10	102511665	102512165
chr16	87131184	87131684
chr2	51140429	51140929
chr1	86482741	86483241
chr9	41605438	41605938
chr6	112973399	112973899
chr9	31265947	31266447
chr2	52873278	52873778
chr13	46841575	46842075
chr8	113814032	113814532
chr17	75048169	75048669
chr5	96622576	96623076
chr1	157079494	157079994
chr16	72350392	72350892
chr2	168080434	168080934
chr14	73181082	73181582
chr15	37317870	37318370
chr5	148635044	148635544
chr7	135740434	135740934
chr13	15003130	15003630
chr16	89954439	89954939
chr16	16911920	16912420
chr5	131223100	131223600
chr13	38080024	38080524
chr15	10720508	10721008
chr17	6860305	6860805
chr1	125482748	125483248
chr17	52601093	52601593
chr18	54118889	54119389
chr10	93915665	93916165
chr7	36796376	36796876
chr13	97927726	97928226
chr4	123056464	123056964
chr17	87530438	87530938
chr5	103420502	103421002
chr17	21473339	21473839
chr17	84365845	84366345
chr12	57545858	57546358
chr15	72773053	72773553
chr7	68017023	68017523
chr11	100207199	100207699
chr17	47267043	47267543
chr8	26273288	26273788
chr1	87848568	87849068
chr9	14058752	14059252
chr1	73088395	73088895
chr6	127431070	127431570
chr7	99974554	99975054
chr9	43085194	43085694
chr11	18747498	18747998
chr15	8568691	8569191
chr3	109309393	109309893
chr16	59566390	59566890
chr5	138929872	138930372
chr11	117658924	117659424
chr6	99096926	99097426
chr9	63308620	63309120
chr4	139271468	139271968
chr13	55841089	55841589
chr13	3694768	3695268
chr13	101915488	101915988
chr1	75937262	75937762
chr10	20285723	20286223
chr8	107119241	107119741
chr1	82429049	82429549
chr3	107931599	107932099
chr13	37580768	37581268
chr18	44544923	44545423
chr6	146893862	146894362
chr2	132102433	132102933
chr5	92809035	92809535
chr13	90871567	90872067
chr2	27505235	27505735
chr11	76265295	76265795
chrX	50968507	50969007
chr8	61247563	61248063
chr13	63236424	63236924
chr8	46859592	46860092
chr10	41893291	41893791
chr2	128544621	128545121
chr18	55256877	55257377
chr15	85969729	85970229
chr3	37709612	37710112
chr1	51697618	51698118
chr5	131898005	131898505
chr18	9428713	9429213
chr1	172510473	172510973
chr7	91542702	91543202
chr18	11633864	11634364
chr11	24093968	24094468
chr7	130340743	130341243
chr13	15543724	15544224
chr2	20248235	20248735
chr1	172558204	172558704
chr11	89186820	89187320
chr2	104699626	104700126
chr16	29775795	29776295
chr13	46534240	46534740
chr14	105890919	105891419
chr17	85393844	85394344
chr14	22649551	22650051
chr9	58112610	58113110
chr1	179559481	179559981
chr10	94151402	94151902
chr7	132312498	132312998
chr5	74447957	74448457
chr11	100287233	100287733
chr10	99396540	99397040
chr17	7537456	7537956
chr18	33999324	33999824
chr6	140603418	140603918
chr17	79180513	79181013
chr15	10685713	10686213
chr18	12127597	12128097
chr10	8174240	8174740
chr3	127226207	127226707
chr16	62940487	62940987
chr19	9033191	9033691
chr13	72628471	72628971
chr14	118474223	118474723
chr13	38407982	38408482
chr11	80518504	80519004
chrX	166271476	166271976
chr4	8799472	8799972
chr16	29860167	29860667
chr2	59679526	59680026
chr14	74883146	74883646
chr10	93642775	93643275
chr3	122082221	122082721
chr7	112720153	112720653
chr4	54021876	54022376
chr3	135673640	135674140
chr18	69925387	69925887
chr10	97801513	97802013
chr10	7176096	7176596
chr3	95054419	95054919
chr18	74850169	74850669
chr8	47334109	47334609
chr18	55310052	55310552
chr2	138267097	138267597
chr18	33385535	33386035
chr1	90440786	90441286
chr1	90528226	90528726
chr4	6979978	6980478
chr15	102235401	102235901
chr16	77402836	77403336
chr6	116107580	116108080
chr1	61095540	61096040
chr11	115974711	115975211
chr9	27288515	27289015
chr3	145964329	145964829
chr14	121167139	121167639
chr2	59484921	59485421
chr18	50064858	50065358
chr3	156870442	156870942
chr13	6028698	6029198
chr18	50030676	50031176
chr3	128518696	128519196
chr10	92556766	92557266
chr6	134647569	134648069
chr11	52224305	52224805
chr17	7645050	7645550
chr7	49527390	49527890
chr3	34649802	34650302
chr7	107675172	107675672
chr5	147090511	147091011
chr13	12503382	12503882
chr6	34478620	34479120
chr8	123022704	123023204
chr2	76069650	76070150
chr7	70576305	70576805
chr4	86029993	86030493
chr2	51015222	51015722
chr8	8647775	8648275
chr1	134783865	134784365
chr1	72070490	72070990
chr6	72988939	72989439
chrX	94047992	94048492
chr11	100397665	100398165
chr16	44550688	44551188
chr2	116045724	116046224
chr17	43251508	43252008
chr9	122525648	122526148
chr16	19884068	19884568
chr16	85155766	85156266
chr10	97211867	97212367
chr7	66743434	66743934
chr12	86787047	86787547
chr1	53845773	53846273
chr14	57810863	57811363
chr5	150262285	150262785
chr8	80868834	80869334
chr3	8963958	8964458
chrX	167151417	167151917
chr2	30544951	30545451
chr17	65913985	65914485
chr7	30599881	30600381
chr3	130942982	130943482
chr10	100051263	100051763
chr12	5119648	5120148
chr18	54175187	54175687
chr8	126683868	126684368
chr7	79300796	79301296
chrX	106043962	106044462
chr6	94592249	94592749
chr13	95610752	95611252
chrX	52548228	52548728
chr1	92337370	92337870
chr14	28525525	28526025
chr17	63145103	63145603
chr3	79284084	79284584
chr3	132984083	132984583
chr4	72167610	72168110
chr2	20753172	20753672
chr2	161341490	161341990
chr5	131642893	131643393
chr15	59525877	59526377
chr13	95535400	95535900
chr7	116189685	116190185
chr7	80208072	80208572
chr13	63155071	63155571
chr10	70599287	70599787
chr10	25314100	25314600
chr3	79129148	79129648
chr5	123355970	123356470
chr13	6191851	6192351
chr4	4634547	4635047
chr12	82232144	82232644
chr4	129662253	129662753
chr13	91460811	91461311
chr4	130101960	130102460
chr11	35306866	35307366
chr4	127329875	127330375
chr18	59062142	59062642
chr11	59218283	59218783
chr8	94990818	94991318
chr7	49586503	49587003
chr2	24927974	24928474
chr18	69932871	69933371
chr5	134491476	134491976
chr1	72733263	72733763
chr17	80168167	80168667
chr7	45366946	45367446
chr3	79903760	79904260
chr2	154427831	154428331
chr3	87073108	87073608
chr8	119466176	119466676
chr5	111573571	111574071
chr1	85959091	85959591
chr6	120715198	120715698
chr18	44656039	44656539
chr3	79907284	79907784
chr7	35341250	35341750
chr6	28743519	28744019
chr13	107957775	107958275
chr3	34659694	34660194
chr9	31839176	31839676
chr12	86942005	86942505
chr1	176800878	176801378
chr2	6097041	6097541
chr4	62726220	62726720
chr1	153174784	153175284
chr1	189786735	189787235
chr10	120720065	120720565
chr6	37216280	37216780
chr2	112203006	112203506
chr9	105524154	105524654
chr2	58829149	58829649
chr11	74870991	74871491
chr11	99390828	99391328
chr3	52197974	52198474
chr10	18876251	18876751
chr15	99797896	99798396
chr4	139933023	139933523
chr4	58538674	58539174
chr4	106281449	106281949
chr6	127330119	127330619
chr4	97665106	97665606
chr13	40718939	40719439
chr19	50374778	50375278
chr12	112822291	112822791
chr17	47958105	47958605
chr16	90435647	90436147
chr2	146221806	146222306
chr3	84021734	84022234
chr19	8943926	8944426
chr16	15984216	15984716
chr14	118706079	118706579
chr13	38123599	38124099
chr1	90487809	90488309
chr2	180289557	180290057
chr6	144170520	144171020
chr12	5274531	5275031
chr3	110048032	110048532
chr18	82821625	82822125
chr12	28817232	28817732
chr12	3724927	3725427
chr7	107685859	107686359
chr16	57473465	57473965
chr6	30173904	30174404
chr6	48433166	48433666
chr17	69128015	69128515
chr11	22621933	22622433
chr3	37596463	37596963
chr10	128742529	128743029
chr19	55871192	55871692
chr15	81130027	81130527
chr19	45565627	45566127
chr4	34240982	34241482
chr1	183095776	183096276
chr10	24446089	24446589
chr11	101102818	101103318
chr1	12572713	12573213
chr8	114626761	114627261
chr3	90623473	90623973
chr4	144404448	144404948
chr14	105348865	105349365
chr5	113128170	113128670
chr1	153191628	153192128
chr10	71292123	71292623
chr10	39666279	39666779
chr1	92699110	92699610
chr8	10992019	10992519
chr9	13522603	13523103
chr4	151108319	151108819
chr1	72778844	72779344
chr5	151054247	151054747
chr2	110214207	110214707
chr12	71970942	71971442
chr13	14522195	14522695
chr19	36214474	36214974
chr2	174116894	174117394
chr2	157202846	157203346
chr18	62901349	62901849
chr19	40349646	40350146
chr19	38482453	38482953
chr12	73671797	73672297
chr6	54429362	54429862
chr3	53598142	53598642
chr2	153492584	153493084
chr4	100926568	100927068
chr12	55433780	55434280
chr8	36186882	36187382
chr4	32409442	32409942
chr15	63484173	63484673
chr5	103824094	103824594
chr6	37385511	37386011
chr17	87427179	87427679
chr2	116055839	116056339
chr12	73334065	73334565
chr13	38157627	38158127
chr9	72021381	72021881
chr1	135899909	135900409
chr12	5375512	5376012
chr13	103962984	103963484
chr18	34113613	34114113
chr9	35326898	35327398
chr10	68239828	68240328
chr4	141741686	141742186
chr10	3857987	3858487
chr12	35534835	35535335
chr10	117151179	117151679
chr11	100952173	100952673
chr8	117327389	117327889
chr11	19056641	19057141
chr2	125451680	125452180
chr10	25433376	25433876
chr1	132582283	132582783
chr9	38718802	38719302
chr14	118305902	118306402
chr14	55059977	55060477
chr3	51908372	51908872
chr7	80534915	80535415
chr7	133470332	133470832
chr19	38015463	38015963
chr16	44533454	44533954
chr17	31896778	31897278
chr5	149353057	149353557
chr18	42947813	42948313
chr1	153274577	153275077
chr12	81842871	81843371
chr19	26051438	26051938
chr10	93162535	93163035
chr13	80939251	80939751
chr7	80232453	80232953
chr13	55910958	55911458
chr2	59447640	59448140
chrX	52339991	52340491
chr2	35944664	35945164
chr4	45495337	45495837
chr10	69521891	69522391
chr9	54566889	54567389
chr5	103425092	103425592
chr14	100361311	100361811
chr9	77276768	77277268
chr1	193301586	193302086
chr2	105675102	105675602
chr10	42474915	42475415
chr2	154651414	154651914
chr10	37240622	37241122
chr2	164857282	164857782
chr11	99276721	99277221
chr1	194675742	194676242
chr10	95313988	95314488
chr18	35456843	35457343
chr1	135199262	135199762
chr7	63957087	63957587
chr17	15193882	15194382
chr13	54425160	54425660
chr10	125991768	125992268
chr4	82613875	82614375
chr4	147940783	147941283
chr7	25831796	25832296
chr5	52218108	52218608
chr17	45065220	45065720
chr7	45654554	45655054
chr9	26518661	26519161
chr5	35019568	35020068
chr12	79498504	79499004
chr15	53258217	53258717
chr19	26851364	26851864
chr8	106750812	106751312
chr18	77879796	77880296
chr11	95076554	95077054
chr9	117072349	117072849
chr8	114872477	114872977
chr4	54387434	54387934
chr15	96002842	96003342
chr2	117210659	117211159
chr19	26891420	26891920
chr18	33492528	33493028
chr4	148900651	148901151
chr2	119237353	119237853
chr17	83312711	83313211
chr3	97683778	97684278
chr15	12437936	12438436
chr13	40462453	40462953
chr11	87283632	87284132
chr18	11839249	11839749
chr16	7527977	7528477
chr2	75612849	75613349
chr1	57862024	57862524
chr10	123264705	123265205
chr11	24091699	24092199
chr10	13108443	13108943
chr12	40472137	40472637
chr19	53791701	53792201
chr14	76671135	76671635
chr6	30628002	30628502
chr9	13560616	13561116
chr5	107126369	107126869
chr10	120660421	120660921
chr11	53068304	53068804
chr2	5239480	5239980
chr12	86810720	86811220
chr17	28706759	28707259
chr18	11915824	11916324
chr14	58076035	58076535
chr7	68021705	68022205
chr4	137211839	137212339
chr6	145855663	145856163
chr19	45837089	45837589
chr18	78010164	78010664
chr7	128553265	128553765
chr6	121087494	121087994
chr7	46039757	46040257
chr3	21729308	21729808
chr14	73370692	73371192
chr5	123869499	123869999
chr7	72497236	72497736
chr18	33386488	33386988
chr4	86326620	86327120
chr16	25833384	25833884
chr18	60624021	60624521
chr18	69351813	69352313
chr1	77259234	77259734
chr10	84392174	84392674
chr6	114888902	114889402
chr4	97950237	97950737
chr8	73353420	73353920
chr10	3862528	3863028
chr19	6067654	6068154
chr18	16623216	16623716
chr15	101336399	101336899
chr5	46790507	46791007
chr6	58998819	58999319
chr19	16167158	16167658
chr6	34717153	34717653
chr12	83721220	83721720
chr8	83619587	83620087
chr17	35707892	35708392
chr2	71786722	71787222
chr13	38151110	38151610
chr9	66905989	66906489
chr13	29199929	29200429
chr9	60649582	60650082
chr19	57523354	57523854
chr1	72780660	72781160
chr2	20549235	20549735
chr3	37569698	37570198
chr1	92143848	92144348
chr15	36979761	36980261
chr15	9678003	9678503
chr18	47269130	47269630
chr3	144506110	144506610
chr16	31167457	31167957
chr4	85741800	85742300
chr5	116288810	116289310
chr9	99140108	99140608
chr4	62583246	62583746
chr1	193517933	193518433
chr11	8569541	8570041
chr17	15208017	15208517
chr11	87709850	87710350
chr10	44458484	44458984
chr7	89748380	89748880
chr17	31385856	31386356
chr1	165194167	165194667
chr16	33827597	33828097
chr11	35925500	35926000
chr18	34901298	34901798
chr11	64600383	64600883
chr13	92631510	92632010
chr12	107669671	107670171
chr18	36415211	36415711
chr15	26704907	26705407
chr3	37860045	37860545
chr12	79545776	79546276
chr2	4428266	4428766
chr16	24948142	24948642
chr2	33781614	33782114
chr11	100067615	100068115
chr14	98472068	98472568
chr5	144358018	144358518
chr13	63243467	63243967
chr14	60980232	60980732
chr12	12581286	12581786
chr13	62919725	62920225
chr15	53215443	53215943
chr4	139386949	139387449
chr11	24100299	24100799
chr17	35064944	35065444
chr1	180376656	180377156
chr13	46967315	46967815
chr2	134486382	134486882
chr4	98560155	98560655
chr9	116903324	116903824
chr18	38483341	38483841
chr5	88678418	88678918
chr14	60692872	60693372
chr9	69465204	69465704
chr6	129237836	129238336
chr7	38125621	38126121
chr5	66497490	66497990
chr14	31447839	31448339
chr6	137411816	137412316
chr7	44662116	44662616
chr16	36691413	36691913
chr12	85869353	85869853
chr14	22647969	22648469
chr1	127352141	127352641
chr11	6895478	6895978
chr3	131136685	131137185
chr3	53109778	53110278
chr10	13304682	13305182
chr7	112212905	112213405
chr8	61404177	61404677
chr2	84705244	84705744
chr3	52342953	52343453
chr13	97626915	97627415
chr4	150239920	150240420
chr9	55540803	55541303
chr10	117663312	117663812
chr14	60890223	60890723
chr6	37642747	37643247
chr2	151962347	151962847
chr7	117258522	117259022
chr3	130180475	130180975
chr17	62614104	62614604
chr17	64914218	64914718
chr18	70545708	70546208
chr7	45434420	45434920
chr5	148374602	148375102
chr13	104684354	104684854
chr9	39518539	39519039
chr8	70698661	70699161
chr10	109903709	109904209
chr13	46951463	46951963
chr18	4970835	4971335
chr18	47474212	47474712
chr8	77279862	77280362
chr12	89812070	89812570
chr4	81928498	81928998
chr14	57161135	57161635
chr12	25095939	25096439
chr14	21602071	21602571
chr3	85887417	85887917
chr15	58380323	58380823
chr4	45492605	45493105
chr5	92042462	92042962
chr9	120759728	120760228
chr6	101198546	101199046
chr9	70629626	70630126
chr1	91095412	91095912
chrX	106842558	106843058
chr1	193511867	193512367
chr12	16834483	16834983
chr4	84358496	84358996
chr9	63750524	63751024
chr11	8640159	8640659
chr8	61745082	61745582
chr6	136938646	136939146
chr19	32341002	32341502
chr5	121806253	121806753
chr13	114458534	114459034
chr5	74048959	74049459
chr11	32002729	32003229
chr7	67836182	67836682
chr9	47624153	47624653
chr4	82252006	82252506
chr5	111414054	111414554
chr12	112721741	112722241
chr17	31728985	31729485
chr12	80923500	80924000
chr8	70766461	70766961
chr11	4489504	4490004
chr3	95250792	95251292
chr7	28849744	28850244
chr3	121865011	121865511
chr12	56829436	56829936
chr1	193526392	193526892
chr7	49330121	49330621
chr6	121043572	121044072
chr19	16366708	16367208
chr11	8589378	8589878
chr2	153167944	153168444
chr5	143517933	143518433
chr16	91400946	91401446
chr10	111672724	111673224
chr11	68089832	68090332
chr10	75764110	75764610
chr19	50362626	50363126
chr10	97402910	97403410
chr13	28801329	28801829
chr6	48015983	48016483
chr4	32520598	32521098
chr9	41325729	41326229
chr13	103612674	103613174
chr12	79991041	79991541
chr4	118508989	118509489
chr16	30008846	30009346
chr17	62783599	62784099
chr10	70640015	70640515
chr13	28811026	28811526
chr2	84627551	84628051
chr13	34734639	34735139
chr13	30194710	30195210
chr2	110052889	110053389
chr3	10012287	10012787
chr1	178321865	178322365
chr9	41641315	41641815
chr4	32486676	32487176
chr11	103111770	103112270
chr3	57542815	57543315
chr11	121515912	121516412
chr16	11778459	11778959
chr7	6159184	6159684
chr13	102334269	102334769
chr16	3872139	3872639
chr10	41302966	41303466
chr5	142752132	142752632
chr14	99298334	99298834
chr19	55578094	55578594
chr7	116192862	116193362
chr10	18469274	18469774
chr13	101062498	101062998
chr7	83548433	83548933
chr6	108457187	108457687
chr9	94607766	94608731
chr5	112607899	112608399
chr5	118437004	118437504
chr8	79386802	79387302
chr6	37390539	37391039
chr5	64364449	64364949
chr9	64788050	64788550
chr2	180224793	180225293
chr1	182091699	182092199
chr14	55339008	55339508
chr12	8899911	8900411
chr3	127861302	127861802
chr15	85910033	85910533
chr3	51075330	51075830
chr13	49317010	49317510
chr2	35461065	35461565
chr13	33067213	33067713
chr10	18846412	18846912
chr8	35948787	35949287
chrX	53126064	53126564
chr8	121861459	121861959
chr5	118360150	118360650
chr10	40521500	40522000
chrX	12365570	12366070
chr10	109796861	109797361
chr8	127143593	127144093
chr5	28799366	28799866
chr1	134784568	134785068
chr15	99664122	99664622
chr18	55189894	55190394
chr17	5125527	5126027
chr2	180118972	180119472
chr3	54692478	54692978
chr9	106378634	106379134
chr5	132290561	132291061
chr4	106825217	106825717
chr13	29210404	29210904
chr11	43565731	43566231
chr13	6193637	6194137
chr19	7606247	7606747
chr4	132075166	132075666
chr6	128338847	128339347
chr2	146549228	146549728
chr4	123005154	123005654
chr12	91854445	91854945
chr2	59841458	59841958
chr9	67708492	67708992
chr14	120342229	120342729
chr8	88262985	88263485
chr10	125743810	125744310
chr5	92602720	92603220
chr10	80590138	80590638
chr13	64400893	64401393
chr7	70625059	70625559
chr10	17559495	17559995
chr14	63910312	63910812
chr12	16591396	16591896
chr4	118260585	118261085
chr6	87228093	87228593
chr13	94062758	94063258
chr7	13314163	13314663
chr6	94936834	94937334
chr2	129200497	129200997
chr10	26761973	26762473
chr11	121479587	121480087
chr10	13152819	13153319
chr6	108795968	108796468
chr10	41716432	41716932
chr13	25858254	25858754
chr1	131078738	131079238
chr8	79350201	79350701
chr9	21760129	21760629
chr13	97651774	97652274
chr3	104336285	104336785
chr16	95241520	95242020
chr10	14084794	14085294
chr9	20943801	20944301
chr12	99356499	99356999
chr9	60848431	60848931
chr3	132875781	132876281
chr12	81781003	81781503
chr12	79759041	79759541
chr1	57948253	57948753
chr6	135065298	135065798
chr16	14444241	14444741
chr3	93597106	93597606
chr12	53061395	53061895
chr13	53470729	53471229
chr11	99076639	99077139
chr13	51569247	51569747
chr11	110379828	110380328
chr13	99492881	99493381
chr10	69262841	69263341
chr15	77831258	77831758
chr1	88462432	88462932
chr11	120151117	120151617
chr6	94668081	94668581
chr7	99465817	99466317
chr12	33193485	33193985
chr1	92224222	92224722
chr4	13875273	13875773
chr14	50930796	50931296
chr5	74704389	74704889
chr2	91386478	91386978
chr19	8888612	8889112
chr7	101301903	101302403
chr12	73384711	73385211
chr16	84995558	84996058
chr1	157449873	157450373
chr10	26562938	26563438
chr11	95982481	95982981
chr10	29146720	29147220
chr3	109010764	109011264
chr10	3827311	3827811
chr3	52603329	52603829
chrX	7740120	7740620
chr13	63556533	63557033
chr2	72752505	72753005
chr12	91685851	91686351
chr8	121263397	121263897
chr10	127924942	127925442
chr11	70265756	70266256
chr6	36981543	36982043
chr19	26938834	26939334
chr5	92489618	92490118
chr6	148422072	148422572
chr12	51734639	51735139
chr2	4575113	4575613
chr2	127718755	127719255
chr14	121713243	121713743
chr7	73535201	73535701
chr11	72214824	72215324
chr18	49761161	49761661
chr17	6736921	6737421
chr18	32153108	32153608
chr7	88430007	88430507
chr13	63769546	63770046
chr12	102704830	102705330
chr16	13258989	13259489
chr13	28652199	28652699
chr18	65639894	65640394
chr8	94249718	94250218
chr11	88526746	88527246
chr1	75495113	75495613
chr1	192448443	192449399
chr9	118919917	118920417
chr15	101182699	101183199
chr16	33682674	33683174
chr3	123335441	123335941
chr6	87316780	87317280
chr13	52469744	52470244
chr5	33224343	33224843
chr1	73089620	73090120
chr6	53286872	53287372
chr3	131573524	131574024
chr6	134120689	134121189
chr8	123859279	123859779
chr9	98424585	98425085
chr12	104976210	104976710
chr13	104590025	104590525
chr1	95667396	95667896
chr7	73319967	73320467
chr12	17726492	17726992
chr19	28640840	28641340
chr3	108790420	108790920
chr10	99472035	99472535
chr1	58951166	58951666
chr17	79393722	79394222
chr8	26836213	26836713
chr3	27652556	27653056
chr10	17202890	17203390
chr17	56727619	56728119
chr17	88275018	88275518
chr1	183186762	183187262
chr9	13484186	13484686
chr7	96643816	96644316
chr1	182408890	182409390
chr4	40772898	40773398
chr9	67795282	67795782
chr4	4195348	4195848
chr4	150794981	150795481
chr14	105922683	105923183
chr17	31753341	31753841
chr1	38320163	38320663
chr10	67098362	67098862
chr2	91281343	91281843
chr9	109090471	109090971
chr18	37217056	37217556
chr6	42372919	42373419
chr3	9568509	9569009
chr2	169787838	169788338
chr7	19770349	19770849
chr4	135745055	135745555
chr1	119047914	119048414
chr1	128621886	128622386
chr19	14595423	14595923
chr1	82112455	82112955
chr8	91377237	91377737
chr8	112907395	112907895
chr2	79183287	79183787
chr11	16793203	16793703
chr3	98036087	98036587
chr1	38442849	38443349
chr1	181852964	181853464
chr4	149057936	149058436
chr2	30093470	30093970
chr3	138644413	138644913
chr2	13450840	13451340
chr2	26551555	26552055
chr5	127338909	127339409
chr5	52390925	52391425
chr8	92847325	92847825
chr4	126496394	126496894
chr8	70865485	70865985
chr6	72549171	72549671
chr14	16433136	16433636
chr1	168426281	168426781
chr1	131427384	131427884
chr10	20170386	20170886
chr11	52230371	52230871
chr6	112275205	112275705
chr17	86089968	86090468
chr9	47358031	47358531
chr10	26492074	26492574
chr2	108827381	108827881
chr17	79728381	79728881
chr8	120228106	120228606
chr18	37933134	37933634
chr5	142657039	142657539
chr18	39340836	39341336
chr5	3647760	3648260
chr7	18840425	18840925
chr16	27388103	27388603
chr14	32683888	32684388
chr10	96722416	96722916
chr11	111958019	111958519
chr9	59733025	59733525
chr5	66798617	66799117
chr17	43667001	43667501
chr8	36185682	36186182
chr1	171189543	171190043
chr14	118506288	118506788
chr11	18989651	18990151
chr7	113249392	113249892
chr4	154898892	154899392
chr1	39972368	39972868
chr5	134966235	134966735
chr4	150825426	150825926
chr16	49923592	49924092
chr10	96690851	96691351
chr16	18448042	18448542
chr18	56925379	56925879
chrX	11494047	11494547
chr16	35034197	35034697
chr1	105663509	105664009
chr17	26939448	26939948
chr8	127220278	127220778
chrX	106185626	106186126
chr1	190128724	190129224
chr8	41113631	41114131
chr6	115717519	115718019
chr1	184040817	184041317
chr12	15811479	15811979
chr11	98470213	98470713
chr10	24373956	24374456
chr4	109977662	109978162
chr14	14064756	14065256
chr8	94601566	94602066
chr4	139249898	139250398
chr15	76987447	76987947
chr1	164275353	164275853
chr19	10634686	10635186
chr13	60486229	60486729
chr2	135743232	135743732
chr9	42108394	42108894
chr6	99800221	99800721
chr4	84548123	84548623
chr4	120799625	120800125
chr11	67313700	67314200
chr10	13335351	13335851
chr5	110486642	110487142
chr12	105002743	105003243
chr6	134888386	134888886
chr5	144163102	144163602
chr10	45469490	45469990
chr2	25286814	25287314
chr18	44541009	44541509
chr12	59128967	59129467
chr12	27151267	27151767
chr13	45389377	45389877
chrX	53093367	53093867
chr7	58788620	58789120
chr8	80856577	80857077
chr6	143558045	143558545
chr7	68233529	68234029
chr3	88516349	88516849
chr7	129802125	129802625
chr14	75135790	75136290
chr2	35445532	35446032
chr13	108316083	108316583
chr17	84325471	84325971
chr6	125377934	125378434
chr9	43773409	43773909
chr18	15543884	15544384
chr5	65550321	65550821
chr1	64754697	64755197
chr18	62745767	62746267
chr10	95416568	95417068
chr4	155774362	155774862
chr5	23675745	23676245
chr19	16250807	16251307
chr18	82879215	82879715
chr12	99286684	99287184
chr8	46750523	46751023
chr1	188660312	188660812
chr7	78989160	78989660
chr4	111515602	111516102
chr17	86379412	86379912
chr9	67107917	67108417
chr6	88449117	88449617
chr12	70686982	70687482
chr13	19612450	19612950
chr8	94771888	94772388
chr2	68979900	68980400
chr19	22939963	22940463
chr2	125302268	125302768
chr15	83791677	83792177
chr16	25835578	25836078
chr5	64703864	64704364
chr8	128450396	128450896
chr15	101070735	101071235
chr3	122923967	122924467
chr11	88431274	88431774
chr10	68253824	68254324
chr8	91488706	91489206
chr2	166075193	166075693
chr18	70577790	70578290
chr6	39346892	39347392
chr6	121129937	121130437
chr17	85857997	85858497
chr4	122955335	122955835
chr9	45042299	45042799
chr4	32074499	32074999
chr9	116761332	116761832
chr6	107529591	107530091
chr15	101771900	101772400
chr6	135252609	135253109
chr9	96259709	96260209
chr2	25180435	25180935
chr13	41355632	41356132
chr2	45095877	45096377
chr16	92744305	92744805
chr17	75087332	75087832
chr12	28751548	28752048
chr2	91182916	91183416
chr13	92693152	92693652
chr15	74784658	74785158
chr7	109609913	109610413
chr13	12461326	12461826
chr7	100536822	100537322
chr13	15426766	15427266
chr5	139149729	139150229
chr18	69630358	69630858
chr8	81776851	81777351
chr1	82808580	82809080
chr2	140839846	140840346
chr1	192399773	192400273
chr8	123332578	123333078
chr3	128040328	128040828
chr7	29518446	29518946
chr7	71884680	71885180
chr16	11134498	11134998
chr12	24841861	24842361
chr18	75171106	75171606
chr5	66620146	66620646
chr3	101803718	101804218
chr3	79884816	79885316
chr13	40868918	40869418
chr15	85210947	85211447
chr1	131335469	131335969
chr15	36361256	36361756
chr6	5496422	5496922
chr8	13683543	13684043
chr14	70635631	70636131
chr5	64521399	64521899
chr17	7169631	7170131
chr9	16306478	16306978
chr1	191183278	191183778
chr14	120372984	120373484
chr17	70892983	70893483
chr4	55496458	55496958
chr10	23177073	23177573
chr8	48309884	48310384
chr7	44373785	44374285
chr13	44455026	44455526
chr3	100856236	100856736
chr8	46869422	46869922
chr6	114989788	114990288
chr10	83098538	83099038
chr6	94203789	94204289
chr19	36789949	36790449
chr2	64394629	64395129
chr17	35601582	35602082
chr2	101722779	101723279
chrX	152769484	152769984
chrX	13230643	13231143
chr15	25625452	25625952
chr19	34408900	34409400
chr16	55321810	55322310
chr6	50718606	50719106
chr4	117095728	117096228
chr13	110279967	110280467
chr13	6250977	6251477
chr1	106583081	106583581
chr2	3712343	3712843
chr13	95739509	95740009
chr3	129222487	129222987
chr17	70844962	70845462
chr7	75585343	75585843
chr12	107977725	107978225
chr9	44343875	44344375
chr9	69289607	69290107
chr17	14510390	14510890
chr13	92683285	92683785
chr12	8885253	8885753
chr12	69688330	69688830
chr3	137752792	137753292
chr8	125569652	125570152
chr8	22757413	22757913
chr5	148549302	148549802
chr9	62818131	62818631
chr4	9641992	9642492
chr14	30008803	30009303
chr2	59839832	59840332
chr10	69872325	69872825
chr16	93079493	93079993
chr8	106520437	106520937
chr7	16299588	16300088
chr1	39906818	39907318
chr1	37031747	37032247
chr1	179141250	179141750
chr8	107397448	107397948
chr1	143776901	143777401
chr7	28392600	28393100
chr1	185989350	185989850
chr8	104435983	104436483
chr13	70282986	70283486
chr1	86239006	86239506
chr2	29413234	29413734
chr2	35691540	35692040
chr11	88138749	88139249
chr19	8702304	8702804
chr3	79886295	79886795
chr12	49383599	49384099
chr5	5372853	5373353
chr1	170700381	170700881
chr18	82869930	82870430
chr6	67048095	67048595
chr6	125478819	125479319
chr12	112877193	112877693
chr4	84064575	84065075
chr7	72495869	72496369
chr2	156991823	156992323
chr2	59160484	59160984
chr11	70577144	70577644
chr3	19425957	19426457
chr15	93708469	93708969
chr16	23993423	23993923
chr6	28479939	28480439
chr6	30605898	30606398
chr9	67091498	67091998
chr3	123337461	123337961
chr19	32974791	32975291
chr2	170205842	170206342
chr9	21918031	21918531
chr16	31429649	31430149
chr2	71055421	71055921
chr10	99599296	99599796
chr6	13868723	13869223
chr4	81503860	81504360
chr7	115310469	115310969
chr13	28881296	28881796
chr19	9106805	9107305
chr7	80797040	80797540
chr9	116314112	116314612
chr17	27057038	27057538
chr4	142844973	142845473
chrX	74328676	74329176
chr4	104367296	104367796
chr3	9500626	9501126
chr3	95588560	95589060
chr1	131690392	131690892
chr8	92855105	92855605
chr4	151044559	151045059
chr1	66896099	66896599
chr4	32481553	32482053
chr4	34338344	34338844
chr12	25475306	25475806
chr10	18845606	18846106
chr7	30422072	30422572
chr8	122579101	122579601
chr10	110929704	110930204
chr4	84071608	84072108
chr8	80804002	80804502
chr15	42674739	42675239
chr1	171441459	171441959
chr9	96428280	96428780
chr10	126071315	126071815
chr11	60941593	60942093
chr2	113828824	113829324
chr7	83203876	83204376
chr19	17715584	17716084
chr8	106761187	106761687
chr18	75697470	75697970
chr10	85578020	85578520
chr4	32508556	32509056
chr15	25369415	25369915
chr7	75854471	75854971
chr12	16362268	16362768
chr9	56868233	56868733
chr4	119460598	119461098
chr8	56293439	56293939
chr11	121794567	121795067
chr2	60870715	60871215
chr13	63109415	63109915
chr2	33130851	33131351
chr18	79008981	79009481
chr4	131848050	131848550
chr10	18463089	18463589
chr7	27355777	27356277
chr16	17928253	17928753
chr15	35299358	35299858
chr1	90279067	90279567
chr18	9216275	9216775
chr10	95565113	95565613
chr4	109858858	109859358
chr5	31251728	31252228
chr1	71691515	71692015
chr11	83534619	83535119
chr4	56630225	56630725
chr16	31506977	31507477
chr3	51082869	51083369
chr1	38503421	38503921
chr15	59524604	59525104
chr1	162335349	162335849
chr13	91366503	91367003
chr3	55648345	55648845
chr18	61707477	61707977
chr10	69398633	69399133
chr18	65096880	65097380
chrX	48208470	48208970
chr1	91085684	91086184
chr9	72699757	72700257
chr4	126468435	126468935
chr15	57957973	57958473
chr14	67731565	67732065
chr2	110302174	110302674
chr15	85991575	85992075
chr15	56077739	56078239
chr14	7855126	7855626
chr7	140973538	140974038
chr5	30232307	30232807
chr14	56667943	56668443
chr11	20308948	20309448
chr16	93574640	93575140
chr19	32255370	32255870
chr1	91086336	91086836
chr3	98339714	98340214
chr4	123699309	123699809
chr9	56901004	56901504
chr12	31168253	31168753
chr7	140967764	140968264
chr11	54072865	54073365
chr2	170153559	170154059
chr15	102003859	102004359
chr9	91365754	91366254
chr14	16483727	16484227
chr13	43241149	43241649
chr18	65710878	65711378
chr1	168245563	168246063
chr6	120580006	120580506
chr9	50443898	50444398
chr17	24960506	24961006
chr12	27474521	27475021
chr10	120745718	120746218
chr9	115307287	115307787
chr12	112350255	112350755
chrX	113297937	113298437
chr3	69633480	69633980
chr9	58086566	58087066
chr12	91604557	91605057
chr2	105659855	105660355
chr10	79106448	79106948
chr5	74189781	74190281
chr10	95302224	95302724
chr19	53697735	53698235
chr5	113844583	113845083
chr14	27174849	27175349
chr15	102025145	102025645
chr7	115501541	115502041
chr16	29944233	29944733
chr15	33590648	33591148
chr17	33909139	33909639
chr6	70872101	70872601
chr4	59374209	59374709
chr5	118384847	118385347
chr10	13090507	13091007
chr9	14676202	14676702
chr10	17330907	17331407
chr5	12505687	12506187
chr1	132200619	132201119
chr16	15114827	15115327
chr10	13328525	13329025
chr18	11632862	11633362
chr14	105369631	105370131
chr13	72198488	72198988
chr19	9066075	9066575
chr4	128654434	128654934
chr18	57786239	57786739
chr3	134189989	134190489
chr19	20406412	20406912
chr6	114988113	114988613
chr11	88570866	88571366
chr13	38162632	38163132
chr6	56856722	56857222
chr17	56425165	56425665
chr2	109969859	109970359
chrX	167233046	167233546
chr4	65912337	65912837
chr18	46675842	46676342
chr1	153185923	153186423
chr17	47887679	47888179
chr3	159847534	159848034
chr1	69331585	69332085
chr9	75523637	75524137
chr9	32223995	32224495
chr15	38978263	38978763
chr9	73068063	73068563
chr7	112416486	112416986
chr17	14144233	14144733
chr10	115561211	115561711
chr11	22001492	22001992
chr10	69271235	69271735
chr3	55755058	55755558
chr2	68925522	68926022
chr4	123046229	123046729
chr6	51076942	51077442
chr15	27968120	27968620
chr15	63252891	63253391
chr15	25509875	25510375
chr18	8972797	8973297
chr19	53451279	53451779
chr10	67106953	67107453
chr3	57951171	57951671
chr3	117044280	117044780
chr3	37723983	37724483
chr13	114003434	114003934
chr6	37427999	37428499
chr15	57659950	57660450
chr6	121098528	121099028
chr13	63280300	63280800
chr18	5016711	5017211
chr18	50023752	50024252
chr12	79433745	79434245
chr1	34159908	34160408
chr13	52139269	52139769
chr9	14662816	14663316
chr1	161444788	161445288
chr10	39659857	39660357
chr4	123588880	123589380
chr4	156059623	156060123
chr18	65081774	65082274
chr18	43506346	43506846
chr1	12744708	12745208
chr1	69286297	69286797
chr18	65698307	65698807
chr4	81236156	81236656
chr15	11712727	11713227
chr4	64175902	64176402
chr1	144306203	144306703
chr9	99871672	99872172
chr4	81332742	81333242
chr2	143889868	143890368
chr1	72960122	72960622
chr7	70590376	70590876
chr3	34909253	34909753
chr16	29911185	29911685
chr15	37159322	37159822
chr14	103649990	103650490
chr17	62940646	62941146
chr2	72855543	72856043
chr8	35985271	35985771
chr8	4586265	4586765
chr14	118850566	118851066
chr14	103500831	103501331
chr9	104123870	104124370
chr1	138623983	138624483
chr3	59194078	59194578
chr18	20188186	20188686
chr15	38192933	38193433
chr1	193514278	193514778
chr8	113865608	113866108
chr2	122345525	122346025
chr16	72688307	72688807
chr10	128584153	128584653
chr14	105341711	105342211
chr13	96168971	96169471
chr19	21175323	21175823
chr11	67558749	67559249
chr1	172441904	172442404
chr13	91178410	91178910
chr10	94720277	94720777
chr16	93042778	93043278
chr18	4785392	4785892
chr7	29341758	29342258
chr1	69729200	69729700
chr9	86880277	86880777
chr15	55457730	55458230
chr14	99578953	99579453
chr2	21234778	21235278
chr17	71159124	71159624
chr15	86033877	86034377
chr16	90709654	90710154
chr9	103376455	103376955
chr17	67508223	67508723
chr1	135499044	135499544
chr18	49559042	49559542
chr6	144155000	144155500
chr8	103788227	103788727
chr11	16830445	16830945
chr17	78223916	78224416
chr13	3730224	3730724
chr8	8661043	8661543
chr1	193508167	193508667
chr3	101667140	101667640
chr4	132455027	132455527
chr19	55271234	55271734
chr13	5864029	5864529
chr1	172522419	172522919
chr2	4829601	4830101
chr5	32183265	32183765
chr3	80874046	80874546
chr12	3719196	3719696
chr6	22391106	22391606
chr14	20973772	20974272
chr6	94881112	94881612
chr15	27926855	27927355
chr10	32869485	32869985
chr1	171437204	171437704
chr13	38144937	38145437
chr3	85841715	85842215
chr3	37653941	37654441
chr3	75942372	75942872
chr2	141279172	141279672
chr11	59458939	59459439
chr16	97759599	97760099
chr18	42760093	42760593
chr5	4767799	4768299
chr1	46885229	46885729
chr2	117312691	117313191
chr2	4142455	4142955
chr14	101787774	101788274
chr7	50629104	50629604
chrX	166805476	166805976
chr14	29225897	29226397
chr15	37233190	37233690
chr13	63231473	63231973
chr17	74869502	74870002
chr14	51963619	51964119
chr10	17752453	17752953
chr3	30999514	31000014
chr4	120148564	120149064
chr9	13645118	13645618
chr8	125999859	126000359
chr2	52979087	52979587
chr3	79576081	79576581
chr4	141175643	141176143
chr13	91165923	91166423
chr10	18005354	18005854
chr3	154222188	154222688
chr3	58372297	58372797
chr4	14857152	14857652
chr12	95563330	95563830
chr13	110093943	110094443
chr7	73584178	73584678
chr10	115556799	115557299
chr2	45024403	45024903
chr3	8866125	8866625
chr11	5239710	5240210
chr4	76137498	76137998
chr6	146938902	146939402
chr7	138708286	138708786
chr5	12533688	12534188
chr5	100250395	100250895
chr17	70728905	70729405
chr1	156660181	156660681
chr2	102407492	102407992
chr2	75991369	75991869
chr1	66252133	66252633
chr14	120406108	120406608
chr7	66377014	66377514
chr8	126685396	126685896
chr5	62765982	62766482
chr8	44261050	44261550
chr1	39838792	39839292
chr17	31746677	31747177
chr17	81500689	81501189
chr8	4512036	4512536
chr16	45640350	45640850
chr16	25774551	25775051
chr6	121064117	121064617
chr1	46887791	46888291
chr15	80861226	80861726
chr8	108722670	108723170
chr17	39843928	39844428
chr16	10838797	10839297
chr11	11907952	11908452
chr17	6751253	6751753
chr3	80878537	80879037
chr1	182460746	182461246
chr13	52879780	52880280
chr15	50893115	50893615
chr13	52542119	52542619
chr4	70320593	70321093
chr13	55909877	55910377
chr3	59197477	59197977
chr2	20547085	20547585
chr12	101003074	101003574
chr15	64364385	64364885
chr12	70628553	70629053
chr16	33764408	33764908
chr4	82470175	82470675
chr5	51568231	51568731
chr7	133112432	133112932
chr4	133605164	133605664
chr19	28827708	28828208
chr9	66731097	66731597
chr11	84013132	84013632
chr5	92698452	92698952
chr16	25843557	25844057
chr13	113896676	113897176
chr2	71738481	71738981
chr18	34152483	34152983
chr9	14559470	14559970
chr17	44670266	44670766
chr5	77581228	77581728
chr13	37477774	37478274
chr12	10572003	10572503
chr10	119925848	119926348
chr16	94023536	94024036
chr2	108622752	108623252
chr13	70794137	70794637
chr14	21585592	21586092
chr6	15407899	15408399
chr17	79285178	79285678
chr12	76818077	76818577
chr11	19959757	19960257
chr7	109561750	109562250
chr9	120919023	120919523
chr16	57532122	57532622
chr4	98659426	98659926
chr16	21625763	21626263
chr10	69653162	69653662
chr4	88950572	88951072
chr1	42504543	42505043
chr1	72887839	72888339
chr1	52282174	52282674
chr17	71980746	71981246
chr11	24293839	24294339
chr10	23220407	23220907
chr6	72370952	72371452
chr12	110687923	110688423
chr2	20653066	20653566
chr15	50735948	50736448
chr13	63072270	63072770
chr8	128030800	128031300
chr3	10292523	10293023
chr13	63088180	63088680
chr16	62799429	62799929
chr7	109739866	109740366
chr2	135724468	135724968
chr15	28004474	28004974
chr11	87689518	87690018
chr15	37197831	37198331
chr8	14985972	14986472
chr11	3362806	3363306
chr9	13552367	13552867
chr15	25752415	25752915
chr13	69592196	69592696
chr16	14940406	14940906
chr10	18863284	18863784
chr2	172977380	172977880
chr1	193550732	193551232
chr3	51901087	51901587
chr10	19464314	19464814
chr6	67300834	67301334
chr6	142647579	142648079
chr11	91131132	91131632
chr6	94675602	94676102
chr3	19406171	19406671
chr1	12749239	12749739
chr13	60534744	60535244
chr14	23592867	23593367
chr8	108726505	108727005
chr8	80853318	80853818
chr14	101839994	101840494
chr1	170766861	170767361
chr16	90407845	90408345
chrX	166971653	166972153
chr6	87186819	87187319
chr3	84595167	84595667
chr8	122460462	122460962
chr7	89464054	89464554
chr8	107466761	107467261
chr9	46112266	46112766
chr3	75937934	75938434
chr3	122058444	122058944
chr13	72692117	72692617
chr7	144628231	144628731
chr9	77587041	77587541
chr17	48001895	48002395
chr12	107011063	107011563
chr5	43948018	43948518
chr10	68396136	68396636
chr8	76973064	76973564
chr7	109629855	109630355
chr7	113591082	113591582
chr1	193510025	193510525
chr14	20610090	20610590
chr1	131063967	131064467
chr7	79316282	79316782
chr15	38973421	38973921
chr2	68994855	68995355
chr2	153238365	153238865
chr3	9513689	9514189
chr6	87258747	87259247
chr9	82306218	82306718
chr19	21165633	21166133
chr2	170308937	170309437
chr3	121462716	121463216
chr12	69437069	69437569
chr1	14309857	14310357
chr4	82428044	82428544
chr3	9858316	9858816
chr1	180307619	180308119
chr8	95175635	95176135
chr15	96975105	96975605
chr9	67092982	67093482
chr14	59051456	59051956
chr16	42746155	42746655
chr3	101070778	101071278
chr17	33783241	33783741
chr14	8421023	8421523
chr1	82129849	82130349
chr5	66586284	66586784
chr3	108423990	108424490
chr17	70746572	70747072
chr3	34773655	34774155
chr17	70888574	70889074
chr7	52005952	52006452
chr14	120321984	120322484
chr10	111803395	111803895
chr17	9904544	9905044
chr10	126935531	126936031
chr17	84026088	84026588
chr4	81926583	81927083
chr12	102730378	102730878
chr13	3877202	3877702
chr7	130982381	130982881
chr8	78647811	78648311
chr9	116919434	116919934
chr17	83320379	83320879
chr6	25710646	25711146
chr2	168920004	168920504
chr10	40727003	40727503
chr10	10545163	10545663
chr10	68039608	68040108
chr8	77433308	77433808
chr2	24608612	24609112
chr7	130013063	130013563
chr7	138849606	138850106
chr5	134946568	134947068
chr10	116912550	116913050
chr15	41741807	41742307
chr5	138931993	138932493
chr10	69570925	69571425
chr17	56819752	56820252
chr1	193568507	193569007
chr14	13770618	13771118
chr13	112758275	112758775
chr10	18388715	18389215
chr4	118123123	118123623
chr18	65606301	65606801
chr2	57266899	57267399
chr1	35961912	35962412
chr5	21493591	21494091
chr2	6463940	6464440
chr18	11597088	11597588
chr12	15800807	15801307
chr5	13517904	13518404
chr1	191784989	191785489
chr10	110191936	110192436
chr12	73764601	73765101
chr17	47436323	47436823
chr16	11021640	11022140
chr10	127975505	127976005
chr1	184065893	184066393
chr3	133754600	133755100
chr13	33078263	33078763
chr3	83775379	83775879
chr18	44515098	44515598
chr7	109578885	109579385
chr5	31693086	31693586
chr17	31355698	31356198
chr16	76958543	76959043
chr7	63999091	63999591
chr12	71249524	71250024
chr16	25418168	25418668
chr3	102152847	102153347
chrX	169881668	169882168
chr13	119695660	119696160
chr19	28557524	28558024
chr3	38585418	38585918
chr12	79525931	79526431
chr18	57818894	57819394
chr7	35076615	35077115
chr4	123050833	123051333
chr7	66770691	66771191
chr11	109011660	109012160
chr9	69467434	69467934
chr13	31915246	31915746
chr5	32425628	32426128
chr1	189854653	189855153
chr12	91693530	91694030
chr8	8258360	8258860
[truncated: 4,079 more rows]

## Sheet: 1j
chr20	58401363	58401863
chr11	1855518	1856018
chr20	56232411	56232911
chr14	90910380	90910880
chr8	128680873	128681373
chr17	39810325	39810825
chr19	38663868	38664368
chr9	99808433	99808933
chr3	12800524	12801024
chr4	8102860	8103360
chr11	102139264	102139764
chr20	56010548	56011048
chr11	61137007	61137507
chr11	130016142	130016642
chr1	35220664	35221164
chr20	52684154	52684654
chr11	119562807	119563307
chr7	50446688	50447188
chr11	66453783	66454283
chr18	46547781	46548281
chr14	65146881	65147381
chr4	7000800	7001300
chr5	150994975	150995475
chr6	2810242	2810742
chr9	112078521	112079021
chr17	72940162	72940662
chr16	67995422	67995922
chr11	65560546	65561046
chr19	42703758	42704258
chr17	55370446	55370946
chr11	72906233	72906733
chr20	57032224	57032724
chr1	17786701	17787201
chr2	20435680	20436180
chr1	202025822	202026322
chr1	209989403	209989903
chr6	170534443	170534943
chr11	10509684	10510184
chr6	52368915	52369415
chr11	66845706	66846206
chr11	3025078	3025578
chr15	41157989	41158489
chr4	15907484	15907984
chr11	62267613	62268113
chr1	9896401	9896901
chr3	189110648	189111148
chr16	22325898	22326398
chr14	77016814	77017314
chr12	7055352	7055852
chr8	125868942	125869442
chr7	128533123	128533623
chr20	30606041	30606541
chr17	39956942	39957442
chr11	119999413	119999913
chr11	63766649	63767149
chr12	57379465	57379965
chr16	85394080	85394580
chr14	61747949	61748449
chr14	75033396	75033896
chr14	35805822	35806322
chr11	118134819	118135319
chr3	42556979	42557479
chr2	102246616	102247116
chr7	5588824	5589324
chr19	54676650	54677150
chr7	5436748	5437248
chr1	1397788	1398288
chr8	42147721	42148221
chr16	11753084	11753584
chr4	8032096	8032596
chr20	46438290	46438790
chr16	81962604	81963104
chr20	22565195	22565695
chr9	110151762	110152262
chr14	69143152	69143652
chr16	50733606	50734106
chr5	142100379	142100879
chr4	184278027	184278527
chr19	39329221	39329721
chr10	43521781	43522281
chr17	74023290	74023790
chr6	30778544	30779044
chr20	23080998	23081498
chr6	170341617	170342117
chr9	131664697	131665197
chr10	85938933	85939433
chr20	35022965	35023465
chr14	93195113	93195613
chr6	6803750	6804250
chr9	117041047	117041547
chr9	34744823	34745323
chr17	48581368	48581868
chr6	37024285	37024785
chr9	33229314	33229814
chr20	58635648	58636148
chr11	118012694	118013194
chr1	43487402	43487902
chr20	49287043	49287543
chr1	17846489	17846989
chr10	71097232	71097732
chr16	11721825	11722325
chr2	103280832	103281332
chr4	7980073	7980573
chr5	14475120	14475620
chr8	48293990	48294490
chr16	75519842	75520342
chr2	178034896	178035396
chr20	37245599	37246099
chr9	93732837	93733337
chr3	193548467	193548967
chr3	107725119	107725619
chr16	81655005	81655505
chr2	20431361	20431861
chr20	23117377	23117877
chr4	11430479	11430979
chr12	109208561	109209061
chr11	70079540	70080040
chr9	33417853	33418353
chr3	185255135	185255635
chr10	79658259	79658759
chr12	6421535	6422035
chr8	49621536	49622036
chr17	80793873	80794373
chr13	30682958	30683458
chr3	50354212	50354712
chr12	110685277	110685777
chr13	25239090	25239590
chr14	103007306	103007806
chr16	19649836	19650336
chr4	187840455	187840955
chr19	48229264	48229764
chr20	36771818	36772318
chr11	118858876	118859376
chr16	10688391	10688891
chr14	93392726	93393226
chr17	76268582	76269082
chr20	49609024	49609524
chr16	81614684	81615184
chr4	74485963	74486463
chr1	183155076	183155576
chr11	61394347	61394847
chr1	28520194	28520694
chr8	126044003	126044503
chr3	134069658	134070158
chr11	57671139	57671639
chr9	130814049	130814549
chr7	56077313	56077813
chr8	128872036	128872536
chr16	11706053	11706553
chr9	138818644	138819144
chr18	21452582	21453082
chr1	201366143	201366643
chr11	13119568	13120068
chr1	43889299	43889799
chr1	207200529	207201029
chr4	3386988	3387488
chr1	19687702	19688202
chr20	30198058	30198558
chr14	35839081	35839581
chr7	5646832	5647332
chr19	49567312	49567812
chr14	104334699	104335199
chr9	101544235	101544735
chr1	38492742	38493242
chr10	99331398	99331898
chr2	20412567	20413067
chr16	67438525	67439025
chr4	7966755	7967255
chr9	100908355	100908855
chr5	149853618	149854118
chr2	74210852	74211352
chr8	49608838	49609338
chr2	99485727	99486227
chr8	142249620	142250120
chr9	93683271	93683771
chr9	139587921	139588421
chr5	23466421	23466921
chr3	98231906	98232406
chr9	114828101	114828601
chr10	116080382	116080882
chr12	132861288	132861788
chr12	121363587	121364087
chr20	32923395	32923895
chr6	150590776	150591276
chr4	6765186	6765686
chr9	36858692	36859192
chr2	91799230	91799730
chr1	209589352	209589852
chr7	42923543	42924043
chr11	94482479	94482979
chr17	78694959	78695459
chr20	39762601	39763101
chr20	32902267	32902767
chr1	181013611	181014111
chr16	68790071	68790571
chr4	153918908	153919408
chr19	42555621	42556121
chr16	50730517	50731017
chr1	59042860	59043360
chr11	64339046	64339546
chr3	142677549	142678049
chr1	1900515	1901015
chr19	49842581	49843081
chr17	48876304	48876804
chr1	209830387	209830887
chr1	60280085	60280585
chr16	18973658	18974158
chr11	45952514	45953014
chr15	83611387	83611887
chr4	3463283	3463783
chr1	9938007	9938507
chr12	33049827	33050327
chr1	117079941	117080441
chr15	101899085	101899585
chr11	57060419	57060919
chr4	165457969	165458469
chr9	92300958	92301458
chr2	20382217	20382717
chr2	131774693	131775193
chr6	73974099	73974599
chr16	50564612	50565112
chr2	152801672	152802172
chr10	123844912	123845412
chr7	42237855	42238355
chr16	50431027	50431527
chr8	49616749	49617249
chr22	31649902	31650402
chr20	55149572	55150072
chr12	125353623	125354123
chr11	126275604	126276104
chr4	25867178	25867678
chr20	46450427	46450927
chr6	91121120	91121620
chr18	74800949	74801449
chr11	116577942	116578442
chr14	65222467	65222967
chr2	43427016	43427516
chr15	101253643	101254143
chr3	111329390	111329890
chr16	57846359	57846859
chr22	30217177	30217677
chr19	33538230	33538730
chr20	49875004	49875504
chr17	48600571	48601071
chr16	53407178	53407678
chr2	46559901	46560401
chr9	100924931	100925431
chr6	7480128	7480628
chr5	150999234	150999734
chr16	81177493	81177993
chr13	25243039	25243539
chr19	48170552	48171052
chr7	1115638	1116138
chr20	49055428	49055928
chr14	103393666	103394166
chr20	22743207	22743707
chr3	125366382	125366882
chr11	72938931	72939431
chr11	117945485	117945985
chr7	157082367	157082867
chr5	134986826	134987326
chr11	35949200	35949700
chr17	60747499	60747999
chr9	124043766	124044266
chr1	17274778	17275278
chr20	61488488	61488988
chr1	228103322	228103822
chr17	1673404	1673904
chr9	119632790	119633290
chr14	102966330	102966830
chr7	48039636	48040136
chr5	141095452	141095952
chr2	28659465	28659965
chr1	31122285	31122785
chr5	150414211	150414711
chr10	82231435	82231935
chr7	44347312	44347812
chr11	111831560	111832060
chr14	104647959	104648459
chr2	239628809	239629309
chr17	39774566	39775066
chr20	47997996	47998496
chr2	129813786	129814286
chr5	96054177	96054677
chr17	14109265	14109765
chr16	81565017	81565517
chr5	176816799	176817299
chr7	128947729	128948229
chr9	112318337	112318837
chr11	72447498	72447998
chr4	128630123	128630623
chr4	1909519	1910019
chr11	126272829	126273329
chr9	119618437	119618937
chr19	40904528	40905028
chr3	100319203	100319703
chr13	111067918	111068418
chr11	19298370	19298870
chr3	197798716	197799216
chr21	45182290	45182790
chr11	45757883	45758383
chr4	4394241	4394741
chr20	49378326	49378826
chr11	113258443	113258943
chr9	140614888	140615388
chr2	14428116	14428616
chr3	11812073	11812573
chr11	64451765	64452265
chr2	131566372	131566872
chr20	44883987	44884487
chr2	64589712	64590212
chr20	50573857	50574357
chr20	43803197	43803697
chr11	63888415	63888915
chr6	35044924	35045424
chr5	150637359	150637859
chr19	38794588	38795088
chr15	59576080	59576580
chr6	160807850	160808350
chr17	72548244	72548744
chr18	55755067	55755567
chr11	130067547	130068047
chr11	19266140	19266640
chr13	114781108	114781608
chr5	167186435	167186935
chr7	22397149	22397649
chr2	23892749	23893249
chr17	3657680	3658180
chr7	55035021	55035521
chr3	181930193	181930693
chr1	228200958	228201458
chr5	159716613	159717113
chr13	99698227	99698727
chr17	77889821	77890321
chr2	28600754	28601254
chr6	169740442	169740942
chr5	167715257	167715757
chr12	32871788	32872288
chr20	55201433	55201933
chr7	2760471	2760971
chr18	74518215	74518715
chr20	62173034	62173534
chr9	38500137	38500637
chr5	73920287	73920787
chr16	56725739	56726239
chr16	70602655	70603155
chr6	83167769	83168269
chr9	88694246	88694746
chr2	69745864	69746364
chr1	3594761	3595261
chr5	141744061	141744561
chr19	35739102	35739602
chr8	122788488	122788988
chr8	49777410	49777910
chr8	98767629	98768129
chr5	2780414	2780914
chr9	111324407	111324907
chr16	29480979	29481479
chr16	89542737	89543237
chr20	46061183	46061683
chr16	10402359	10402859
chr3	127244117	127244617
chr9	93704879	93705379
chr16	84706748	84707248
chr11	64738186	64738686
chr9	136002674	136003174
chr15	99975485	99975985
chr7	101796498	101796998
chr17	876224	876724
chr21	44726832	44727332
chr3	134316364	134316864
chr4	110910174	110910674
chr14	100046250	100046750
chr16	19017030	19017530
chr20	22370768	22371268
chr11	13095034	13095534
chr16	68778609	68779109
chr10	6341110	6341610
chr13	41568128	41568628
chr20	46293660	46294160
chr10	126953493	126953993
chr14	20869260	20869760
chr6	10084791	10085291
chr15	42124979	42125479
chr20	51539582	51540082
chr12	6744905	6745405
chr3	50661943	50662443
chr16	50753003	50753503
chr12	6382036	6382536
chr8	101470884	101471384
chr19	13969328	13969828
chr12	50036124	50036624
chr17	55978678	55979178
chr2	70555996	70556496
chr11	65778976	65779476
chr11	113930013	113930513
chr3	129412994	129413494
chr2	20379381	20379881
chr7	45073445	45073945
chr14	77589948	77590448
chr15	75055757	75056257
chr18	74826365	74826865
chr17	39807666	39808166
chr11	129309971	129310471
chr20	19908986	19909486
chr20	39193617	39194117
chr9	32604093	32604593
chr10	116005163	116005663
chr20	55291855	55292355
chr20	24997888	24998388
chr8	124674119	124674619
chr10	80710691	80711191
chr3	139153695	139154195
chr8	104132450	104132950
chr7	47597430	47597930
chr12	132221566	132222066
chr3	52440261	52440761
chr11	45001176	45001676
chr20	40020254	40020754
chr16	12120838	12121338
chr17	47964472	47964972
chr12	110808480	110808980
chr20	37499286	37499786
chr11	8835639	8836139
chr5	175980437	175980937
chr3	113255488	113255988
chr12	48162133	48162633
chr7	20256947	20257447
chr15	53364246	53364746
chr5	134492236	134492736
chr11	130029430	130029930
chr2	43164243	43164743
chr2	24243899	24244399
chr16	78245762	78246262
chr2	9526669	9527169
chr2	74652673	74653173
chr11	108211663	108212163
chr11	57548979	57549479
chr10	124053478	124053978
chr20	49113540	49114040
chr9	37967106	37967606
chr8	87014918	87015418
chr17	70464285	70464785
chr9	111342201	111342701
chr9	84241364	84241864
chr11	72354333	72354833
chr20	48586387	48586887
chr4	146734046	146734546
chr7	7140006	7140506
chr6	7505540	7506040
chr9	37729398	37729898
chr20	56887782	56888282
chr14	75667028	75667528
chr16	10746863	10747363
chr5	173193324	173193824
chr4	100736837	100737337
chr3	195862689	195863189
chr8	101427906	101428406
chr11	35915627	35916127
chr4	77818969	77819469
chr17	73120294	73120794
chr16	56358230	56358730
chr4	56475642	56476142
chr6	33636651	33637151
chr10	75648421	75648921
chr3	13895315	13895815
chr10	105631853	105632353
chr16	87520901	87521401
chr4	56600002	56600502
chr3	195834794	195835294
chr1	207205918	207206418
chr11	17819799	17820299
chr10	120261182	120261682
chr11	79130088	79130588
chr6	90660746	90661246
chr3	72674699	72675199
chr7	54899406	54899906
chr1	27669027	27669527
chr16	68524877	68525377
chr10	81744541	81745041
chr3	58200460	58200960
chr20	43986017	43986517
chr16	84430172	84430672
chr7	100875647	100876147
chr19	46714373	46714873
chr20	23142781	23143281
chr6	225015	225515
chr10	49679316	49679816
chr7	30446659	30447159
chr15	90734214	90734714
chr16	73049455	73049955
chr11	94613292	94613792
chr8	134224356	134224856
chr2	160761023	160761523
chr8	145079249	145079749
chr17	80744892	80745392
chr3	9217080	9217580
chr1	180137167	180137667
chrX	107244075	107244575
chr9	97316592	97317092
chr3	41143452	41143952
chr20	46472910	46473410
chr3	185445737	185446237
chr17	3461847	3462347
chr7	431290	431790
chr14	99423489	99423989
chr14	69172486	69172986
chr1	235242721	235243221
chr1	6217663	6218163
chr6	125367086	125367586
chr12	123735311	123735811
chr11	64044095	64044595
chr16	68106149	68106649
chr12	125412675	125413175
chr3	53033162	53033662
chr19	3520711	3521211
chr17	74128271	74128771
chr5	72910879	72911379
chr3	186478170	186478670
chr3	126191097	126191597
chr10	27158397	27158897
chr5	150952194	150952694
chr17	75282384	75282884
chr6	125595014	125595514
chr4	9926286	9926786
chr14	71237177	71237677
chr14	24743199	24743699
chr18	8786728	8787228
chr2	173273090	173273590
chr7	409097	409597
chr7	74024633	74025133
chr20	4142447	4142947
chr9	132040529	132041029
chr4	1294814	1295314
chr5	92932757	92933257
chr7	101652109	101652609
chr6	166883670	166884170
chr17	73685311	73685811
chr16	22429014	22429514
chr1	26503663	26504163
chr9	74764076	74764576
chr16	15707507	15708007
chr1	241852129	241852629
chr7	157092667	157093167
chr7	33080353	33080853
chr11	114025053	114025553
chr10	27235178	27235678
chr4	1606510	1607010
chr3	192568157	192568657
chr5	106209313	106209813
chr1	153095284	153095784
chr14	25011511	25012011
chr1	201449511	201450011
chr9	130911494	130911994
chr12	53298581	53299081
chr20	50720080	50720580
chr14	50417514	50418014
chr20	39191960	39192460
chr14	21510196	21510696
chr19	38480891	38481391
chr10	116060824	116061324
chr3	72773200	72773700
chr6	36575660	36576160
chr18	72895447	72895947
chr10	30654118	30654618
chr3	139372369	139372869
chr9	71719961	71720461
chr1	68281089	68281589
chr1	35245163	35245663
chr10	80778282	80778782
chr18	77722254	77722754
chr1	25520953	25521453
chr5	148675836	148676336
chr19	11375063	11375563
chr14	99593940	99594440
chr1	6086022	6086522
chr17	35278732	35279232
chr11	66648504	66649004
chr20	46424019	46424519
chr19	45679089	45679589
chr20	20761059	20761559
chr9	86752861	86753361
chr11	12211037	12211537
chr7	47715380	47715880
chr12	106505872	106506372
chr15	31757492	31757992
chr1	41472550	41473050
chr15	42130893	42131393
chr2	178187372	178187872
chr2	234600032	234600532
chr1	62696385	62696885
chr14	35801382	35801882
chr19	52229210	52229710
chr12	121622152	121622652
chr20	23120084	23120584
chr20	4693916	4694416
chr9	88129036	88129536
chr11	61792847	61793347
chr5	142065438	142065938
chr1	16886084	16886584
chr8	48265704	48266204
chr1	60139402	60139902
chr8	125667450	125667950
chr1	95086877	95087377
chr16	48229038	48229538
chr9	131033318	131033818
chr15	98546750	98547250
chr5	175827625	175828125
chr1	9903422	9903922
chr20	43883106	43883606
chr17	25798672	25799172
chr1	117753339	117753839
chr7	6438520	6439020
chr17	33775594	33776094
chr20	23030238	23030738
chr10	49541859	49542359
chr21	44781611	44782111
chr17	48506045	48506545
chr4	8338129	8338629
chr5	150978484	150978984
chr3	46734184	46734684
chr17	26734624	26735124
chr2	198479719	198480219
chr3	50433763	50434263
chr22	29744901	29745401
chr11	69926657	69927157
chr20	34730624	34731124
chr10	79702749	79703249
chr11	76902543	76903043
chr14	104048612	104049112
chr2	109539425	109539925
chr20	61195858	61196358
chr11	77739445	77739945
chr3	128506580	128507080
chr1	200628329	200628829
chr8	125638935	125639435
chr4	13945769	13946269
chr12	112550220	112550720
chr7	155714572	155715072
chr1	118752240	118752740
chr20	19233206	19233706
chr10	124269762	124270262
chr6	73933875	73934375
chr19	909139	909639
chr7	139126659	139127159
chr11	113317569	113318069
chr8	127559509	127560009
chr19	16181188	16181688
chr14	24457783	24458283
chr20	31974907	31975407
chr11	515097	515597
chr1	100045960	100046460
chr5	171864556	171865056
chr19	4379378	4379878
chr1	180491174	180491674
chr8	125793611	125794111
chr4	20811374	20811874
chr11	69414120	69414620
chr1	224642203	224642703
chr16	81560429	81560929
chr22	25390342	25390842
chr13	41019558	41020058
chr4	611380	611880
chr8	102449233	102449733
chr11	82482714	82483214
chr19	24256581	24257081
chr10	123540539	123541039
chr18	76822756	76823256
chr2	101392851	101393351
chr20	18178296	18178796
chr6	88654276	88654776
chr4	139120550	139121050
chr2	47567132	47567632
chr5	176017277	176017777
chr5	31916364	31916864
chr8	118958560	118959060
chr1	32041465	32041965
chr5	168074117	168074617
chr4	123621269	123621769
chr4	140521109	140521609
chr1	181128461	181128961
chr8	145869840	145870340
chr15	72460293	72460793
chr10	50626996	50627496
chr6	105537812	105538312
chr20	31382110	31382610
chr1	1690091	1690591
chr11	117588458	117588958
chr17	75287575	75288075
chr1	183129013	183129513
chr11	94480786	94481286
chr11	112192483	112192983
chr14	103820755	103821255
chr3	71472371	71472871
chr16	22212999	22213499
chr1	24643492	24643992
chr7	2510555	2511055
chr9	100615269	100615769
chr5	173994594	173995094
chr20	55901634	55902134
chr1	94240720	94241220
chr10	75692003	75692503
chr17	61512682	61513182
chr1	117239179	117239679
chr20	52364602	52365102
chr1	1186172	1186672
chr6	13407983	13408483
chr6	21869580	21870080
chr4	69235136	69235636
chr10	99309636	99310136
chr8	127446026	127446526
chr5	60573401	60573901
chr7	2264962	2265462
chr3	150062795	150063295
chr5	150949893	150950393
chr2	28768697	28769197
chr8	126618578	126619078
chr10	79633325	79633825
chr9	127580916	127581416
chr3	194707205	194707705
chr11	76535842	76536342
chr12	7308187	7308687
chr9	97867680	97868180
chr14	95761484	95761984
chr1	161043264	161043764
chr11	1948021	1948521
chr17	4424512	4425012
chr1	59573154	59573654
chr16	31142160	31142660
chr1	117236381	117236881
chr1	27286678	27287178
chr1	15416822	15417322
chr6	105820627	105821127
chr2	14675221	14675721
chr1	200863748	200864248
chr14	99372710	99373210
chr7	28651486	28651986
chr12	107689427	107689927
chr14	99419809	99420309
chr3	188884761	188885261
chr3	105121332	105121832
chr16	79919150	79919650
chr17	38120018	38120518
chr10	43136172	43136672
chr11	57566389	57566889
chr20	749188	749688
chr7	21050701	21051201
chr20	25003319	25003819
chr2	100484068	100484568
chr17	64672481	64672981
chr17	26834830	26835330
chr12	57569246	57569746
chr11	129490595	129491095
chr9	607364	607864
chr9	20236579	20237079
chr17	29981907	29982407
chr9	124097342	124097842
chr16	75854511	75855011
chr16	28202749	28203249
chr2	20306474	20306974
chr9	22257028	22257528
chr13	110995536	110996036
chr19	6766013	6766513
chr11	112034577	112035077
chr5	6159107	6159607
chr19	59049803	59050303
chr22	20049043	20049543
chr4	188916572	188917072
chr5	177671465	177671965
chr5	3311007	3311507
chr2	70843297	70843797
chr3	112450091	112450591
chr7	55111361	55111861
chr2	74237289	74237789
chr9	132094372	132094872
chr14	64527102	64527602
chr16	82145501	82146001
chr11	112181069	112181569
chr12	123352193	123352693
chr20	58563144	58563644
chr6	150593653	150594153
chr3	13891685	13892185
chr16	15738091	15738591
chr9	6645603	6646103
chr12	707325	707825
chr7	50237106	50237606
chr12	52610976	52611476
chr12	48257242	48257742
chr13	107046096	107046596
chr4	153630857	153631357
chr11	65306743	65307243
chr6	35778888	35779388
chr14	93160244	93160744
chr16	68765838	68766338
chr12	69418134	69418634
chr16	75517038	75517538
chr1	207981506	207982006
chr5	3612622	3613122
chr20	10686491	10686991
chr2	135882980	135883480
chr17	74480758	74481258
chr7	139168175	139168675
chr5	142070121	142070621
chr10	129743605	129744105
chr14	50475615	50476115
chr4	41941053	41941553
chr10	122838187	122838687
chr17	17291318	17291818
chr1	40435352	40435852
chr10	75361142	75361642
chr20	49461190	49461690
chr11	129601220	129601720
chr3	177165717	177166217
chr20	61200380	61200880
chr14	91724464	91724964
chr1	21953446	21953946
chr6	3252609	3253109
chr3	83983535	83984035
chr9	74872620	74873120
chr14	81790357	81790857
chr1	209601826	209602326
chr2	101663802	101664302
chr9	36317767	36318267
chrX	39834824	39835324
chr20	42817393	42817893
chr17	47578817	47579317
chr1	217076663	217077163
chr16	27375756	27376256
chr2	135575754	135576254
chr3	14309434	14309934
chr12	19635632	19636132
chr9	139112096	139112596
chr4	41162011	41162511
chr9	131091173	131091673
chr19	49255993	49256493
chr4	77309592	77310092
chr3	134071207	134071707
chr11	112204954	112205454
chr3	196065313	196065813
chr1	12292232	12292732
chr5	177715877	177716377
chr7	46259654	46260154
chr5	141603195	141603695
chr19	45903434	45903934
chr9	127209183	127209683
[truncated: 30,451 more rows]

[truncated: 1 more sheets: 1k]
